# Supplementary material for: Tracking the effects of PLGA-based nanoparticles on protein expression in living cells through quantitative proteomics
Source: Royal Society of Chemistry journal article supplement (doi:10.1039/d3tb01881d), 2024-01-01
Supplement: d3tb01881d2.xlsx [file d3tb01881d2.xlsx]

## Sheet: Figure 2b
Figure 2b: Size, PDI, and zeta potential variations of the three NPs.
	Diameter (nm)	PDI	Zeta potential (mv)
DDAB@PLGA/Kolliphor EL NPs-1	368.7	0.205	31.8
DDAB@PLGA/Kolliphor EL NPs-2	369.6	0.183	30
DDAB@PLGA/Kolliphor EL NPs-3	349.9	0.127	31.4
10DSS-DDAB@PLGA/Kolliphor EL NPs-1	300	0.101	32.2
10DSS-DDAB@PLGA/Kolliphor EL NPs-2	298.4	0.122	33.8
10DSS-DDAB@PLGA/Kolliphor EL NPs-3	299.3	0.143	32.9
40DSS-DDAB@PLGA/Kolliphor EL NPs-1	296.8	0.181	42.6
40DSS-DDAB@PLGA/Kolliphor EL NPs-2	288	0.078	41.9
40DSS-DDAB@PLGA/Kolliphor EL NPs-3	283	0.102	41.7
70DSS-DDAB@PLGA/Kolliphor EL NPs-1	325.9	0.122	33.1
70DSS-DDAB@PLGA/Kolliphor EL NPs-2	331.9	0.121	33.5
70DSS-DDAB@PLGA/Kolliphor EL NPs-3	331.4	0.108	33.3

## Sheet: Figure 3a
D:\CHENYUWAN\20240212-dia-lumos\ddab-enps-1h-dia-label-fee\Blank-NPs-DIA-Label-free-1.raw	D:\CHENYUWAN\20240212-dia-lumos\ddab-enps-1h-dia-label-fee\Blank-NPs-DIA-Label-free-2.raw	D:\CHENYUWAN\20240212-dia-lumos\ddab-enps-1h-dia-label-fee\Blank-NPs-DIA-Label-free-3.raw	D:\CHENYUWAN\20240212-dia-lumos\ddab-enps-1h-dia-label-fee\ddab-enps-1h-DIA-Label-free-1-.raw	D:\CHENYUWAN\20240212-dia-lumos\ddab-enps-1h-dia-label-fee\ddab-enps-1h-DIA-Label-free-2-.raw	D:\CHENYUWAN\20240212-dia-lumos\ddab-enps-1h-dia-label-fee\ddab-enps-1h-DIA-Label-free-3.raw	Average(Intensity Blank-NPs-DIA-Label-free)	Average(Intensity ddab-enps-1h-DIA-Label-free)	Ratio(Average(Intensity ddab-enps-1h-DIA-Label-free)/Average(Intensity Blank-NPs-DIA-Label-free))	LOG2(Ratio)	Student's T-test Significant D:\CHENYUWAN\20240212-dia-lumos\ddab-enps-1h-dia-label-fee\Blank-NPs-DIA-Label-free_D:\CHENYUWAN\20240212-dia-lumos\ddab-enps-1h-dia-label-fee\ddab-enps-1h-DIA-Label-free	Student's T-test significant	-Log Student's T-test p-value D:\CHENYUWAN\20240212-dia-lumos\ddab-enps-1h-dia-label-fee\Blank-NPs-DIA-Label-free_D:\CHENYUWAN\20240212-dia-lumos\ddab-enps-1h-dia-label-fee\ddab-enps-1h-DIA-Label-free	Student's T-test q-value D:\CHENYUWAN\20240212-dia-lumos\ddab-enps-1h-dia-label-fee\Blank-NPs-DIA-Label-free_D:\CHENYUWAN\20240212-dia-lumos\ddab-enps-1h-dia-label-fee\ddab-enps-1h-DIA-Label-free	Student's T-test Difference D:\CHENYUWAN\20240212-dia-lumos\ddab-enps-1h-dia-label-fee\Blank-NPs-DIA-Label-free_D:\CHENYUWAN\20240212-dia-lumos\ddab-enps-1h-dia-label-fee\ddab-enps-1h-DIA-Label-free	Student's T-test Test statistic D:\CHENYUWAN\20240212-dia-lumos\ddab-enps-1h-dia-label-fee\Blank-NPs-DIA-Label-free_D:\CHENYUWAN\20240212-dia-lumos\ddab-enps-1h-dia-label-fee\ddab-enps-1h-DIA-Label-free	Protein.Group	Protein.Ids	Protein.Names	First.Protein.Description
#!{Type}E	E	E	E	E	E					C	C	N	N	N	N	T	T	T	T
#!{C:Group1}D:\CHENYUWAN\20240212-dia-lumos\ddab-enps-1h-dia-label-fee\Blank-NPs-DIA-Label-free	D:\CHENYUWAN\20240212-dia-lumos\ddab-enps-1h-dia-label-fee\Blank-NPs-DIA-Label-free	D:\CHENYUWAN\20240212-dia-lumos\ddab-enps-1h-dia-label-fee\Blank-NPs-DIA-Label-free	D:\CHENYUWAN\20240212-dia-lumos\ddab-enps-1h-dia-label-fee\ddab-enps-1h-DIA-Label-free	D:\CHENYUWAN\20240212-dia-lumos\ddab-enps-1h-dia-label-fee\ddab-enps-1h-DIA-Label-free	D:\CHENYUWAN\20240212-dia-lumos\ddab-enps-1h-dia-label-fee\ddab-enps-1h-DIA-Label-free
6.12067	6.13691	6.08741	5.98717	5.94115	NaN	6.115	5.96416	0.706578	-0.501079			2.01772	0.0101806	0.15084	5.9264	A0A024R4E5;C9J5E5;C9JBS3;C9JEJ8;C9JES8;C9JHN6;C9JHS7;C9JHZ8;C9JIZ1;C9JK79;C9JT62;C9JZI8	C9JHN6;C9JHS7;C9JZI8;C9JEJ8;C9JES8;C9JHZ8;C9JT62;C9J5E5;C9JIZ1;C9JK79;C9JBS3;A0A024R4E5	A0A024R4E5_HUMAN;C9J5E5_HUMAN;C9JBS3_HUMAN;C9JEJ8_HUMAN;C9JES8_HUMAN;C9JHN6_HUMAN;C9JHS7_HUMAN;C9JHZ8_HUMAN;C9JIZ1_HUMAN;C9JK79_HUMAN;C9JT62_HUMAN;C9JZI8_HUMAN	High density lipoprotein binding protein (Vigilin), isoform CRA_a
6.76755	6.76618	6.78352	6.80037	6.83369	6.79451	6.77242	6.80952	1.08919	0.12326			1.29658	0.039455	-0.0371048	-2.76644	A0A024RCL3;A0A0G2JJ55;A0A0G2JK11;Q96QC4	Q96QC4;A0A024RCL3;A0A0G2JJ55;A0A0G2JK11	A0A024RCL3_HUMAN;A0A0G2JJ55_HUMAN;A0A0G2JK11_HUMAN;Q96QC4_HUMAN	MHC class I polypeptide-related sequence A
6.63501	6.58411	6.60214	6.61092	6.51192	6.47807	6.60709	6.53364	0.844405	-0.243993			0.797453	0.116935	0.0734491	1.72603	A0A075B730;A0A087X1U6	A0A087X1U6;A0A075B730	A0A075B730_HUMAN;A0A087X1U6_HUMAN	Epiplakin
NaN	4.49954	NaN	NaN	4.74913	5.57172	4.49954	5.16042	4.58024	2.19542			0	1	-0.660888	0	A0A075B7D6;A0A075B7D9;A0A075B7E4	A0A075B7D9;A0A075B7D6;A0A075B7E4	A0A075B7D6_HUMAN;A0A075B7D9_HUMAN;A0A075B7E4_HUMAN	TATA-binding protein-associated factor 2N (Fragment)
5.68057	5.66496	5.74337	5.59981	5.69902	5.91922	5.6963	5.73935	1.1042	0.143007			0.16667	0.81392	-0.043049	-0.442071	A0A087WSV8;E9PKG6;H0YD18;V9HW75	A0A087WSV8;V9HW75;E9PKG6;H0YD18	A0A087WSV8_HUMAN;E9PKG6_HUMAN;H0YD18_HUMAN;V9HW75_HUMAN	Nucleobindin 2, isoform CRA_b
6.01534	6.0617	6.02503	5.97718	6.07226	5.97532	6.03402	6.00825	0.942383	-0.0856138			0.299151	0.544633	0.0257726	0.736717	A0A087WVM4;B7ZM99;H0Y327	B7ZM99;H0Y327;A0A087WVM4	A0A087WVM4_HUMAN;B7ZM99_HUMAN;H0Y327_HUMAN	Monofunctional C1-tetrahydrofolate synthase, mitochondrial
6.99986	6.99361	6.9935	6.98991	6.97668	6.96997	6.99566	6.97885	0.962047	-0.0558206			1.26719	0.0415803	0.0168037	2.70075	A0A087WWU8	Q5HYB6;A0A087WWU8;J3KN67;Q5VU61	A0A087WWU8_HUMAN	Tropomyosin alpha-3 chain
6.17262	6.22683	6.16665	6.16732	6.16075	6.16551	6.1887	6.16452	0.945856	-0.0803076			0.556869	0.22294	0.024175	1.25618	A0A087WY03;E5RFV3	E5RFV3;A0A087WY03	A0A087WY03_HUMAN;E5RFV3_HUMAN	Splicing regulatory glutamine/lysine-rich protein 1
6.06367	6.08951	6.13372	6.03674	6.04946	6.0396	6.09563	6.04193	0.883685	-0.178396			1.21243	0.044918	0.0537028	2.5802	A0A087WY61;H0YFY6;K4DIE0	H0YFY6;A0A087WY61;K4DIE0	A0A087WY61_HUMAN;H0YFY6_HUMAN;K4DIE0_HUMAN	Nuclear mitotic apparatus protein 1
5.72058	5.76408	5.71398	5.6692	5.65925	5.68563	5.73288	5.67136	0.867926	-0.204356			1.61022	0.0211005	0.0615174	3.51617	A0A087WYS0;C9J406	C9J406;A0A087WYS0	A0A087WYS0_HUMAN;C9J406_HUMAN	MICOS complex subunit MIC60
NaN	NaN	6.24315	6.09186	NaN	5.96667	6.24315	6.02926	0.611109	-0.710499			0	1	0.213881	0	A0A087WZ02	A0A087WZ02	A0A087WZ02_HUMAN	Diacylglycerol kinase eta (Fragment)
6.57268	6.51713	6.51414	6.67113	6.71229	6.73897	6.53465	6.70746	1.48872	0.574073	+	D:\CHENYUWAN\20240212-dia-lumos\ddab-enps-1h-dia-label-fee\Blank-NPs-DIA-Label-free_D:\CHENYUWAN\20240212-dia-lumos\ddab-enps-1h-dia-label-fee\ddab-enps-1h-DIA-Label-free	2.48967	0.0051949	-0.172814	-6.3032	A0A087WZ13;E9PAU2	E9PAU2;A0A087WZ13;K7EQG2	A0A087WZ13_HUMAN;E9PAU2_HUMAN	Ribonucleoprotein PTB-binding 1
6.66047	6.63641	NaN	6.7773	6.6996	6.76394	6.64844	6.74695	1.25461	0.327234			1.25822	0.0417859	-0.0985074	-3.05569	A0A087WZE6	A0A087WZE6	A0A087WZE6_HUMAN	Beta-1,3-galactosyl-O-glycosyl-glycoprotein beta-1,6-N-acetylglucosaminyltransferase 7
6.48706	NaN	6.46866	6.3997	6.42502	NaN	6.47786	6.41236	0.859997	-0.217596			1.27894	0.0407753	0.0655026	4.18588	A0A087X0K9;G5E9E7	A0A087X0K9;G5E9E7	A0A087X0K9_HUMAN;G5E9E7_HUMAN	Tight junction protein ZO-1
6.23414	6.24126	6.22119	NaN	6.10788	6.00979	6.2322	6.05884	0.67087	-0.575894			1.7252	0.0175257	0.173361	4.64348	A0A087X1S3	A0A087X1S3	A0A087X1S3_HUMAN	E3 ubiquitin-protein ligase HUWE1 (Fragment)
5.6576	5.63399	5.64805	5.68089	5.5958	5.71782	5.64654	5.66484	1.04302	0.0607647			0.190447	0.776165	-0.0182921	-0.497426	A0A0A0MR66	A0A0A0MR66	A0A0A0MR66_HUMAN	RNA binding motif protein 10, isoform CRA_d
5.29891	5.26925	5.18344	5.1798	NaN	5.162	5.25053	5.1709	0.832474	-0.264523			0.753869	0.131492	0.0796293	1.76217	A0A0A0MRM8	A0A0A0MRM8	A0A0A0MRM8_HUMAN	Unconventional myosin-VI
6.75818	6.74787	6.73473	6.67601	6.69791	6.7057	6.74693	6.69321	0.883643	-0.178465	+	D:\CHENYUWAN\20240212-dia-lumos\ddab-enps-1h-dia-label-fee\Blank-NPs-DIA-Label-free_D:\CHENYUWAN\20240212-dia-lumos\ddab-enps-1h-dia-label-fee\ddab-enps-1h-DIA-Label-free	2.06452	0.00956452	0.053723	4.80455	A0A0A0MRM9	A0A0A0MRM9	A0A0A0MRM9_HUMAN	Nucleolar and coiled-body phosphoprotein 1 (Fragment)
6.14236	6.19857	6.16767	6.17348	6.15652	6.16615	6.16953	6.16538	0.990489	-0.0137871			0.0867646	0.914713	0.00415039	0.244452	A0A0A0MS29;E9PQX8;H7C433	E9PQX8;A0A0A0MS29;H7C433	A0A0A0MS29_HUMAN;E9PQX8_HUMAN;H7C433_HUMAN	Mitochondrial fission factor
5.30169	4.98344	5.10653	5.3565	NaN	NaN	5.13055	5.3565	1.68245	0.750566			0	1	-0.225943	0	A0A0A0MS90	A0A0A0MS90	A0A0A0MS90_HUMAN	Methyl-CpG-binding domain protein 1
5.53432	5.31726	5.53331	5.38	5.37733	5.37805	5.46163	5.37846	0.825715	-0.276284			0.503838	0.258469	0.0831695	1.15212	A0A0A6YYJ5;H0YD69	O94854;A0A0A6YYJ5;H0YD69	A0A0A6YYJ5_HUMAN;H0YD69_HUMAN	Microtubule-actin cross-linking factor 1, isoforms 1/2/3/5
6.74481	6.73869	6.72012	6.70484	6.72878	6.73719	6.73454	6.7236	0.975127	-0.0363375			0.375883	0.395791	0.0109386	0.896128	A0A0B4J220	A0A0B4J220	A0A0B4J220_HUMAN	Chromosome 11 open reading frame 48, isoform CRA_c
5.86987	5.90004	5.89006	5.82803	5.81968	5.81798	5.88665	5.8219	0.861477	-0.215116	+	D:\CHENYUWAN\20240212-dia-lumos\ddab-enps-1h-dia-label-fee\Blank-NPs-DIA-Label-free_D:\CHENYUWAN\20240212-dia-lumos\ddab-enps-1h-dia-label-fee\ddab-enps-1h-DIA-Label-free	2.63267	0.00409709	0.0647561	6.887	A0A0B4J2F0	A0A0B4J2F0	PIOS1_HUMAN	Protein PIGBOS1
5.56591	5.58711	5.61007	5.55004	5.51649	5.54129	5.5877	5.53594	0.887653	-0.171932			1.47797	0.0278258	0.051757	3.18835	A0A0C4DFN1	A0A0C4DFN1	A0A0C4DFN1_HUMAN	Mitofusin-1
5.99541	5.98034	6.07973	6.00434	6.01449	5.98811	6.01849	6.00231	0.963433	-0.0537444			0.194933	0.76964	0.0161784	0.507726	A0A0C4DG89	A0A0C4DG89	A0A0C4DG89_HUMAN	Probable ATP-dependent RNA helicase DDX46
5.8964	5.88217	5.95398	5.9339	5.91598	5.90563	5.91085	5.9185	1.01777	0.0254172			0.118847	0.874646	-0.00765117	-0.326247	A0A0C4DGB5;D6RBR1;D6RGF7;E7EN75;E9PSG1;F8W7E0;H0Y944;H0YA91	H0Y944;E9PSG1;A0A0C4DGB5;H0YA91;F8W7E0;D6RGF7;D6RBR1;E7EN75	A0A0C4DGB5_HUMAN;D6RBR1_HUMAN;D6RGF7_HUMAN;E7EN75_HUMAN;E9PSG1_HUMAN;F8W7E0_HUMAN;H0Y944_HUMAN;H0YA91_HUMAN	Calpastatin
5.66543	NaN	NaN	5.82272	5.85592	5.68869	5.66543	5.78911	1.32947	0.410852			0	1	-0.123679	0	A0A0C4DGB9	A0A0C4DGB9	A0A0C4DGB9_HUMAN	Inorganic pyrophosphatase 2, mitochondrial
6.15932	6.22694	6.21808	6.05681	6.12843	6.08414	6.20145	6.08979	0.77329	-0.370918			1.70077	0.018406	0.111657	3.75172	A0A0C4DGP4	A0A0C4DGP4	A0A0C4DGP4_HUMAN	Glucosidase 2 subunit beta (Fragment)
5.29527	5.37821	NaN	5.283	NaN	5.65205	5.33674	5.46752	1.35139	0.434445			0.251243	0.6644	-0.130781	-0.691503	A0A0G2JJL1;A0A140T9L0	A0A0G2JJL1;A0A140T9L0	A0A0G2JJL1_HUMAN;A0A140T9L0_HUMAN	WD repeat-containing protein 46 (Fragment)
NaN	6.25925	6.27708	NaN	6.28848	NaN	6.26816	6.28848	1.04789	0.0674916			0	1	-0.0203171	0	A0A0G2JPP5	A0A0G2JPP5	A0A0G2JPP5_HUMAN	Protein scribble homolog
6.00535	6.04362	6.01583	5.88286	5.85573	5.89341	6.0216	5.87733	0.717351	-0.479248	+	D:\CHENYUWAN\20240212-dia-lumos\ddab-enps-1h-dia-label-fee\Blank-NPs-DIA-Label-free_D:\CHENYUWAN\20240212-dia-lumos\ddab-enps-1h-dia-label-fee\ddab-enps-1h-DIA-Label-free	3.07582	0.00232222	0.144268	9.01121	A0A0G2JQT1;A0A0G2JR96	A0A0G2JR96;A0A0G2JQT1	A0A0G2JQT1_HUMAN;A0A0G2JR96_HUMAN	Cytoplasmic FMR1-interacting protein 1 (Fragment)
NaN	NaN	6.31247	NaN	6.33746	6.27599	6.31247	6.30673	0.986874	-0.0190629			0	1	0.00573826	0	A0A0G2JRI9;A0A0G2JRM4;A0A0G2JRT2;C9JJE7	C9JJE7;A0A0G2JRI9;A0A0G2JRM4;A0A0G2JRT2	A0A0G2JRI9_HUMAN;A0A0G2JRM4_HUMAN;A0A0G2JRT2_HUMAN;C9JJE7_HUMAN	Mucin-20
5.73474	5.76639	5.70736	5.77421	5.79987	5.79135	5.73616	5.78847	1.128	0.173772			1.31381	0.0381392	-0.0523106	-2.80528	A0A0J9YVP6;A0A0J9YVR6;A0A0J9YYL3;E9PMU7;E9PN18;E9PQ56	E9PN18;E9PMU7;E9PQ56;A0A0J9YVP6;A0A0J9YVR6;A0A0J9YYL3	A0A0J9YVP6_HUMAN;A0A0J9YVR6_HUMAN;A0A0J9YYL3_HUMAN;E9PMU7_HUMAN;E9PN18_HUMAN;E9PQ56_HUMAN	Poly(U)-binding-splicing factor PUF60 (Fragment)
6.33571	6.36779	6.25607	6.43896	6.41316	6.32945	6.31986	6.39386	1.18577	0.245828			0.722606	0.142006	-0.0740023	-1.57933	A0A0M3HER2	A0A0M3HER2	A0A0M3HER2_HUMAN	Centromere protein V
6.95658	6.91619	7.06311	6.96394	6.97801	6.98929	6.97863	6.97708	0.996441	-0.00514345			0.0115011	0.999668	0.00154861	0.0348552	A0A0U1RQK9	O94788;Q9UED3;A0A0U1RQK9;H0YMG7;H0YKL3	A0A0U1RQK9_HUMAN	Aldehyde dehydrogenase X, mitochondrial (Fragment)
6.30433	6.31148	6.2899	6.43339	6.47567	6.3607	6.3019	6.42325	1.32237	0.403125			1.62406	0.0206573	-0.121353	-3.55158	A0A0X1KG71	A0A0X1KG71	A0A0X1KG71_HUMAN	Negative elongation factor B
5.31184	5.18174	5.44303	5.01872	5.27262	5.20723	5.3122	5.16619	0.714472	-0.48505			0.611415	0.192147	0.146015	1.36263	A0A1B0GTW6	A0A1B0GTW6	A0A1B0GTW6_HUMAN	Band 4.1-like protein 1 (Fragment)
5.43441	5.4245	5.34295	5.26525	5.13289	5.2556	5.40062	5.21792	0.656592	-0.606931			1.62187	0.0207241	0.182704	3.54594	A0A1B0GUD6;A0A1B0GVV0	A0A1B0GVV0;A0A1B0GUD6	A0A1B0GUD6_HUMAN;A0A1B0GVV0_HUMAN	GRAM domain-containing protein 1B
5.39101	5.50493	5.46249	5.39533	5.43943	5.54018	5.45281	5.45831	1.01275	0.0182828			0.0342965	0.976146	-0.00550365	-0.101461	A0A1B0GV68	A0A1B0GV68	A0A1B0GV68_HUMAN	FERM, RhoGEF and pleckstrin domain-containing protein 1
5.86731	5.85396	5.8318	5.8193	5.80534	5.83272	5.85102	5.81912	0.92917	-0.105985			1.1515	0.0517107	0.0319049	2.44861	A0A1B0GW05	A0A1B0GW05	A0A1B0GW05_HUMAN	Probable C-mannosyltransferase DPY19L1
4.83113	NaN	4.82738	4.83485	4.78221	4.54679	4.82925	4.72128	0.779885	-0.358667			0.382291	0.38707	0.107969	0.944312	A0A1C7CYX1	A0A1C7CYX1	A0A1C7CYX1_HUMAN	ELM2 and SANT domain-containing protein 1
6.1215	5.87104	6.04652	5.21267	6.01308	5.22504	6.01302	5.48359	0.29551	-1.75872			0.897966	0.0926717	0.529428	1.9254	A0AVT1	A0AVT1	UBA6_HUMAN	Ubiquitin-like modifier-activating enzyme 6
7.08653	7.07868	7.09068	7.06416	7.06405	7.07114	7.0853	7.06645	0.957537	-0.0625995			1.95056	0.0117717	0.0188443	4.45473	A0FGR8	A0FGR8;H7BXI1;A0A087WXU3	ESYT2_HUMAN	Extended synaptotagmin-2
6.04163	6.03707	6.02518	6.00077	6.01368	6.0291	6.03463	6.01452	0.954751	-0.0668029			0.98769	0.0762042	0.0201095	2.10668	A0JLT2	A0JLT2;J3KR33	MED19_HUMAN	Mediator of RNA polymerase II transcription subunit 19
6.7951	6.73858	6.75372	6.7764	6.70088	6.77839	6.76247	6.75189	0.975937	-0.0351405			0.126705	0.864178	0.0105783	0.34574	A0PJW6	A0PJW6	TM223_HUMAN	Transmembrane protein 223
6.91345	6.88893	6.91153	6.89394	6.87653	6.89166	6.90464	6.88738	0.961039	-0.0573332			0.835483	0.107764	0.0172588	1.80108	A1L0T0	A1L0T0;M0R026	ILVBL_HUMAN	Acetolactate synthase-like protein
5.4999	5.38685	5.50328	5.44537	5.49957	5.52382	5.46334	5.48959	1.0623	0.0871973			0.229957	0.708003	-0.0262496	-0.586728	A1L170	A1L170;F8W6W0	CA226_HUMAN	Uncharacterized protein C1orf226
5.96294	6.00123	5.91713	6.02503	6.07006	6.01933	5.96043	6.03814	1.19594	0.258147			1.2524	0.0423268	-0.07771	-2.66797	A1L188	A1L188	NDUF8_HUMAN	NADH dehydrogenase [ubiquinone] 1 alpha subcomplex assembly factor 8
5.19717	5.18964	5.20776	NaN	5.23283	5.2427	5.19819	5.23776	1.0954	0.131462			1.84281	0.0147109	-0.0395741	-5.12782	A1L390	A1L390;G3V311	PKHG3_HUMAN	Pleckstrin homology domain-containing family G member 3
6.25414	6.31514	NaN	NaN	6.2167	6.16467	6.28464	6.19068	0.805466	-0.312105			0.842211	0.105739	0.0939531	2.34358	A2A5X0;A6PW57	A6PW57;A2A5X0	A2A5X0_HUMAN;A6PW57_HUMAN	Phosphatidylinositol 4-phosphate 5-kinase type-1 alpha (Fragment)
6.44957	6.48385	6.47867	6.46787	6.45761	6.46008	6.4707	6.46185	0.979843	-0.029378			0.3274	0.478616	0.00884342	0.796111	A2RRP1	A2RRP1;H0Y5G7;H7C007	NBAS_HUMAN	Neuroblastoma-amplified sequence
NaN	5.19616	NaN	4.49033	NaN	NaN	5.19616	4.49033	0.196867	-2.34471			0	1	0.705828	0	A2RU67	A2RU67;Q69YM1	F234B_HUMAN	Protein FAM234B
6.50863	6.50808	6.52955	6.52241	6.5385	6.52103	6.51542	6.52731	1.02776	0.0395055			0.588675	0.204075	-0.011892	-1.3183	A3KMH1	A3KMH1	VWA8_HUMAN	von Willebrand factor A domain-containing protein 8
5.8171	5.69212	5.72047	5.902	5.87019	5.77358	5.74323	5.84859	1.27456	0.350001			0.90979	0.0895884	-0.105361	-1.94908	A3KN83	A3KN83;Q9Y2G9;K7ES28	SBNO1_HUMAN	Protein strawberry notch homolog 1
6.35969	6.35613	6.29289	6.42745	6.48202	6.45895	6.33623	6.45614	1.31797	0.39832			1.95425	0.0116006	-0.119906	-4.46575	A4D1E9	A4D1E9	GTPBA_HUMAN	GTP-binding protein 10
5.60166	5.60071	5.59918	5.01393	NaN	5.16024	5.60052	5.08709	0.306598	-1.70558	+	D:\CHENYUWAN\20240212-dia-lumos\ddab-enps-1h-dia-label-fee\Blank-NPs-DIA-Label-free_D:\CHENYUWAN\20240212-dia-lumos\ddab-enps-1h-dia-label-fee\ddab-enps-1h-DIA-Label-free	2.59528	0.00461853	0.513431	9.41443	A4D1P6	A4D1P6;C9J1X0	WDR91_HUMAN	WD repeat-containing protein 91
5.88954	5.95307	5.94598	5.93557	5.89135	5.98347	5.92953	5.9368	1.01687	0.0241371			0.0766861	0.926305	-0.0072662	-0.217951	A5PLL7	A5PLL7;Q5TGE2;I3L0A0	TM189_HUMAN	Transmembrane protein 189
6.39035	6.42068	6.3984	6.35235	6.34162	6.34559	6.40314	6.34652	0.87776	-0.188102	+	D:\CHENYUWAN\20240212-dia-lumos\ddab-enps-1h-dia-label-fee\Blank-NPs-DIA-Label-free_D:\CHENYUWAN\20240212-dia-lumos\ddab-enps-1h-dia-label-fee\ddab-enps-1h-DIA-Label-free	2.38451	0.00594478	0.0566246	5.90126	A5YKK6	A5YKK6;H3BMZ2	CNOT1_HUMAN	CCR4-NOT transcription complex subunit 1
NaN	5.5622	NaN	5.57008	NaN	NaN	5.5622	5.57008	1.0183	0.0261635			0	1	-0.00787544	0	A6H8Y1	A6H8Y1;H7C5U4;A0A0G2JNU3	BDP1_HUMAN	Transcription factor TFIIIB component B'' homolog
6.69457	6.68769	6.61892	6.26285	6.28475	6.26738	6.66706	6.27166	0.402347	-1.31349	+	D:\CHENYUWAN\20240212-dia-lumos\ddab-enps-1h-dia-label-fee\Blank-NPs-DIA-Label-free_D:\CHENYUWAN\20240212-dia-lumos\ddab-enps-1h-dia-label-fee\ddab-enps-1h-DIA-Label-free	4.02587	0.000505119	0.3954	15.7805	A6NCE7;Q9GZQ8	A6NCE7;Q9GZQ8;Q9H492;H3BTL1	MLP3B_HUMAN;MP3B2_HUMAN	Microtubule-associated proteins 1A/1B light chain 3 beta 2
NaN	NaN	5.28034	5.38829	5.41067	5.39696	5.28034	5.39864	1.3131	0.392974			0	1	-0.118297	0	A6ND36	A6ND36	FA83G_HUMAN	Protein FAM83G
5.24101	5.58993	5.35556	5.63302	5.72007	5.58383	5.3955	5.64564	1.77886	0.830952			1.06739	0.063745	-0.250141	-2.27107	A6NDG6	A6NDG6	PGP_HUMAN	Glycerol-3-phosphate phosphatase
5.31118	5.43924	NaN	NaN	NaN	5.08218	5.37521	5.08218	0.509299	-0.973416			0	1	0.293027	0	A6NDU8	A6NDU8	CE051_HUMAN	UPF0600 protein C5orf51
6.23317	6.27306	6.25134	6.12508	NaN	6.1263	6.25252	6.12569	0.746741	-0.42132	+	D:\CHENYUWAN\20240212-dia-lumos\ddab-enps-1h-dia-label-fee\Blank-NPs-DIA-Label-free_D:\CHENYUWAN\20240212-dia-lumos\ddab-enps-1h-dia-label-fee\ddab-enps-1h-DIA-Label-free	2.46865	0.00524338	0.12683	8.51776	A6NEE1	A6NEE1	PLHD1_HUMAN	Pleckstrin homology domain-containing family D member 1
6.11678	6.10998	6.07513	6.14608	6.08722	6.04725	6.10063	6.09352	0.983751	-0.0236355			0.0797674	0.923332	0.00711489	0.226097	A6NEM2	A6NEM2	A6NEM2_HUMAN	Host cell factor 1
NaN	NaN	5.35162	NaN	5.3459	5.39052	5.35162	5.36821	1.03892	0.0550859			0	1	-0.016582	0	A6NFI3	A6NFI3	ZN316_HUMAN	Zinc finger protein 316
NaN	5.20015	5.22668	NaN	6.24394	6.26697	5.21342	6.25545	11.0163	3.46157	+	D:\CHENYUWAN\20240212-dia-lumos\ddab-enps-1h-dia-label-fee\Blank-NPs-DIA-Label-free_D:\CHENYUWAN\20240212-dia-lumos\ddab-enps-1h-dia-label-fee\ddab-enps-1h-DIA-Label-free	3.54664	0.000765	-1.04204	-59.3234	A6NGW2;Q7RTU9	Q7RTU9;A6NGW2;F5GXA4	STRCL_HUMAN;STRC_HUMAN	Putative stereocilin-like protein
6.83362	6.85498	6.86223	6.30264	6.31546	6.39929	6.85027	6.33913	0.308216	-1.69799	+	D:\CHENYUWAN\20240212-dia-lumos\ddab-enps-1h-dia-label-fee\Blank-NPs-DIA-Label-free_D:\CHENYUWAN\20240212-dia-lumos\ddab-enps-1h-dia-label-fee\ddab-enps-1h-DIA-Label-free	4.07359	0.000522046	0.511145	16.2258	A6NHL2	A6NHL2	TBAL3_HUMAN	Tubulin alpha chain-like 3
6.41636	6.40478	6.41169	6.40785	6.41552	6.41584	6.41094	6.41307	1.00491	0.00706906			0.19155	0.774493	-0.00212797	-0.499964	A6NHR9	A6NHR9;J3KTL8	SMHD1_HUMAN	Structural maintenance of chromosomes flexible hinge domain-containing protein 1
6.8218	6.85983	6.81395	6.80683	6.84095	6.82942	6.83186	6.82573	0.985986	-0.0203612			0.129747	0.86022	0.00612911	0.353235	A6NHS7	A6NHS7	MANS4_HUMAN	MANSC domain-containing protein 4
5.85578	5.8784	5.94522	5.75304	5.80722	5.70946	5.89313	5.75657	0.730196	-0.453644			1.60469	0.0211472	0.13656	3.50209	A6NJ78	A6NJ78;A0A0U1RR76	MET15_HUMAN	Probable methyltransferase-like protein 15
5.48896	5.45831	5.56857	5.40627	5.41679	5.43587	5.50528	5.41964	0.821041	-0.284474			1.18473	0.0478491	0.0856355	2.52004	A6NNN6	A6NNN6	A6NNN6_HUMAN	Pericentriolar material 1 protein
6.0538	6.05597	6.04813	5.87464	5.89105	5.81925	6.05264	5.86165	0.644189	-0.634445	+	D:\CHENYUWAN\20240212-dia-lumos\ddab-enps-1h-dia-label-fee\Blank-NPs-DIA-Label-free_D:\CHENYUWAN\20240212-dia-lumos\ddab-enps-1h-dia-label-fee\ddab-enps-1h-DIA-Label-free	3.02539	0.00231485	0.190987	8.74268	A6ZKI3	A6ZKI3;Q17RB0;Q9BWD3	F127A_HUMAN	Protein FAM127A
6.51008	6.50659	6.52175	6.48456	6.49461	6.49892	6.51281	6.4927	0.954756	-0.0667962			1.48941	0.0267962	0.0201077	3.21601	A8CG34	Q96HA1;A6NF01;A8CG34;A0A075B7F8;A0A087WY75	P121C_HUMAN	Nuclear envelope pore membrane protein POM 121C
NaN	5.09245	5.07691	5.39709	5.19266	5.3582	5.08468	5.31598	1.70333	0.768362			1.18685	0.0475602	-0.2313	-2.85139	A8MPP1;Q92771	Q96FC9;Q92771;A8MPP1;B4DMS8;F6WZM0;F5H235;C9K0E8;R4GNE1;F5GYY1;F5GXJ8;F5GXL6	D11L8_HUMAN;DDX12_HUMAN	Putative ATP-dependent RNA helicase DDX11-like protein 8
4.87358	4.86895	5.04127	NaN	NaN	4.37563	4.92793	4.37563	0.280344	-1.83473			0	1	0.552308	0	A8MQB8;G3V0J0	G3V0J0;A8MQB8	A8MQB8_HUMAN;G3V0J0_HUMAN	Synaptic functional regulator FMR1
NaN	4.82344	NaN	NaN	5.23616	5.07436	4.82344	5.15526	2.14694	1.10228			0	1	-0.33182	0	A8MW92	A8MW92;A0A0A0MQS0;F8W9L8	P20L1_HUMAN	PHD finger protein 20-like protein 1
7.44769	7.46679	7.45485	7.58334	7.58837	7.57432	7.45644	7.58201	1.33527	0.417129	+	D:\CHENYUWAN\20240212-dia-lumos\ddab-enps-1h-dia-label-fee\Blank-NPs-DIA-Label-free_D:\CHENYUWAN\20240212-dia-lumos\ddab-enps-1h-dia-label-fee\ddab-enps-1h-DIA-Label-free	4.26547	0.000285132	-0.125569	-18.1435	A8MWD9;P62308	P62308;A8MWD9;Q49AN9;F5H013;C9JVQ0	RUXGL_HUMAN;RUXG_HUMAN	Putative small nuclear ribonucleoprotein G-like protein 15
5.94031	6.05741	6.10193	6.16065	6.12007	6.1905	6.03322	6.15707	1.33001	0.411442			1.11276	0.0564852	-0.123856	-2.36628	A8MXV4	A8MXV4	NUD19_HUMAN	Nucleoside diphosphate-linked moiety X motif 19
5.26732	5.20736	5.19677	5.51763	5.44032	5.45897	5.22382	5.47231	1.77212	0.825474	+	D:\CHENYUWAN\20240212-dia-lumos\ddab-enps-1h-dia-label-fee\Blank-NPs-DIA-Label-free_D:\CHENYUWAN\20240212-dia-lumos\ddab-enps-1h-dia-label-fee\ddab-enps-1h-DIA-Label-free	2.82818	0.00331861	-0.248492	-7.76128	A9UHW6	A9UHW6;J3KSB8;J3QRZ6;J3QLJ5	MI4GD_HUMAN	MIF4G domain-containing protein
5.91946	6.01395	5.89928	NaN	5.92575	5.93066	5.94423	5.92821	0.963772	-0.0532356			0.125611	0.865399	0.0160255	0.350927	B0QY56	B0QY56	B0QY56_HUMAN	Josephin-1 (Fragment)
5.72121	5.7661	NaN	5.67427	NaN	5.73108	5.74366	5.70268	0.909956	-0.136131			0.425806	0.332003	0.0409789	1.13186	B0QZ43	B0QZ43	B0QZ43_HUMAN	Erlin-1 (Fragment)
5.70437	5.77116	5.47114	5.63653	5.70543	5.62451	5.64889	5.65549	1.01532	0.0219402			0.0233922	0.987951	-0.00660499	-0.0699883	B0YJ81	B0YJ81	HACD1_HUMAN	Very-long-chain (3R)-3-hydroxyacyl-CoA dehydratase 1
5.7914	5.66732	5.79324	5.59413	5.66141	5.69256	5.75065	5.64937	0.791984	-0.336456			0.932127	0.084867	0.101283	1.994	B1AHL2	B1AHL2	B1AHL2_HUMAN	Fibulin-1
6.71794	6.71818	6.72535	6.78432	6.76936	6.73236	6.72049	6.76201	1.10033	0.137941			1.2471	0.042777	-0.0415244	-2.65625	B1AK87;B1AK88	B1AK88;B1AK87	B1AK87_HUMAN;B1AK88_HUMAN	Capping protein (Actin filament) muscle Z-line, beta, isoform CRA_a
5.61143	5.6585	5.54313	5.65015	5.71318	5.52854	5.60436	5.63062	1.06235	0.0872527			0.154131	0.831215	-0.0262655	-0.412322	B1ALY0;C9JZH4	C9JZH4;B1ALY0	B1ALY0_HUMAN;C9JZH4_HUMAN	Protein PALM2-AKAP2 (Fragment)
7.02299	7.09339	7.04954	6.76768	6.83823	6.8506	7.0553	6.81884	0.580138	-0.785533	+	D:\CHENYUWAN\20240212-dia-lumos\ddab-enps-1h-dia-label-fee\Blank-NPs-DIA-Label-free_D:\CHENYUWAN\20240212-dia-lumos\ddab-enps-1h-dia-label-fee\ddab-enps-1h-DIA-Label-free	2.69764	0.00395933	0.236469	7.16736	B1ANS9	B1ANS9	WDR64_HUMAN	WD repeat-containing protein 64
6.36408	6.34275	6.39086	NaN	6.35378	6.33881	6.3659	6.34629	0.955869	-0.0651159			0.427066	0.33073	0.019602	1.04186	B3KSW4	B3KSW4	B3KSW4_HUMAN	Regulator of G-protein-signaling 20
6.20947	6.23568	6.19146	6.0815	6.01436	6.08222	6.21221	6.05936	0.70332	-0.507748	+	D:\CHENYUWAN\20240212-dia-lumos\ddab-enps-1h-dia-label-fee\Blank-NPs-DIA-Label-free_D:\CHENYUWAN\20240212-dia-lumos\ddab-enps-1h-dia-label-fee\ddab-enps-1h-DIA-Label-free	2.38419	0.00594121	0.152848	5.90009	B3KTM8;H0YLJ3;H0YMJ0	H0YLJ3;H0YMJ0;B3KTM8	B3KTM8_HUMAN;H0YLJ3_HUMAN;H0YMJ0_HUMAN	Mortality factor 4-like protein 1
6.76926	6.81083	6.79771	6.74043	6.7168	6.73317	6.7926	6.73013	0.866023	-0.207522			1.94058	0.0121092	0.0624706	4.42501	B4DY08	B2R5W2;B4DY08;G3V4C1;G3V4W0;G3V2D6;G3V5X6;G3V3K6;G3V251	B4DY08_HUMAN	Heterogeneous nuclear ribonucleoproteins C1/C2
5.45774	5.4558	5.36911	5.52014	5.50684	5.57837	5.42755	5.53512	1.28105	0.357325			1.37375	0.0343606	-0.107565	-2.94233	B5MCW3	B5MCW3	B5MCW3_HUMAN	Bromodomain-containing protein 8
5.11817	5.15897	5.0393	5.05741	5.04841	5.07733	5.10547	5.06105	0.902768	-0.147572			0.542964	0.231323	0.0444241	1.22896	B7Z4L1;B7Z4U3;E7EPD9;E7EPW5;E9PCV1;G3XAH9;H7BXS2	G3XAH9;B7Z4L1;B7Z4U3;E9PCV1;E7EPW5;E7EPD9;H7BXS2	B7Z4L1_HUMAN;B7Z4U3_HUMAN;E7EPD9_HUMAN;E7EPW5_HUMAN;E9PCV1_HUMAN;G3XAH9_HUMAN;H7BXS2_HUMAN	Suppression of tumorigenicity 7, isoform CRA_d
7.01854	6.98189	7.00807	7.07168	7.04331	7.07497	7.00283	7.06332	1.14945	0.200939			1.82096	0.0153224	-0.0604887	-4.07969	B7Z4M1	B7Z4M1	B7Z4M1_HUMAN	Reticulon
5.64137	5.69105	5.60502	5.63094	5.51076	5.62209	5.64582	5.58793	0.87522	-0.192282			0.557808	0.222733	0.0578829	1.25801	B7Z645	B7Z645;H0YAA0	B7Z645_HUMAN	Heterogeneous nuclear ribonucleoprotein Q
5.43964	5.52968	5.42663	5.45874	5.36581	5.37338	5.46532	5.39931	0.858996	-0.219277			0.681761	0.157726	0.0660092	1.49966	B7Z8L1;F8VP48;F8WF16	F8WF16;B7Z8L1;F8VP48	B7Z8L1_HUMAN;F8VP48_HUMAN;F8WF16_HUMAN	Periphilin-1
6.31998	6.34502	6.33073	5.76459	5.82023	NaN	6.33191	5.79241	0.288737	-1.79217	+	D:\CHENYUWAN\20240212-dia-lumos\ddab-enps-1h-dia-label-fee\Blank-NPs-DIA-Label-free_D:\CHENYUWAN\20240212-dia-lumos\ddab-enps-1h-dia-label-fee\ddab-enps-1h-DIA-Label-free	3.78427	0.000423462	0.539498	23.7131	B7Z9C2;F8VRJ2;F8VV59;F8W118	B7Z9C2;F8W118;F8VV59;F8VRJ2	B7Z9C2_HUMAN;F8VRJ2_HUMAN;F8VV59_HUMAN;F8W118_HUMAN	Nucleosome assembly protein 1-like 1
6.49997	6.4946	6.52256	6.38991	6.41057	6.37411	6.50571	6.39153	0.768811	-0.379299	+	D:\CHENYUWAN\20240212-dia-lumos\ddab-enps-1h-dia-label-fee\Blank-NPs-DIA-Label-free_D:\CHENYUWAN\20240212-dia-lumos\ddab-enps-1h-dia-label-fee\ddab-enps-1h-DIA-Label-free	2.95884	0.00270869	0.11418	8.39955	B7ZAQ6;P0CG08	B7ZAQ6;P0CG08	GPHRA_HUMAN;GPHRB_HUMAN	Golgi pH regulator A
6.22635	6.19977	6.20382	6.26686	6.23798	6.22597	6.20998	6.2436	1.0805	0.111697			1.07645	0.0629398	-0.0336235	-2.28999	B7ZKQ9	B7ZKQ9	B7ZKQ9_HUMAN	SCARB1 protein
6.42898	6.39153	6.36546	6.39885	6.41897	6.3902	6.39532	6.40267	1.01706	0.0244117			0.133264	0.85754	-0.00734886	-0.361865	B8ZZA8;B8ZZC5	B8ZZA8;B8ZZC5	B8ZZA8_HUMAN;B8ZZC5_HUMAN	Glutaminase kidney isoform, mitochondrial
6.16167	6.16892	6.21579	5.51828	5.52057	5.42281	6.18213	5.48722	0.20188	-2.30843	+	D:\CHENYUWAN\20240212-dia-lumos\ddab-enps-1h-dia-label-fee\Blank-NPs-DIA-Label-free_D:\CHENYUWAN\20240212-dia-lumos\ddab-enps-1h-dia-label-fee\ddab-enps-1h-DIA-Label-free	4.35275	0.000305677	0.694906	19.0875	C9J0J7;G5E9Q6	G5E9Q6;C9J0J7	C9J0J7_HUMAN;G5E9Q6_HUMAN	Profilin
6.26718	6.33731	6.31111	6.07056	6.1245	6.03174	6.3052	6.0756	0.589387	-0.762714	+	D:\CHENYUWAN\20240212-dia-lumos\ddab-enps-1h-dia-label-fee\Blank-NPs-DIA-Label-free_D:\CHENYUWAN\20240212-dia-lumos\ddab-enps-1h-dia-label-fee\ddab-enps-1h-DIA-Label-free	2.61074	0.00451029	0.2296	6.79456	C9J2Z7;C9K073;E7EUU4;E7EX73;E9PGM1	E7EX73;C9J2Z7;C9K073;E7EUU4;E9PGM1	C9J2Z7_HUMAN;C9K073_HUMAN;E7EUU4_HUMAN;E7EX73_HUMAN;E9PGM1_HUMAN	Eukaryotic translation initiation factor 4 gamma 1 (Fragment)
5.96188	NaN	NaN	5.98801	6.00098	6.06754	5.96188	6.01884	1.14015	0.189228			0	1	-0.0569634	0	C9JI87	C9JI87	C9JI87_HUMAN	Voltage-dependent anion-selective channel protein 1 (Fragment)
6.45759	6.4363	6.33419	6.28772	6.3478	6.30917	6.40936	6.31489	0.80451	-0.313817			1.05831	0.0649166	0.0944686	2.25216	C9JRZ8;O60218	C9JRZ8;O60218	AK1BA_HUMAN;AK1BF_HUMAN	Aldo-keto reductase family 1 member B15
6.68424	6.71094	6.57436	6.83911	6.87216	6.83796	6.65651	6.84974	1.56038	0.641897			1.95415	0.0115951	-0.19323	-4.46545	C9JSZ1	C9JSZ1	C9JSZ1_HUMAN	Far upstream element-binding protein 1 (Fragment)
7.51776	7.5449	7.50201	7.57043	7.52989	7.52946	7.52156	7.54326	1.05123	0.0720836			0.515071	0.250079	-0.0216994	-1.17422	D6R9P3;D6RBZ0;D6RD18	D6R9P3;D6RD18;D6RBZ0	D6R9P3_HUMAN;D6RBZ0_HUMAN;D6RD18_HUMAN	Heterogeneous nuclear ribonucleoprotein A/B
5.79364	5.86238	5.83515	5.69635	NaN	NaN	5.83039	5.69635	0.734445	-0.445275			0	1	0.134041	0	E5RFR7	E5RFR7	E5RFR7_HUMAN	Tumor protein D52
6.15357	5.98905	6.16747	6.11519	6.12941	6.11451	6.10336	6.1197	1.03834	0.0542792			0.10216	0.896162	-0.0163399	-0.284164	E5RGW4	E5RGW4	E5RGW4_HUMAN	Nucleophosmin (Fragment)
7.22427	7.16063	7.2241	7.16017	7.18198	7.20175	7.203	7.1813	0.95127	-0.0720726			0.373364	0.399557	0.0216958	0.890984	E5RK97	E5RK97	E5RK97_HUMAN	Cytoplasmic dynein 2 light intermediate chain 1
5.92667	5.93309	5.93061	5.91885	5.98433	5.95116	5.93012	5.95145	1.05032	0.0708313			0.488836	0.271241	-0.0213219	-1.12252	E7EQT4	E7EQT4	E7EQT4_HUMAN	Apoptotic chromatin condensation inducer in the nucleus
4.97448	NaN	5.01007	4.97425	4.97079	4.9794	4.99227	4.97481	0.960589	-0.0580092			0.536457	0.235022	0.0174622	1.2793	E7ERH1	E7ERH1	E7ERH1_HUMAN	Tensin-1 (Fragment)
5.21437	5.16802	5.13781	5.09244	5.10665	5.16972	5.1734	5.12294	0.890295	-0.167644			0.707777	0.147981	0.0504657	1.55039	E7ERI8;E7EW49	E7ERI8;E7EW49	E7ERI8_HUMAN;E7EW49_HUMAN	CLIP-associating protein 2
6.43533	6.47515	6.45469	6.49482	6.54572	6.52247	6.45506	6.521	1.16398	0.219061			1.61627	0.0210842	-0.0659437	-3.53161	E7ETY2	E7ETY2;H0Y8Y7	E7ETY2_HUMAN	Treacle protein
5.55648	5.41745	5.29449	4.80492	NaN	4.81458	5.42281	4.80975	0.24375	-2.03653	+	D:\CHENYUWAN\20240212-dia-lumos\ddab-enps-1h-dia-label-fee\Blank-NPs-DIA-Label-free_D:\CHENYUWAN\20240212-dia-lumos\ddab-enps-1h-dia-label-fee\ddab-enps-1h-DIA-Label-free	2.08687	0.00920835	0.613055	6.27069	E7EVA0	B5MEG9;E7EVA0	E7EVA0_HUMAN	Microtubule-associated protein
6.10206	6.08055	6.07699	6.03432	6.08948	6.04629	6.08653	6.0567	0.933613	-0.0991042			0.740006	0.135909	0.0298332	1.61334	E7EX70	E7EX70	E7EX70_HUMAN	DNA-directed RNA polymerase I subunit RPA49
6.8306	6.86618	6.85694	6.61012	6.6126	6.64696	6.85124	6.62323	0.591544	-0.757443	+	D:\CHENYUWAN\20240212-dia-lumos\ddab-enps-1h-dia-label-fee\Blank-NPs-DIA-Label-free_D:\CHENYUWAN\20240212-dia-lumos\ddab-enps-1h-dia-label-fee\ddab-enps-1h-DIA-Label-free	3.85475	0.000441133	0.228013	14.2794	E9PAV3	Q13765;E9PAV3;F8W1N5;F8W0W4;F8VZJ2;F8VNW4;H0YHX9	NACAM_HUMAN	Nascent polypeptide-associated complex subunit alpha, muscle-specific form
6.56076	6.52139	6.59661	6.62835	6.65782	6.61979	6.55958	6.63532	1.19052	0.251597			1.43285	0.0309102	-0.0757383	-3.0806	E9PGZ1	E7EX44;E9PGZ1	E9PGZ1_HUMAN	Caldesmon
6.73462	6.79318	6.7926	6.5884	6.55069	6.57709	6.77346	6.57206	0.628923	-0.669044	+	D:\CHENYUWAN\20240212-dia-lumos\ddab-enps-1h-dia-label-fee\Blank-NPs-DIA-Label-free_D:\CHENYUWAN\20240212-dia-lumos\ddab-enps-1h-dia-label-fee\ddab-enps-1h-DIA-Label-free	3.0716	0.00231579	0.201403	8.98846	E9PK54	E9PK54	E9PK54_HUMAN	Heat shock cognate 71 kDa protein (Fragment)
5.49512	5.47774	5.47141	5.53035	5.48153	5.56275	5.48142	5.52487	1.10523	0.144344			0.816217	0.112643	-0.0434526	-1.76301	E9PK91;H0YF63	E9PK91;H0YF63	E9PK91_HUMAN;H0YF63_HUMAN	Bcl-2-associated transcription factor 1
6.38268	6.37754	6.35208	6.39219	6.35539	NaN	6.37076	6.37379	1.00699	0.0100499			0.0557077	0.949881	-0.00302585	-0.164752	E9PKP7	E9PKP7	E9PKP7_HUMAN	Nucleolar transcription factor 1
6.46707	6.45051	6.47678	6.39884	6.37522	6.36463	6.46479	6.37957	0.821826	-0.283096	+	D:\CHENYUWAN\20240212-dia-lumos\ddab-enps-1h-dia-label-fee\Blank-NPs-DIA-Label-free_D:\CHENYUWAN\20240212-dia-lumos\ddab-enps-1h-dia-label-fee\ddab-enps-1h-DIA-Label-free	2.59154	0.00459973	0.0852205	6.71447	E9PKU7;E9PNH1	E9PKU7;E9PNH1	E9PKU7_HUMAN;E9PNH1_HUMAN	Neutral alpha-glucosidase AB
6.29909	6.31984	6.2768	6.19644	6.16955	6.18573	6.29858	6.18391	0.767942	-0.38093	+	D:\CHENYUWAN\20240212-dia-lumos\ddab-enps-1h-dia-label-fee\Blank-NPs-DIA-Label-free_D:\CHENYUWAN\20240212-dia-lumos\ddab-enps-1h-dia-label-fee\ddab-enps-1h-DIA-Label-free	2.83869	0.00325456	0.114672	7.81095	E9PLR3	E9PLR3	E9PLR3_HUMAN	Proteoglycan 4 (Fragment)
6.6053	6.61621	6.58577	6.70155	6.67075	6.7031	6.60242	6.6918	1.22851	0.296905	+	D:\CHENYUWAN\20240212-dia-lumos\ddab-enps-1h-dia-label-fee\Blank-NPs-DIA-Label-free_D:\CHENYUWAN\20240212-dia-lumos\ddab-enps-1h-dia-label-fee\ddab-enps-1h-DIA-Label-free	2.53386	0.0052356	-0.0893776	-6.4789	E9PMP7	F8WD26;E9PMP7	E9PMP7_HUMAN	LIM domain only protein 7 (Fragment)
4.71469	4.59619	4.50737	4.3909	4.35327	NaN	4.60608	4.37209	0.58345	-0.777319			1.22869	0.0437231	0.233997	2.97013	E9PMV1	E9PMV1	E9PMV1_HUMAN	Plectin (Fragment)
6.69884	6.71593	6.69218	6.67156	6.74518	6.74353	6.70232	6.72009	1.04177	0.0590362			0.28334	0.585824	-0.017772	-0.703054	E9PRG8	E9PRG8;A0A0B4J220;E9PLD3	CK098_HUMAN	Uncharacterized protein C11orf98
5.91577	5.93477	5.94367	5.82639	5.86935	5.77024	5.9314	5.82199	0.777298	-0.363461			1.66789	0.0191041	0.109413	3.66509	F1T0I1;J3KNL6	F1T0I1;J3KNL6	F1T0I1_HUMAN;J3KNL6_HUMAN	Protein transport protein Sec16A
6.39444	6.33944	6.3678	6.46772	6.43881	6.39578	6.36723	6.4341	1.16647	0.222154			1.19748	0.0465007	-0.0668748	-2.54765	F5GX99;F5H7A5	F5GX99;F5H7A5	F5GX99_HUMAN;F5H7A5_HUMAN	Caseinolytic peptidase B protein homolog
6.81613	6.85591	6.82163	6.83712	6.86073	6.83256	6.83122	6.84347	1.0286	0.040687			0.332013	0.468473	-0.0122479	-0.805725	F5H867	F5H867	F5H867_HUMAN	4F2 cell-surface antigen heavy chain (Fragment)
6.76789	6.77431	6.76812	6.78943	6.7535	6.80511	6.77011	6.78268	1.02937	0.0417644			0.336615	0.459937	-0.0125723	-0.815294	F6RGN5	F6RGN5	F6RGN5_HUMAN	Mitochondrial dicarboxylate carrier
6.39268	NaN	6.37448	NaN	6.37485	6.53561	6.38358	6.45523	1.17937	0.238013			0.328631	0.476153	-0.0716491	-0.885716	F8VR39	F8VR39	F8VR39_HUMAN	Egl nine homolog 3
7.01554	6.90226	7.01167	6.7059	6.75023	6.59656	6.97649	6.68423	0.5102	-0.970866	+	D:\CHENYUWAN\20240212-dia-lumos\ddab-enps-1h-dia-label-fee\Blank-NPs-DIA-Label-free_D:\CHENYUWAN\20240212-dia-lumos\ddab-enps-1h-dia-label-fee\ddab-enps-1h-DIA-Label-free	2.11493	0.00886352	0.29226	4.96572	F8VRH0	P57721;E9PFP8;F8VRH0	F8VRH0_HUMAN	Poly(rC)-binding protein 2 (Fragment)
5.82354	5.86503	5.85223	5.79533	5.78477	5.8335	5.84693	5.80453	0.906982	-0.140854			1.03593	0.068185	0.0424018	2.20576	F8VU51;H0YIQ2	H0YIQ2;F8VU51	F8VU51_HUMAN;H0YIQ2_HUMAN	YLP motif-containing protein 1
6.04889	6.05195	6.04298	6.14045	6.15019	6.08852	6.04794	6.12639	1.19797	0.260592			1.81408	0.0154549	-0.0784464	-4.06041	F8VV04	F8VV04	F8VV04_HUMAN	Squamous cell carcinoma antigen recognized by T-cells 3 (Fragment)
6.22227	6.20141	6.22983	6.10243	6.0296	6.00577	6.21784	6.04594	0.67313	-0.571043	+	D:\CHENYUWAN\20240212-dia-lumos\ddab-enps-1h-dia-label-fee\Blank-NPs-DIA-Label-free_D:\CHENYUWAN\20240212-dia-lumos\ddab-enps-1h-dia-label-fee\ddab-enps-1h-DIA-Label-free	2.32264	0.00635731	0.171901	5.67494	F8VXU5	F8VXU5	F8VXU5_HUMAN	Vacuolar protein sorting-associated protein 29
5.25362	5.52291	NaN	5.21091	NaN	5.10843	5.38826	5.15967	0.590754	-0.759371			0.596066	0.200527	0.228593	1.58674	F8VZX2	F8VZX2;H3BRU6	F8VZX2_HUMAN	Poly(rC)-binding protein 2
6.06231	6.01441	6.06946	6.03341	6.02948	6.00542	6.04873	6.02277	0.941981	-0.0862306			0.599793	0.198273	0.0259581	1.33998	F8W0Q9	F8W0Q9	F8W0Q9_HUMAN	Periphilin-1
6.43515	6.46087	6.45706	6.43208	6.41707	6.42324	6.45103	6.42413	0.939944	-0.0893532			1.3766	0.0341116	0.0268982	2.94893	F8W1P7	F8W1P7	F8W1P7_HUMAN	Natural resistance-associated macrophage protein 2
6.74052	6.74978	6.76769	6.33863	6.27092	6.26762	6.75266	6.29239	0.34652	-1.52899	+	D:\CHENYUWAN\20240212-dia-lumos\ddab-enps-1h-dia-label-fee\Blank-NPs-DIA-Label-free_D:\CHENYUWAN\20240212-dia-lumos\ddab-enps-1h-dia-label-fee\ddab-enps-1h-DIA-Label-free	4.32699	0.000299786	0.460272	18.804	F8W7C6	F8W7C6	F8W7C6_HUMAN	60S ribosomal protein L10
7.31794	7.361	7.3325	7.35729	7.29101	7.2883	7.33715	7.3122	0.944167	-0.0828854			0.409723	0.351778	0.0249511	0.964771	F8W914	F8W914	F8W914_HUMAN	Reticulon
5.77854	5.81463	5.70926	5.79613	5.82182	5.86858	5.76748	5.82884	1.15176	0.203846			0.751944	0.132033	-0.0613635	-1.6367	F8WEQ5;H7BXF4;H7C2E2	H7BXF4;F8WEQ5;H7C2E2	F8WEQ5_HUMAN;H7BXF4_HUMAN;H7C2E2_HUMAN	Sphingomyelin phosphodiesterase 4
6.11117	6.18692	6.12348	5.95133	6.05705	6.1388	6.14052	6.04906	0.810092	-0.303842			0.706077	0.148766	0.0914656	1.54707	G5EA09	G5EA09	G5EA09_HUMAN	Syndecan binding protein (Syntenin), isoform CRA_a
5.60605	5.51507	5.6862	5.65885	5.71304	5.62295	5.60244	5.66495	1.1548	0.207638			0.486224	0.273844	-0.0625049	-1.11736	G5EA36;I3L328	G5EA36;I3L328	G5EA36_HUMAN;I3L328_HUMAN	Cell division cycle 27, isoform CRA_c
5.34235	5.48824	5.43519	5.05372	NaN	NaN	5.42193	5.05372	0.428345	-1.22315			0	1	0.368206	0	G8JLD5	G8JLD5	G8JLD5_HUMAN	Dynamin-1-like protein
5.69776	5.61853	5.54457	NaN	NaN	5.59716	5.62028	5.59716	0.948146	-0.0768196			0	1	0.0231255	0	H0Y2S1	H0Y2S1	H0Y2S1_HUMAN	Putative GTP-binding protein 6
6.65566	6.60418	6.71445	6.42536	6.4828	6.49999	6.65809	6.46938	0.647571	-0.626889	+	D:\CHENYUWAN\20240212-dia-lumos\ddab-enps-1h-dia-label-fee\Blank-NPs-DIA-Label-free_D:\CHENYUWAN\20240212-dia-lumos\ddab-enps-1h-dia-label-fee\ddab-enps-1h-DIA-Label-free	2.07382	0.00948148	0.188712	4.83398	H0Y5F5;H0Y6X6	H0Y5F5;H0Y6X6	H0Y5F5_HUMAN;H0Y6X6_HUMAN	Polyadenylate-binding protein (Fragment)
5.80306	5.80056	5.74312	NaN	NaN	5.7428	5.78225	5.7428	0.913168	-0.131048			0	1	0.0394489	0	H0Y742	H0Y742	H0Y742_HUMAN	SUN domain-containing protein 1 (Fragment)
5.98395	5.95171	5.82343	5.72106	5.56738	5.6092	5.9197	5.63255	0.516234	-0.953902			1.89012	0.0133057	0.287153	4.27692	H0Y8H4	Q96PU5;H0Y8H4	H0Y8H4_HUMAN	E3 ubiquitin-protein ligase NEDD4 (Fragment)
NaN	6.48277	NaN	6.47095	6.50328	6.42412	6.48277	6.46612	0.962384	-0.0553156			0	1	0.0166512	0	H0YA96	H0YA96	H0YA96_HUMAN	Heterogeneous nuclear ribonucleoprotein D0 (Fragment)
5.75197	5.71499	5.67379	5.49418	5.56649	5.56219	5.71359	5.54096	0.672003	-0.57346	+	D:\CHENYUWAN\20240212-dia-lumos\ddab-enps-1h-dia-label-fee\Blank-NPs-DIA-Label-free_D:\CHENYUWAN\20240212-dia-lumos\ddab-enps-1h-dia-label-fee\ddab-enps-1h-DIA-Label-free	2.21749	0.00723321	0.172628	5.3065	H0YC97;H0YDK8;Q5T1Z4;Q5T1Z8	Q5T1Z8;Q5T1Z4;H0YDK8;H0YC97	H0YC97_HUMAN;H0YDK8_HUMAN;Q5T1Z4_HUMAN;Q5T1Z8_HUMAN	Pumilio homolog 1 (Fragment)
5.40444	5.38248	5.31382	5.47935	5.29938	5.38758	5.36691	5.38877	1.05162	0.0726085			0.137593	0.852782	-0.0218574	-0.372436	H0YCK3	H0YCK3	H0YCK3_HUMAN	Double-stranded RNA-specific adenosine deaminase (Fragment)
5.50251	5.48502	5.47118	5.54073	5.54697	5.54607	5.48624	5.54459	1.14381	0.193846	+	D:\CHENYUWAN\20240212-dia-lumos\ddab-enps-1h-dia-label-fee\Blank-NPs-DIA-Label-free_D:\CHENYUWAN\20240212-dia-lumos\ddab-enps-1h-dia-label-fee\ddab-enps-1h-DIA-Label-free	2.48691	0.00523586	-0.0583536	-6.29238	H0YFM9	H0YFM9	H0YFM9_HUMAN	Phosphatidylinositol N-acetylglucosaminyltransferase subunit Q (Fragment)
6.01466	6.09512	6.10282	6.00325	5.9824	5.99771	6.07086	5.99445	0.838667	-0.25383			1.24259	0.0430381	0.0764105	2.64631	H0YG38	H0YG38	H0YG38_HUMAN	Pre-mRNA-processing factor 40 homolog A (Fragment)
6.14552	6.15325	NaN	NaN	5.9645	NaN	6.14939	5.9645	0.653297	-0.61419			0	1	0.184889	0	H0YIZ1	H0YIZ1	H0YIZ1_HUMAN	Epididymal secretory protein E1 (Fragment)
6.39801	6.40436	6.39925	6.38657	6.32956	6.29075	6.40054	6.33563	0.86117	-0.215631			1.09417	0.0595574	0.0649117	2.32711	H0YJA2	H0YJA2	H0YJA2_HUMAN	Zinc finger CCCH domain-containing protein 14 (Fragment)
6.05852	5.99157	6.01715	6.04603	6.06822	6.09274	6.02241	6.069	1.11322	0.154741			0.917355	0.0881897	-0.0465816	-1.96427	H3BPE1;H3BQK9	H3BQK9;H3BPE1	H3BPE1_HUMAN;H3BQK9_HUMAN	Microtubule-actin cross-linking factor 1, isoforms 1/2/3/5
6.09012	5.88331	6.12696	6.00419	5.8998	5.98179	6.03346	5.96193	0.848138	-0.23763			0.363256	0.414002	0.0715332	0.870286	H3BR70;H3BTN5	H3BTN5;H3BR70	H3BR70_HUMAN;H3BTN5_HUMAN	Pyruvate kinase
5.84249	5.86744	5.91684	5.84991	5.81459	5.78204	5.87559	5.81552	0.870817	-0.199558			0.958234	0.0807433	0.0600731	2.04676	H3BUB6	H3BUB6	H3BUB6_HUMAN	Secretory carrier-associated membrane protein 2 (Fragment)
6.15173	NaN	5.99119	NaN	6.01083	6.2435	6.07146	6.12717	1.13686	0.185056			0.135767	0.855043	-0.0557077	-0.39414	H7BXI0	H7BXI0	H7BXI0_HUMAN	Copine-9 (Fragment)
6.61241	6.60232	6.61261	6.5828	6.55649	6.6208	6.60911	6.5867	0.949699	-0.0744577			0.518661	0.247575	0.0224137	1.18128	H7BXI1	H7BXI1	H7BXI1_HUMAN	Extended synaptotagmin-2 (Fragment)
6.99994	6.98521	6.97882	7.00391	6.98707	6.98349	6.98799	6.99149	1.00809	0.0116245			0.146662	0.840927	-0.00349935	-0.394403	H7BYY1	H7BYY1;B7Z596;F5H7S3;H0YK48;H0YN06	H7BYY1_HUMAN	Tropomyosin 1 (Alpha), isoform CRA_m
7.2339	7.2529	7.27109	7.08539	6.99579	7.06569	7.25263	7.04896	0.62564	-0.676595	+	D:\CHENYUWAN\20240212-dia-lumos\ddab-enps-1h-dia-label-fee\Blank-NPs-DIA-Label-free_D:\CHENYUWAN\20240212-dia-lumos\ddab-enps-1h-dia-label-fee\ddab-enps-1h-DIA-Label-free	2.65169	0.0040561	0.203676	6.96806	H7BZJ3	H7BZJ3	H7BZJ3_HUMAN	Protein disulfide-isomerase A3 (Fragment)
NaN	5.58181	5.56621	5.47444	5.48721	5.55258	5.57401	5.50474	0.852576	-0.2301			0.930453	0.0852499	0.0692674	2.17983	H7C0G1	H7C0G1	H7C0G1_HUMAN	Transmembrane protein 245 (Fragment)
5.83828	5.83474	5.84269	5.86991	5.82679	5.76042	5.83857	5.81904	0.95603	-0.0648728			0.241235	0.686011	0.0195287	0.611682	H7C0J3	H7C3H7;H7C0J3	H7C0J3_HUMAN	Chromodomain-helicase-DNA-binding protein 3 (Fragment)
6.33546	6.34807	6.35964	6.33563	6.31469	6.35234	6.34772	6.33422	0.96939	-0.0448505			0.449105	0.307108	0.0135016	1.0437	H7C0N4	H7C561;H7C0N4	H7C0N4_HUMAN	Splicing factor 1 (Fragment)
5.89317	6.01466	5.89256	5.87031	5.88936	5.74992	5.93346	5.83653	0.799958	-0.322003			0.746475	0.133852	0.0969329	1.626	H7C1M2	H7C1M2	H7C1M2_HUMAN	Protein SON (Fragment)
5.40354	5.47096	5.28583	5.51337	5.45534	5.40888	5.38678	5.45919	1.18144	0.24055			0.512191	0.252	-0.0724128	-1.16856	H7C3C4	H7C3C4	H7C3C4_HUMAN	Anion exchange protein (Fragment)
5.21176	4.87968	5.31733	5.29225	5.31721	5.10634	5.13626	5.2386	1.26574	0.339982			0.278635	0.598529	-0.102345	-0.692973	H7C4G8	H7C4G8	H7C4G8_HUMAN	5'-nucleotidase domain-containing protein 2 (Fragment)
5.60662	5.66604	NaN	5.69611	5.82248	5.6836	5.63633	5.73406	1.25236	0.324654			0.67845	0.15922	-0.0977304	-1.59176	I3L0M3;I3L4Y2	I3L0M3;I3L4Y2	I3L0M3_HUMAN;I3L4Y2_HUMAN	MYC-associated zinc finger protein (Purine-binding transcription factor), isoform CRA_e
6.36313	6.33035	6.32613	6.34955	6.36687	6.39545	6.33987	6.37062	1.07338	0.102164			0.799618	0.116399	-0.0307542	-1.73029	I3L168;I3L204;I3L3F5;I3L3Y6;I3L4D4	I3L204;I3L4D4;I3L3Y6;I3L168;I3L3F5	I3L168_HUMAN;I3L204_HUMAN;I3L3F5_HUMAN;I3L3Y6_HUMAN;I3L4D4_HUMAN	Unconventional myosin-Ic (Fragment)
5.13124	NaN	NaN	NaN	NaN	5.57536	5.13124	5.57536	2.78046	1.47532			0	1	-0.444117	0	I3L2J0	I3L2J0	I3L2J0_HUMAN	Protein capicua homolog
6.5691	6.64046	6.55187	6.65282	6.51156	6.58826	6.58714	6.58421	0.993283	-0.00972328			0.0198833	0.990757	0.00292683	0.0597119	J3KN66	J3KN66	J3KN66_HUMAN	Torsin-1A-interacting protein 1
NaN	6.45142	6.39791	6.36769	NaN	NaN	6.42467	6.36769	0.877053	-0.189264			0	1	0.0569744	0	J3KNI2	J3KNI2	J3KNI2_HUMAN	UPF0598 protein C8orf82
5.03541	5.11102	5.08383	5.17462	NaN	5.0921	5.07675	5.13336	1.13922	0.18805			0.568491	0.215928	-0.0566088	-1.34912	J3KNZ9	J3KNZ9	J3KNZ9_HUMAN	Probable fibrosin-1
6.7238	6.74963	6.72851	6.71884	6.71621	6.7307	6.73398	6.72192	0.972604	-0.0400757			0.591995	0.202584	0.0120638	1.32477	J3KQL8	J3KQL8	J3KQL8_HUMAN	Apolipoprotein L2
5.83558	5.88502	5.85638	6.06852	6.04076	6.05267	5.85899	6.05398	1.56672	0.647744	+	D:\CHENYUWAN\20240212-dia-lumos\ddab-enps-1h-dia-label-fee\Blank-NPs-DIA-Label-free_D:\CHENYUWAN\20240212-dia-lumos\ddab-enps-1h-dia-label-fee\ddab-enps-1h-DIA-Label-free	3.53938	0.000851485	-0.194991	-11.8662	K7EJB5	K7EJB5	K7EJB5_HUMAN	Small nuclear ribonucleoprotein Sm D2
NaN	NaN	5.57612	5.63141	5.57095	NaN	5.57612	5.60118	1.0594	0.0832475			0	1	-0.0250602	0	K7EK60	K7EK60	K7EK60_HUMAN	Formin-like protein 1
5.87988	5.87288	5.85091	5.90114	5.8415	5.90442	5.86789	5.88235	1.03387	0.0480484			0.259013	0.645482	-0.0144644	-0.650589	K7ELC2	K7ELC2	K7ELC2_HUMAN	40S ribosomal protein S15
5.84921	5.71404	5.66804	5.57688	5.76708	5.70971	5.74376	5.68456	0.872559	-0.196676			0.308389	0.524084	0.0592051	0.756243	K7EM38	K7EM38	K7EM38_HUMAN	Actin, cytoplasmic 2 (Fragment)
NaN	6.73982	6.84262	6.84539	6.79712	6.80196	6.79122	6.81483	1.05586	0.0784252			0.206051	0.752919	-0.0236082	-0.547353	L0R6Q1	L0R6Q1	L0R6Q1_HUMAN	Alternative protein SLC35A4
6.54405	6.59078	6.66955	6.56453	6.55567	6.65897	6.60146	6.59305	0.980837	-0.0279142			0.0589772	0.946448	0.0084033	0.170332	L0R8F8	L0R8F8	L0R8F8_HUMAN	Alternative protein SMCR7L
6.54347	6.59677	6.59125	6.59547	6.60367	6.63072	6.57716	6.60995	1.07842	0.108923			0.753671	0.131581	-0.0327888	-1.64008	M0QXA7	B9EGQ5;M0QXA7	M0QXA7_HUMAN	Protein Wiz
6.16005	6.12263	6.15951	6.22624	6.10285	6.2569	6.1474	6.19533	1.11669	0.159232			0.419592	0.339475	-0.0479334	-0.984639	M0QYH7	M0QYH7	M0QYH7_HUMAN	Prostate tumor-overexpressed gene 1 protein (Fragment)
5.51502	5.57242	5.47332	5.58386	5.54221	5.41738	5.52025	5.51448	0.986799	-0.019172			0.0338029	0.976705	0.005771	0.100051	M0QYZ1	M0QYZ1	M0QYZ1_HUMAN	Lysosomal alpha-mannosidase (Fragment)
6.6512	6.689	6.67303	6.61764	6.62132	6.60648	6.67108	6.61515	0.87917	-0.185787	+	D:\CHENYUWAN\20240212-dia-lumos\ddab-enps-1h-dia-label-fee\Blank-NPs-DIA-Label-free_D:\CHENYUWAN\20240212-dia-lumos\ddab-enps-1h-dia-label-fee\ddab-enps-1h-DIA-Label-free	2.04002	0.0098003	0.0559273	4.72767	M0QZM1	M0QZM1	M0QZM1_HUMAN	Heterogeneous nuclear ribonucleoprotein M (Fragment)
7.02209	7.01309	6.99924	7.0151	7.0098	7.00747	7.01147	7.01079	0.998426	-0.00227331			0.0329297	0.977864	0.000684579	0.097553	O00115	O00115;K7ENE5	DNS2A_HUMAN	Deoxyribonuclease-2-alpha
7.14028	7.144	7.14743	7.13246	7.13354	7.14384	7.1439	7.13662	0.983368	-0.0241969			0.80715	0.114838	0.00728369	1.74513	O00116	O00116;A0A1B0GWA2	ADAS_HUMAN	Alkyldihydroxyacetonephosphate synthase, peroxisomal
5.32614	5.36102	5.30394	4.79579	NaN	5.19415	5.33037	4.99497	0.46196	-1.11416			0.953194	0.0813699	0.335395	2.23595	O00124	O00124;A0A087WT23;A0A087WV67;A0A087WUA4	UBXN8_HUMAN	UBX domain-containing protein 8
6.10126	6.05593	6.07303	6.22453	6.20732	6.17422	6.07674	6.20202	1.33439	0.416182	+	D:\CHENYUWAN\20240212-dia-lumos\ddab-enps-1h-dia-label-fee\Blank-NPs-DIA-Label-free_D:\CHENYUWAN\20240212-dia-lumos\ddab-enps-1h-dia-label-fee\ddab-enps-1h-DIA-Label-free	2.49453	0.00522151	-0.125283	-6.32232	O00139	O00139;D6R9M0	KIF2A_HUMAN	Kinesin-like protein KIF2A
6.3159	6.21694	6.20098	6.22107	6.24367	6.1036	6.2446	6.18944	0.880722	-0.183241			0.416618	0.343314	0.0551607	0.978657	O00142	O00142;E5KNQ5;A0A0A0MSY7;H3BP77;J3KS73	KITM_HUMAN	Thymidine kinase 2, mitochondrial
7.36983	7.36484	7.36566	7.39599	7.38974	7.39976	7.36678	7.39516	1.06755	0.0943062	+	D:\CHENYUWAN\20240212-dia-lumos\ddab-enps-1h-dia-label-fee\Blank-NPs-DIA-Label-free_D:\CHENYUWAN\20240212-dia-lumos\ddab-enps-1h-dia-label-fee\ddab-enps-1h-DIA-Label-free	2.99594	0.0025291	-0.0283887	-8.5893	O00148	O00148;K7EQN7;A0A0D9SEM9	DX39A_HUMAN	ATP-dependent RNA helicase DDX39A
6.69125	6.6845	6.68579	6.48554	6.48405	6.50557	6.68718	6.49172	0.637587	-0.649306	+	D:\CHENYUWAN\20240212-dia-lumos\ddab-enps-1h-dia-label-fee\Blank-NPs-DIA-Label-free_D:\CHENYUWAN\20240212-dia-lumos\ddab-enps-1h-dia-label-fee\ddab-enps-1h-DIA-Label-free	4.95131	0.0004947	0.195461	27.0007	O00151	O00151	PDLI1_HUMAN	PDZ and LIM domain protein 1
NaN	5.79014	5.606	5.84625	5.92369	5.81689	5.69807	5.86228	1.45952	0.545498			0.877995	0.0974604	-0.164212	-2.05258	O00154	O00154;K7EKP8	BACH_HUMAN	Cytosolic acyl coenzyme A thioester hydrolase
7.27033	7.2636	7.27062	7.26145	7.2665	7.26189	7.26818	7.26328	0.98877	-0.0162929			0.808236	0.114773	0.00490459	1.74727	O00159	O00159;F5H6E2;I3L204	MYO1C_HUMAN	Unconventional myosin-Ic
6.21198	6.15784	6.20573	6.19138	6.1845	6.19543	6.19185	6.19043	0.996746	-0.00470164			0.0273014	0.983915	0.00141525	0.0813501	O00161	O00161;H3BM38;H3BQY9;H3BV99;H3BP15	SNP23_HUMAN	Synaptosomal-associated protein 23
6.70895	6.68564	6.70348	6.67018	6.69268	6.65925	6.69936	6.67404	0.94336	-0.0841201			0.980946	0.0773321	0.0253228	2.09292	O00165	O00165;E9PIQ7	HAX1_HUMAN	HCLS1-associated protein X-1
6.39533	6.35453	6.31758	6.09806	6.10934	6.09823	6.35581	6.10188	0.557267	-0.84356	+	D:\CHENYUWAN\20240212-dia-lumos\ddab-enps-1h-dia-label-fee\Blank-NPs-DIA-Label-free_D:\CHENYUWAN\20240212-dia-lumos\ddab-enps-1h-dia-label-fee\ddab-enps-1h-DIA-Label-free	3.43476	0.00150691	0.253937	11.1558	O00170	O00170;V9GYQ3;E9PMH2	AIP_HUMAN	AH receptor-interacting protein
5.84721	5.83674	5.86708	5.83846	5.87378	5.85997	5.85034	5.8574	1.0164	0.0234617			0.20015	0.762713	-0.00706275	-0.51965	O00178	O00178	GTPB1_HUMAN	GTP-binding protein 1
5.89449	5.90862	5.89145	5.91768	5.88689	5.94453	5.89818	5.91637	1.04275	0.0603982			0.447545	0.3083	-0.0181818	-1.04059	O00180	O00180	KCNK1_HUMAN	Potassium channel subfamily K member 1
6.34554	6.34207	6.34748	6.37235	6.35295	6.37197	6.34503	6.36576	1.04889	0.0688602			1.45902	0.0291209	-0.0207289	-3.14287	O00186	O00186	STXB3_HUMAN	Syntaxin-binding protein 3
6.01981	6.05249	6.05687	6.09484	6.05193	6.02699	6.04306	6.05792	1.03481	0.0493627			0.256844	0.650745	-0.0148592	-0.64587	O00194	O00194;K7ES41	RB27B_HUMAN	Ras-related protein Rab-27B
6.28033	6.23398	6.26186	5.96086	5.94117	5.86582	6.25872	5.92262	0.461209	-1.11651	+	D:\CHENYUWAN\20240212-dia-lumos\ddab-enps-1h-dia-label-fee\Blank-NPs-DIA-Label-free_D:\CHENYUWAN\20240212-dia-lumos\ddab-enps-1h-dia-label-fee\ddab-enps-1h-DIA-Label-free	3.33605	0.00200218	0.336102	10.5226	O00203	O00203	AP3B1_HUMAN	AP-3 complex subunit beta-1
5.76185	5.75918	5.75377	5.71021	5.64749	5.70785	5.75827	5.68851	0.851622	-0.231716			1.55466	0.0233457	0.0697535	3.37621	O00212	O00212	RHOD_HUMAN	Rho-related GTP-binding protein RhoD
6.36803	6.34465	6.4017	6.32142	6.32251	6.32341	6.37146	6.32245	0.893283	-0.162811			1.38066	0.0339506	0.0490108	2.95833	O00214	O00214;F6V2D4;E9PN19;H7BXD8	LEG8_HUMAN	Galectin-8
7.12535	7.15541	7.11957	7.17726	7.14128	7.15876	7.13344	7.1591	1.06086	0.0852285			0.77757	0.123707	-0.0256569	-1.68694	O00217	O00217;E9PN51;F8W9K7;E9PPW7	NDUS8_HUMAN	NADH dehydrogenase [ubiquinone] iron-sulfur protein 8, mitochondrial
6.17227	6.16814	6.15686	6.15605	6.14706	6.11867	6.16576	6.14059	0.943699	-0.0836019			0.968867	0.0792566	0.0251667	2.06834	O00220	O00220;F8U8C0	TR10A_HUMAN	Tumor necrosis factor receptor superfamily member 10A
6.96859	6.9695	6.96353	6.91705	6.91794	6.93964	6.96721	6.92488	0.907131	-0.140617	+	D:\CHENYUWAN\20240212-dia-lumos\ddab-enps-1h-dia-label-fee\Blank-NPs-DIA-Label-free_D:\CHENYUWAN\20240212-dia-lumos\ddab-enps-1h-dia-label-fee\ddab-enps-1h-DIA-Label-free	2.28994	0.00660978	0.0423295	5.55819	O00231	O00231	PSD11_HUMAN	26S proteasome non-ATPase regulatory subunit 11
6.79671	6.79351	6.8143	6.74113	6.72721	6.72864	6.80151	6.73233	0.852746	-0.229812	+	D:\CHENYUWAN\20240212-dia-lumos\ddab-enps-1h-dia-label-fee\Blank-NPs-DIA-Label-free_D:\CHENYUWAN\20240212-dia-lumos\ddab-enps-1h-dia-label-fee\ddab-enps-1h-DIA-Label-free	3.04263	0.00226763	0.0691803	8.83363	O00232	O00232	PSD12_HUMAN	26S proteasome non-ATPase regulatory subunit 12
6.71039	6.68955	6.718	6.5432	6.35995	6.2166	6.70598	6.37325	0.464806	-1.1053			1.6063	0.0211394	0.332729	3.50618	O00233	O00233;F5H7X1;J3KN29;F5GX23;F5H169;F5H5V4	PSMD9_HUMAN	26S proteasome non-ATPase regulatory subunit 9
6.37692	6.39348	6.3765	6.40046	6.33989	6.38373	6.3823	6.3747	0.982644	-0.0252588			0.149895	0.836281	0.00760333	0.402177	O00255	O00255;E7EN32	MEN1_HUMAN	Menin
6.59426	6.5934	6.55324	6.65518	6.63183	6.66827	6.5803	6.65176	1.17885	0.237382			1.84516	0.0146068	-0.0714591	-4.14799	O00257	O00257	CBX4_HUMAN	E3 SUMO-protein ligase CBX4
6.09846	6.07767	6.10864	6.03135	6.1129	6.00615	6.09492	6.05013	0.902	-0.1488			0.59876	0.198905	0.044793	1.33796	O00258	O00258;B7Z1T1;H7C384;H7BYE5	WRB_HUMAN	Tail-anchored protein insertion receptor WRB
7.39195	7.39801	7.40117	7.37071	7.38439	7.38979	7.39704	7.38163	0.965135	-0.0511976			1.15261	0.0515703	0.0154122	2.45099	O00264	O00264	PGRC1_HUMAN	Membrane-associated progesterone receptor component 1
6.56334	6.54925	6.54726	6.63187	6.64734	6.63632	6.55329	6.63851	1.21682	0.28311	+	D:\CHENYUWAN\20240212-dia-lumos\ddab-enps-1h-dia-label-fee\Blank-NPs-DIA-Label-free_D:\CHENYUWAN\20240212-dia-lumos\ddab-enps-1h-dia-label-fee\ddab-enps-1h-DIA-Label-free	3.62258	0.000793774	-0.0852248	-12.4617	O00267	O00267	SPT5H_HUMAN	Transcription elongation factor SPT5
5.90585	5.8709	5.8957	6.02822	5.91021	5.9462	5.89082	5.96154	1.17687	0.234954			0.905991	0.0907507	-0.0707286	-1.94147	O00268	O00268	TAF4_HUMAN	Transcription initiation factor TFIID subunit 4
5.5776	6.08164	6.06196	5.71211	5.80121	5.73233	5.90707	5.74855	0.6942	-0.526578			0.401949	0.360903	0.158516	0.949074	O00273	O00273	DFFA_HUMAN	DNA fragmentation factor subunit alpha
NaN	5.31339	5.43429	5.39506	5.32962	5.36158	5.37384	5.36209	0.973296	-0.0390498			0.0792083	0.923115	0.0117547	0.229438	O00291	O00291	HIP1_HUMAN	Huntingtin-interacting protein 1
7.02342	7.02353	7.00913	6.97072	6.96665	6.9559	7.01869	6.96442	0.882533	-0.180278	+	D:\CHENYUWAN\20240212-dia-lumos\ddab-enps-1h-dia-label-fee\Blank-NPs-DIA-Label-free_D:\CHENYUWAN\20240212-dia-lumos\ddab-enps-1h-dia-label-fee\ddab-enps-1h-DIA-Label-free	2.94566	0.00289002	0.0542688	8.33307	O00299	O00299	CLIC1_HUMAN	Chloride intracellular channel protein 1
6.81769	6.82602	6.83129	6.67436	6.68843	6.66682	6.825	6.67653	0.710446	-0.493203	+	D:\CHENYUWAN\20240212-dia-lumos\ddab-enps-1h-dia-label-fee\Blank-NPs-DIA-Label-free_D:\CHENYUWAN\20240212-dia-lumos\ddab-enps-1h-dia-label-fee\ddab-enps-1h-DIA-Label-free	4.4226	0.000323326	0.148469	19.8777	O00303	O00303	EIF3F_HUMAN	Eukaryotic translation initiation factor 3 subunit F
5.93137	5.97952	5.99628	5.92826	5.92297	5.69822	5.96906	5.84982	0.759911	-0.396098			0.693943	0.152512	0.119237	1.5234	O00308	O00308;Q9H0M0;Q96J02;H0YBS9	WWP2_HUMAN	NEDD4-like E3 ubiquitin-protein ligase WWP2
5.05139	5.02521	5.00319	5.05684	5.09155	NaN	5.0266	5.0742	1.11584	0.158128			0.917795	0.0880734	-0.0476011	-2.14885	O00311	O00311	CDC7_HUMAN	Cell division cycle 7-related protein kinase
6.85102	6.85603	6.87169	6.88143	6.88312	6.86599	6.85958	6.87685	1.04056	0.0573575			0.977884	0.0778744	-0.0172663	-2.08669	O00330	O00330;H0YD97	ODPX_HUMAN	Pyruvate dehydrogenase protein X component, mitochondrial
5.35357	5.26467	5.33764	5.1324	5.11171	5.1377	5.31863	5.12727	0.643637	-0.63568	+	D:\CHENYUWAN\20240212-dia-lumos\ddab-enps-1h-dia-label-fee\Blank-NPs-DIA-Label-free_D:\CHENYUWAN\20240212-dia-lumos\ddab-enps-1h-dia-label-fee\ddab-enps-1h-DIA-Label-free	2.59201	0.00460598	0.191359	6.71643	O00358	O00358	FOXE1_HUMAN	Forkhead box protein E1
4.89621	NaN	NaN	5.3134	5.29598	5.26856	4.89621	5.29265	2.49135	1.31693			0	1	-0.396435	0	O00391	O00391	QSOX1_HUMAN	Sulfhydryl oxidase 1
NaN	5.8338	NaN	NaN	NaN	5.56013	5.8338	5.56013	0.532516	-0.909102			0	1	0.273667	0	O00399	O00399;E5RGW9;E5RK00;E5RFU3;E5RIK5	DCTN6_HUMAN	Dynactin subunit 6
6.24608	6.21938	6.26093	6.15181	6.13954	6.11503	6.24213	6.13546	0.782229	-0.354338	+	D:\CHENYUWAN\20240212-dia-lumos\ddab-enps-1h-dia-label-fee\Blank-NPs-DIA-Label-free_D:\CHENYUWAN\20240212-dia-lumos\ddab-enps-1h-dia-label-fee\ddab-enps-1h-DIA-Label-free	2.55295	0.00506349	0.106666	6.55605	O00400	O00400;H7C562;H7C577	ACATN_HUMAN	Acetyl-coenzyme A transporter 1
6.8657	6.86672	6.87001	6.53885	6.55025	6.56338	6.86747	6.55082	0.482337	-1.05189	+	D:\CHENYUWAN\20240212-dia-lumos\ddab-enps-1h-dia-label-fee\Blank-NPs-DIA-Label-free_D:\CHENYUWAN\20240212-dia-lumos\ddab-enps-1h-dia-label-fee\ddab-enps-1h-DIA-Label-free	5.79512	0	0.31665	43.9485	O00410	O00410;H0Y8C6	IPO5_HUMAN	Importin-5
6.47476	6.45258	6.47908	6.52622	6.51293	6.51167	6.46881	6.51694	1.11721	0.159894	+	D:\CHENYUWAN\20240212-dia-lumos\ddab-enps-1h-dia-label-fee\Blank-NPs-DIA-Label-free_D:\CHENYUWAN\20240212-dia-lumos\ddab-enps-1h-dia-label-fee\ddab-enps-1h-DIA-Label-free	2.1561	0.00805506	-0.0481332	-5.10038	O00411	O00411	RPOM_HUMAN	DNA-directed RNA polymerase, mitochondrial
7.28939	7.26763	7.2826	7.28915	7.28779	7.28153	7.27987	7.28616	1.01457	0.0208706			0.386679	0.382273	-0.00628249	-0.918121	O00422	O00422;X6RAL5;U3KQ12	SAP18_HUMAN	Histone deacetylase complex subunit SAP18
6.60928	6.61226	6.60708	6.51287	6.47496	6.46971	6.60954	6.48585	0.752155	-0.410898	+	D:\CHENYUWAN\20240212-dia-lumos\ddab-enps-1h-dia-label-fee\Blank-NPs-DIA-Label-free_D:\CHENYUWAN\20240212-dia-lumos\ddab-enps-1h-dia-label-fee\ddab-enps-1h-DIA-Label-free	3.08178	0.0023352	0.123692	9.04345	O00425	O00425	IF2B3_HUMAN	Insulin-like growth factor 2 mRNA-binding protein 3
6.40857	6.41757	6.38161	6.07725	6.05906	6.0703	6.40258	6.06887	0.463754	-1.10857	+	D:\CHENYUWAN\20240212-dia-lumos\ddab-enps-1h-dia-label-fee\Blank-NPs-DIA-Label-free_D:\CHENYUWAN\20240212-dia-lumos\ddab-enps-1h-dia-label-fee\ddab-enps-1h-DIA-Label-free	4.99732	0.000509091	0.333713	27.7286	O00429	O00429;G8JLD5	DNM1L_HUMAN	Dynamin-1-like protein
5.0652	5.1004	5.14864	5.03646	5.05917	4.91725	5.10475	5.0043	0.793506	-0.333687			0.935203	0.0843692	0.10045	2.0002	O00442	O00442;A6NIC1	RTCA_HUMAN	RNA 3'-terminal phosphate cyclase
6.10246	6.11597	6.12731	5.98482	5.94886	6.01428	6.11525	5.98266	0.736901	-0.440458	+	D:\CHENYUWAN\20240212-dia-lumos\ddab-enps-1h-dia-label-fee\Blank-NPs-DIA-Label-free_D:\CHENYUWAN\20240212-dia-lumos\ddab-enps-1h-dia-label-fee\ddab-enps-1h-DIA-Label-free	2.55219	0.0050568	0.132591	6.55296	O00443	O00443	P3C2A_HUMAN	Phosphatidylinositol 4-phosphate 3-kinase C2 domain-containing subunit alpha
NaN	5.18777	4.96592	NaN	4.75319	NaN	5.07685	4.75319	0.474614	-1.07517			0	1	0.323659	0	O00458	O00458	IFRD1_HUMAN	Interferon-related developmental regulator 1
6.05922	6.04971	6.04904	6.07512	6.05283	6.05328	6.05266	6.06041	1.01801	0.0257538			0.408428	0.353331	-0.00775258	-0.96216	O00461	O00461	GOLI4_HUMAN	Golgi integral membrane protein 4
5.87674	5.7727	5.83573	5.79029	5.79664	5.77773	5.82839	5.78822	0.911648	-0.133452			0.582308	0.207274	0.0401734	1.30587	O00462	O00462	MANBA_HUMAN	Beta-mannosidase
6.45212	6.46577	6.43577	6.44498	6.43403	6.41601	6.45122	6.43167	0.955988	-0.0649348			0.740902	0.135693	0.0195478	1.61509	O00468	O00468	AGRIN_HUMAN	Agrin
7.14588	7.15118	7.14365	7.05878	7.05719	7.06825	7.14691	7.0614	0.821296	-0.284026	+	D:\CHENYUWAN\20240212-dia-lumos\ddab-enps-1h-dia-label-fee\Blank-NPs-DIA-Label-free_D:\CHENYUWAN\20240212-dia-lumos\ddab-enps-1h-dia-label-fee\ddab-enps-1h-DIA-Label-free	4.50112	0.000342298	0.0854999	20.8042	O00469	O00469;C9JXZ0;E7ETU9	PLOD2_HUMAN	Procollagen-lysine,2-oxoglutarate 5-dioxygenase 2
5.59067	5.21626	5.63312	5.60406	5.33262	5.5293	5.48002	5.48866	1.0201	0.0287081			0.018512	0.991675	-0.0086422	-0.0556755	O00470	O14770;O00470;Q99687;U3KPR8;F5GYS8;H0YNA8;H3BLU4;H0YNY8;H0YMX5;U3KQV2	MEIS1_HUMAN	Homeobox protein Meis1
6.16704	6.12704	6.17355	5.82696	5.94997	5.84893	6.15588	5.87529	0.524096	-0.932096	+	D:\CHENYUWAN\20240212-dia-lumos\ddab-enps-1h-dia-label-fee\Blank-NPs-DIA-Label-free_D:\CHENYUWAN\20240212-dia-lumos\ddab-enps-1h-dia-label-fee\ddab-enps-1h-DIA-Label-free	2.63948	0.00403066	0.280589	6.91591	O00471	O00471;A0A0A0MSI8	EXOC5_HUMAN	Exocyst complex component 5
6.70006	6.71401	6.6958	6.74029	6.76813	6.7431	6.70329	6.75051	1.11486	0.156857			1.97645	0.0111816	-0.0472188	-4.53249	O00479	O00479	HMGN4_HUMAN	High mobility group nucleosome-binding domain-containing protein 4
7.67828	7.64795	7.67344	7.66107	7.63886	7.63478	7.66656	7.64491	0.951368	-0.0719242			0.803609	0.115658	0.0216513	1.73815	O00483	O00483	NDUA4_HUMAN	Cytochrome c oxidase subunit NDUFA4
7.05568	7.05273	7.05212	6.96666	6.9519	6.96592	7.05351	6.96149	0.809068	-0.305667	+	D:\CHENYUWAN\20240212-dia-lumos\ddab-enps-1h-dia-label-fee\Blank-NPs-DIA-Label-free_D:\CHENYUWAN\20240212-dia-lumos\ddab-enps-1h-dia-label-fee\ddab-enps-1h-DIA-Label-free	4.31542	0.00029661	0.0920149	18.678	O00487	O00487	PSDE_HUMAN	26S proteasome non-ATPase regulatory subunit 14
5.94709	5.99378	5.95923	5.67739	5.59264	5.72931	5.9667	5.66645	0.500895	-0.997419	+	D:\CHENYUWAN\20240212-dia-lumos\ddab-enps-1h-dia-label-fee\Blank-NPs-DIA-Label-free_D:\CHENYUWAN\20240212-dia-lumos\ddab-enps-1h-dia-label-fee\ddab-enps-1h-DIA-Label-free	2.68507	0.00406335	0.300253	7.11233	O00488	O00488;A9J4F5	ZN593_HUMAN	Zinc finger protein 593
5.36197	5.35223	5.43281	NaN	5.12384	NaN	5.38234	5.12384	0.551443	-0.858716			0	1	0.258499	0	O00499	O00499	BIN1_HUMAN	Myc box-dependent-interacting protein 1
6.30331	6.30361	6.29793	6.2271	6.20894	6.17108	6.30162	6.20238	0.795716	-0.329675	+	D:\CHENYUWAN\20240212-dia-lumos\ddab-enps-1h-dia-label-fee\Blank-NPs-DIA-Label-free_D:\CHENYUWAN\20240212-dia-lumos\ddab-enps-1h-dia-label-fee\ddab-enps-1h-DIA-Label-free	2.40465	0.00583404	0.0992419	5.97655	O00505	O00505	IMA4_HUMAN	Importin subunit alpha-4
5.44381	5.50134	5.46068	NaN	NaN	5.10153	5.46861	5.10153	0.429456	-1.21942			0	1	0.367081	0	O00507	O00507	USP9Y_HUMAN	Probable ubiquitin carboxyl-terminal hydrolase FAF-Y
7.21762	7.23262	7.22314	7.23303	7.22436	7.24366	7.22446	7.23368	1.02147	0.0306404			0.579281	0.209505	-0.00922362	-1.29996	O00541	O00541;B5MCF9	PESC_HUMAN	Pescadillo homolog
6.41629	6.43956	6.40999	6.36641	6.3224	6.32744	6.42195	6.33875	0.825666	-0.27637	+	D:\CHENYUWAN\20240212-dia-lumos\ddab-enps-1h-dia-label-fee\Blank-NPs-DIA-Label-free_D:\CHENYUWAN\20240212-dia-lumos\ddab-enps-1h-dia-label-fee\ddab-enps-1h-DIA-Label-free	2.13274	0.00825746	0.0831957	5.02362	O00560	O00560;G5EA09;B4DHN5;E9PBU7	SDCB1_HUMAN	Syntenin-1
6.54387	6.54384	6.53952	6.50975	6.50832	6.52185	6.54241	6.51331	0.935188	-0.0966714	+	D:\CHENYUWAN\20240212-dia-lumos\ddab-enps-1h-dia-label-fee\Blank-NPs-DIA-Label-free_D:\CHENYUWAN\20240212-dia-lumos\ddab-enps-1h-dia-label-fee\ddab-enps-1h-DIA-Label-free	2.52143	0.00525699	0.0291012	6.42904	O00566	O00566	MPP10_HUMAN	U3 small nucleolar ribonucleoprotein protein MPP10
7.39421	7.37793	7.3859	7.39238	7.39459	7.38771	7.38602	7.39156	1.01285	0.0184157			0.468751	0.289344	-0.00554403	-1.08277	O00567	O00567;H0Y653;H0YDU4	NOP56_HUMAN	Nucleolar protein 56
7.97784	7.97156	7.98081	8.15995	8.16293	8.16193	7.97674	8.16161	1.53063	0.614123	+	D:\CHENYUWAN\20240212-dia-lumos\ddab-enps-1h-dia-label-fee\Blank-NPs-DIA-Label-free_D:\CHENYUWAN\20240212-dia-lumos\ddab-enps-1h-dia-label-fee\ddab-enps-1h-DIA-Label-free	6.46235	0	-0.184869	-64.5581	O00571	O15523;O00571;A0A0D9SG12;A0A0D9SFB3;A0A0D9SF53;C9J081;C9J8G5	DDX3X_HUMAN	ATP-dependent RNA helicase DDX3X
7.30121	7.27898	7.29426	7.28244	7.29127	7.26768	7.29148	7.28046	0.974948	-0.0366021			0.507049	0.255874	0.0110186	1.15844	O00592	O00592	PODXL_HUMAN	Podocalyxin
6.78314	6.83111	6.81111	6.99138	7.01704	6.99417	6.80845	7.00086	1.55742	0.639161	+	D:\CHENYUWAN\20240212-dia-lumos\ddab-enps-1h-dia-label-fee\Blank-NPs-DIA-Label-free_D:\CHENYUWAN\20240212-dia-lumos\ddab-enps-1h-dia-label-fee\ddab-enps-1h-DIA-Label-free	3.55019	0.00076788	-0.192407	-11.942	O00622	O00622	CYR61_HUMAN	Protein CYR61
5.5689	NaN	5.49076	5.48305	NaN	5.51772	5.52983	5.50038	0.934441	-0.0978241			0.250217	0.666505	0.0294478	0.688918	O00623	O00623;K7ELY8;A0A075B773	PEX12_HUMAN	Peroxisome assembly protein 12
5.82391	5.77867	5.83094	5.14599	NaN	5.28035	5.81117	5.21317	0.252347	-1.98652	+	D:\CHENYUWAN\20240212-dia-lumos\ddab-enps-1h-dia-label-fee\Blank-NPs-DIA-Label-free_D:\CHENYUWAN\20240212-dia-lumos\ddab-enps-1h-dia-label-fee\ddab-enps-1h-DIA-Label-free	2.79374	0.00352285	0.598002	11.0022	O00625	O00625	PIR_HUMAN	Pirin
6.67266	6.65081	6.64806	6.55563	6.56899	6.56613	6.65718	6.56358	0.806131	-0.310914	+	D:\CHENYUWAN\20240212-dia-lumos\ddab-enps-1h-dia-label-fee\Blank-NPs-DIA-Label-free_D:\CHENYUWAN\20240212-dia-lumos\ddab-enps-1h-dia-label-fee\ddab-enps-1h-DIA-Label-free	3.35802	0.00167257	0.0935944	10.6605	O00629	O00505;O00629;H7C4F6	IMA3_HUMAN	Importin subunit alpha-3
6.27249	6.26118	6.30926	6.38632	6.39698	6.34454	6.28098	6.37595	1.24442	0.315475			1.93098	0.0124453	-0.0949672	-4.39656	O00712	O00712;Q5VW26;A0A1B0GTC1;A0A1B0GWB8;A0A1B0GU97;A0A1B0GVN4;A0A0A0MRX8;U3KQE8;A0A1B0GWJ4;A0A1B0GWI9;A0A1B0GW37;Q5VW30;Q5VW27	NFIB_HUMAN	Nuclear factor 1 B-type
NaN	NaN	4.96278	NaN	4.8767	NaN	4.96278	4.8767	0.820199	-0.285955			0	1	0.086081	0	O00716	O00716	E2F3_HUMAN	Transcription factor E2F3
6.42207	6.3733	6.38271	6.14645	6.03411	6.03302	6.39269	6.07119	0.476977	-1.06801	+	D:\CHENYUWAN\20240212-dia-lumos\ddab-enps-1h-dia-label-fee\Blank-NPs-DIA-Label-free_D:\CHENYUWAN\20240212-dia-lumos\ddab-enps-1h-dia-label-fee\ddab-enps-1h-DIA-Label-free	2.86589	0.00312329	0.321503	7.94085	O00743	O00743	PPP6_HUMAN	Serine/threonine-protein phosphatase 6 catalytic subunit
6.262	6.23521	6.23097	6.2277	6.23173	6.21707	6.24273	6.2255	0.961111	-0.0572257			0.741825	0.135504	0.017227	1.6169	O00754	O00754	MA2B1_HUMAN	Lysosomal alpha-mannosidase
6.00433	5.95227	5.97922	6.05391	6.06021	6.06797	5.97861	6.0607	1.20806	0.272692	+	D:\CHENYUWAN\20240212-dia-lumos\ddab-enps-1h-dia-label-fee\Blank-NPs-DIA-Label-free_D:\CHENYUWAN\20240212-dia-lumos\ddab-enps-1h-dia-label-fee\ddab-enps-1h-DIA-Label-free	2.20723	0.00737575	-0.0820882	-5.27158	O00764	O00764;F2Z2Y4	PDXK_HUMAN	Pyridoxal kinase
6.79535	6.79875	6.78328	6.647	6.60049	6.57897	6.79246	6.60882	0.655173	-0.610052	+	D:\CHENYUWAN\20240212-dia-lumos\ddab-enps-1h-dia-label-fee\Blank-NPs-DIA-Label-free_D:\CHENYUWAN\20240212-dia-lumos\ddab-enps-1h-dia-label-fee\ddab-enps-1h-DIA-Label-free	3.05653	0.00228207	0.183644	8.90761	O00767	O00767	ACOD_HUMAN	Acyl-CoA desaturase
6.56389	6.57186	6.57509	6.57525	6.57471	6.5633	6.57028	6.57109	1.00185	0.00266529			0.0539479	0.952463	-0.000802199	-0.156546	O14497	O14497;A0A1B0GTU5;H0Y488;A0A087WUV6	ARI1A_HUMAN	AT-rich interactive domain-containing protein 1A
6.64788	6.66003	6.64541	6.70416	6.66844	6.70152	6.65111	6.69137	1.09714	0.133753			1.50779	0.0258633	-0.0402632	-3.2607	O14519	O14519;F5GZF0	CDKA1_HUMAN	Cyclin-dependent kinase 2-associated protein 1
6.85196	6.84955	6.85615	6.87067	6.87116	6.87469	6.85255	6.87217	1.04621	0.0651729	+	D:\CHENYUWAN\20240212-dia-lumos\ddab-enps-1h-dia-label-fee\Blank-NPs-DIA-Label-free_D:\CHENYUWAN\20240212-dia-lumos\ddab-enps-1h-dia-label-fee\ddab-enps-1h-DIA-Label-free	2.97959	0.00259253	-0.019619	-8.50519	O14521	O14521	DHSD_HUMAN	Succinate dehydrogenase [ubiquinone] cytochrome b small subunit, mitochondrial
5.3164	5.31668	5.31805	5.27645	5.2011	5.35062	5.31704	5.27606	0.90994	-0.136157			0.402158	0.360678	0.0409877	0.949497	O14523	O14523	C2C2L_HUMAN	C2 domain-containing protein 2-like
6.21573	6.19376	6.21516	6.24068	6.25641	6.1751	6.20822	6.22406	1.03716	0.0526426			0.241013	0.686438	-0.0158467	-0.611194	O14524	O14524	NEMP1_HUMAN	Nuclear envelope integral membrane protein 1
5.58787	5.53544	5.64381	5.18866	5.22703	5.18017	5.58904	5.19862	0.406988	-1.29694	+	D:\CHENYUWAN\20240212-dia-lumos\ddab-enps-1h-dia-label-fee\Blank-NPs-DIA-Label-free_D:\CHENYUWAN\20240212-dia-lumos\ddab-enps-1h-dia-label-fee\ddab-enps-1h-DIA-Label-free	3.4615	0.0013911	0.390418	11.3334	O14530	O14530	TXND9_HUMAN	Thioredoxin domain-containing protein 9
5.14368	5.00607	5.22275	NaN	4.74784	NaN	5.12417	4.74784	0.420411	-1.25013			0	1	0.376326	0	O14545	O14545	TRAD1_HUMAN	TRAF-type zinc finger domain-containing protein 1
7.08351	7.09543	7.10376	7.08916	7.07192	7.10007	7.09423	7.08705	0.983605	-0.0238492			0.28751	0.575154	0.00717926	0.711963	O14548	O14548;E5RJZ1;H0YBD2	COX7R_HUMAN	Cytochrome c oxidase subunit 7A-related protein, mitochondrial
6.69512	6.62357	6.63628	6.65668	6.69701	6.70091	6.65166	6.68487	1.07947	0.110319			0.563082	0.21887	-0.0332093	-1.26832	O14561	O14561;I3L505	ACPM_HUMAN	Acyl carrier protein, mitochondrial
6.01963	6.01719	5.91316	6.05556	6.05428	6.01059	5.98333	6.04014	1.13977	0.18874			0.677942	0.159353	-0.0568166	-1.49222	O14578	O14578;H7BYJ3	CTRO_HUMAN	Citron Rho-interacting kinase
6.64729	6.64691	6.62561	6.28911	6.29444	6.34397	6.63994	6.30917	0.466913	-1.09877	+	D:\CHENYUWAN\20240212-dia-lumos\ddab-enps-1h-dia-label-fee\Blank-NPs-DIA-Label-free_D:\CHENYUWAN\20240212-dia-lumos\ddab-enps-1h-dia-label-fee\ddab-enps-1h-DIA-Label-free	4.20541	0.000273973	0.330764	17.5205	O14579	O14579;M0QXB4	COPE_HUMAN	Coatomer subunit epsilon
6.34914	6.26265	6.352	6.09622	6.20723	5.79787	6.32126	6.03378	0.515835	-0.955018			1.0751	0.0630508	0.287489	2.28717	O14617	O14617;A0A087WYN6	AP3D1_HUMAN	AP-3 complex subunit delta-1
6.28791	6.36132	6.31622	6.36207	6.41664	6.39015	6.32182	6.38962	1.16897	0.225234			1.20004	0.0463365	-0.0678023	-2.55321	O14628	O14628;A0A087WT67	ZN195_HUMAN	Zinc finger protein 195
6.36932	6.36679	6.32351	6.34064	6.33168	6.3577	6.3532	6.34334	0.977543	-0.0327675			0.231535	0.705118	0.00986385	0.590233	O14639	O14639;A0A0A0MRL6;F8W8M4	ABLM1_HUMAN	Actin-binding LIM protein 1
5.78073	5.92426	5.87829	5.73161	NaN	NaN	5.86109	5.73161	0.742198	-0.430124			0	1	0.129481	0	O14641	O14641;I3L2N2	DVL2_HUMAN	Segment polarity protein dishevelled homolog DVL-2
6.61623	6.58342	6.60008	6.61509	6.61488	6.60185	6.59991	6.61061	1.02493	0.0355192			0.439568	0.317181	-0.0106928	-1.02467	O14646	O14646	CHD1_HUMAN	Chromodomain-helicase-DNA-binding protein 1
6.31059	6.30503	6.34226	6.39343	6.35825	6.40287	6.31929	6.38485	1.16294	0.21778			1.67059	0.0191358	-0.0655586	-3.67216	O14647	O14647;A0A1B0GTU9	CHD2_HUMAN	Chromodomain-helicase-DNA-binding protein 2
6.03087	6.04657	6.03232	6.00134	5.95905	6.00779	6.03659	5.98939	0.89702	-0.156787			1.37029	0.0345221	0.047198	2.93433	O14653	O14653;I3L4Z6;E7EQ34;I3L1K7;I3L0K1;I3L3V4	GOSR2_HUMAN	Golgi SNAP receptor complex member 2
6.48208	6.47332	6.46751	6.45545	6.4624	6.45013	6.47431	6.45599	0.958712	-0.06083			1.5293	0.0246909	0.0183113	3.31342	O14656	O14656	TOR1A_HUMAN	Torsin-1A
6.48517	6.44976	6.44838	6.38485	6.32506	6.30895	6.4611	6.33962	0.755988	-0.403564			2.02003	0.0101436	0.121485	4.66564	O14657	O14657	TOR1B_HUMAN	Torsin-1B
6.01693	6.01813	5.99418	6.0162	5.99382	6.01709	6.00975	6.00904	0.998364	-0.00236189			0.0217849	0.989289	0.000711123	0.0652904	O14662	O14662;Q96NX8;E9PND6;H3BU86;B7ZBM5;B7ZBM4;H0YEW0;B7ZBM8;F8W9Z6	STX16_HUMAN	Syntaxin-16
6.32231	6.38507	6.32302	6.21421	6.17442	6.20405	6.34347	6.19756	0.71465	-0.48469	+	D:\CHENYUWAN\20240212-dia-lumos\ddab-enps-1h-dia-label-fee\Blank-NPs-DIA-Label-free_D:\CHENYUWAN\20240212-dia-lumos\ddab-enps-1h-dia-label-fee\ddab-enps-1h-DIA-Label-free	2.43279	0.00551946	0.145906	6.08303	O14672	O14672	ADA10_HUMAN	Disintegrin and metalloproteinase domain-containing protein 10
6.60185	6.52532	6.57206	6.53665	6.55059	6.54741	6.56641	6.54489	0.951646	-0.0715034			0.402219	0.360737	0.0215247	0.949622	O14681	O14681;E9PK61;E9PL33;E9PM05;E9PLB8;E9PS58	EI24_HUMAN	Etoposide-induced protein 2.4 homolog
7.40947	7.39325	7.41432	7.38181	7.41032	7.37101	7.40568	7.38771	0.959476	-0.0596807			0.602954	0.196739	0.0179661	1.34614	O14684	O14684	PTGES_HUMAN	Prostaglandin E synthase
4.99316	5.06917	5.12366	4.98637	5.07427	5.0107	5.062	5.02378	0.915764	-0.126953			0.343859	0.445677	0.0382169	0.830314	O14686	O14686	KMT2D_HUMAN	Histone-lysine N-methyltransferase 2D
5.97827	5.93495	5.99608	6.03906	6.07859	6.0137	5.96976	6.04378	1.18582	0.245886			1.32313	0.0374321	-0.0740188	-2.82638	O14732	O14732	IMPA2_HUMAN	Inositol monophosphatase 2
6.30235	6.39306	6.29824	6.23628	6.28083	6.11724	6.33122	6.21145	0.75899	-0.397847			0.970552	0.0790263	0.119764	2.07177	O14734	O14734;H7C5A7	ACOT8_HUMAN	Acyl-coenzyme A thioesterase 8
6.8246	6.8457	6.83674	6.81526	6.80852	6.82001	6.83568	6.81459	0.952608	-0.0700462			1.41022	0.0323737	0.0210861	3.02727	O14735	O14735;B3KY94	CDIPT_HUMAN	CDP-diacylglycerol--inositol 3-phosphatidyltransferase
6.07346	6.06843	6.05666	5.84591	5.89875	5.91746	6.06618	5.88737	0.662505	-0.593997	+	D:\CHENYUWAN\20240212-dia-lumos\ddab-enps-1h-dia-label-fee\Blank-NPs-DIA-Label-free_D:\CHENYUWAN\20240212-dia-lumos\ddab-enps-1h-dia-label-fee\ddab-enps-1h-DIA-Label-free	2.90475	0.00287737	0.178811	8.12979	O14737	O14737;K7EQA1	PDCD5_HUMAN	Programmed cell death protein 5
6.87069	6.87591	6.87055	6.77891	6.79899	6.77044	6.87238	6.78278	0.813575	-0.297653	+	D:\CHENYUWAN\20240212-dia-lumos\ddab-enps-1h-dia-label-fee\Blank-NPs-DIA-Label-free_D:\CHENYUWAN\20240212-dia-lumos\ddab-enps-1h-dia-label-fee\ddab-enps-1h-DIA-Label-free	3.30957	0.00196371	0.0896023	10.3586	O14744	O14744;H0YJX6	ANM5_HUMAN	Protein arginine N-methyltransferase 5
6.35834	6.38698	6.37215	6.28425	6.27556	6.27682	6.37249	6.27888	0.806097	-0.310975	+	D:\CHENYUWAN\20240212-dia-lumos\ddab-enps-1h-dia-label-fee\Blank-NPs-DIA-Label-free_D:\CHENYUWAN\20240212-dia-lumos\ddab-enps-1h-dia-label-fee\ddab-enps-1h-DIA-Label-free	3.37283	0.00168374	0.093613	10.7544	O14745	O14745	NHRF1_HUMAN	Na(+)/H(+) exchange regulatory cofactor NHE-RF1
5.63743	5.64494	5.56056	5.37767	5.40704	5.47881	5.61431	5.42118	0.641009	-0.641584	+	D:\CHENYUWAN\20240212-dia-lumos\ddab-enps-1h-dia-label-fee\Blank-NPs-DIA-Label-free_D:\CHENYUWAN\20240212-dia-lumos\ddab-enps-1h-dia-label-fee\ddab-enps-1h-DIA-Label-free	2.05828	0.00966801	0.193136	4.7849	O14757	O14757;E7EPP6;J3KN87	CHK1_HUMAN	Serine/threonine-protein kinase Chk1
6.09874	6.21249	6.08262	6.12535	6.07779	6.10396	6.13128	6.10237	0.93559	-0.0960513			0.268218	0.623649	0.0289138	0.670542	O14763	O14763	TR10B_HUMAN	Tumor necrosis factor receptor superfamily member 10B
6.56246	6.55112	6.54143	6.56961	6.58247	6.5699	6.55167	6.574	1.05275	0.0741576			1.40416	0.032802	-0.0223233	-3.01307	O14773	O14773;E7EV34	TPP1_HUMAN	Tripeptidyl-peptidase 1
6.81421	6.78366	6.80029	6.88593	6.89088	6.88032	6.79939	6.88571	1.21989	0.286747	+	D:\CHENYUWAN\20240212-dia-lumos\ddab-enps-1h-dia-label-fee\Blank-NPs-DIA-Label-free_D:\CHENYUWAN\20240212-dia-lumos\ddab-enps-1h-dia-label-fee\ddab-enps-1h-DIA-Label-free	3.1177	0.00211185	-0.0863193	-9.23993	O14776	O14776	TCRG1_HUMAN	Transcription elongation regulator 1
5.79272	5.78801	5.88655	NaN	5.67623	5.55675	5.82243	5.61649	0.622389	-0.684112			1.3675	0.0347926	0.205938	3.3859	O14777	O14777	NDC80_HUMAN	Kinetochore protein NDC80 homolog
NaN	NaN	4.82059	5.07793	NaN	NaN	4.82059	5.07793	1.80859	0.854862			0	1	-0.257339	0	O14782	O14782;F8WAR6;F8WER6	KIF3C_HUMAN	Kinesin-like protein KIF3C
6.84154	6.81263	6.80776	6.30963	6.44949	6.44414	6.82064	6.40109	0.380581	-1.39372	+	D:\CHENYUWAN\20240212-dia-lumos\ddab-enps-1h-dia-label-fee\Blank-NPs-DIA-Label-free_D:\CHENYUWAN\20240212-dia-lumos\ddab-enps-1h-dia-label-fee\ddab-enps-1h-DIA-Label-free	3.0618	0.0022967	0.419552	8.93582	O14787	O14787;A0A075B780	TNPO2_HUMAN	Transportin-2
6.57436	6.5515	6.53616	6.60208	6.61267	6.63076	6.554	6.61517	1.15124	0.203191			1.93204	0.0124569	-0.0611668	-4.39971	O14802	O14802	RPC1_HUMAN	DNA-directed RNA polymerase III subunit RPC1
5.68144	5.63999	5.66645	5.69053	5.79814	5.77877	5.66263	5.75581	1.23933	0.309563			1.2409	0.0430471	-0.0931875	-2.6426	O14817	O14817;A8MVV6;E9PSH3;E9PPX8;E9PN41;J3KQ42	TSN4_HUMAN	Tetraspanin-4
7.13591	7.13539	7.13485	7.16019	7.16769	7.16639	7.13538	7.16476	1.06997	0.0975706	+	D:\CHENYUWAN\20240212-dia-lumos\ddab-enps-1h-dia-label-fee\Blank-NPs-DIA-Label-free_D:\CHENYUWAN\20240212-dia-lumos\ddab-enps-1h-dia-label-fee\ddab-enps-1h-DIA-Label-free	3.63999	0.000801047	-0.0293721	-12.59	O14818	O14818;H0Y586	PSA7_HUMAN	Proteasome subunit alpha type-7
6.52879	6.55842	6.58633	6.55582	6.51807	6.56198	6.55785	6.54529	0.971501	-0.0417123			0.228147	0.711734	0.012557	0.582704	O14828	O14828	SCAM3_HUMAN	Secretory carrier-associated membrane protein 3
6.08179	6.09093	6.08118	6.15705	6.11829	6.11235	6.08463	6.12923	1.10815	0.148149			1.44278	0.0300495	-0.0445976	-3.10413	O14874	O14874;H3BS02;H3BTL2	BCKD_HUMAN	[3-methyl-2-oxobutanoate dehydrogenase [lipoamide]] kinase, mitochondrial
6.49038	6.50617	6.47886	5.95878	5.96275	5.93762	6.4918	5.95305	0.289232	-1.7897	+	D:\CHENYUWAN\20240212-dia-lumos\ddab-enps-1h-dia-label-fee\Blank-NPs-DIA-Label-free_D:\CHENYUWAN\20240212-dia-lumos\ddab-enps-1h-dia-label-fee\ddab-enps-1h-DIA-Label-free	5.96542	0	0.538753	48.4826	O14879	O14879	IFIT3_HUMAN	Interferon-induced protein with tetratricopeptide repeats 3
7.04428	7.06133	7.03351	7.07749	7.04189	7.0723	7.04637	7.06389	1.04117	0.0582113			0.566487	0.216997	-0.017523	-1.27498	O14880	O14880;Q5VV89	MGST3_HUMAN	Microsomal glutathione S-transferase 3
6.46746	6.4371	6.42019	6.46121	6.45378	6.42785	6.44159	6.44761	1.01397	0.020019			0.129161	0.860913	-0.00602627	-0.351794	O14893	O14893;H0YEL0	GEMI2_HUMAN	Gem-associated protein 2
6.25633	6.23629	6.28373	5.98013	6.05547	6.04359	6.25878	6.0264	0.585618	-0.771968	+	D:\CHENYUWAN\20240212-dia-lumos\ddab-enps-1h-dia-label-fee\Blank-NPs-DIA-Label-free_D:\CHENYUWAN\20240212-dia-lumos\ddab-enps-1h-dia-label-fee\ddab-enps-1h-DIA-Label-free	2.99145	0.00252021	0.232386	8.56615	O14908	O14908;K7ESN1;K7EM11	GIPC1_HUMAN	PDZ domain-containing protein GIPC1
6.3704	6.41569	6.3988	6.30852	6.29896	6.3202	6.39496	6.30923	0.820857	-0.284798	+	D:\CHENYUWAN\20240212-dia-lumos\ddab-enps-1h-dia-label-fee\Blank-NPs-DIA-Label-free_D:\CHENYUWAN\20240212-dia-lumos\ddab-enps-1h-dia-label-fee\ddab-enps-1h-DIA-Label-free	2.37992	0.00603945	0.0857325	5.88421	O14925	Q5SRD1;O14925;B4DDK6	TIM23_HUMAN	Mitochondrial import inner membrane translocase subunit Tim23
6.44265	6.44618	6.42213	6.70108	6.67473	6.69571	6.43699	6.6905	1.79274	0.842163	+	D:\CHENYUWAN\20240212-dia-lumos\ddab-enps-1h-dia-label-fee\Blank-NPs-DIA-Label-free_D:\CHENYUWAN\20240212-dia-lumos\ddab-enps-1h-dia-label-fee\ddab-enps-1h-DIA-Label-free	4.6787	0.000384615	-0.253516	-23.0599	O14929	O14929	HAT1_HUMAN	Histone acetyltransferase type B catalytic subunit
6.11366	6.12418	6.12792	6.1326	6.13988	6.09414	6.12192	6.12221	1.00067	0.000961145			0.00640811	1	-0.00028944	-0.0195308	O14936	O14936;Q5JS79;Q5JS72	CSKP_HUMAN	Peripheral plasma membrane protein CASK
7.10839	7.10381	7.11795	7.09936	7.11795	7.09713	7.11005	7.10481	0.988018	-0.0173903			0.268383	0.623557	0.00523488	0.670899	O14949	O14949	QCR8_HUMAN	Cytochrome b-c1 complex subunit 8
6.91559	6.90565	6.92833	6.72146	6.73883	6.69921	6.91652	6.71984	0.635788	-0.653382	+	D:\CHENYUWAN\20240212-dia-lumos\ddab-enps-1h-dia-label-fee\Blank-NPs-DIA-Label-free_D:\CHENYUWAN\20240212-dia-lumos\ddab-enps-1h-dia-label-fee\ddab-enps-1h-DIA-Label-free	3.926	0.000468354	0.196688	14.8868	O14950;P19105	P19105;O14950;J3QRS3	ML12A_HUMAN;ML12B_HUMAN	Myosin regulatory light chain 12B
6.10588	6.13833	6.12712	6.13211	6.10144	6.09649	6.12378	6.11001	0.968798	-0.0457319			0.397265	0.366636	0.0137666	0.939597	O14957	O14957	QCR10_HUMAN	Cytochrome b-c1 complex subunit 10
6.4655	6.44873	6.45028	6.21394	5.95775	6.16764	6.45484	6.11311	0.45527	-1.1352			1.90681	0.0127086	0.34173	4.3255	O14964	O14964;I3L1P5;I3L165	HGS_HUMAN	Hepatocyte growth factor-regulated tyrosine kinase substrate
6.15662	6.17918	6.19317	6.02536	6.00823	5.92513	6.17632	5.98624	0.645527	-0.63145	+	D:\CHENYUWAN\20240212-dia-lumos\ddab-enps-1h-dia-label-fee\Blank-NPs-DIA-Label-free_D:\CHENYUWAN\20240212-dia-lumos\ddab-enps-1h-dia-label-fee\ddab-enps-1h-DIA-Label-free	2.35908	0.00611111	0.190086	5.80734	O14965	O14965;A3KFJ0;Q5QPD4	AURKA_HUMAN	Aurora kinase A
5.9739	5.92219	5.96964	5.96659	5.92558	5.84718	5.95524	5.91312	0.907561	-0.139933			0.470873	0.287681	0.042124	1.08697	O14966	O14966;E9PL56	RAB7L_HUMAN	Ras-related protein Rab-7L1
5.88872	5.7674	5.925	5.7507	5.72018	5.82891	5.86037	5.7666	0.805799	-0.311508			0.747346	0.13369	0.093773	1.6277	O14967	O14967;D6RAZ4	CLGN_HUMAN	Calmegin
6.72219	6.73164	6.73406	6.66354	6.65766	6.65277	6.7293	6.65799	0.848578	-0.236881	+	D:\CHENYUWAN\20240212-dia-lumos\ddab-enps-1h-dia-label-fee\Blank-NPs-DIA-Label-free_D:\CHENYUWAN\20240212-dia-lumos\ddab-enps-1h-dia-label-fee\ddab-enps-1h-DIA-Label-free	3.93114	0.000470588	0.0713086	14.9315	O14974	O14974;H0YIM2;H0YIS3	MYPT1_HUMAN	Protein phosphatase 1 regulatory subunit 12A
6.35743	6.35195	6.36734	6.34767	6.33457	6.33091	6.35891	6.33772	0.952381	-0.0703894			1.44847	0.0297431	0.0211891	3.11767	O14975	O14975;G3V1R7	S27A2_HUMAN	Very long-chain acyl-CoA synthetase
5.70011	5.71837	5.73979	5.46672	NaN	NaN	5.71942	5.46672	0.558857	-0.839448			0	1	0.252699	0	O14976	O14976;D6RC24	GAK_HUMAN	Cyclin-G-associated kinase
7.66109	7.6797	7.67473	7.7041	7.68873	7.67907	7.67184	7.69063	1.04422	0.0624246			0.959613	0.0804103	-0.0187917	-2.04956	O14979	O14979;A0A087WUK2	HNRDL_HUMAN	Heterogeneous nuclear ribonucleoprotein D-like
7.2012	7.19999	7.20306	7.06333	7.06219	7.0714	7.20142	7.06564	0.73152	-0.45103	+	D:\CHENYUWAN\20240212-dia-lumos\ddab-enps-1h-dia-label-fee\Blank-NPs-DIA-Label-free_D:\CHENYUWAN\20240212-dia-lumos\ddab-enps-1h-dia-label-fee\ddab-enps-1h-DIA-Label-free	5.82728	0	0.135774	44.771	O14980	O14980;C9IZS4;C9JV99;H7BZC5;C9JQ02;C9JKM9;C9J673	XPO1_HUMAN	Exportin-1
6.11525	6.10844	6.10494	6.18014	6.20962	6.16777	6.10955	6.18584	1.19206	0.253459	+	D:\CHENYUWAN\20240212-dia-lumos\ddab-enps-1h-dia-label-fee\Blank-NPs-DIA-Label-free_D:\CHENYUWAN\20240212-dia-lumos\ddab-enps-1h-dia-label-fee\ddab-enps-1h-DIA-Label-free	2.40324	0.00583051	-0.0762986	-5.97126	O14981	O14981;A0A0A0MTH9	BTAF1_HUMAN	TATA-binding protein-associated factor 172
5.44651	5.52319	5.51153	5.36433	5.58824	5.28906	5.49374	5.41388	0.832029	-0.265295			0.357805	0.423137	0.0798618	0.859087	O15014	O15014	ZN609_HUMAN	Zinc finger protein 609
6.15359	6.1836	6.17084	6.17245	6.1882	6.18612	6.16934	6.18226	1.03018	0.0429005			0.574792	0.211687	-0.012914	-1.2912	O15020	O15020;A4QPE4;E9PJZ2	SPTN2_HUMAN	Spectrin beta chain, non-erythrocytic 2
6.79416	6.79108	6.7905	6.62561	6.64224	6.64526	6.79191	6.6377	0.70112	-0.512267	+	D:\CHENYUWAN\20240212-dia-lumos\ddab-enps-1h-dia-label-fee\Blank-NPs-DIA-Label-free_D:\CHENYUWAN\20240212-dia-lumos\ddab-enps-1h-dia-label-fee\ddab-enps-1h-DIA-Label-free	4.80506	0.000424242	0.154208	24.8102	O15027	O15027;F1T0I1;J3KNL6;X6RGP5	SC16A_HUMAN	Protein transport protein Sec16A
6.45234	6.46375	6.45587	6.4596	6.45523	6.45835	6.45732	6.45773	1.00093	0.00134427			0.0380037	0.971424	-0.000404676	-0.112008	O15031	O15031;A6QRG9;A0A087WU36	PLXB2_HUMAN	Plexin-B2
7.00731	7.02052	7.01341	7.01178	7.02627	7.02456	7.01375	7.02087	1.01653	0.0236554			0.525802	0.242612	-0.00712109	-1.19531	O15042	O15042;E7ET15;H7C4V2	SR140_HUMAN	U2 snRNP-associated SURP motif-containing protein
5.64777	5.61436	5.64385	5.70512	5.69758	5.65476	5.63533	5.68582	1.12329	0.167729			1.25425	0.0421453	-0.0504912	-2.67205	O15047	O15047	SET1A_HUMAN	Histone-lysine N-methyltransferase SETD1A
6.11348	6.1147	6.15055	6.13498	NaN	5.82731	6.12625	5.98114	0.715974	-0.48202			0.52471	0.24322	0.145102	1.25376	O15050	O15050	TRNK1_HUMAN	TPR and ankyrin repeat-containing protein 1
6.21011	6.20551	6.23651	6.23967	6.22462	6.2599	6.21738	6.24139	1.05685	0.079775			0.788055	0.12045	-0.0240151	-1.70754	O15061	O15061;A0A075B7B1;H0YL34	SYNEM_HUMAN	Synemin
6.4837	6.48382	6.4877	6.593	6.56787	6.52698	6.48507	6.56262	1.19548	0.257594			1.79991	0.0156922	-0.0775441	-4.02092	O15067	O15067;H0YGH1	PUR4_HUMAN	Phosphoribosylformylglycinamidine synthase
NaN	NaN	6.77418	NaN	NaN	6.24406	6.77418	6.24406	0.295037	-1.76103			0	1	0.530124	0	O15068	O15068;H7BYP9	MCF2L_HUMAN	Guanine nucleotide exchange factor DBS
4.912	NaN	4.91981	5.09959	NaN	NaN	4.91591	5.09959	1.52646	0.610193			0	1	-0.183687	0	O15085	O15085	ARHGB_HUMAN	Rho guanine nucleotide exchange factor 11
6.22992	6.20629	6.23531	6.3392	6.30602	6.33577	6.22384	6.327	1.26811	0.342679	+	D:\CHENYUWAN\20240212-dia-lumos\ddab-enps-1h-dia-label-fee\Blank-NPs-DIA-Label-free_D:\CHENYUWAN\20240212-dia-lumos\ddab-enps-1h-dia-label-fee\ddab-enps-1h-DIA-Label-free	2.76617	0.00372508	-0.103157	-7.47389	O15091	O15091;A0A0A0MTQ0	MRRP3_HUMAN	Mitochondrial ribonuclease P protein 3
6.66738	6.67553	6.65612	6.66357	6.65374	6.65203	6.66634	6.65644	0.977465	-0.0328827			0.672786	0.161412	0.00989882	1.48217	O15118	O15118	NPC1_HUMAN	Niemann-Pick C1 protein
5.5325	5.51564	5.44248	5.47259	5.47298	5.45184	5.49687	5.4658	0.930951	-0.103223			0.472606	0.286114	0.0310731	1.09041	O15119	O15119	TBX3_HUMAN	T-box transcription factor TBX3
6.53135	6.47858	6.54936	6.53648	6.54859	6.52977	6.51976	6.53828	1.04357	0.0615221			0.35056	0.435304	-0.01852	-0.844163	O15120	O15120	PLCB_HUMAN	1-acyl-sn-glycerol-3-phosphate acyltransferase beta
6.65321	6.63956	6.64523	6.57928	6.54126	6.57825	6.646	6.56626	0.83227	-0.264877	+	D:\CHENYUWAN\20240212-dia-lumos\ddab-enps-1h-dia-label-fee\Blank-NPs-DIA-Label-free_D:\CHENYUWAN\20240212-dia-lumos\ddab-enps-1h-dia-label-fee\ddab-enps-1h-DIA-Label-free	2.43153	0.00551265	0.0797358	6.07826	O15121	O15121;E7EMA0	DEGS1_HUMAN	Sphingolipid delta(4)-desaturase DES1
6.29768	6.32716	6.28283	6.2563	6.26698	6.2697	6.30256	6.26433	0.915728	-0.127008			1.31146	0.0383058	0.0382331	2.79997	O15126	O15126;A0A087WU14;A0A087WXB0	SCAM1_HUMAN	Secretory carrier-associated membrane protein 1
6.58828	6.53979	6.59303	6.57865	6.56812	6.63158	6.5737	6.59279	1.04492	0.0633957			0.29817	0.546932	-0.0190843	-0.734639	O15127	O15127	SCAM2_HUMAN	Secretory carrier-associated membrane protein 2
6.63615	6.65238	6.63992	6.64297	6.64511	6.62688	6.64282	6.63832	0.989698	-0.0149398			0.233701	0.701611	0.00449737	0.595036	O15143	O15143;C9JQM8;C9J4Z7;C9JFG9;C9J6C8;C9JEY1;C9JBJ7;C9K057;F8VXW2	ARC1B_HUMAN	Actin-related protein 2/3 complex subunit 1B
6.81734	6.82664	6.82332	6.84573	6.84554	6.84192	6.82243	6.8444	1.05187	0.0729595	+	D:\CHENYUWAN\20240212-dia-lumos\ddab-enps-1h-dia-label-fee\Blank-NPs-DIA-Label-free_D:\CHENYUWAN\20240212-dia-lumos\ddab-enps-1h-dia-label-fee\ddab-enps-1h-DIA-Label-free	2.73749	0.00381845	-0.0219633	-7.34424	O15144	O15144	ARPC2_HUMAN	Actin-related protein 2/3 complex subunit 2
6.88877	6.9025	6.92047	6.8977	6.90158	6.87597	6.90391	6.89175	0.972381	-0.0404068			0.427551	0.330446	0.0121635	1.00062	O15145	O15145	ARPC3_HUMAN	Actin-related protein 2/3 complex subunit 3
5.87484	5.91283	5.90779	5.80718	5.81699	5.74845	5.89849	5.79087	0.780525	-0.357483			1.92994	0.0124937	0.107613	4.39348	O15155	O15155;C9JTT8;H7C1N3;Q68DU7	BET1_HUMAN	BET1 homolog
5.94506	5.95087	5.96845	5.96315	5.99676	5.97118	5.95479	5.97703	1.05254	0.0738686			0.836339	0.107448	-0.0222367	-1.80277	O15156	O15156	ZBT7B_HUMAN	Zinc finger and BTB domain-containing protein 7B
6.7713	6.77145	6.77585	6.75717	6.73841	6.74367	6.77287	6.74642	0.940909	-0.0878727			1.99067	0.0107106	0.0264517	4.57563	O15160	O15160;E7EQB9;H0Y723	RPAC1_HUMAN	DNA-directed RNA polymerases I and III subunit RPAC1
6.31415	6.31088	6.30662	6.30164	6.31399	6.29287	6.31055	6.30283	0.982392	-0.0256287			0.521184	0.245357	0.00771491	1.18624	O15162	O15162;C9J7K9;C9J0H3;C9JE06	PLS1_HUMAN	Phospholipid scramblase 1
6.37899	6.36001	6.40933	6.42359	6.43635	6.3911	6.38277	6.41701	1.08203	0.113739			0.80389	0.115594	-0.0342385	-1.7387	O15164	O15164	TIF1A_HUMAN	Transcription intermediary factor 1-alpha
7.59558	7.59867	7.60279	7.55812	7.55937	7.56728	7.59901	7.56159	0.917434	-0.124323	+	D:\CHENYUWAN\20240212-dia-lumos\ddab-enps-1h-dia-label-fee\Blank-NPs-DIA-Label-free_D:\CHENYUWAN\20240212-dia-lumos\ddab-enps-1h-dia-label-fee\ddab-enps-1h-DIA-Label-free	3.34163	0.00165427	0.0374254	10.5575	O15173	O15173	PGRC2_HUMAN	Membrane-associated progesterone receptor component 2
6.36217	6.3433	NaN	6.30883	6.52536	6.30678	6.35274	6.38032	1.06559	0.091647			0.103455	0.894343	-0.0275881	-0.293844	O15197	O15197;F8WCM8;A0A0G2JNH7;A0A0G2JNC5;J3KQU5	EPHB6_HUMAN	Ephrin type-B receptor 6
5.89353	5.88604	5.97059	5.83869	5.83132	5.85605	5.91672	5.84202	0.841971	-0.248158			1.25243	0.0423411	0.0747029	2.66803	O15212	O15212	PFD6_HUMAN	Prefoldin subunit 6
6.6901	6.68399	6.68508	6.70003	6.69827	6.69785	6.68639	6.69872	1.02879	0.0409494	+	D:\CHENYUWAN\20240212-dia-lumos\ddab-enps-1h-dia-label-fee\Blank-NPs-DIA-Label-free_D:\CHENYUWAN\20240212-dia-lumos\ddab-enps-1h-dia-label-fee\ddab-enps-1h-DIA-Label-free	2.45739	0.00527569	-0.0123274	-6.17745	O15213	O15213	WDR46_HUMAN	WD repeat-containing protein 46
6.96125	6.95005	6.94644	6.93955	6.93429	6.93296	6.95258	6.9356	0.961651	-0.0564141			1.59253	0.0218029	0.0169821	3.47124	O15226	O15226	NKRF_HUMAN	NF-kappa-B-repressing factor
6.27164	6.25901	6.30137	6.26163	6.29085	6.28271	6.27734	6.2784	1.00244	0.00351017			0.0231071	0.988006	-0.00105667	-0.0691561	O15228	O15228;Q5TBH6	GNPAT_HUMAN	Dihydroxyacetone phosphate acyltransferase
6.45384	6.4504	6.43294	6.48106	6.47884	6.47012	6.44573	6.47667	1.07385	0.102797			1.88112	0.0133864	-0.0309451	-4.25091	O15230	O15230	LAMA5_HUMAN	Laminin subunit alpha-5
5.29827	5.25285	5.26027	5.00983	5.14832	5.13801	5.27046	5.09872	0.673371	-0.570527			1.67225	0.0191194	0.171746	3.67651	O15231	O15231;H0Y704	ZN185_HUMAN	Zinc finger protein 185
5.4324	5.3315	5.22537	NaN	5.45414	5.33386	5.32976	5.394	1.15943	0.213418			0.281011	0.591953	-0.0642451	-0.719933	O15234	O15234	CASC3_HUMAN	Protein CASC3
5.79822	5.79314	5.75771	5.80618	5.80879	5.83458	5.78302	5.81652	1.08018	0.111277			1.00519	0.0728982	-0.0334978	-2.14247	O15235	O15235	RT12_HUMAN	28S ribosomal protein S12, mitochondrial
6.15413	6.15912	6.11415	6.13945	6.16365	6.21922	6.14246	6.17411	1.07558	0.105121			0.501677	0.259815	-0.0316451	-1.14786	O15239	O15239	NDUA1_HUMAN	NADH dehydrogenase [ubiquinone] 1 alpha subcomplex subunit 1
5.57717	5.55135	5.54659	5.57293	5.52821	5.53361	5.55837	5.54491	0.969494	-0.0446954			0.32525	0.483493	0.0134546	0.791621	O15243	O15243;A0A087X0N2	OBRG_HUMAN	Leptin receptor gene-related protein
5.70612	5.7881	5.74846	5.79306	5.74381	5.75902	5.74756	5.7653	1.04169	0.0589266			0.25341	0.659036	-0.017739	-0.638382	O15254	O15254	ACOX3_HUMAN	Peroxisomal acyl-coenzyme A oxidase 3
6.7346	6.71381	6.7536	6.62008	6.64589	6.63907	6.734	6.63501	0.796177	-0.328839	+	D:\CHENYUWAN\20240212-dia-lumos\ddab-enps-1h-dia-label-fee\Blank-NPs-DIA-Label-free_D:\CHENYUWAN\20240212-dia-lumos\ddab-enps-1h-dia-label-fee\ddab-enps-1h-DIA-Label-free	2.69377	0.00394501	0.0989906	7.15038	O15258	O15258	RER1_HUMAN	Protein RER1
7.62862	7.62305	7.61829	7.52142	7.52093	7.51958	7.62332	7.52064	0.789445	-0.34109	+	D:\CHENYUWAN\20240212-dia-lumos\ddab-enps-1h-dia-label-fee\Blank-NPs-DIA-Label-free_D:\CHENYUWAN\20240212-dia-lumos\ddab-enps-1h-dia-label-fee\ddab-enps-1h-DIA-Label-free	5.34167	0	0.102678	33.8317	O15260	O15260;Q5T8U5;B7Z1G8	SURF4_HUMAN	Surfeit locus protein 4
6.59003	6.60127	6.57748	6.53008	6.52966	6.50667	6.5896	6.52213	0.856125	-0.224106	+	D:\CHENYUWAN\20240212-dia-lumos\ddab-enps-1h-dia-label-fee\Blank-NPs-DIA-Label-free_D:\CHENYUWAN\20240212-dia-lumos\ddab-enps-1h-dia-label-fee\ddab-enps-1h-DIA-Label-free	2.54427	0.00512179	0.0674629	6.5209	O15269	O15269	SPTC1_HUMAN	Serine palmitoyltransferase 1
6.02334	6.0295	6.0279	5.95053	5.96544	5.94097	6.02691	5.95232	0.842172	-0.247814	+	D:\CHENYUWAN\20240212-dia-lumos\ddab-enps-1h-dia-label-fee\Blank-NPs-DIA-Label-free_D:\CHENYUWAN\20240212-dia-lumos\ddab-enps-1h-dia-label-fee\ddab-enps-1h-DIA-Label-free	3.27403	0.00209224	0.0745994	10.1423	O15270	O15270;H0YJV2	SPTC2_HUMAN	Serine palmitoyltransferase 2
5.542	5.61262	5.56709	5.6229	5.59597	5.54909	5.5739	5.58932	1.03614	0.051223			0.198653	0.764387	-0.0154195	-0.516234	O15287	O15287;C9JSE3	FANCG_HUMAN	Fanconi anemia group G protein
6.49296	6.50155	6.49557	6.21582	6.20817	6.23782	6.4967	6.2206	0.52955	-0.91716	+	D:\CHENYUWAN\20240212-dia-lumos\ddab-enps-1h-dia-label-fee\Blank-NPs-DIA-Label-free_D:\CHENYUWAN\20240212-dia-lumos\ddab-enps-1h-dia-label-fee\ddab-enps-1h-DIA-Label-free	5.12601	0.00057377	0.276092	29.8697	O15294	O15294	OGT1_HUMAN	UDP-N-acetylglucosamine--peptide N-acetylglucosaminyltransferase 110 kDa subunit
5.65548	5.72649	5.82437	5.77009	5.67406	5.73951	5.73545	5.72789	0.982743	-0.0251138			0.0456966	0.962988	0.00755978	0.13366	O15305	O15305;H3BV34;H3BR08;H3BRM0;H3BNY9;H3BT06;H3BV55;H3BM92;H3BPH4	PMM2_HUMAN	Phosphomannomutase 2
6.49826	6.5071	6.50848	6.48347	6.46078	6.4847	6.50461	6.47632	0.936921	-0.0940006			1.55016	0.0234969	0.0282969	3.36502	O15320;Q96PC5	O15320;Q96PC5;G3V599	CTGE5_HUMAN;MIA2_HUMAN	cTAGE family member 5
6.41096	6.40486	6.4215	6.43185	6.44624	6.42057	6.41244	6.43288	1.0482	0.0679124			1.08253	0.0620408	-0.0204436	-2.3027	O15321	O15321;G3V1B9;E9PS99;E9PJM1;E9PNW2;E9PSI1;E9PQY7;E9PMQ9;E9PL78	TM9S1_HUMAN	Transmembrane 9 superfamily member 1
6.37414	6.37511	6.36811	6.54959	6.53239	6.52176	6.37245	6.53458	1.45255	0.538584	+	D:\CHENYUWAN\20240212-dia-lumos\ddab-enps-1h-dia-label-fee\Blank-NPs-DIA-Label-free_D:\CHENYUWAN\20240212-dia-lumos\ddab-enps-1h-dia-label-fee\ddab-enps-1h-DIA-Label-free	4.37227	0.000311804	-0.16213	-19.3052	O15347	O15347;E7EQU1;E7ES08;E9PES6	HMGB3_HUMAN	High mobility group protein B3
6.19523	6.19535	6.22131	6.49099	6.48267	6.4613	6.20397	6.47832	1.88086	0.911392	+	D:\CHENYUWAN\20240212-dia-lumos\ddab-enps-1h-dia-label-fee\Blank-NPs-DIA-Label-free_D:\CHENYUWAN\20240212-dia-lumos\ddab-enps-1h-dia-label-fee\ddab-enps-1h-DIA-Label-free	4.60921	0.000363636	-0.274357	-22.1498	O15355	O15355	PPM1G_HUMAN	Protein phosphatase 1G
5.67285	5.69349	5.66378	5.23356	NaN	NaN	5.67671	5.23356	0.360461	-1.47208			0	1	0.443141	0	O15357	O15357;A0A0A0MTP6	SHIP2_HUMAN	Phosphatidylinositol 3,4,5-trisphosphate 5-phosphatase 2
5.78432	5.79349	5.77458	5.93999	5.90769	5.94198	5.78413	5.92989	1.39881	0.4842	+	D:\CHENYUWAN\20240212-dia-lumos\ddab-enps-1h-dia-label-fee\Blank-NPs-DIA-Label-free_D:\CHENYUWAN\20240212-dia-lumos\ddab-enps-1h-dia-label-fee\ddab-enps-1h-DIA-Label-free	3.52578	0.00109046	-0.145759	-11.7714	O15360	O15360;H3BS03	FANCA_HUMAN	Fanconi anemia group A protein
7.05001	7.04715	7.03737	6.96102	6.9889	6.97745	7.04484	6.97579	0.853	-0.229382	+	D:\CHENYUWAN\20240212-dia-lumos\ddab-enps-1h-dia-label-fee\Blank-NPs-DIA-Label-free_D:\CHENYUWAN\20240212-dia-lumos\ddab-enps-1h-dia-label-fee\ddab-enps-1h-DIA-Label-free	2.81806	0.00330298	0.0690514	7.71372	O15371	O15371	EIF3D_HUMAN	Eukaryotic translation initiation factor 3 subunit D
6.70849	6.71	6.72239	6.5238	6.52759	6.55817	6.71363	6.53652	0.665104	-0.588348	+	D:\CHENYUWAN\20240212-dia-lumos\ddab-enps-1h-dia-label-fee\Blank-NPs-DIA-Label-free_D:\CHENYUWAN\20240212-dia-lumos\ddab-enps-1h-dia-label-fee\ddab-enps-1h-DIA-Label-free	3.94899	0.000475884	0.177111	15.088	O15372	O15372;B3KS98;A0A087WZK9;E5RJT0	EIF3H_HUMAN	Eukaryotic translation initiation factor 3 subunit H
6.2533	6.24503	6.23742	6.27375	6.25541	6.25727	6.24525	6.26214	1.03967	0.0561229			1.07043	0.0634947	-0.0168943	-2.2774	O15379	O15379;E7ESJ6	HDAC3_HUMAN	Histone deacetylase 3
6.87759	6.89602	6.8811	6.89489	6.86942	6.8717	6.8849	6.87867	0.985752	-0.0207034			0.249155	0.668562	0.00623226	0.629078	O15381	O15381;E9PH71;E7EWK7;F8WF01;E9PGD8	NVL_HUMAN	Nuclear valosin-containing protein-like
6.74223	6.74302	6.75318	6.78769	6.77114	6.78475	6.74614	6.7812	1.08406	0.116444	+	D:\CHENYUWAN\20240212-dia-lumos\ddab-enps-1h-dia-label-fee\Blank-NPs-DIA-Label-free_D:\CHENYUWAN\20240212-dia-lumos\ddab-enps-1h-dia-label-fee\ddab-enps-1h-DIA-Label-free	2.31724	0.00634259	-0.0350528	-5.6555	O15382	O15382;B3KSI3;M0QZ10;M0QXF9;M0R2K7	BCAT2_HUMAN	Branched-chain-amino-acid aminotransferase, mitochondrial
5.16279	5.35269	4.90418	4.97926	4.8204	4.81446	5.13989	4.87137	0.538868	-0.891997			0.889216	0.0946499	0.268518	1.9079	O15392	O15392;A0A0B4J1S3;H3BLT4;K7EMW2	BIRC5_HUMAN	Baculoviral IAP repeat-containing protein 5
6.08487	6.106	6.11836	5.89387	5.87494	5.87684	6.10308	5.88188	0.600906	-0.734788	+	D:\CHENYUWAN\20240212-dia-lumos\ddab-enps-1h-dia-label-fee\Blank-NPs-DIA-Label-free_D:\CHENYUWAN\20240212-dia-lumos\ddab-enps-1h-dia-label-fee\ddab-enps-1h-DIA-Label-free	4.36897	0.000310421	0.221193	19.2682	O15397	O15397;H0YH64	IPO8_HUMAN	Importin-8
6.36151	6.37241	6.37476	6.39387	6.39036	6.36437	6.36956	6.38287	1.03112	0.0442138			0.584318	0.206613	-0.0133093	-1.3098	O15400	O15400	STX7_HUMAN	Syntaxin-7
5.11948	5.19159	5.18591	5.13098	4.87982	5.0125	5.16566	5.00776	0.695192	-0.524517			0.971428	0.0788276	0.157896	2.07355	O15403	O15403;A0A087WX92	MOT7_HUMAN	Monocarboxylate transporter 7
7.43263	7.42159	7.43141	7.43685	7.44377	7.4141	7.42854	7.43157	1.007	0.0100677			0.114365	0.88159	-0.0030303	-0.315036	O15427	O15427;J3QQV2;J3QQS9;J3KT83;J3KTM6;J3QSC3;J3QRA0;J3KTI8	MOT4_HUMAN	Monocarboxylate transporter 4
6.0365	6.00143	6.06123	5.86593	NaN	5.92037	6.03305	5.89315	0.724604	-0.464734			1.72161	0.0176833	0.139899	4.62929	O15431	O15431	COPT1_HUMAN	High affinity copper uptake protein 1
6.25044	6.23021	6.25267	6.21525	6.19897	6.2221	6.24444	6.21211	0.92826	-0.107399			1.50885	0.0258168	0.0323302	3.26327	O15438	O15438	MRP3_HUMAN	Canalicular multispecific organic anion transporter 2
6.52989	6.54185	6.51932	6.56737	6.55816	6.52737	6.53035	6.55097	1.04861	0.0684771			0.682479	0.157596	-0.0206138	-1.50106	O15439	O15439	MRP4_HUMAN	Multidrug resistance-associated protein 4
6.14876	6.06401	6.10802	6.0552	6.08663	5.98091	6.10693	6.04091	0.858977	-0.219308			0.763963	0.12814	0.0660187	1.66025	O15440	O15440	MRP5_HUMAN	Multidrug resistance-associated protein 5
6.3789	6.3877	6.36317	6.3725	6.31618	6.3791	6.37659	6.35592	0.953528	-0.0686521			0.414389	0.345974	0.0206664	0.974173	O15446	O15446	RPA34_HUMAN	DNA-directed RNA polymerase I subunit RPA34
6.59766	6.58606	NaN	6.55279	6.55472	6.53236	6.59186	6.54662	0.901079	-0.150275			1.67211	0.0191115	0.0452373	4.43737	O15455	O15455	TLR3_HUMAN	Toll-like receptor 3
6.70196	6.71149	6.71198	6.57469	6.546	6.56607	6.70848	6.56226	0.714136	-0.48573	+	D:\CHENYUWAN\20240212-dia-lumos\ddab-enps-1h-dia-label-fee\Blank-NPs-DIA-Label-free_D:\CHENYUWAN\20240212-dia-lumos\ddab-enps-1h-dia-label-fee\ddab-enps-1h-DIA-Label-free	4.05594	0.000514783	0.146219	16.0597	O15460	O15460	P4HA2_HUMAN	Prolyl 4-hydroxylase subunit alpha-2
7.04892	7.06397	7.03872	6.9897	6.97883	6.97934	7.05054	6.98262	0.855239	-0.2256	+	D:\CHENYUWAN\20240212-dia-lumos\ddab-enps-1h-dia-label-fee\Blank-NPs-DIA-Label-free_D:\CHENYUWAN\20240212-dia-lumos\ddab-enps-1h-dia-label-fee\ddab-enps-1h-DIA-Label-free	2.94679	0.00279559	0.0679124	8.33878	O15479	O15479;Q96LZ2;Q9UBF1;O15481;P43366	MAGB2_HUMAN	Melanoma-associated antigen B2
5.83902	5.77697	5.81885	5.59987	5.34222	NaN	5.81161	5.47104	0.456489	-1.13135			1.38612	0.0336156	0.34057	3.44441	O15498	O15498;H7C3K7	YKT6_HUMAN	Synaptobrevin homolog YKT6
5.56768	5.68448	5.62034	5.64253	5.78783	5.72688	5.62417	5.71908	1.24425	0.315282			0.813598	0.113228	-0.0949095	-1.75784	O15504	O15504;C9JYA1	NUPL2_HUMAN	Nucleoporin-like protein 2
6.95497	6.92435	6.97318	6.90507	6.89364	6.91979	6.95083	6.90617	0.902263	-0.148379			1.29771	0.0394394	0.0446663	2.76897	O15511	O15511;B1ALC0	ARPC5_HUMAN	Actin-related protein 2/3 complex subunit 5
6.70361	6.75293	6.70531	6.66934	6.65732	6.63596	6.72062	6.65421	0.858204	-0.220608			1.6104	0.0211089	0.0664099	3.51664	O15514	O15514;E9PB93;E9PHV4	RPB4_HUMAN	DNA-directed RNA polymerase II subunit RPB4
6.99505	7.00561	6.99327	6.93406	6.92245	6.92281	6.99798	6.92644	0.848127	-0.237649	+	D:\CHENYUWAN\20240212-dia-lumos\ddab-enps-1h-dia-label-fee\Blank-NPs-DIA-Label-free_D:\CHENYUWAN\20240212-dia-lumos\ddab-enps-1h-dia-label-fee\ddab-enps-1h-DIA-Label-free	3.72099	0.000567493	0.0715389	13.2032	O15533	O15533;Q6P1N7;A2AB90;A0A0G2JH37;A0A0A0MSV9;A0A0G2JKZ1;C9JA35	TPSN_HUMAN	Tapasin
NaN	5.90878	NaN	5.91305	5.97062	6.06271	5.90878	5.98213	1.18398	0.243641			0	1	-0.0733428	0	O15541	O15541	R113A_HUMAN	RING finger protein 113A
6.36816	6.34829	6.37649	6.42342	6.42514	6.41651	6.36431	6.42169	1.14123	0.190595	+	D:\CHENYUWAN\20240212-dia-lumos\ddab-enps-1h-dia-label-fee\Blank-NPs-DIA-Label-free_D:\CHENYUWAN\20240212-dia-lumos\ddab-enps-1h-dia-label-fee\ddab-enps-1h-DIA-Label-free	2.5496	0.00513531	-0.0573743	-6.54247	O15554	O15554;D1MQ08;M0R1J0;M0QZ70	KCNN4_HUMAN	Intermediate conductance calcium-activated potassium channel protein 4
7.57253	7.58332	7.57628	7.62577	7.63382	7.64076	7.57738	7.63345	1.13782	0.186268	+	D:\CHENYUWAN\20240212-dia-lumos\ddab-enps-1h-dia-label-fee\Blank-NPs-DIA-Label-free_D:\CHENYUWAN\20240212-dia-lumos\ddab-enps-1h-dia-label-fee\ddab-enps-1h-DIA-Label-free	3.32555	0.0019849	-0.0560722	-10.4573	O43143	O43143;Q14562;O60231;A0A140T947;F5H658	DHX15_HUMAN	Pre-mRNA-splicing factor ATP-dependent RNA helicase DHX15
6.69956	6.67333	6.67333	6.77697	6.78619	6.74804	6.68208	6.7704	1.22553	0.29341	+	D:\CHENYUWAN\20240212-dia-lumos\ddab-enps-1h-dia-label-fee\Blank-NPs-DIA-Label-free_D:\CHENYUWAN\20240212-dia-lumos\ddab-enps-1h-dia-label-fee\ddab-enps-1h-DIA-Label-free	2.44179	0.00535741	-0.0883252	-6.11743	O43148	O43148;K7EP06;K7ERH6	MCES_HUMAN	mRNA cap guanine-N7 methyltransferase
5.78981	5.72349	5.74402	NaN	NaN	5.35717	5.75244	5.35717	0.402461	-1.31308			0	1	0.395277	0	O43156	O43156	TTI1_HUMAN	TELO2-interacting protein 1 homolog
6.73142	6.73667	6.7243	6.7557	6.75152	6.76243	6.7308	6.75655	1.0611	0.0855574	+	D:\CHENYUWAN\20240212-dia-lumos\ddab-enps-1h-dia-label-fee\Blank-NPs-DIA-Label-free_D:\CHENYUWAN\20240212-dia-lumos\ddab-enps-1h-dia-label-fee\ddab-enps-1h-DIA-Label-free	2.23728	0.00707403	-0.0257551	-5.37434	O43159	O43159;E9PPY3	RRP8_HUMAN	Ribosomal RNA-processing protein 8
NaN	5.55724	NaN	5.36141	NaN	NaN	5.55724	5.36141	0.637048	-0.650527			0	1	0.195828	0	O43166	O43166;H0YJY2;F5GYF8	SI1L1_HUMAN	Signal-induced proliferation-associated 1-like protein 1
4.71808	4.82883	4.52367	4.88212	4.62342	4.90618	4.69019	4.80391	1.29932	0.377754			0.375285	0.396765	-0.113715	-0.894908	O43167	O43167	ZBT24_HUMAN	Zinc finger and BTB domain-containing protein 24
7.23459	7.21939	7.22685	7.19919	7.16206	7.21103	7.22694	7.19076	0.920061	-0.120198			1.10544	0.0576835	0.0361834	2.35084	O43169	O43169;J3KNF8;J3QR91	CYB5B_HUMAN	Cytochrome b5 type B
6.74796	6.74883	6.72314	6.72938	6.72037	6.74136	6.73998	6.73037	0.978121	-0.0319149			0.390028	0.377775	0.00960716	0.924924	O43172	O43172	PRP4_HUMAN	U4/U6 small nuclear ribonucleoprotein Prp4
7.07633	7.07863	7.07917	6.92887	6.92909	6.92289	7.07805	6.92695	0.706166	-0.501921	+	D:\CHENYUWAN\20240212-dia-lumos\ddab-enps-1h-dia-label-fee\Blank-NPs-DIA-Label-free_D:\CHENYUWAN\20240212-dia-lumos\ddab-enps-1h-dia-label-fee\ddab-enps-1h-DIA-Label-free	6.56036	0	0.151093	68.308	O43175	O43175;Q5SZU1	SERA_HUMAN	D-3-phosphoglycerate dehydrogenase
6.38495	6.44038	6.42739	6.44146	6.43808	6.4299	6.41757	6.43648	1.0445	0.0628121			0.480816	0.278886	-0.0189083	-1.10667	O43181	O43181	NDUS4_HUMAN	NADH dehydrogenase [ubiquinone] iron-sulfur protein 4, mitochondrial
NaN	5.30096	NaN	NaN	NaN	5.72097	5.30096	5.72097	2.63034	1.39525			0	1	-0.420012	0	O43189	O43189;A2AB23;A2AB22;A0A140TA01;A0A087WVG4;E9PQZ5;E9PQT8	PHF1_HUMAN	PHD finger protein 1
5.93658	5.92072	5.97589	5.65756	5.60077	5.52408	5.94439	5.59414	0.446418	-1.16353	+	D:\CHENYUWAN\20240212-dia-lumos\ddab-enps-1h-dia-label-fee\Blank-NPs-DIA-Label-free_D:\CHENYUWAN\20240212-dia-lumos\ddab-enps-1h-dia-label-fee\ddab-enps-1h-DIA-Label-free	2.94658	0.00279322	0.350258	8.33772	O43237	O43237;J3KRI4	DC1L2_HUMAN	Cytoplasmic dynein 1 light intermediate chain 2
6.692	6.6913	6.69105	6.64044	6.63908	6.63274	6.69145	6.63742	0.883024	-0.179476	+	D:\CHENYUWAN\20240212-dia-lumos\ddab-enps-1h-dia-label-fee\Blank-NPs-DIA-Label-free_D:\CHENYUWAN\20240212-dia-lumos\ddab-enps-1h-dia-label-fee\ddab-enps-1h-DIA-Label-free	4.64592	0.000375335	0.0540277	22.626	O43242	O43242	PSMD3_HUMAN	26S proteasome non-ATPase regulatory subunit 3
6.82549	6.81785	6.80142	6.86069	6.86144	6.85832	6.81492	6.86015	1.10976	0.150246	+	D:\CHENYUWAN\20240212-dia-lumos\ddab-enps-1h-dia-label-fee\Blank-NPs-DIA-Label-free_D:\CHENYUWAN\20240212-dia-lumos\ddab-enps-1h-dia-label-fee\ddab-enps-1h-DIA-Label-free	2.49244	0.00521817	-0.0452288	-6.31409	O43251	O43251;B0QYV1;S4R3K7;A0A0G2JRA5;A0A0G2JRD1	RFOX2_HUMAN	RNA binding protein fox-1 homolog 2
5.95244	5.90401	5.91611	6.36095	6.35587	6.35339	5.92419	6.35674	2.7074	1.43691	+	D:\CHENYUWAN\20240212-dia-lumos\ddab-enps-1h-dia-label-fee\Blank-NPs-DIA-Label-free_D:\CHENYUWAN\20240212-dia-lumos\ddab-enps-1h-dia-label-fee\ddab-enps-1h-DIA-Label-free	5.09751	0.000562249	-0.432551	-29.3818	O43252	O43252	PAPS1_HUMAN	Bifunctional 3'-phosphoadenosine 5'-phosphosulfate synthase 1
6.05811	6.06776	6.06935	5.97562	5.98795	6.00488	6.06507	5.98948	0.840255	-0.2511	+	D:\CHENYUWAN\20240212-dia-lumos\ddab-enps-1h-dia-label-fee\Blank-NPs-DIA-Label-free_D:\CHENYUWAN\20240212-dia-lumos\ddab-enps-1h-dia-label-fee\ddab-enps-1h-DIA-Label-free	2.92601	0.00285142	0.0755884	8.2349	O43264	O43264	ZW10_HUMAN	Centromere/kinetochore protein zw10 homolog
6.65694	6.66148	6.66689	6.65627	6.63784	6.64233	6.66177	6.64548	0.963192	-0.0541042			1.22412	0.0439786	0.016287	2.60573	O43290	O43290	SNUT1_HUMAN	U4/U6.U5 tri-snRNP-associated protein 1
6.97232	6.9684	6.98251	6.93485	6.93505	6.91923	6.97441	6.92971	0.902192	-0.148494	+	D:\CHENYUWAN\20240212-dia-lumos\ddab-enps-1h-dia-label-fee\Blank-NPs-DIA-Label-free_D:\CHENYUWAN\20240212-dia-lumos\ddab-enps-1h-dia-label-fee\ddab-enps-1h-DIA-Label-free	2.57695	0.00470114	0.0447014	6.65419	O43292	O43292;E9PPZ9;E9PLV6	GPAA1_HUMAN	Glycosylphosphatidylinositol anchor attachment 1 protein
5.3539	5.39356	5.31484	5.18417	5.21762	6.01416	5.3541	5.47199	1.31186	0.39161			0.162858	0.819025	-0.117887	-0.433071	O43293	O43293	DAPK3_HUMAN	Death-associated protein kinase 3
NaN	5.45726	5.45399	5.20098	NaN	5.47475	5.45563	5.33786	0.762497	-0.391197			0.318467	0.49833	0.117761	0.860214	O43306	O43306;O95622;B3KWA8;C9JQ38;C9JRT8	ADCY6_HUMAN	Adenylate cyclase type 6
NaN	NaN	4.99677	5.21347	5.32227	5.5291	4.99677	5.35495	2.28128	1.18984			0	1	-0.358178	0	O43310	O43310	CTIF_HUMAN	CBP80/20-dependent translation initiation factor
5.15162	5.61117	NaN	5.14003	NaN	5.21359	5.3814	5.17681	0.62433	-0.679618			0.326031	0.481618	0.204586	0.879191	O43314	O43314;A0A087WZV0;D6RBU4	VIP2_HUMAN	Inositol hexakisphosphate and diphosphoinositol-pentakisphosphate kinase 2
6.71023	6.68986	6.68271	6.5345	6.49201	6.50123	6.69427	6.50925	0.653103	-0.614616	+	D:\CHENYUWAN\20240212-dia-lumos\ddab-enps-1h-dia-label-fee\Blank-NPs-DIA-Label-free_D:\CHENYUWAN\20240212-dia-lumos\ddab-enps-1h-dia-label-fee\ddab-enps-1h-DIA-Label-free	3.57014	0.000772727	0.185018	12.0831	O43324	O43324	MCA3_HUMAN	Eukaryotic translation elongation factor 1 epsilon-1
7.90153	7.89696	7.90157	7.89246	7.89234	7.89904	7.90002	7.89461	0.987631	-0.0179561			0.939201	0.08335	0.00540558	2.00826	O43390	O43390	HNRPR_HUMAN	Heterogeneous nuclear ribonucleoprotein R
6.96174	6.94036	6.96209	6.94751	6.9448	6.94433	6.95473	6.94555	0.979077	-0.0305064			0.562156	0.219562	0.00918341	1.26651	O43395	O43395	PRPF3_HUMAN	U4/U6 small nuclear ribonucleoprotein Prp3
6.66554	6.74355	6.65552	6.7016	6.6721	6.64934	6.6882	6.67435	0.968602	-0.0460242			0.164701	0.816134	0.0138545	0.437427	O43396	O43396;K7ER96	TXNL1_HUMAN	Thioredoxin-like protein 1
6.82862	6.83541	6.82809	6.64557	6.68175	6.66541	6.83071	6.66424	0.681612	-0.552977	+	D:\CHENYUWAN\20240212-dia-lumos\ddab-enps-1h-dia-label-fee\Blank-NPs-DIA-Label-free_D:\CHENYUWAN\20240212-dia-lumos\ddab-enps-1h-dia-label-fee\ddab-enps-1h-DIA-Label-free	3.99764	0.000490879	0.166463	15.5227	O43399	O43399;A0A087WYR3	TPD54_HUMAN	Tumor protein D54
6.56814	6.57322	6.58662	6.50869	6.54292	6.51903	6.57599	6.52355	0.886244	-0.174224			1.98091	0.0109928	0.0524467	4.546	O43402	O43402;M0R1B0	EMC8_HUMAN	ER membrane protein complex subunit 8
5.25908	5.24916	5.30677	5.38218	5.24546	5.3378	5.27167	5.32181	1.12239	0.166571			0.497207	0.263909	-0.0501426	-1.13905	O43422	O43422	P52K_HUMAN	52 kDa repressor of the inhibitor of the protein kinase
5.67597	5.65777	5.76546	5.50847	5.39186	5.3891	5.69973	5.42981	0.537129	-0.896658	+	D:\CHENYUWAN\20240212-dia-lumos\ddab-enps-1h-dia-label-fee\Blank-NPs-DIA-Label-free_D:\CHENYUWAN\20240212-dia-lumos\ddab-enps-1h-dia-label-fee\ddab-enps-1h-DIA-Label-free	2.19744	0.00752432	0.269921	5.23846	O43427	O43427;E9PSD3;E9PJW6	FIBP_HUMAN	Acidic fibroblast growth factor intracellular-binding protein
6.09644	6.14905	6.09061	5.7849	5.85427	5.79878	6.11204	5.81265	0.501898	-0.994533	+	D:\CHENYUWAN\20240212-dia-lumos\ddab-enps-1h-dia-label-fee\Blank-NPs-DIA-Label-free_D:\CHENYUWAN\20240212-dia-lumos\ddab-enps-1h-dia-label-fee\ddab-enps-1h-DIA-Label-free	3.35181	0.00166703	0.299384	10.6214	O43432	O43432;A0A0A0MSA7;A0A0U1RQK7	IF4G3_HUMAN	Eukaryotic translation initiation factor 4 gamma 3
6.9969	6.98219	7.0126	7.01137	6.97904	6.99728	6.99723	6.9959	0.996938	-0.0044237			0.0351204	0.974752	0.00133228	0.103812	O43447	O43447;A6NM32;C9JQD4	PPIH_HUMAN	Peptidyl-prolyl cis-trans isomerase H
5.62171	NaN	5.70541	NaN	5.59318	5.52786	5.66356	5.56052	0.788793	-0.342282			0.717169	0.144397	0.103037	1.94088	O43462	O43462	MBTP2_HUMAN	Membrane-bound transcription factor site-2 protease
NaN	5.12528	4.70048	4.72121	NaN	4.71007	4.91288	4.71564	0.634981	-0.655214			0.345589	0.443042	0.197239	0.92832	O43463	O43463	SUV91_HUMAN	Histone-lysine N-methyltransferase SUV39H1
6.69482	6.67048	6.71202	6.7386	6.75042	6.75714	6.69244	6.74872	1.13836	0.186951			1.8841	0.0134109	-0.0562782	-4.25951	O43464	P83110;O43464;A0A0C4DG44	HTRA2_HUMAN	Serine protease HTRA2, mitochondrial
5.53252	5.62825	5.53145	5.74157	5.62491	5.58992	5.56407	5.65213	1.22478	0.292518			0.719655	0.143215	-0.0880566	-1.57357	O43474	O43474	KLF4_HUMAN	Krueppel-like factor 4
6.15815	6.15969	6.17386	6.22342	6.16235	6.23809	6.1639	6.20796	1.10677	0.146356			0.863776	0.100443	-0.0440575	-1.8572	O43488	O43488;H3BLU7	ARK72_HUMAN	Aflatoxin B1 aldehyde reductase member 2
6.57416	6.58267	6.58532	6.46666	6.45787	6.45525	6.58072	6.45993	0.757199	-0.401256	+	D:\CHENYUWAN\20240212-dia-lumos\ddab-enps-1h-dia-label-fee\Blank-NPs-DIA-Label-free_D:\CHENYUWAN\20240212-dia-lumos\ddab-enps-1h-dia-label-fee\ddab-enps-1h-DIA-Label-free	4.82268	0.000428135	0.12079	25.0645	O43491	O43491;E9PK52;E9PII3;E9PHY5	E41L2_HUMAN	Band 4.1-like protein 2
5.66542	5.65102	5.65649	5.5652	5.5188	5.5474	5.65764	5.5438	0.769413	-0.378171	+	D:\CHENYUWAN\20240212-dia-lumos\ddab-enps-1h-dia-label-fee\Blank-NPs-DIA-Label-free_D:\CHENYUWAN\20240212-dia-lumos\ddab-enps-1h-dia-label-fee\ddab-enps-1h-DIA-Label-free	2.88721	0.00295029	0.11384	8.04403	O43493	O43493;J3KQ45;F8W8W7	TGON2_HUMAN	Trans-Golgi network integral membrane protein 2
5.03222	NaN	5.06181	5.10785	5.18034	5.21047	5.04701	5.16622	1.31585	0.395992			1.21101	0.0450063	-0.119206	-2.9196	O43502	O43502;J3QLQ2;H7C1R0;J3QR58;J3QKK3	RA51C_HUMAN	DNA repair protein RAD51 homolog 3
6.10389	6.06646	6.12289	6.05482	6.04707	6.09562	6.09774	6.06584	0.929165	-0.105993			0.643241	0.175516	0.0319072	1.42462	O43504	O43504;E9PLX3;A0A0C4DGV4;R4GMU8	LTOR5_HUMAN	Ragulator complex protein LAMTOR5
5.92312	NaN	NaN	NaN	5.59963	5.90979	5.92312	5.75471	0.678554	-0.559464			0	1	0.168416	0	O43505	O43505	B4GA1_HUMAN	Beta-1,4-glucuronyltransferase 1
5.69856	5.80573	5.81408	5.65532	5.72157	5.66155	5.77279	5.67948	0.806662	-0.309965			1.02418	0.0698844	0.0933083	2.18151	O43513	O43513;E5RIE8	MED7_HUMAN	Mediator of RNA polymerase II transcription subunit 7
6.5283	6.53305	6.54219	5.96451	6.20622	6.07497	6.53451	6.0819	0.352686	-1.50354	+	D:\CHENYUWAN\20240212-dia-lumos\ddab-enps-1h-dia-label-fee\Blank-NPs-DIA-Label-free_D:\CHENYUWAN\20240212-dia-lumos\ddab-enps-1h-dia-label-fee\ddab-enps-1h-DIA-Label-free	2.53109	0.00522876	0.452612	6.46776	O43592	O43592;F8WDU6	XPOT_HUMAN	Exportin-T
5.26582	5.0842	5.13179	5.23534	4.98307	NaN	5.16061	5.1092	0.888374	-0.17076			0.160565	0.822378	0.051404	0.438115	O43598	O43598;H0Y8X4	DNPH1_HUMAN	2'-deoxynucleoside 5'-phosphate N-hydrolase 1
6.96357	6.97684	6.97436	6.9753	6.97799	6.98831	6.97159	6.98053	1.0208	0.0297047			0.719193	0.143476	-0.00894197	-1.57267	O43615	O43615;M0QXU7	TIM44_HUMAN	Mitochondrial import inner membrane translocase subunit TIM44
6.38563	6.33853	6.37549	6.18383	6.17842	6.18468	6.36655	6.18231	0.654276	-0.612029	+	D:\CHENYUWAN\20240212-dia-lumos\ddab-enps-1h-dia-label-fee\Blank-NPs-DIA-Label-free_D:\CHENYUWAN\20240212-dia-lumos\ddab-enps-1h-dia-label-fee\ddab-enps-1h-DIA-Label-free	3.66199	0.000548602	0.184239	12.7537	O43617	O43617;A0A087WWM0;A6NKE1	TPPC3_HUMAN	Trafficking protein particle complex subunit 3
6.7804	6.78599	6.76255	6.5839	6.65907	6.54809	6.77631	6.59702	0.661772	-0.595593	+	D:\CHENYUWAN\20240212-dia-lumos\ddab-enps-1h-dia-label-fee\Blank-NPs-DIA-Label-free_D:\CHENYUWAN\20240212-dia-lumos\ddab-enps-1h-dia-label-fee\ddab-enps-1h-DIA-Label-free	2.23275	0.00717264	0.179291	5.35875	O43633	O43633;M0R1L7;M0R1T5	CHM2A_HUMAN	Charged multivesicular body protein 2a
6.27305	6.25553	6.2616	6.26593	6.18649	6.21845	6.26339	6.22362	0.912497	-0.132109			0.775138	0.124477	0.0397687	1.68217	O43657	O43657;A0A087WZU5;A0A087WYV6	TSN6_HUMAN	Tetraspanin-6
6.76115	6.78243	6.7611	6.71915	6.72547	6.72302	6.76823	6.72254	0.900151	-0.151761	+	D:\CHENYUWAN\20240212-dia-lumos\ddab-enps-1h-dia-label-fee\Blank-NPs-DIA-Label-free_D:\CHENYUWAN\20240212-dia-lumos\ddab-enps-1h-dia-label-fee\ddab-enps-1h-DIA-Label-free	2.47002	0.00524669	0.0456851	6.22642	O43660	O43660;H0YAA2;H0YA24	PLRG1_HUMAN	Pleiotropic regulator 1
6.66103	6.64677	6.6559	6.63039	6.62169	6.63399	6.65457	6.62869	0.942151	-0.0859704			2.02102	0.0100915	0.0258794	4.66872	O43663	O43663	PRC1_HUMAN	Protein regulator of cytokinesis 1
6.98978	6.97998	6.97979	7.08947	7.07269	7.11586	6.98318	7.09267	1.28673	0.363711	+	D:\CHENYUWAN\20240212-dia-lumos\ddab-enps-1h-dia-label-fee\Blank-NPs-DIA-Label-free_D:\CHENYUWAN\20240212-dia-lumos\ddab-enps-1h-dia-label-fee\ddab-enps-1h-DIA-Label-free	2.9645	0.00263457	-0.109488	-8.42828	O43670	O43670;X6R4W8;J3QRS9;J3KS31	ZN207_HUMAN	BUB3-interacting and GLEBS motif-containing protein ZNF207
7.05192	7.08147	7.07007	7.05581	7.09112	7.07307	7.06782	7.07334	1.01278	0.0183249			0.15461	0.830199	-0.00551589	-0.413467	O43674	O43674;H0Y886;E7EWP0	NDUB5_HUMAN	NADH dehydrogenase [ubiquinone] 1 beta subcomplex subunit 5, mitochondrial
6.35656	6.33739	6.33425	6.33484	6.30876	6.31133	6.34273	6.31831	0.945309	-0.0811414			1.05897	0.0648838	0.0244263	2.25354	O43676	O43676	NDUB3_HUMAN	NADH dehydrogenase [ubiquinone] 1 beta subcomplex subunit 3
7.09424	7.09372	7.10238	7.12728	7.12945	7.11951	7.09678	7.12541	1.06815	0.0951134	+	D:\CHENYUWAN\20240212-dia-lumos\ddab-enps-1h-dia-label-fee\Blank-NPs-DIA-Label-free_D:\CHENYUWAN\20240212-dia-lumos\ddab-enps-1h-dia-label-fee\ddab-enps-1h-DIA-Label-free	2.64803	0.00405042	-0.0286318	-6.95238	O43678	O43678	NDUA2_HUMAN	NADH dehydrogenase [ubiquinone] 1 alpha subcomplex subunit 2
6.87481	6.85432	6.86924	6.80915	6.82819	6.8063	6.86613	6.81455	0.888014	-0.171345	+	D:\CHENYUWAN\20240212-dia-lumos\ddab-enps-1h-dia-label-fee\Blank-NPs-DIA-Label-free_D:\CHENYUWAN\20240212-dia-lumos\ddab-enps-1h-dia-label-fee\ddab-enps-1h-DIA-Label-free	2.30366	0.00650575	0.0515798	5.60693	O43681	O43681;A0A087WXS7	ASNA_HUMAN	ATPase ASNA1
7.07858	7.07224	7.09064	7.14096	7.11662	7.12648	7.08049	7.12802	1.11566	0.157897	+	D:\CHENYUWAN\20240212-dia-lumos\ddab-enps-1h-dia-label-fee\Blank-NPs-DIA-Label-free_D:\CHENYUWAN\20240212-dia-lumos\ddab-enps-1h-dia-label-fee\ddab-enps-1h-DIA-Label-free	2.22872	0.00714113	-0.0475316	-5.34491	O43684	O43684;J3QSX4;J3QT28	BUB3_HUMAN	Mitotic checkpoint protein BUB3
6.36811	6.29912	6.37797	6.40133	6.38443	6.41803	6.3484	6.40126	1.12944	0.17561			0.927618	0.0857071	-0.0528638	-1.98491	O43688	O43688;K7EMK9;A0A0J9YXA3	PLPP2_HUMAN	Phospholipid phosphatase 2
7.75632	7.76481	7.75573	7.76432	7.75514	7.76775	7.75895	7.76241	1.00798	0.0114695			0.293008	0.560371	-0.00345294	-0.723677	O43707	O43707;F5GXS2;H7C144	ACTN4_HUMAN	Alpha-actinin-4
5.73149	5.70184	5.68082	5.7382	5.58553	5.71289	5.70472	5.67887	0.942232	-0.0858464			0.201323	0.760864	0.0258417	0.522321	O43708	O43708;A0A0C4DFM0;G3V4T6;G3V267;G3V5T0;A0A0A0MR33	MAAI_HUMAN	Maleylacetoacetate isomerase
6.19713	6.05542	5.89268	6.26018	6.17182	6.28929	6.04841	6.24043	1.55603	0.637871			0.947941	0.0819806	-0.192019	-2.02592	O43709	O43709;E9PCQ7;F8WD87;F8WD67	WBS22_HUMAN	Probable 18S rRNA (guanine-N(7))-methyltransferase
5.34168	5.30796	5.34804	5.3513	5.09397	5.33993	5.33256	5.26173	0.849519	-0.235281			0.34593	0.442559	0.0708268	0.834597	O43711	O43711	TLX3_HUMAN	T-cell leukemia homeobox protein 3
6.11571	6.12263	6.14005	6.1722	6.18545	6.12737	6.12613	6.16167	1.08528	0.118067			0.870186	0.0988422	-0.0355414	-1.86995	O43715	O43715	TRIA1_HUMAN	TP53-regulated inhibitor of apoptosis 1
6.09568	6.04856	6.14743	6.10596	6.15269	6.10169	6.09722	6.12012	1.05413	0.0760511			0.280042	0.594556	-0.0228934	-0.69599	O43716	O43716;H0YIV9;F8VRU3	GATC_HUMAN	Glutamyl-tRNA(Gln) amidotransferase subunit C, mitochondrial
6.72915	6.71742	6.70608	6.71223	6.71224	6.74064	6.71755	6.7217	1.00961	0.0137926			0.131946	0.85828	-0.00415182	-0.358634	O43719	O43719;Q5H918;Q5H919	HTSF1_HUMAN	HIV Tat-specific factor 1
5.97806	5.93932	5.97738	6.04313	6.0251	6.05998	5.96492	6.04274	1.19623	0.258497	+	D:\CHENYUWAN\20240212-dia-lumos\ddab-enps-1h-dia-label-fee\Blank-NPs-DIA-Label-free_D:\CHENYUWAN\20240212-dia-lumos\ddab-enps-1h-dia-label-fee\ddab-enps-1h-DIA-Label-free	2.05581	0.00964859	-0.0778154	-4.77712	O43731	O43731	ERD23_HUMAN	ER lumen protein-retaining receptor 3
NaN	5.45449	5.4353	5.36875	NaN	5.16377	5.44489	5.26626	0.662777	-0.593404			0.648166	0.173296	0.178633	1.73532	O43739;Q15438;Q99418;Q9UIA0	Q15438;O43739;Q9UIA0;Q99418;K7ENQ8;F8W8E2;K7EKA2;K7ERV8;M0R2J0;A0A0D9SFG6;G5E9B7	CYH1_HUMAN;CYH2_HUMAN;CYH3_HUMAN;CYH4_HUMAN	Cytohesin-3
6.72888	6.71949	6.72159	6.6113	6.5972	6.59086	6.72332	6.59979	0.752425	-0.410381	+	D:\CHENYUWAN\20240212-dia-lumos\ddab-enps-1h-dia-label-fee\Blank-NPs-DIA-Label-free_D:\CHENYUWAN\20240212-dia-lumos\ddab-enps-1h-dia-label-fee\ddab-enps-1h-DIA-Label-free	4.29925	0.00029106	0.123537	18.5032	O43747	O43747	AP1G1_HUMAN	AP-1 complex subunit gamma-1
6.30501	6.32964	6.35047	6.28996	6.26561	6.33395	6.32837	6.29651	0.929253	-0.105857			0.595505	0.20089	0.0318661	1.33162	O43752	O43752	STX6_HUMAN	Syntaxin-6
6.92066	6.91526	6.92692	6.88483	6.89582	6.9136	6.92094	6.89808	0.948723	-0.0759415			1.18976	0.0473375	0.0228605	2.53093	O43760	O43760;K7ELD9;K7ENG9	SNG2_HUMAN	Synaptogyrin-2
NaN	6.87083	6.97793	6.82407	6.82813	6.61733	6.92438	6.75651	0.679411	-0.557643			0.729819	0.139211	0.167867	1.7074	O43765	O43765;K7EMD6	SGTA_HUMAN	Small glutamine-rich tetratricopeptide repeat-containing protein alpha
6.63458	6.60841	6.61112	6.6102	6.62478	6.63332	6.61804	6.62277	1.01096	0.0157216			0.166688	0.814086	-0.00473261	-0.442114	O43772	O43772;C9JPE1	MCAT_HUMAN	Mitochondrial carnitine/acylcarnitine carrier protein
6.83305	6.85147	6.81452	6.50712	6.51947	6.51918	6.83302	6.51525	0.481101	-1.05559	+	D:\CHENYUWAN\20240212-dia-lumos\ddab-enps-1h-dia-label-fee\Blank-NPs-DIA-Label-free_D:\CHENYUWAN\20240212-dia-lumos\ddab-enps-1h-dia-label-fee\ddab-enps-1h-DIA-Label-free	5.00391	0.000512821	0.317763	27.8345	O43776	O43776	SYNC_HUMAN	Asparagine--tRNA ligase, cytoplasmic
6.69462	6.69275	6.71009	6.72163	6.71364	6.71726	6.69915	6.71751	1.04318	0.0609906			1.43287	0.0309215	-0.01836	-3.08062	O43795	O43795;E7EQD9;E9PDF6	MYO1B_HUMAN	Unconventional myosin-Ib
6.64276	6.62591	6.64429	6.64915	6.62438	6.62114	6.63765	6.63156	0.986057	-0.0202571			0.224157	0.719804	0.00609795	0.573809	O43808	O43808;F8WE74;F8WEC6;B1AHN4	PM34_HUMAN	Peroxisomal membrane protein PMP34
7.33714	7.32871	7.32245	7.34671	7.35371	7.35318	7.32943	7.3512	1.0514	0.0723162			1.97283	0.0111656	-0.0217695	-4.52157	O43809	O43809;H3BV41;H3BND3	CPSF5_HUMAN	Cleavage and polyadenylation specificity factor subunit 5
6.74813	6.76226	6.76126	6.73717	6.71993	6.72269	6.75722	6.7266	0.931919	-0.101723			1.91859	0.0125574	0.0306217	4.36003	O43813	O43813;E9PHS0;F8WDS9	LANC1_HUMAN	LanC-like protein 1
5.85755	5.82914	5.87483	5.77386	5.76471	5.73753	5.85384	5.7587	0.80327	-0.316044	+	D:\CHENYUWAN\20240212-dia-lumos\ddab-enps-1h-dia-label-fee\Blank-NPs-DIA-Label-free_D:\CHENYUWAN\20240212-dia-lumos\ddab-enps-1h-dia-label-fee\ddab-enps-1h-DIA-Label-free	2.28082	0.00658357	0.0951389	5.52599	O43815	O43815	STRN_HUMAN	Striatin
7.1064	7.1145	7.1273	7.1327	7.12019	7.12456	7.11607	7.12581	1.02269	0.0323644			0.616045	0.189657	-0.00974274	-1.37165	O43818	O43818	U3IP2_HUMAN	U3 small nucleolar RNA-interacting protein 2
6.6761	6.69323	6.65987	6.73174	6.72453	6.71056	6.6764	6.72228	1.11142	0.152398			1.79296	0.0159947	-0.0458763	-4.00165	O43819	O43819	SCO2_HUMAN	Protein SCO2 homolog, mitochondrial
6.61686	6.58797	6.60118	6.57884	6.5643	6.60692	6.602	6.58335	0.957965	-0.0619551			0.548639	0.228178	0.0186502	1.24007	O43823	O43823	AKAP8_HUMAN	A-kinase anchor protein 8
6.11552	6.09905	6.10728	6.15069	6.15703	6.13941	6.10728	6.14904	1.10094	0.13873	+	D:\CHENYUWAN\20240212-dia-lumos\ddab-enps-1h-dia-label-fee\Blank-NPs-DIA-Label-free_D:\CHENYUWAN\20240212-dia-lumos\ddab-enps-1h-dia-label-fee\ddab-enps-1h-DIA-Label-free	2.39912	0.00581994	-0.041762	-5.95579	O43824	O43824;H0Y2S1	GTPB6_HUMAN	Putative GTP-binding protein 6
5.97826	5.9973	5.92967	6.01196	5.98024	5.93908	5.96841	5.97709	1.02019	0.0288332			0.107457	0.890056	-0.00867939	-0.297627	O43826	O43826;U3KPU7;U3KQS2	G6PT1_HUMAN	Glucose-6-phosphate exchanger SLC37A4
6.91375	6.87605	6.88737	6.92939	6.92687	6.92399	6.89239	6.92675	1.08234	0.114149			1.41864	0.0318095	-0.034362	-3.04704	O43837	O43837;A0A087X2E5;A0A087WZN1	IDH3B_HUMAN	Isocitrate dehydrogenase [NAD] subunit beta, mitochondrial
6.43249	6.34732	6.37945	6.19879	6.2196	6.25598	6.38642	6.22479	0.689242	-0.536917	+	D:\CHENYUWAN\20240212-dia-lumos\ddab-enps-1h-dia-label-fee\Blank-NPs-DIA-Label-free_D:\CHENYUWAN\20240212-dia-lumos\ddab-enps-1h-dia-label-fee\ddab-enps-1h-DIA-Label-free	2.24471	0.00692992	0.161628	5.39997	O43847	O43847;B1AKJ5;G3V1R5;F5H7V1	NRDC_HUMAN	Nardilysin
7.65774	7.65463	7.66222	7.51503	7.51071	7.51353	7.6582	7.51309	0.715964	-0.482042	+	D:\CHENYUWAN\20240212-dia-lumos\ddab-enps-1h-dia-label-fee\Blank-NPs-DIA-Label-free_D:\CHENYUWAN\20240212-dia-lumos\ddab-enps-1h-dia-label-fee\ddab-enps-1h-DIA-Label-free	6.24975	0	0.145109	57.1154	O43852	O43852;H0Y875	CALU_HUMAN	Calumenin
6.62992	6.64512	6.64643	6.69595	6.6865	6.66223	6.64049	6.68156	1.09918	0.136434			1.64942	0.0197731	-0.0410705	-3.61699	O43854	O43854	EDIL3_HUMAN	EGF-like repeat and discoidin I-like domain-containing protein 3
6.84768	6.81026	6.83753	6.85495	6.87252	6.87447	6.83182	6.86732	1.08516	0.117905			1.30106	0.0392338	-0.0354929	-2.77652	O43865	O43865	SAHH2_HUMAN	Adenosylhomocysteinase 2
6.04838	6.04518	6.08231	6.13017	6.12636	6.1015	6.05862	6.11934	1.15005	0.201701			1.81947	0.0153088	-0.0607177	-4.07552	O43913	O43913;G3V0H0	ORC5_HUMAN	Origin recognition complex subunit 5
6.58096	6.58049	6.57995	6.63858	6.62545	6.63667	6.58047	6.63356	1.13005	0.17639	+	D:\CHENYUWAN\20240212-dia-lumos\ddab-enps-1h-dia-label-fee\Blank-NPs-DIA-Label-free_D:\CHENYUWAN\20240212-dia-lumos\ddab-enps-1h-dia-label-fee\ddab-enps-1h-DIA-Label-free	3.68514	0.000556757	-0.0530987	-12.9283	O43920	O43920	NDUS5_HUMAN	NADH dehydrogenase [ubiquinone] iron-sulfur protein 5
6.16309	6.15502	6.13836	6.20102	6.16593	6.19984	6.15216	6.18893	1.08836	0.122154			1.26721	0.0415945	-0.0367719	-2.70081	O43929	O43929;CON_IPI00688419.1	ORC4_HUMAN	Origin recognition complex subunit 4
5.85089	5.79467	5.86253	5.82278	5.82739	5.89495	5.83603	5.84837	1.02882	0.0409937			0.14632	0.840511	-0.0123399	-0.393579	O43933	O43933;H7BZH3;A0A0C4DG33	PEX1_HUMAN	Peroxisome biogenesis factor 1
6.89206	6.88911	6.89571	6.90818	6.90768	6.91151	6.89229	6.90912	1.03952	0.0559202	+	D:\CHENYUWAN\20240212-dia-lumos\ddab-enps-1h-dia-label-fee\Blank-NPs-DIA-Label-free_D:\CHENYUWAN\20240212-dia-lumos\ddab-enps-1h-dia-label-fee\ddab-enps-1h-DIA-Label-free	2.7629	0.00371386	-0.0168336	-7.45903	O60216	O60216;E5RJK5;E5RJW1;E5RFV8;E5RIN7	RAD21_HUMAN	Double-strand-break repair protein rad21 homolog
6.77143	6.78631	6.7511	6.88024	6.85713	6.88432	6.76961	6.8739	1.27141	0.346425	+	D:\CHENYUWAN\20240212-dia-lumos\ddab-enps-1h-dia-label-fee\Blank-NPs-DIA-Label-free_D:\CHENYUWAN\20240212-dia-lumos\ddab-enps-1h-dia-label-fee\ddab-enps-1h-DIA-Label-free	2.85001	0.00318145	-0.104284	-7.86479	O60220	O60220	TIM8A_HUMAN	Mitochondrial import inner membrane translocase subunit Tim8 A
6.72199	6.71752	6.72644	6.79477	6.79803	6.79463	6.72198	6.79581	1.1853	0.24525	+	D:\CHENYUWAN\20240212-dia-lumos\ddab-enps-1h-dia-label-fee\Blank-NPs-DIA-Label-free_D:\CHENYUWAN\20240212-dia-lumos\ddab-enps-1h-dia-label-fee\ddab-enps-1h-DIA-Label-free	4.90855	0.000466667	-0.0738277	-26.3411	O60231	O60231;A0A140T947	DHX16_HUMAN	Putative pre-mRNA-splicing factor ATP-dependent RNA helicase DHX16
6.13856	6.14713	6.12234	5.8641	5.9171	5.9068	6.13601	5.896	0.575432	-0.797283	+	D:\CHENYUWAN\20240212-dia-lumos\ddab-enps-1h-dia-label-fee\Blank-NPs-DIA-Label-free_D:\CHENYUWAN\20240212-dia-lumos\ddab-enps-1h-dia-label-fee\ddab-enps-1h-DIA-Label-free	3.7589	0.00041573	0.240006	13.5	O60232	O60232;H0YEB6;H0YEK1;E9PK41	SSA27_HUMAN	Sjoegren syndrome/scleroderma autoantigen 1
6.47186	6.39581	6.44479	6.3968	6.37492	6.36988	6.43749	6.38053	0.8771	-0.189186			1.1282	0.0547175	0.0569504	2.39897	O60238	O60238;H0YBC7	BNI3L_HUMAN	BCL2/adenovirus E1B 19 kDa protein-interacting protein 3-like
6.19398	6.17817	6.18332	6.18392	6.16866	6.15924	6.18516	6.17061	0.967059	-0.0483241			0.783202	0.121696	0.014547	1.69801	O60244	O60244	MED14_HUMAN	Mediator of RNA polymerase II transcription subunit 14
5.73777	5.73947	5.73717	5.65653	5.65271	5.70809	5.73814	5.67244	0.859625	-0.218221			1.67209	0.0191036	0.0656904	3.67609	O60245	O60245;H0YAH0	PCDH7_HUMAN	Protocadherin-7
7.21137	7.20435	7.21066	7.20909	7.20606	7.20008	7.20879	7.20508	0.991483	-0.0123399			0.463719	0.293985	0.00371456	1.07278	O60264	O60264;P28370;B7ZLQ5;A0A0A0MRP6	SMCA5_HUMAN	SWI/SNF-related matrix-associated actin-dependent regulator of chromatin subfamily A member 5
5.62707	5.68554	5.50563	NaN	NaN	5.77027	5.60608	5.77027	1.45946	0.545437			0	1	-0.164193	0	O60266	O60266;C9JYB5;A0A0A0MSC1;H7C1A6;U3KQ91;C9JLX3	ADCY3_HUMAN	Adenylate cyclase type 3
6.03955	6.05121	6.01731	NaN	5.70103	5.37954	6.03602	5.54029	0.319349	-1.64679			1.58478	0.0222036	0.495734	4.11405	O60271	O60271;A0A087X2D8	JIP4_HUMAN	C-Jun-amino-terminal kinase-interacting protein 4
5.21891	5.2489	5.17518	5.30339	5.26095	5.2515	5.21433	5.27195	1.14188	0.191412			1.01283	0.0718301	-0.0576207	-2.15817	O60279	O60279;H7C2K7	SUSD5_HUMAN	Sushi domain-containing protein 5
6.43591	6.43063	6.42337	6.46789	6.46783	6.4746	6.42997	6.47011	1.09682	0.133326	+	D:\CHENYUWAN\20240212-dia-lumos\ddab-enps-1h-dia-label-fee\Blank-NPs-DIA-Label-free_D:\CHENYUWAN\20240212-dia-lumos\ddab-enps-1h-dia-label-fee\ddab-enps-1h-DIA-Label-free	3.14436	0.00216101	-0.0401352	-9.38832	O60287	O60287	NPA1P_HUMAN	Nucleolar pre-ribosomal-associated protein 1
6.46781	6.46903	6.52844	6.50574	6.43067	6.48962	6.48843	6.47534	0.97033	-0.043453			0.161991	0.820138	0.0130808	0.431017	O60293	O60293	ZC3H1_HUMAN	Zinc finger C3H1 domain-containing protein
6.70062	6.7124	6.69785	6.67096	6.65137	6.66804	6.70362	6.66346	0.911664	-0.133426	+	D:\CHENYUWAN\20240212-dia-lumos\ddab-enps-1h-dia-label-fee\Blank-NPs-DIA-Label-free_D:\CHENYUWAN\20240212-dia-lumos\ddab-enps-1h-dia-label-fee\ddab-enps-1h-DIA-Label-free	2.22009	0.0071694	0.0401653	5.31536	O60306	O60306	AQR_HUMAN	Intron-binding protein aquarius
NaN	NaN	5.33726	5.29399	NaN	NaN	5.33726	5.29399	0.90517	-0.14374			0	1	0.0432696	0	O60312	O60312	AT10A_HUMAN	Probable phospholipid-transporting ATPase VA
6.57984	6.57871	6.58826	6.56971	6.58602	6.5883	6.58227	6.58134	0.997875	-0.00306946			0.0481166	0.95948	0.00092411	0.140408	O60313	O60313;E5KLJ6;E5KLJ9;E5KLK1;E5KLJ5;C9JMB8;A8MXB6	OPA1_HUMAN	Dynamin-like 120 kDa protein, mitochondrial
6.39269	6.4051	6.37944	6.43164	6.38481	6.38175	6.39241	6.3994	1.01623	0.023228			0.146348	0.840832	-0.00699218	-0.393646	O60318	O60318	GANP_HUMAN	Germinal-center associated nuclear protein
5.36821	5.50934	5.39361	5.2858	5.33047	5.23288	5.42372	5.28305	0.723319	-0.467296			1.27417	0.0410831	0.14067	2.71629	O60333;Q12756	Q12756;O60333;O43896;Q4R9M9;F8W8V9;H7C0K6;A0A087WWA3	KIF1A_HUMAN;KIF1B_HUMAN	Kinesin-like protein KIF1B
5.76526	5.68866	5.6595	5.58391	5.47001	5.47896	5.70447	5.51096	0.640458	-0.642825			1.79507	0.0158418	0.193509	4.00749	O60337	O60337;A0A0B4J206	MARH6_HUMAN	E3 ubiquitin-protein ligase MARCH6
6.97928	6.97823	6.979	7.00466	7.00176	7.01383	6.97884	7.00675	1.06638	0.0927239	+	D:\CHENYUWAN\20240212-dia-lumos\ddab-enps-1h-dia-label-fee\Blank-NPs-DIA-Label-free_D:\CHENYUWAN\20240212-dia-lumos\ddab-enps-1h-dia-label-fee\ddab-enps-1h-DIA-Label-free	2.8033	0.00347475	-0.0279131	-7.64479	O60341	O60341;R4GMQ1	KDM1A_HUMAN	Lysine-specific histone demethylase 1A
5.50324	5.52621	5.49818	NaN	NaN	5.20432	5.50921	5.20432	0.495568	-1.01284			0	1	0.304897	0	O60343	O60343;Q5JU47	TBCD4_HUMAN	TBC1 domain family member 4
5.97245	5.93811	6.01201	5.82273	5.90982	5.85853	5.97419	5.86369	0.775359	-0.367064			1.53995	0.0240985	0.110497	3.33971	O60353	O60353;G5EA13	FZD6_HUMAN	Frizzled-6
7.13791	7.10553	7.11347	7.15708	7.16491	7.15482	7.11897	7.15893	1.09638	0.13275			1.76075	0.0166889	-0.0399613	-3.91313	O60361	P22392;O60361;Q32Q12	NDK8_HUMAN	Putative nucleoside diphosphate kinase
6.34917	6.38984	6.3747	6.43983	6.40787	6.44499	6.37123	6.4309	1.14726	0.198191			1.64048	0.0202571	-0.0596614	-3.59384	O60427	O60427;A0A0A0MR51;H7C2V0;H0YB97	FADS1_HUMAN	Fatty acid desaturase 1
6.37611	6.36771	6.39982	6.4315	6.40211	6.4066	6.38122	6.4134	1.07692	0.106916			1.14108	0.0532137	-0.0321848	-2.42636	O60437	O60437;K7EKI8	PEPL_HUMAN	Periplakin
6.03265	6.07801	6.01362	6.0878	6.08531	6.04681	6.04143	6.07331	1.07617	0.105906			0.615627	0.1899	-0.0318813	-1.37084	O60476	O60476	MA1A2_HUMAN	Mannosyl-oligosaccharide 1,2-alpha-mannosidase IB
7.02517	7.01999	7.02902	6.98861	6.99688	7.01108	7.02473	6.99886	0.942171	-0.0859394			1.66664	0.0191118	0.0258705	3.66183	O60488	O60488;D6RF95;D6RD96	ACSL4_HUMAN	Long-chain-fatty-acid--CoA ligase 4
6.80457	6.7953	6.80779	6.58895	6.62053	6.59479	6.80256	6.60142	0.629316	-0.668143	+	D:\CHENYUWAN\20240212-dia-lumos\ddab-enps-1h-dia-label-fee\Blank-NPs-DIA-Label-free_D:\CHENYUWAN\20240212-dia-lumos\ddab-enps-1h-dia-label-fee\ddab-enps-1h-DIA-Label-free	4.37581	0.0003125	0.201131	19.3448	O60493	O60493	SNX3_HUMAN	Sorting nexin-3
6.52427	6.49682	6.49454	6.56821	6.47334	6.44737	6.50521	6.49631	0.979704	-0.0295818			0.0830287	0.919925	0.00890525	0.234676	O60499	O43752;O60499	STX10_HUMAN	Syntaxin-10
6.01194	5.98308	6.00364	5.86419	5.84326	5.81393	5.99955	5.84046	0.693279	-0.528491	+	D:\CHENYUWAN\20240212-dia-lumos\ddab-enps-1h-dia-label-fee\Blank-NPs-DIA-Label-free_D:\CHENYUWAN\20240212-dia-lumos\ddab-enps-1h-dia-label-fee\ddab-enps-1h-DIA-Label-free	3.14746	0.00216521	0.159092	9.40575	O60502	O60502	OGA_HUMAN	Protein O-GlcNAcase
5.98881	5.97881	5.97581	5.97775	5.96658	6.01555	5.98115	5.98663	1.0127	0.0182053			0.131458	0.858637	-0.00547981	-0.357439	O60503	O60503	ADCY9_HUMAN	Adenylate cyclase type 9
5.99109	5.96999	5.91577	5.76722	NaN	5.84745	5.95895	5.80733	0.705312	-0.503667			1.44757	0.0298338	0.151619	3.64245	O60504	O60504;H0YB51;H0YAZ3;E5RJP2	VINEX_HUMAN	Vinexin
7.75333	7.74038	7.75154	7.65798	7.65978	7.67121	7.74842	7.66299	0.821445	-0.283765	+	D:\CHENYUWAN\20240212-dia-lumos\ddab-enps-1h-dia-label-fee\Blank-NPs-DIA-Label-free_D:\CHENYUWAN\20240212-dia-lumos\ddab-enps-1h-dia-label-fee\ddab-enps-1h-DIA-Label-free	3.90933	0.000463224	0.0854217	14.7424	O60506	O60506;B7Z645;F6UXX1	HNRPQ_HUMAN	Heterogeneous nuclear ribonucleoprotein Q
6.25201	6.31272	6.28442	6.33529	6.31114	6.29754	6.28305	6.31466	1.0755	0.105007			0.694911	0.152278	-0.0316108	-1.52529	O60508	O60508	PRP17_HUMAN	Pre-mRNA-processing factor 17
5.48965	5.40471	5.47315	5.39728	5.3715	5.86188	5.45584	5.54355	1.2238	0.291372			0.210568	0.745405	-0.0877117	-0.543291	O60512	O60512	B4GT3_HUMAN	Beta-1,4-galactosyltransferase 3
6.10345	6.11493	6.09462	6.04407	6.06668	6.14288	6.10433	6.08454	0.955454	-0.0657421			0.258593	0.646362	0.0197902	0.649676	O60518	O60518	RNBP6_HUMAN	Ran-binding protein 6
5.97453	6.12159	6.02808	5.50201	NaN	5.74824	6.0414	5.62512	0.383462	-1.38285			1.51886	0.0252163	0.416278	3.88218	O60524	O60524;G3V5V3;G3V4D9	NEMF_HUMAN	Nuclear export mediator factor NEMF
6.31116	6.31283	6.28402	6.32644	6.29689	6.33725	6.30267	6.32019	1.04117	0.0582013			0.502076	0.259545	-0.0175207	-1.14864	O60563	O60563	CCNT1_HUMAN	Cyclin-T1
7.50983	7.50202	7.49696	7.38381	7.39801	7.39143	7.50294	7.39108	0.77294	-0.371572	+	D:\CHENYUWAN\20240212-dia-lumos\ddab-enps-1h-dia-label-fee\Blank-NPs-DIA-Label-free_D:\CHENYUWAN\20240212-dia-lumos\ddab-enps-1h-dia-label-fee\ddab-enps-1h-DIA-Label-free	4.44494	0.000328638	0.111854	20.137	O60568	O60568;H7C2S8	PLOD3_HUMAN	Procollagen-lysine,2-oxoglutarate 5-dioxygenase 3
5.41823	5.3926	5.43044	5.43568	5.46836	5.44344	5.41376	5.44916	1.08493	0.117602			1.1185	0.0561714	-0.0354012	-2.37841	O60573	O60573;B4E1E4;B8ZZL3;B9A023;B8ZZ50;B9A044;C9JEL3	IF4E2_HUMAN	Eukaryotic translation initiation factor 4E type 2
6.44495	6.41235	6.42806	6.1621	6.17243	6.14413	6.42845	6.15955	0.538395	-0.893263	+	D:\CHENYUWAN\20240212-dia-lumos\ddab-enps-1h-dia-label-fee\Blank-NPs-DIA-Label-free_D:\CHENYUWAN\20240212-dia-lumos\ddab-enps-1h-dia-label-fee\ddab-enps-1h-DIA-Label-free	4.55489	0.000352645	0.268899	21.4632	O60610	O60610;H9KV28;A0A0G2JH68;A0A140T8Z0	DIAP1_HUMAN	Protein diaphanous homolog 1
5.32167	NaN	5.31979	NaN	4.92855	NaN	5.32073	4.92855	0.40534	-1.3028			0	1	0.39218	0	O60613	O60613;A0A087X1G7;A0A0B4J1S4	SEP15_HUMAN	15 kDa selenoprotein
6.65604	6.70264	6.69948	6.60786	6.63693	6.5072	6.68605	6.584	0.790575	-0.339025			1.14052	0.0532233	0.102057	2.42518	O60637	O60637	TSN3_HUMAN	Tetraspanin-3
6.28388	6.26785	6.29636	5.94581	5.97419	5.97495	6.2827	5.96498	0.481156	-1.05542	+	D:\CHENYUWAN\20240212-dia-lumos\ddab-enps-1h-dia-label-fee\Blank-NPs-DIA-Label-free_D:\CHENYUWAN\20240212-dia-lumos\ddab-enps-1h-dia-label-fee\ddab-enps-1h-DIA-Label-free	4.82585	0.000433437	0.317714	25.1105	O60645	O60645	EXOC3_HUMAN	Exocyst complex component 3
6.5925	6.59634	6.6022	6.54584	6.53884	6.53695	6.59701	6.54054	0.878074	-0.187586	+	D:\CHENYUWAN\20240212-dia-lumos\ddab-enps-1h-dia-label-fee\Blank-NPs-DIA-Label-free_D:\CHENYUWAN\20240212-dia-lumos\ddab-enps-1h-dia-label-fee\ddab-enps-1h-DIA-Label-free	3.87602	0.000450533	0.056469	14.4581	O60664	O60664;K7ERZ3;K7EL96;K7ER39	PLIN3_HUMAN	Perilipin-3
6.23513	6.23276	6.23613	6.24037	6.25705	6.25393	6.23467	6.25045	1.03701	0.0524256			1.40942	0.0324125	-0.0157817	-3.0254	O60669	O60669;F8VS95;F8W0N3	MOT2_HUMAN	Monocarboxylate transporter 2
6.49678	6.47327	6.52115	6.30553	6.29501	6.35747	6.49707	6.31934	0.664156	-0.590405	+	D:\CHENYUWAN\20240212-dia-lumos\ddab-enps-1h-dia-label-fee\Blank-NPs-DIA-Label-free_D:\CHENYUWAN\20240212-dia-lumos\ddab-enps-1h-dia-label-fee\ddab-enps-1h-DIA-Label-free	2.76859	0.00365204	0.17773	7.48494	O60675	O15525;O60675	MAFK_HUMAN	Transcription factor MafK
5.46462	5.40786	5.46249	5.16078	5.03945	4.99788	5.44499	5.06604	0.417875	-1.25886	+	D:\CHENYUWAN\20240212-dia-lumos\ddab-enps-1h-dia-label-fee\Blank-NPs-DIA-Label-free_D:\CHENYUWAN\20240212-dia-lumos\ddab-enps-1h-dia-label-fee\ddab-enps-1h-DIA-Label-free	2.71609	0.00382379	0.378954	7.24875	O60678	O60678;A0A0A0MSN7	ANM3_HUMAN	Protein arginine N-methyltransferase 3
7.01883	7.01098	7.02482	6.85848	6.84937	6.86478	7.01821	6.85754	0.690771	-0.53372	+	D:\CHENYUWAN\20240212-dia-lumos\ddab-enps-1h-dia-label-fee\Blank-NPs-DIA-Label-free_D:\CHENYUWAN\20240212-dia-lumos\ddab-enps-1h-dia-label-fee\ddab-enps-1h-DIA-Label-free	4.93564	0.000479452	0.160666	26.7571	O60684	O60684	IMA7_HUMAN	Importin subunit alpha-7
6.73156	6.73331	6.73044	6.82844	6.82654	6.80638	6.73177	6.82045	1.22655	0.294602	+	D:\CHENYUWAN\20240212-dia-lumos\ddab-enps-1h-dia-label-fee\Blank-NPs-DIA-Label-free_D:\CHENYUWAN\20240212-dia-lumos\ddab-enps-1h-dia-label-fee\ddab-enps-1h-DIA-Label-free	3.62425	0.000794805	-0.0886839	-12.474	O60701	O60701	UGDH_HUMAN	UDP-glucose 6-dehydrogenase
7.10942	7.11466	7.10175	7.12274	7.11245	7.11563	7.10861	7.11694	1.01937	0.0276794			0.797397	0.116936	-0.00833209	-1.72592	O60716	O60716;E9PRE2;C9JZR2	CTND1_HUMAN	Catenin delta-1
NaN	5.44982	5.49575	5.49158	NaN	NaN	5.47278	5.49158	1.04424	0.0624522			0	1	-0.0188003	0	O60721	O60721;F5H127;F5H483	NCKX1_HUMAN	Sodium/potassium/calcium exchanger 1
6.07242	6.05392	6.14123	6.05936	6.05874	6.07968	6.08919	6.06593	0.947847	-0.0772736			0.352315	0.432368	0.0232615	0.847783	O60725	O60725	ICMT_HUMAN	Protein-S-isoprenylcysteine O-methyltransferase
6.09065	6.1014	6.10574	5.83838	5.85802	5.852	6.09926	5.84947	0.562606	-0.829802	+	D:\CHENYUWAN\20240212-dia-lumos\ddab-enps-1h-dia-label-fee\Blank-NPs-DIA-Label-free_D:\CHENYUWAN\20240212-dia-lumos\ddab-enps-1h-dia-label-fee\ddab-enps-1h-DIA-Label-free	5.35142	0	0.249795	34.0226	O60749	O60749	SNX2_HUMAN	Sorting nexin-2
7.29845	7.29796	7.29693	7.23949	7.24603	7.22858	7.29778	7.23803	0.87146	-0.198494	+	D:\CHENYUWAN\20240212-dia-lumos\ddab-enps-1h-dia-label-fee\Blank-NPs-DIA-Label-free_D:\CHENYUWAN\20240212-dia-lumos\ddab-enps-1h-dia-label-fee\ddab-enps-1h-DIA-Label-free	3.5144	0.00125547	0.0597528	11.6928	O60762	O60762;Q5QPK2;Q5QPJ9;H0Y368	DPM1_HUMAN	Dolichol-phosphate mannosyltransferase subunit 1
6.37642	6.37134	6.33919	6.21725	6.18544	6.20216	6.36232	6.20162	0.690714	-0.533839	+	D:\CHENYUWAN\20240212-dia-lumos\ddab-enps-1h-dia-label-fee\Blank-NPs-DIA-Label-free_D:\CHENYUWAN\20240212-dia-lumos\ddab-enps-1h-dia-label-fee\ddab-enps-1h-DIA-Label-free	3.38435	0.00169317	0.160701	10.8281	O60763	O60763	USO1_HUMAN	General vesicular transport factor p115
6.36506	6.3313	6.29517	6.3284	6.35596	6.3704	6.33051	6.35159	1.04973	0.0700163			0.373634	0.399175	-0.0210772	-0.891536	O60783	O60783	RT14_HUMAN	28S ribosomal protein S14, mitochondrial
6.05893	6.05563	6.05624	5.8276	5.76492	5.79196	6.05693	5.79483	0.546883	-0.870695	+	D:\CHENYUWAN\20240212-dia-lumos\ddab-enps-1h-dia-label-fee\Blank-NPs-DIA-Label-free_D:\CHENYUWAN\20240212-dia-lumos\ddab-enps-1h-dia-label-fee\ddab-enps-1h-DIA-Label-free	3.87118	0.000447806	0.262105	14.4173	O60784	O60784	TOM1_HUMAN	Target of Myb protein 1
8.56861	8.61269	8.56807	8.63286	8.62392	8.62628	8.58312	8.62769	1.10806	0.148041			1.38404	0.0336974	-0.0445646	-2.96617	O60814;P57053;P58876;P62807;Q5QNW6;Q93079;Q99877;Q99879	P33778;P58876;P06899;P57053;Q99877;Q93079;Q16778;P62807;O60814;Q99880;P23527;Q99879;Q5QNW6;U3KQK0	H2B1C_HUMAN;H2B1D_HUMAN;H2B1H_HUMAN;H2B1K_HUMAN;H2B1M_HUMAN;H2B1N_HUMAN;H2B2F_HUMAN;H2BFS_HUMAN	Histone H2B type 1-K
5.47752	5.45095	5.40355	NaN	5.13476	5.18996	5.444	5.16236	0.522821	-0.93561	+	D:\CHENYUWAN\20240212-dia-lumos\ddab-enps-1h-dia-label-fee\Blank-NPs-DIA-Label-free_D:\CHENYUWAN\20240212-dia-lumos\ddab-enps-1h-dia-label-fee\ddab-enps-1h-DIA-Label-free	2.40842	0.00572158	0.281647	8.12003	O60826	O60826	CCD22_HUMAN	Coiled-coil domain-containing protein 22
6.91635	6.97322	6.94747	7.06427	7.06239	7.0246	6.94568	7.05042	1.27274	0.34794	+	D:\CHENYUWAN\20240212-dia-lumos\ddab-enps-1h-dia-label-fee\Blank-NPs-DIA-Label-free_D:\CHENYUWAN\20240212-dia-lumos\ddab-enps-1h-dia-label-fee\ddab-enps-1h-DIA-Label-free	2.12801	0.00851438	-0.10474	-5.00818	O60828	O60828;H7C053	PQBP1_HUMAN	Polyglutamine-binding protein 1
6.09129	6.03893	6.03997	6.06162	6.09279	6.05327	6.05673	6.06923	1.0292	0.0415175			0.233044	0.702133	-0.0124979	-0.593582	O60830	O60830;V9GYU0;V9GYS0	TI17B_HUMAN	Mitochondrial import inner membrane translocase subunit Tim17-B
7.08673	7.0743	7.06863	7.03687	7.03271	7.0397	7.07655	7.03643	0.911743	-0.1333	+	D:\CHENYUWAN\20240212-dia-lumos\ddab-enps-1h-dia-label-fee\Blank-NPs-DIA-Label-free_D:\CHENYUWAN\20240212-dia-lumos\ddab-enps-1h-dia-label-fee\ddab-enps-1h-DIA-Label-free	2.66338	0.004	0.0401276	7.01829	O60831	O60831;A6NM71	PRAF2_HUMAN	PRA1 family protein 2
7.41504	7.4029	7.41583	7.43133	7.43713	7.42252	7.41126	7.43033	1.04489	0.0633492			1.48242	0.0273802	-0.0190703	-3.19909	O60832	O60832;C9IYT0;H7C2Q2	DKC1_HUMAN	H/ACA ribonucleoprotein complex subunit 4
6.79416	6.782	6.7806	6.56912	6.58206	6.57209	6.78559	6.57442	0.614944	-0.701473	+	D:\CHENYUWAN\20240212-dia-lumos\ddab-enps-1h-dia-label-fee\Blank-NPs-DIA-Label-free_D:\CHENYUWAN\20240212-dia-lumos\ddab-enps-1h-dia-label-fee\ddab-enps-1h-DIA-Label-free	5.46323	0	0.211164	36.2907	O60841	O60841;A0A087WUT6	IF2P_HUMAN	Eukaryotic translation initiation factor 5B
5.09879	NaN	4.93183	5.15123	5.11892	5.17658	5.01531	5.14891	1.3602	0.443814			0.868181	0.0993424	-0.133601	-2.02909	O60858	O60858;X6R9U5	TRI13_HUMAN	E3 ubiquitin-protein ligase TRIM13
6.75706	6.77614	6.7983	6.56948	6.59267	6.5797	6.77717	6.58062	0.635989	-0.652926	+	D:\CHENYUWAN\20240212-dia-lumos\ddab-enps-1h-dia-label-fee\Blank-NPs-DIA-Label-free_D:\CHENYUWAN\20240212-dia-lumos\ddab-enps-1h-dia-label-fee\ddab-enps-1h-DIA-Label-free	3.86601	0.000444444	0.19655	14.3737	O60869	O60869	EDF1_HUMAN	Endothelial differentiation-related factor 1
6.10872	6.18074	6.10951	6.06888	6.12123	6.05537	6.13299	6.08183	0.888863	-0.169966			0.753532	0.131609	0.0511649	1.63981	O60870	O60870	KIN17_HUMAN	DNA/RNA-binding protein KIN17
6.42785	6.43197	6.42684	6.29318	6.30624	6.31448	6.42889	6.30463	0.751183	-0.412764	+	D:\CHENYUWAN\20240212-dia-lumos\ddab-enps-1h-dia-label-fee\Blank-NPs-DIA-Label-free_D:\CHENYUWAN\20240212-dia-lumos\ddab-enps-1h-dia-label-fee\ddab-enps-1h-DIA-Label-free	4.3834	0.000314607	0.124254	19.4304	O60884	O60884;A0A087WT48	DNJA2_HUMAN	DnaJ homolog subfamily A member 2
6.76159	6.76699	6.76383	6.74331	6.73547	6.73793	6.76414	6.7389	0.943548	-0.0838322	+	D:\CHENYUWAN\20240212-dia-lumos\ddab-enps-1h-dia-label-fee\Blank-NPs-DIA-Label-free_D:\CHENYUWAN\20240212-dia-lumos\ddab-enps-1h-dia-label-fee\ddab-enps-1h-DIA-Label-free	3.07909	0.00233086	0.025236	9.02885	O60885	O60885	BRD4_HUMAN	Bromodomain-containing protein 4
6.7889	6.70958	6.8245	6.85418	6.8541	6.81328	6.77433	6.84052	1.16464	0.219883			0.839362	0.106485	-0.0661915	-1.80876	O60888	O60888;C9IZG4	CUTA_HUMAN	Protein CutA
5.90474	5.90538	5.92994	5.84493	5.84077	5.77636	5.91335	5.82069	0.807851	-0.30784			1.7599	0.0166744	0.0926689	3.91081	O60925	O60925;E5RGS4	PFD1_HUMAN	Prefoldin subunit 1
5.38225	5.35104	5.42897	5.49267	5.48964	5.47399	5.38742	5.48543	1.25317	0.325587			1.86106	0.0141385	-0.0980115	-4.19326	O60930	O60930	RNH1_HUMAN	Ribonuclease H1
6.46628	6.47536	6.47704	6.50718	6.49025	6.50312	6.47289	6.50018	1.06485	0.0906532			1.95684	0.0115956	-0.0272895	-4.47351	O60934	O60934;E5RGU1	NBN_HUMAN	Nibrin
5.57324	5.56983	5.65032	5.57853	5.57656	5.56568	5.5978	5.57359	0.945783	-0.0804183			0.382993	0.386195	0.0242081	0.910623	O60936	O60936;H3BQJ5;H3BUP2;H3BUN4;H3BM67	NOL3_HUMAN	Nucleolar protein 3
5.45307	5.50712	NaN	5.62999	5.66719	5.66017	5.4801	5.65245	1.48714	0.572543	+	D:\CHENYUWAN\20240212-dia-lumos\ddab-enps-1h-dia-label-fee\Blank-NPs-DIA-Label-free_D:\CHENYUWAN\20240212-dia-lumos\ddab-enps-1h-dia-label-fee\ddab-enps-1h-DIA-Label-free	2.20604	0.00736773	-0.172353	-6.90589	O60942	O60942	MCE1_HUMAN	mRNA-capping enzyme
6.52606	6.51602	6.5357	6.56815	6.54878	6.54552	6.52592	6.55415	1.06714	0.0937515			1.44661	0.0297786	-0.0282222	-3.11324	O75027	O75027;B4DGL8;A0A087WW65	ABCB7_HUMAN	ATP-binding cassette sub-family B member 7, mitochondrial
5.7388	5.74706	5.69637	NaN	5.06126	NaN	5.72741	5.06126	0.2157	-2.2129			0	1	0.666149	0	O75030	P19532;O14948;P19484;O75030;B1AKB4;B7Z757;B1AKB5;B0QYS7;A0A1B0GXL9;B0QYS6;C9JBI8	MITF_HUMAN	Microphthalmia-associated transcription factor
5.31363	5.26252	5.28017	5.12014	NaN	NaN	5.28544	5.12014	0.683436	-0.549122			0	1	0.165302	0	O75044;P0DJJ0;P0DMP2	Q7Z6B7;O75044;P0DJJ0;P0DMP2;A2RUF3;B7ZM87;G5EA48;A0A075B7B5;A0A075B743;A0A075B7C8	SRG2B_HUMAN;SRG2C_HUMAN;SRGP2_HUMAN	SLIT-ROBO Rho GTPase-activating protein 2
4.62729	NaN	NaN	4.90938	NaN	4.94732	4.62729	4.92835	2.00013	1.00009			0	1	-0.301058	0	O75051	O75051	PLXA2_HUMAN	Plexin-A2
5.85838	5.78428	5.81574	4.80906	5.80215	5.85637	5.81947	5.48919	0.46744	-1.09715			0.411452	0.349246	0.330274	0.968255	O75054	O75054	IGSF3_HUMAN	Immunoglobulin superfamily member 3
6.07336	6.12028	6.04921	6.11503	6.12852	6.07814	6.08095	6.10723	1.06237	0.0872925			0.43794	0.318782	-0.0262777	-1.02142	O75063	O75063	XYLK_HUMAN	Glycosaminoglycan xylosylkinase
7.00014	7.00903	6.98725	6.70729	6.70326	6.72423	6.99881	6.71159	0.516158	-0.954114	+	D:\CHENYUWAN\20240212-dia-lumos\ddab-enps-1h-dia-label-fee\Blank-NPs-DIA-Label-free_D:\CHENYUWAN\20240212-dia-lumos\ddab-enps-1h-dia-label-fee\ddab-enps-1h-DIA-Label-free	5.23816	0	0.287217	31.8688	O75083	O75083	WDR1_HUMAN	WD repeat-containing protein 1
6.04857	6.07392	6.12025	6.13676	6.13461	6.12998	6.08091	6.13378	1.12946	0.175635			1.17915	0.0486422	-0.0528714	-2.508	O75084;Q14332	O75084;Q14332	FZD2_HUMAN;FZD7_HUMAN	Frizzled-7
6.81674	6.80073	6.81047	6.77771	6.77977	6.78801	6.80931	6.78183	0.93868	-0.0912954	+	D:\CHENYUWAN\20240212-dia-lumos\ddab-enps-1h-dia-label-fee\Blank-NPs-DIA-Label-free_D:\CHENYUWAN\20240212-dia-lumos\ddab-enps-1h-dia-label-fee\ddab-enps-1h-DIA-Label-free	2.09143	0.0091	0.0274828	4.89006	O75110	O75110;A0A0A0MR22	ATP9A_HUMAN	Probable phospholipid-transporting ATPase IIA
6.27299	6.31235	6.28095	5.9185	5.87529	5.89911	6.28876	5.89763	0.406321	-1.29931	+	D:\CHENYUWAN\20240212-dia-lumos\ddab-enps-1h-dia-label-fee\Blank-NPs-DIA-Label-free_D:\CHENYUWAN\20240212-dia-lumos\ddab-enps-1h-dia-label-fee\ddab-enps-1h-DIA-Label-free	4.64129	0.00037234	0.391131	22.5655	O75116	O75116;Q14DU5;E9PF63	ROCK2_HUMAN	Rho-associated protein kinase 2
5.48639	5.6039	5.45592	5.54296	5.52728	5.52517	5.5154	5.5318	1.03849	0.0544863			0.13282	0.857288	-0.0164019	-0.360776	O75122	O75122;B3KR06;D6RBU8;E7ERI8;E7ENG2;E7EW49;A0A0U1RQI6;J3KR49;E3W994	CLAP2_HUMAN	CLIP-associating protein 2
6.4351	6.42684	6.44466	6.46198	6.49287	6.49073	6.43553	6.48186	1.11256	0.153887			1.83941	0.0147789	-0.046325	-4.13168	O75127	O75127;G3V325	PTCD1_HUMAN	Pentatricopeptide repeat-containing protein 1, mitochondrial
6.31791	6.34987	6.40848	6.23448	6.26106	6.26292	6.35875	6.25282	0.783549	-0.351904			1.70938	0.0181532	0.105934	3.77463	O75128	O75128;J3KR05	COBL_HUMAN	Protein cordon-bleu
6.5937	6.57698	6.57834	6.31492	6.35137	6.32312	6.58301	6.3298	0.558204	-0.841137	+	D:\CHENYUWAN\20240212-dia-lumos\ddab-enps-1h-dia-label-fee\Blank-NPs-DIA-Label-free_D:\CHENYUWAN\20240212-dia-lumos\ddab-enps-1h-dia-label-fee\ddab-enps-1h-DIA-Label-free	4.48662	0.000338983	0.253207	20.6301	O75131	O75131;A0A087WYQ3;E5RHZ0;H0YB26	CPNE3_HUMAN	Copine-3
5.45253	5.47336	5.30371	5.45188	5.35964	5.48638	5.40987	5.43263	1.05382	0.0756348			0.127555	0.862989	-0.0227685	-0.347838	O75144	O75144;K4DIA0;A0A087X1L8	ICOSL_HUMAN	ICOS ligand
6.67596	6.65348	6.69501	6.61243	6.63286	6.60253	6.67482	6.61594	0.873216	-0.19559			1.76904	0.0164553	0.0588787	3.93579	O75146	O00291;O75146	HIP1R_HUMAN	Huntingtin-interacting protein 1-related protein
6.68673	6.65481	6.75398	6.53469	6.52953	NaN	6.69851	6.53211	0.681712	-0.552765			1.66339	0.0192521	0.166398	4.40423	O75147	O75147;S4R463;H0Y684;A6NN50	OBSL1_HUMAN	Obscurin-like protein 1
6.43572	6.42748	6.42029	6.44005	6.43123	6.4394	6.42783	6.4369	1.02109	0.0301122			0.792184	0.11882	-0.00906467	-1.71566	O75150	O75150;I3L332;H3BP71;H3BQ99;H3BUL6	BRE1B_HUMAN	E3 ubiquitin-protein ligase BRE1B
5.63457	5.76963	5.63222	5.85205	5.82644	5.72926	5.67881	5.80258	1.32976	0.411171			0.986291	0.0764917	-0.123775	-2.10382	O75151	O75151	PHF2_HUMAN	Lysine-specific demethylase PHF2
6.75227	6.76136	6.7561	6.76336	6.74866	6.74643	6.75658	6.75282	0.991381	-0.0124882			0.251464	0.664048	0.00375907	0.634129	O75152	O75152;A0A1B0GUI2;E9PBY7;E9PQ61;A0A1B0GTU1	ZC11A_HUMAN	Zinc finger CCCH domain-containing protein 11A
6.34395	6.34126	6.34588	5.8954	5.93862	5.90423	6.3437	5.91275	0.370729	-1.43156	+	D:\CHENYUWAN\20240212-dia-lumos\ddab-enps-1h-dia-label-fee\Blank-NPs-DIA-Label-free_D:\CHENYUWAN\20240212-dia-lumos\ddab-enps-1h-dia-label-fee\ddab-enps-1h-DIA-Label-free	5.27311	0	0.430943	32.5186	O75153	O75153;K7EIG1;I3L2B0;I3L318	CLU_HUMAN	Clustered mitochondria protein homolog
6.10058	6.13277	6.09163	6.18737	6.15879	6.16301	6.10833	6.16972	1.15185	0.203954			1.79293	0.0159877	-0.0613961	-4.00158	O75165	O75165	DJC13_HUMAN	DnaJ homolog subfamily C member 13
6.1145	6.07033	6.0723	6.02279	6.03885	6.03759	6.08571	6.03308	0.885871	-0.174832			1.57994	0.0225775	0.0526298	3.43947	O75175	O75175;H7C148;H7C3F5	CNOT3_HUMAN	CCR4-NOT transcription complex subunit 3
5.90306	5.89759	5.91329	5.62431	5.59359	5.63262	5.90465	5.61684	0.51546	-0.956066	+	D:\CHENYUWAN\20240212-dia-lumos\ddab-enps-1h-dia-label-fee\Blank-NPs-DIA-Label-free_D:\CHENYUWAN\20240212-dia-lumos\ddab-enps-1h-dia-label-fee\ddab-enps-1h-DIA-Label-free	4.64443	0.000374332	0.287804	22.6066	O75179	O75179;H0YM23;H0YLQ3	ANR17_HUMAN	Ankyrin repeat domain-containing protein 17
5.81856	5.76596	5.86313	5.82727	5.81907	5.90676	5.81588	5.85103	1.0843	0.116765			0.371357	0.402145	-0.0351494	-0.88688	O75182	O75182	SIN3B_HUMAN	Paired amphipathic helix protein Sin3b
6.06976	6.03353	6.04937	5.5901	5.6677	5.60803	6.05089	5.62194	0.372442	-1.42491	+	D:\CHENYUWAN\20240212-dia-lumos\ddab-enps-1h-dia-label-fee\Blank-NPs-DIA-Label-free_D:\CHENYUWAN\20240212-dia-lumos\ddab-enps-1h-dia-label-fee\ddab-enps-1h-DIA-Label-free	4.12252	0.000398524	0.428941	16.6951	O75190	O75190;P25686;Q8NHS0;A0A0J9YX62;C9J2C4;C9JXB9;C9JRD2	DNJB6_HUMAN	DnaJ homolog subfamily B member 6
5.79028	5.79523	5.84299	5.88723	5.93454	5.93044	5.8095	5.9174	1.28205	0.358448	+	D:\CHENYUWAN\20240212-dia-lumos\ddab-enps-1h-dia-label-fee\Blank-NPs-DIA-Label-free_D:\CHENYUWAN\20240212-dia-lumos\ddab-enps-1h-dia-label-fee\ddab-enps-1h-DIA-Label-free	2.05397	0.0097011	-0.107904	-4.77135	O75208	O75208;H3BRC0;H3BNT2;H3BSJ5	COQ9_HUMAN	Ubiquinone biosynthesis protein COQ9, mitochondrial
5.50791	5.66649	5.70478	5.49083	NaN	NaN	5.62639	5.49083	0.731886	-0.450308			0	1	0.135557	0	O75223	O75223;M0QZK8	GGCT_HUMAN	Gamma-glutamylcyclotransferase
7.01741	7.01797	7.01086	7.0127	6.98212	7.02831	7.01541	7.00771	0.982428	-0.0255766			0.217858	0.731564	0.00769917	0.559707	O75251	O75251;F5GXJ1;F5H5N1	NDUS7_HUMAN	NADH dehydrogenase [ubiquinone] iron-sulfur protein 7, mitochondrial
7.23897	7.2069	7.23753	7.25305	7.26615	7.24967	7.2278	7.25629	1.06779	0.0946318			1.15462	0.0516113	-0.0284867	-2.4553	O75306	O75306	NDUS2_HUMAN	NADH dehydrogenase [ubiquinone] iron-sulfur protein 2, mitochondrial
5.75206	5.80496	5.79871	5.67999	5.60313	5.58538	5.78524	5.62283	0.688001	-0.539518	+	D:\CHENYUWAN\20240212-dia-lumos\ddab-enps-1h-dia-label-fee\Blank-NPs-DIA-Label-free_D:\CHENYUWAN\20240212-dia-lumos\ddab-enps-1h-dia-label-fee\ddab-enps-1h-DIA-Label-free	2.07878	0.00927513	0.162411	4.84973	O75312	O75312;H7C0E5;H7BZM7	ZPR1_HUMAN	Zinc finger protein ZPR1
4.41968	5.84546	5.82468	NaN	5.79329	5.78747	5.36327	5.79038	2.67367	1.41882			0.272708	0.614104	-0.427108	-0.701168	O75317	O75317;P62068;H7BZK6	UBP12_HUMAN	Ubiquitin carboxyl-terminal hydrolase 12
5.28452	5.26382	5.25326	5.28741	5.34359	5.36479	5.2672	5.33193	1.16073	0.215034			1.224	0.043964	-0.0647313	-2.60548	O75319	O75319;C9JYA6	DUS11_HUMAN	RNA/RNP complex-1-interacting phosphatase
7.18171	7.14677	7.1638	7.18252	7.18971	7.1741	7.16409	7.18211	1.04235	0.0598401			0.748632	0.133271	-0.0180133	-1.63022	O75323	O75323;H7C333	NIPS2_HUMAN	Protein NipSnap homolog 2
7.1763	7.15503	7.16146	7.01225	7.03552	7.01523	7.16426	7.021	0.71901	-0.475917	+	D:\CHENYUWAN\20240212-dia-lumos\ddab-enps-1h-dia-label-fee\Blank-NPs-DIA-Label-free_D:\CHENYUWAN\20240212-dia-lumos\ddab-enps-1h-dia-label-fee\ddab-enps-1h-DIA-Label-free	3.92115	0.000466877	0.143266	14.8446	O75340	O75340;A0A024QZ42	PDCD6_HUMAN	Programmed cell death protein 6
6.3843	6.39341	6.3815	6.02226	6.00244	6.04187	6.38641	6.02219	0.432299	-1.2099	+	D:\CHENYUWAN\20240212-dia-lumos\ddab-enps-1h-dia-label-fee\Blank-NPs-DIA-Label-free_D:\CHENYUWAN\20240212-dia-lumos\ddab-enps-1h-dia-label-fee\ddab-enps-1h-DIA-Label-free	5.16273	0	0.364216	30.5102	O75347	O75347;E5RJD8;E5RHG6;E5RIW3	TBCA_HUMAN	Tubulin-specific chaperone A
6.38498	6.4578	6.41295	6.29786	6.27939	6.27975	6.41858	6.28567	0.736363	-0.441512	+	D:\CHENYUWAN\20240212-dia-lumos\ddab-enps-1h-dia-label-fee\Blank-NPs-DIA-Label-free_D:\CHENYUWAN\20240212-dia-lumos\ddab-enps-1h-dia-label-fee\ddab-enps-1h-DIA-Label-free	2.41677	0.00558287	0.132908	6.02224	O75348	O75348	VATG1_HUMAN	V-type proton ATPase subunit G 1
6.45609	6.3908	6.41811	6.2337	6.20296	6.2732	6.42167	6.23662	0.653063	-0.614706	+	D:\CHENYUWAN\20240212-dia-lumos\ddab-enps-1h-dia-label-fee\Blank-NPs-DIA-Label-free_D:\CHENYUWAN\20240212-dia-lumos\ddab-enps-1h-dia-label-fee\ddab-enps-1h-DIA-Label-free	2.5786	0.00470746	0.185045	6.66103	O75351	O75351	VPS4B_HUMAN	Vacuolar protein sorting-associated protein 4B
7.38306	7.39898	7.34521	7.37667	7.39483	7.36068	7.37575	7.37739	1.00379	0.00545682			0.0294628	0.98174	-0.00164255	-0.087594	O75352	O75352;I3L295;I3L1D2;J3QW43;J3QRD5;J3KSI4;J3KTK8;J3KT75;I3L405;I3L261;J3QQZ4;I3L4E0;J3QS48	MPU1_HUMAN	Mannose-P-dolichol utilization defect 1 protein
5.32035	5.43776	5.20371	5.47328	5.41986	5.45229	5.3206	5.44848	1.34237	0.424778			0.857357	0.101828	-0.127871	-1.84444	O75362	O75362	ZN217_HUMAN	Zinc finger protein 217
7.9571	7.95775	7.95922	7.95903	7.95516	7.94703	7.95802	7.95374	0.990184	-0.0142311			0.524612	0.243218	0.00428375	1.19297	O75367	O75367	H2AY_HUMAN	Core histone macro-H2A.1
7.2901	7.28697	7.28722	7.21279	7.21112	7.2257	7.2881	7.21653	0.848082	-0.237725	+	D:\CHENYUWAN\20240212-dia-lumos\ddab-enps-1h-dia-label-fee\Blank-NPs-DIA-Label-free_D:\CHENYUWAN\20240212-dia-lumos\ddab-enps-1h-dia-label-fee\ddab-enps-1h-DIA-Label-free	3.95908	0.000479741	0.0715623	15.1772	O75369	O75369;E7EN95	FLNB_HUMAN	Filamin-B
6.31625	6.32669	6.32137	6.2977	6.27532	6.33327	6.32144	6.3021	0.956449	-0.0642406			0.491787	0.268725	0.0193383	1.12835	O75376	O75376;A0A088AWL3;E7EVK1	NCOR1_HUMAN	Nuclear receptor corepressor 1
6.3172	6.2983	6.30713	6.37136	6.35407	6.31166	6.30755	6.3457	1.09182	0.126734			0.962802	0.079803	-0.0381506	-2.05602	O75380	O75380	NDUS6_HUMAN	NADH dehydrogenase [ubiquinone] iron-sulfur protein 6, mitochondrial
6.71908	6.71501	6.71192	6.67526	6.69671	6.69075	6.71534	6.68757	0.938067	-0.0922378			1.83922	0.0147723	0.0277664	4.13116	O75381	O75381;K7EK59	PEX14_HUMAN	Peroxisomal membrane protein PEX14
7.81952	7.80477	7.8085	7.85341	7.84996	7.85147	7.81093	7.85161	1.09821	0.135155	+	D:\CHENYUWAN\20240212-dia-lumos\ddab-enps-1h-dia-label-fee\Blank-NPs-DIA-Label-free_D:\CHENYUWAN\20240212-dia-lumos\ddab-enps-1h-dia-label-fee\ddab-enps-1h-DIA-Label-free	3.06719	0.00230939	-0.0406858	-8.96471	O75390	O75390;B4DJV2;A0A0C4DGI3;H0YIC4	CISY_HUMAN	Citrate synthase, mitochondrial
NaN	5.81082	5.86064	5.87446	5.93671	5.88715	5.83573	5.89944	1.15801	0.211646			0.885837	0.0955182	-0.0637114	-2.07142	O75394	O75394	RM33_HUMAN	39S ribosomal protein L33, mitochondrial
7.16195	7.15679	7.16093	7.06444	7.07213	7.0542	7.15989	7.06359	0.801129	-0.319894	+	D:\CHENYUWAN\20240212-dia-lumos\ddab-enps-1h-dia-label-fee\Blank-NPs-DIA-Label-free_D:\CHENYUWAN\20240212-dia-lumos\ddab-enps-1h-dia-label-fee\ddab-enps-1h-DIA-Label-free	4.22697	0.000276134	0.0962974	17.7416	O75396	O75396	SC22B_HUMAN	Vesicle-trafficking protein SEC22b
6.91724	6.89217	6.90398	6.88345	6.87024	6.86658	6.90446	6.87342	0.931021	-0.103115			1.6033	0.0211839	0.0310402	3.49854	O75400	O75400;F5H578	PR40A_HUMAN	Pre-mRNA-processing factor 40 homolog A
6.38889	6.37134	6.40117	6.33063	6.3123	6.32691	6.38713	6.32328	0.863277	-0.212104	+	D:\CHENYUWAN\20240212-dia-lumos\ddab-enps-1h-dia-label-fee\Blank-NPs-DIA-Label-free_D:\CHENYUWAN\20240212-dia-lumos\ddab-enps-1h-dia-label-fee\ddab-enps-1h-DIA-Label-free	2.46205	0.00522034	0.0638496	6.19548	O75410	O75410;E5RJG6	TACC1_HUMAN	Transforming acidic coiled-coil-containing protein 1
6.69007	6.90593	6.81294	6.80401	6.80124	6.73111	6.80298	6.77879	0.945815	-0.0803696			0.133159	0.857438	0.0241934	0.361608	O75414	O75414;A0A0C4DG91;C9J9V6;C9JQB1	NDK6_HUMAN	Nucleoside diphosphate kinase 6
5.07077	5.3665	5.16782	5.28637	5.13646	5.34449	5.2017	5.25577	1.13261	0.179645			0.194252	0.770559	-0.0540786	-0.506164	O75427	O75427	LRCH4_HUMAN	Leucine-rich repeat and calponin homology domain-containing protein 4
6.49997	6.50843	6.51907	6.50645	6.50281	6.49054	6.50915	6.49993	0.978983	-0.0306437			0.558097	0.222434	0.00922473	1.25858	O75431	O75431;C9JNK6;C9JAZ1	MTX2_HUMAN	Metaxin-2
6.49804	6.42279	6.38589	6.28424	6.27933	6.29599	6.43557	6.28652	0.709494	-0.495138			1.9545	0.0116116	0.149051	4.46651	O75436	O75436	VP26A_HUMAN	Vacuolar protein sorting-associated protein 26A
6.85826	6.91062	6.83269	6.90414	6.8538	6.86562	6.86719	6.87452	1.01701	0.0243353			0.0951663	0.904885	-0.00732581	-0.266235	O75438	O75438	NDUB1_HUMAN	NADH dehydrogenase [ubiquinone] 1 beta subcomplex subunit 1
7.16174	7.1482	7.15025	7.15215	7.16089	7.17359	7.1534	7.16221	1.02051	0.029285			0.514381	0.250548	-0.00881529	-1.17287	O75439	O75439;G3V0E4;F8WBE1;F8WEA6;F8WAZ6	MPPB_HUMAN	Mitochondrial-processing peptidase subunit beta
6.24535	6.22818	6.27675	6.29043	6.26971	6.35205	6.25009	6.30406	1.13232	0.179288			0.881293	0.0966204	-0.0539705	-1.89208	O75446	O75446	SAP30_HUMAN	Histone deacetylase complex subunit SAP30
6.06566	6.07298	6.09955	6.09167	6.09644	6.14258	6.0794	6.11023	1.07358	0.102429			0.735312	0.137369	-0.0308344	-1.60416	O75448	O75448;B9TX62;F5GY88;A0A0B4J1W0	MED24_HUMAN	Mediator of RNA polymerase II transcription subunit 24
5.12518	5.15118	5.07554	5.1254	5.14341	5.16116	5.1173	5.14332	1.06176	0.0864521			0.459027	0.298497	-0.0260248	-1.06345	O75449	O75449	KTNA1_HUMAN	Katanin p60 ATPase-containing subunit A1
6.20351	6.28081	6.19214	NaN	NaN	5.93122	6.22549	5.93122	0.507843	-0.977545			0	1	0.29427	0	O75467	Q6AW86;O75467;Q96I98;M0R090;M0R1X9;M0R3B5;M0R0B1	Z324A_HUMAN	Zinc finger protein 324A
5.96976	NaN	5.93468	NaN	5.67724	5.62206	5.95222	5.64965	0.498233	-1.00511			1.94024	0.0121035	0.302567	9.25462	O75474	O75474	FRAT2_HUMAN	GSK-3-binding protein FRAT2
7.39915	7.39253	7.39118	7.42903	7.41521	7.41287	7.39429	7.41904	1.05864	0.0822144			1.93611	0.0122067	-0.024749	-4.41174	O75475	O75475	PSIP1_HUMAN	PC4 and SFRS1-interacting protein
7.09388	7.1049	7.10823	7.07293	7.0504	7.07215	7.10234	7.06516	0.917961	-0.123495			1.91243	0.0126361	0.0371757	4.34196	O75477	O75477	ERLN1_HUMAN	Erlin-1
5.56492	5.53607	5.5595	5.61981	5.584	5.60937	5.5535	5.6044	1.12435	0.169085			1.67316	0.0191021	-0.0508997	-3.6789	O75486	O75486;A0A1B0GTZ3;A0A0A0MR19	SUPT3_HUMAN	Transcription initiation protein SPT3 homolog
7.09687	7.08281	7.07495	7.09951	7.08874	7.08473	7.08488	7.09099	1.01418	0.0203147			0.322369	0.489543	-0.00611528	-0.785598	O75489	O75489	NDUS3_HUMAN	NADH dehydrogenase [ubiquinone] iron-sulfur protein 3, mitochondrial
7.22984	7.23977	7.23007	7.2191	7.21668	7.23156	7.23323	7.22245	0.975486	-0.0358071			0.888737	0.0947572	0.0107792	1.90694	O75494	O75494;R4GMP8;Q6IQ42;Q5JRI1	SRS10_HUMAN	Serine/arginine-rich splicing factor 10
6.07955	6.11022	6.10448	5.98406	6.0273	5.87727	6.09808	5.96288	0.732477	-0.449145			1.38441	0.0337217	0.135206	2.96702	O75506	O75506	HSBP1_HUMAN	Heat shock factor-binding protein 1
6.66667	6.64502	6.65675	6.66794	6.67493	6.66876	6.65615	6.67054	1.0337	0.0478203			1.01853	0.0707505	-0.0143949	-2.16988	O75521	O75521;A0A0C4DGA2	ECI2_HUMAN	Enoyl-CoA delta isomerase 2, mitochondrial
NaN	5.02849	NaN	NaN	NaN	4.78068	5.02849	4.78068	0.565188	-0.823197			0	1	0.247807	0	O75529	O75529	TAF5L_HUMAN	TAF5-like RNA polymerase II p300/CBP-associated factor-associated factor 65 kDa subunit 5L
6.17622	6.19351	6.19279	6.22103	6.23967	6.22129	6.18751	6.22733	1.09603	0.132284	+	D:\CHENYUWAN\20240212-dia-lumos\ddab-enps-1h-dia-label-fee\Blank-NPs-DIA-Label-free_D:\CHENYUWAN\20240212-dia-lumos\ddab-enps-1h-dia-label-fee\ddab-enps-1h-DIA-Label-free	2.05055	0.00971	-0.0398213	-4.76061	O75530	O75530	EED_HUMAN	Polycomb protein EED
7.64875	7.63628	7.64613	7.58074	7.59041	7.58465	7.64372	7.58527	0.874069	-0.194181	+	D:\CHENYUWAN\20240212-dia-lumos\ddab-enps-1h-dia-label-fee\Blank-NPs-DIA-Label-free_D:\CHENYUWAN\20240212-dia-lumos\ddab-enps-1h-dia-label-fee\ddab-enps-1h-DIA-Label-free	3.61194	0.00078866	0.0584542	12.384	O75531	O75531	BAF_HUMAN	Barrier-to-autointegration factor
7.56325	7.55889	7.55962	7.56558	7.56714	7.5618	7.56059	7.56484	1.00984	0.0141248			0.957095	0.0808315	-0.00425196	-2.04445	O75533	O75533	SF3B1_HUMAN	Splicing factor 3B subunit 1
6.99128	6.98234	6.98736	6.54214	6.5413	6.57723	6.987	6.55356	0.368605	-1.43985	+	D:\CHENYUWAN\20240212-dia-lumos\ddab-enps-1h-dia-label-fee\Blank-NPs-DIA-Label-free_D:\CHENYUWAN\20240212-dia-lumos\ddab-enps-1h-dia-label-fee\ddab-enps-1h-DIA-Label-free	5.43812	0	0.433439	35.7687	O75534	O75534;E9PLT0	CSDE1_HUMAN	Cold shock domain-containing protein E1
5.7587	5.53719	5.74747	5.83774	5.77001	5.82663	5.68112	5.81146	1.35004	0.432998			0.803165	0.115692	-0.130345	-1.73727	O75554	O75554	WBP4_HUMAN	WW domain-binding protein 4
6.23874	6.2531	6.24353	6.01003	5.93429	6.03416	6.24512	5.99283	0.559378	-0.838105	+	D:\CHENYUWAN\20240212-dia-lumos\ddab-enps-1h-dia-label-fee\Blank-NPs-DIA-Label-free_D:\CHENYUWAN\20240212-dia-lumos\ddab-enps-1h-dia-label-fee\ddab-enps-1h-DIA-Label-free	2.94005	0.00287784	0.252295	8.30494	O75569	O75569;G5E9Q4;F8WEG8;C9JMM3	PRKRA_HUMAN	Interferon-inducible double-stranded RNA-dependent protein kinase activator A
6.02034	6.04509	5.97145	6.09307	6.08616	6.09134	6.01229	6.09019	1.19646	0.258768			1.63667	0.0202956	-0.0778969	-3.584	O75581	O75581;F5H7J9;H0YGW5	LRP6_HUMAN	Low-density lipoprotein receptor-related protein 6
5.8055	5.78727	5.81034	5.8715	5.8815	5.79404	5.80104	5.84901	1.1168	0.159371			0.775283	0.124373	-0.0479754	-1.68246	O75586	O75586;G3V4A5;A0A087WYL7	MED6_HUMAN	Mediator of RNA polymerase II transcription subunit 6
5.77917	5.76945	5.7681	5.44891	5.53092	5.4029	5.77224	5.46091	0.488283	-1.03421	+	D:\CHENYUWAN\20240212-dia-lumos\ddab-enps-1h-dia-label-fee\Blank-NPs-DIA-Label-free_D:\CHENYUWAN\20240212-dia-lumos\ddab-enps-1h-dia-label-fee\ddab-enps-1h-DIA-Label-free	2.935	0.00286818	0.311329	8.27967	O75592	O75592	MYCB2_HUMAN	E3 ubiquitin-protein ligase MYCBP2
6.36636	6.33042	6.3575	6.4904	6.4636	6.48866	6.35143	6.48089	1.34729	0.430066	+	D:\CHENYUWAN\20240212-dia-lumos\ddab-enps-1h-dia-label-fee\Blank-NPs-DIA-Label-free_D:\CHENYUWAN\20240212-dia-lumos\ddab-enps-1h-dia-label-fee\ddab-enps-1h-DIA-Label-free	3.13686	0.00215058	-0.129462	-9.34638	O75600	O75600	KBL_HUMAN	2-amino-3-ketobutyrate coenzyme A ligase, mitochondrial
6.73182	6.72298	6.73117	6.80368	6.79444	6.79834	6.72866	6.79882	1.17533	0.233065	+	D:\CHENYUWAN\20240212-dia-lumos\ddab-enps-1h-dia-label-fee\Blank-NPs-DIA-Label-free_D:\CHENYUWAN\20240212-dia-lumos\ddab-enps-1h-dia-label-fee\ddab-enps-1h-DIA-Label-free	4.24834	0.00028169	-0.0701593	-17.9636	O75607	O75607	NPM3_HUMAN	Nucleoplasmin-3
6.80377	6.82451	6.82074	6.74373	6.74962	6.73916	6.81634	6.74417	0.846883	-0.239766	+	D:\CHENYUWAN\20240212-dia-lumos\ddab-enps-1h-dia-label-fee\Blank-NPs-DIA-Label-free_D:\CHENYUWAN\20240212-dia-lumos\ddab-enps-1h-dia-label-fee\ddab-enps-1h-DIA-Label-free	3.28695	0.00202746	0.0721765	10.2205	O75608	O75608;B4DP64;E5RGR0;A0A087X1K9	LYPA1_HUMAN	Acyl-protein thioesterase 1
6.72493	6.72464	6.72477	6.75011	6.73928	6.74275	6.72478	6.74405	1.04537	0.0640158	+	D:\CHENYUWAN\20240212-dia-lumos\ddab-enps-1h-dia-label-fee\Blank-NPs-DIA-Label-free_D:\CHENYUWAN\20240212-dia-lumos\ddab-enps-1h-dia-label-fee\ddab-enps-1h-DIA-Label-free	2.42099	0.00552544	-0.0192706	-6.03821	O75616	O75616;J3QSB2;J3QRV9	ERAL1_HUMAN	GTPase Era, mitochondrial
6.81546	6.81407	6.86203	6.73787	6.77687	6.79951	6.83052	6.77142	0.872754	-0.196353			1.16171	0.050438	0.0591079	2.47049	O75629	O75629	CREG1_HUMAN	Protein CREG1
7.22331	7.22237	7.21741	7.22112	7.2256	7.2245	7.22103	7.22374	1.00625	0.00899135			0.522857	0.244374	-0.00270653	-1.18952	O75643	O75643	U520_HUMAN	U5 small nuclear ribonucleoprotein 200 kDa helicase
5.71376	5.62231	5.55343	5.74692	5.68552	5.80429	5.62984	5.74558	1.3054	0.384488			0.937581	0.0837654	-0.115742	-2.00499	O75648	O75648	MTU1_HUMAN	Mitochondrial tRNA-specific 2-thiouridylase 1
5.96971	5.97731	5.98574	5.7929	5.75724	NaN	5.97759	5.77507	0.627308	-0.672755	+	D:\CHENYUWAN\20240212-dia-lumos\ddab-enps-1h-dia-label-fee\Blank-NPs-DIA-Label-free_D:\CHENYUWAN\20240212-dia-lumos\ddab-enps-1h-dia-label-fee\ddab-enps-1h-DIA-Label-free	3.09347	0.00222347	0.202519	13.8986	O75674	O75674;J3KQU4;I3L367;I3L4N3;I3L1Q1;I3L4I4;I3NI44;I3L3T4;I3L4G0	TM1L1_HUMAN	TOM1-like protein 1
NaN	5.49539	NaN	5.69741	5.72721	5.731	5.49539	5.71854	1.67168	0.741297			0	1	-0.223152	0	O75676	O75676;A0A0A6YYC0;E9PJN1	KS6A4_HUMAN	Ribosomal protein S6 kinase alpha-4
6.3933	6.40087	6.39751	6.42503	6.41226	6.4165	6.39723	6.41793	1.04883	0.0687861	+	D:\CHENYUWAN\20240212-dia-lumos\ddab-enps-1h-dia-label-fee\Blank-NPs-DIA-Label-free_D:\CHENYUWAN\20240212-dia-lumos\ddab-enps-1h-dia-label-fee\ddab-enps-1h-DIA-Label-free	2.05149	0.00967684	-0.0207067	-4.76355	O75683	O75683	SURF6_HUMAN	Surfeit locus protein 6
6.65913	6.66412	6.65883	6.67084	6.67209	6.67088	6.66069	6.67127	1.02466	0.0351482	+	D:\CHENYUWAN\20240212-dia-lumos\ddab-enps-1h-dia-label-fee\Blank-NPs-DIA-Label-free_D:\CHENYUWAN\20240212-dia-lumos\ddab-enps-1h-dia-label-fee\ddab-enps-1h-DIA-Label-free	2.40959	0.00572506	-0.0105809	-5.99512	O75691	O75691	UTP20_HUMAN	Small subunit processome component 20 homolog
7.11969	7.1238	7.13042	7.10088	7.09556	7.09133	7.12464	7.09592	0.936023	-0.0953847	+	D:\CHENYUWAN\20240212-dia-lumos\ddab-enps-1h-dia-label-fee\Blank-NPs-DIA-Label-free_D:\CHENYUWAN\20240212-dia-lumos\ddab-enps-1h-dia-label-fee\ddab-enps-1h-DIA-Label-free	2.63137	0.00408858	0.0287139	6.88148	O75694	O75694;E9PF10	NU155_HUMAN	Nuclear pore complex protein Nup155
6.26292	6.25528	6.26914	6.25252	6.20512	6.2653	6.26245	6.24098	0.951769	-0.0713174			0.500621	0.260886	0.0214688	1.14578	O75695	O75695	XRP2_HUMAN	Protein XRP2
6.24488	6.20057	6.1926	6.44936	6.44088	6.42913	6.21269	6.43979	1.68695	0.75442	+	D:\CHENYUWAN\20240212-dia-lumos\ddab-enps-1h-dia-label-fee\Blank-NPs-DIA-Label-free_D:\CHENYUWAN\20240212-dia-lumos\ddab-enps-1h-dia-label-fee\ddab-enps-1h-DIA-Label-free	3.71253	0.000565934	-0.227103	-13.1378	O75717	O75717	WDHD1_HUMAN	WD repeat and HMG-box DNA-binding protein 1
7.0145	7.01655	7.00488	6.88096	6.89265	6.91031	7.01198	6.89464	0.763246	-0.38978	+	D:\CHENYUWAN\20240212-dia-lumos\ddab-enps-1h-dia-label-fee\Blank-NPs-DIA-Label-free_D:\CHENYUWAN\20240212-dia-lumos\ddab-enps-1h-dia-label-fee\ddab-enps-1h-DIA-Label-free	3.65086	0.000806324	0.117335	12.6706	O75718	O75718;C9JP16	CRTAP_HUMAN	Cartilage-associated protein
7.01094	7.01152	7.02089	7.03548	7.0235	7.01713	7.01445	7.02537	1.02547	0.0362799			0.805424	0.115209	-0.0109212	-1.74172	O75746	O75746;B4DGK6;H0YFB2;F8W9J0	CMC1_HUMAN	Calcium-binding mitochondrial carrier protein Aralar1
5.51628	NaN	5.61421	5.60763	5.58156	NaN	5.56524	5.5946	1.06993	0.0975119			0.206961	0.751412	-0.0293539	-0.579332	O75751	O75751	S22A3_HUMAN	Solute carrier family 22 member 3
5.92148	5.92904	5.83364	5.86343	5.92643	5.90644	5.89472	5.89877	1.00935	0.0134317			0.0383148	0.971282	-0.00404342	-0.11289	O75781	O75781;A0A087WTK8;A0A087WWY4	PALM_HUMAN	Paralemmin-1
6.30569	6.30422	6.2467	6.17745	6.14308	6.17138	6.28553	6.16397	0.755854	-0.403821	+	D:\CHENYUWAN\20240212-dia-lumos\ddab-enps-1h-dia-label-fee\Blank-NPs-DIA-Label-free_D:\CHENYUWAN\20240212-dia-lumos\ddab-enps-1h-dia-label-fee\ddab-enps-1h-DIA-Label-free	2.27191	0.00662155	0.121562	5.49469	O75787	O75787;B7Z1I9;B7Z413;A0A1B0GU12;A0A1B0GWJ8;H7C3E1;A0A1B0GVI9;A0A1B0GVB9;A0A1B0GUT7;A0A1B0GWD6;A0A1B0GVW0;A0A1B0GVC7;A0A1B0GTB0;A0A1B0GTU8;A0A1C7CYW4	RENR_HUMAN	Renin receptor
6.81681	6.79708	6.84133	6.73295	6.84433	6.92674	6.81841	6.83467	1.03816	0.0540312			0.101477	0.896774	-0.0162649	-0.282422	O75792	O75792	RNH2A_HUMAN	Ribonuclease H2 subunit A
5.65515	5.75872	5.76092	NaN	NaN	5.32192	5.72493	5.32192	0.395359	-1.33876			0	1	0.403008	0	O75794	O75794;X6RA30;H7BZW7;X6RF82	CD123_HUMAN	Cell division cycle protein 123 homolog
6.21739	6.23948	6.24399	6.30919	6.25927	6.32211	6.23362	6.29686	1.15674	0.210069			1.41285	0.0322191	-0.0632366	-3.03343	O75817	O75817;C9JYM0	POP7_HUMAN	Ribonuclease P protein subunit p20
6.1719	6.1832	6.19597	6.28074	6.27711	6.34335	6.18369	6.3004	1.30832	0.387717	+	D:\CHENYUWAN\20240212-dia-lumos\ddab-enps-1h-dia-label-fee\Blank-NPs-DIA-Label-free_D:\CHENYUWAN\20240212-dia-lumos\ddab-enps-1h-dia-label-fee\ddab-enps-1h-DIA-Label-free	2.17551	0.00794641	-0.116714	-5.16485	O75818	O75818;A0A087X1N3;F8WC38	RPP40_HUMAN	Ribonuclease P protein subunit p40
7.05264	7.05687	7.0746	6.82251	6.81339	6.82429	7.06137	6.82006	0.573709	-0.801609	+	D:\CHENYUWAN\20240212-dia-lumos\ddab-enps-1h-dia-label-fee\Blank-NPs-DIA-Label-free_D:\CHENYUWAN\20240212-dia-lumos\ddab-enps-1h-dia-label-fee\ddab-enps-1h-DIA-Label-free	5.24845	0	0.241308	32.0587	O75821	O75821;K7ENA8;K7ER90;K7EL20;K7EP16	EIF3G_HUMAN	Eukaryotic translation initiation factor 3 subunit G
6.25161	6.28864	6.23933	5.93484	6.0408	6.04185	6.25986	6.00583	0.557146	-0.843873	+	D:\CHENYUWAN\20240212-dia-lumos\ddab-enps-1h-dia-label-fee\Blank-NPs-DIA-Label-free_D:\CHENYUWAN\20240212-dia-lumos\ddab-enps-1h-dia-label-fee\ddab-enps-1h-DIA-Label-free	2.56465	0.004904	0.254031	6.60374	O75822	O75822	EIF3J_HUMAN	Eukaryotic translation initiation factor 3 subunit J
7.1391	7.1396	7.14148	7.10112	7.08424	7.07797	7.14006	7.08778	0.886579	-0.173679	+	D:\CHENYUWAN\20240212-dia-lumos\ddab-enps-1h-dia-label-fee\Blank-NPs-DIA-Label-free_D:\CHENYUWAN\20240212-dia-lumos\ddab-enps-1h-dia-label-fee\ddab-enps-1h-DIA-Label-free	2.77621	0.00361644	0.0522828	7.51979	O75844	O75844	FACE1_HUMAN	CAAX prenyl protease 1 homolog
5.91871	5.97736	6.04226	NaN	5.96538	5.92651	5.97944	5.94594	0.925764	-0.111283			0.269454	0.621188	0.0334998	0.693791	O75845	O75845	SC5D_HUMAN	Lathosterol oxidase
6.80323	6.77669	6.79583	6.88207	6.87944	6.84766	6.79192	6.86972	1.19621	0.258473	+	D:\CHENYUWAN\20240212-dia-lumos\ddab-enps-1h-dia-label-fee\Blank-NPs-DIA-Label-free_D:\CHENYUWAN\20240212-dia-lumos\ddab-enps-1h-dia-label-fee\ddab-enps-1h-DIA-Label-free	2.33619	0.00635267	-0.0778076	-5.72389	O75874	O75874	IDHC_HUMAN	Isocitrate dehydrogenase [NADP] cytoplasmic
5.96109	5.9492	5.946	6.05087	6.00903	6.02737	5.9521	6.02909	1.19397	0.255769	+	D:\CHENYUWAN\20240212-dia-lumos\ddab-enps-1h-dia-label-fee\Blank-NPs-DIA-Label-free_D:\CHENYUWAN\20240212-dia-lumos\ddab-enps-1h-dia-label-fee\ddab-enps-1h-DIA-Label-free	2.39636	0.00580591	-0.0769943	-5.94545	O75879	O75879;D6REA0	GATB_HUMAN	Glutamyl-tRNA(Gln) amidotransferase subunit B, mitochondrial
7.1332	7.10543	7.12891	7.15297	7.15166	7.16788	7.12251	7.1575	1.08389	0.116224			1.59294	0.0217815	-0.034987	-3.47228	O75880	O75880;J3QL56	SCO1_HUMAN	Protein SCO1 homolog, mitochondrial
5.28331	5.48078	5.37626	5.40902	5.31581	5.43094	5.38012	5.38526	1.01191	0.0170825			0.0256859	0.984671	-0.00514237	-0.0766655	O75882	O75882	ATRN_HUMAN	Attractin
6.34235	6.34507	6.28892	6.3365	6.33094	6.32952	6.32545	6.33232	1.01595	0.0228294			0.138003	0.85239	-0.00687234	-0.373433	O75907	O75907;A0A0A0MR74	DGAT1_HUMAN	Diacylglycerol O-acyltransferase 1
6.75028	6.69375	6.69967	6.79782	6.77379	6.74294	6.71457	6.77152	1.14012	0.189183			1.11775	0.0562097	-0.0569493	-2.37683	O75909	O75909;G3V5E1;G3V2Q3;G3V235	CCNK_HUMAN	Cyclin-K
6.36611	6.3536	6.35797	6.30755	6.28321	6.33457	6.35923	6.30844	0.889637	-0.168711			1.53346	0.0244557	0.050787	3.32369	O75911	O75911;Q5SUY4	DHRS3_HUMAN	Short-chain dehydrogenase/reductase 3
7.35559	7.34282	7.33084	7.35567	7.34968	7.32531	7.34308	7.34355	1.00108	0.00155134			0.0131851	0.997944	-0.0004673	-0.0398848	O75915	O75915	PRAF3_HUMAN	PRA1 family protein 3
5.24851	NaN	5.33385	5.57113	5.4737	5.48987	5.29118	5.51157	1.66107	0.732115			1.65835	0.0193517	-0.220388	-4.38513	O75923	O75923	DYSF_HUMAN	Dysferlin
5.79465	5.82352	5.8103	5.80053	5.7991	5.62458	5.80949	5.7414	0.854898	-0.226176			0.50476	0.257837	0.0680858	1.15393	O75925	O75925	PIAS1_HUMAN	E3 SUMO-protein ligase PIAS1
5.6057	5.68731	5.66038	5.75064	5.75622	5.76775	5.65113	5.7582	1.2796	0.355694			1.92022	0.0124651	-0.107075	-4.36484	O75928	O75928;Q9Y6X2;A0A087WUY7;E7ESB4;E9PHH8;K7EMP6;A0A0A0MS92;K7EJT4;K7EQX5;U3KQV1;K7ER97	PIAS2_HUMAN	E3 SUMO-protein ligase PIAS2
6.6404	6.64278	6.64904	6.60687	6.63554	6.63914	6.64407	6.62719	0.961863	-0.0560974			0.735019	0.13745	0.016887	1.60359	O75934	O75934	SPF27_HUMAN	Pre-mRNA-splicing factor SPF27
5.89413	5.96255	NaN	NaN	5.58585	NaN	5.92834	5.58585	0.454475	-1.13773			0	1	0.34249	0	O75935	O75935;X6RLR1;A0A0A0MRV8;X6RA56;X6RCK5	DCTN3_HUMAN	Dynactin subunit 3
6.20942	6.1746	6.14091	6.34042	6.38383	6.32912	6.17498	6.35112	1.50019	0.585147	+	D:\CHENYUWAN\20240212-dia-lumos\ddab-enps-1h-dia-label-fee\Blank-NPs-DIA-Label-free_D:\CHENYUWAN\20240212-dia-lumos\ddab-enps-1h-dia-label-fee\ddab-enps-1h-DIA-Label-free	2.6141	0.00427473	-0.176147	-6.80863	O75937	O75937;S4R3J5	DNJC8_HUMAN	DnaJ homolog subfamily C member 8
6.35468	6.36052	6.39018	6.48198	6.4767	6.46912	6.36846	6.47593	1.28077	0.357015	+	D:\CHENYUWAN\20240212-dia-lumos\ddab-enps-1h-dia-label-fee\Blank-NPs-DIA-Label-free_D:\CHENYUWAN\20240212-dia-lumos\ddab-enps-1h-dia-label-fee\ddab-enps-1h-DIA-Label-free	3.12118	0.0021219	-0.107473	-9.25919	O75940	O75940	SPF30_HUMAN	Survival of motor neuron-related-splicing factor 30
NaN	5.2512	5.34316	5.38716	5.3349	NaN	5.29718	5.36103	1.15838	0.212103			0.455023	0.301987	-0.0638492	-1.20727	O75943	O75943;A0A0G2JPT5;H0Y9J8;A0A0G2JNH5;A0A0G2JP78	RAD17_HUMAN	Cell cycle checkpoint protein RAD17
7.41969	7.39964	7.41721	7.41303	7.404	7.40449	7.41218	7.40718	0.988539	-0.0166307			0.291039	0.565506	0.00500615	0.719487	O75947	O75947	ATP5H_HUMAN	ATP synthase subunit d, mitochondrial
7.14025	7.1469	7.1422	7.16737	7.15821	7.15806	7.14312	7.16121	1.04255	0.0601214	+	D:\CHENYUWAN\20240212-dia-lumos\ddab-enps-1h-dia-label-fee\Blank-NPs-DIA-Label-free_D:\CHENYUWAN\20240212-dia-lumos\ddab-enps-1h-dia-label-fee\ddab-enps-1h-DIA-Label-free	2.10963	0.00888636	-0.0180982	-4.94857	O75955	O75955;A0A140T9R1;A0A140T974;A0A140T9W4	FLOT1_HUMAN	Flotillin-1
5.44649	5.50308	5.41016	5.21855	5.18724	5.30769	5.45325	5.23783	0.608947	-0.715611	+	D:\CHENYUWAN\20240212-dia-lumos\ddab-enps-1h-dia-label-fee\Blank-NPs-DIA-Label-free_D:\CHENYUWAN\20240212-dia-lumos\ddab-enps-1h-dia-label-fee\ddab-enps-1h-DIA-Label-free	2.05606	0.00965344	0.21542	4.7779	O75962	O75962;E7EPJ7;E7EWP2;A0A087X139	TRIO_HUMAN	Triple functional domain protein
7.74699	7.7446	7.75837	7.77908	7.79462	7.79698	7.74999	7.79023	1.09708	0.133672	+	D:\CHENYUWAN\20240212-dia-lumos\ddab-enps-1h-dia-label-fee\Blank-NPs-DIA-Label-free_D:\CHENYUWAN\20240212-dia-lumos\ddab-enps-1h-dia-label-fee\ddab-enps-1h-DIA-Label-free	2.33396	0.00634152	-0.0402395	-5.71581	O75964	O75964;E9PN17	ATP5L_HUMAN	ATP synthase subunit g, mitochondrial
NaN	NaN	5.64585	5.76058	5.7675	5.97165	5.64585	5.83324	1.53956	0.622517			0	1	-0.187396	0	O75970	O75970;F5H1U9;H0YGQ3	MPDZ_HUMAN	Multiple PDZ domain protein
6.41183	6.40038	6.40581	6.41787	6.42503	6.41008	6.40601	6.41766	1.02719	0.038706			1.00575	0.0728695	-0.0116518	-2.14363	O75976	O75976	CBPD_HUMAN	Carboxypeptidase D
6.31111	6.33301	6.32523	6.37323	6.35538	6.31487	6.32312	6.34783	1.05855	0.082086			0.600644	0.19785	-0.0247103	-1.34164	O76003	O76003	GLRX3_HUMAN	Glutaredoxin-3
7.80476	7.78991	7.7944	7.8029	7.79848	7.81113	7.79636	7.80417	1.01815	0.0259476			0.609212	0.193171	-0.00781091	-1.35834	O76021	O76021;J3QSV6;I3L3C4	RL1D1_HUMAN	Ribosomal L1 domain-containing protein 1
6.50749	6.49708	6.50184	6.45058	6.44691	6.44986	6.50214	6.44912	0.885073	-0.176132	+	D:\CHENYUWAN\20240212-dia-lumos\ddab-enps-1h-dia-label-fee\Blank-NPs-DIA-Label-free_D:\CHENYUWAN\20240212-dia-lumos\ddab-enps-1h-dia-label-fee\ddab-enps-1h-DIA-Label-free	4.10305	0.000391304	0.053021	16.5067	O76024	O76024	WFS1_HUMAN	Wolframin
6.89843	6.9096	6.90431	6.89834	6.88563	6.88838	6.90411	6.89078	0.969771	-0.0442846			1.24347	0.0429484	0.0133313	2.64825	O76031	O76031;H0YM48	CLPX_HUMAN	ATP-dependent Clp protease ATP-binding subunit clpX-like, mitochondrial
4.81852	4.60582	4.91255	5.2818	5.33595	5.18673	4.77896	5.26816	3.08458	1.62507	+	D:\CHENYUWAN\20240212-dia-lumos\ddab-enps-1h-dia-label-fee\Blank-NPs-DIA-Label-free_D:\CHENYUWAN\20240212-dia-lumos\ddab-enps-1h-dia-label-fee\ddab-enps-1h-DIA-Label-free	2.0819	0.00923499	-0.489196	-4.85966	O76061	O76061;H0YB13	STC2_HUMAN	Stanniocalcin-2
5.91985	5.91516	5.97663	5.82102	5.83591	5.75735	5.93721	5.80476	0.737138	-0.439994			1.88123	0.0133925	0.132452	4.25122	O76071	O76071	CIAO1_HUMAN	Probable cytosolic iron-sulfur protein assembly protein CIAO1
5.51614	5.49827	5.49486	5.40484	NaN	NaN	5.50309	5.40484	0.797528	-0.326393			0	1	0.0982536	0	O76076	O76076	WISP2_HUMAN	WNT1-inducible-signaling pathway protein 2
5.85326	5.80549	5.75835	5.90333	5.82208	5.80536	5.8057	5.84359	1.09116	0.125863			0.391668	0.375266	-0.0378888	-0.928253	O76082	O76082	S22A5_HUMAN	Solute carrier family 22 member 5
6.56008	6.54768	6.55497	6.26361	6.30329	6.27934	6.55424	6.28208	0.534368	-0.904094	+	D:\CHENYUWAN\20240212-dia-lumos\ddab-enps-1h-dia-label-fee\Blank-NPs-DIA-Label-free_D:\CHENYUWAN\20240212-dia-lumos\ddab-enps-1h-dia-label-fee\ddab-enps-1h-DIA-Label-free	4.63813	0.000371353	0.272159	22.5241	O76094	O76094;R4GNC1	SRP72_HUMAN	Signal recognition particle subunit SRP72
5.27381	5.4734	5.29307	5.45354	5.36365	5.41662	5.34676	5.41127	1.16015	0.214312			0.396959	0.367114	-0.0645145	-0.938977	O76095	O76095	JTB_HUMAN	Protein JTB
6.86203	6.92103	6.74638	6.82557	6.86343	6.82685	6.84315	6.83862	0.989624	-0.0150483			0.0288557	0.982073	0.00453027	0.0858427	O94762	O94762;J3KTQ2	RECQ5_HUMAN	ATP-dependent DNA helicase Q5
5.98944	6.1249	6.12291	6.12675	6.11088	6.09203	6.07908	6.10989	1.0735	0.102324			0.268237	0.623766	-0.0308029	-0.670582	O94766	O94766;G3V150;E9PNA1	B3GA3_HUMAN	Galactosylgalactosylxylosylprotein 3-beta-glucuronosyltransferase 3
7.23692	7.23249	7.233	7.22141	7.23928	7.24296	7.23414	7.23455	1.00094	0.00135424			0.0199573	0.990788	-0.000407537	-0.0599295	O94776	O94776	MTA2_HUMAN	Metastasis-associated protein MTA2
5.16533	5.17245	5.06238	5.12708	5.12442	5.34726	5.13339	5.19959	1.16466	0.219909			0.332967	0.466653	-0.0661988	-0.807709	O94806	Q9BZL6;Q15139;O94806;B4DTS2;F8WBA3;M0R2Z8	KPCD3_HUMAN	Serine/threonine-protein kinase D3
5.41383	5.40434	5.38825	NaN	4.98868	NaN	5.40214	4.98868	0.385963	-1.37347			0	1	0.413455	0	O94822	O94822;H7BYG8	LTN1_HUMAN	E3 ubiquitin-protein ligase listerin
7.22203	7.23	7.21212	7.20783	7.2046	7.21454	7.22138	7.20899	0.971864	-0.0411731			0.977346	0.0778877	0.0123943	2.08559	O94826	O94826	TOM70_HUMAN	Mitochondrial import receptor subunit TOM70
6.47542	6.51248	6.4912	6.47431	6.47891	6.48319	6.49303	6.4788	0.96776	-0.0472788			0.57377	0.212373	0.0142322	1.2892	O94842	O94842	TOX4_HUMAN	TOX high mobility group box family member 4
6.26609	6.26912	6.19477	5.78984	NaN	NaN	6.24333	5.78984	0.351978	-1.50644			0	1	0.453485	0	O94855	O94855;E9PDM8	SC24D_HUMAN	Protein transport protein Sec24D
NaN	5.5709	NaN	5.63198	NaN	5.66778	5.5709	5.64988	1.19946	0.262381			0	1	-0.078985	0	O94864	O94864	ST65G_HUMAN	STAGA complex 65 subunit gamma
6.49526	6.4821	6.48845	6.45069	6.4362	6.42132	6.4886	6.43607	0.886067	-0.174512	+	D:\CHENYUWAN\20240212-dia-lumos\ddab-enps-1h-dia-label-fee\Blank-NPs-DIA-Label-free_D:\CHENYUWAN\20240212-dia-lumos\ddab-enps-1h-dia-label-fee\ddab-enps-1h-DIA-Label-free	2.31676	0.00633892	0.0525333	5.65378	O94874	O94874;Q92845	UFL1_HUMAN	E3 UFM1-protein ligase 1
6.20505	6.21235	6.221	6.15203	6.20028	6.16861	6.2128	6.17364	0.91378	-0.130081			1.23539	0.0435181	0.0391582	2.63046	O94875	O94875;H7BXR3;H7C1R7	SRBS2_HUMAN	Sorbin and SH3 domain-containing protein 2
5.3729	5.25853	5.21099	4.9539	5.0705	NaN	5.2808	5.0122	0.53876	-0.892285			1.4181	0.0319165	0.268605	3.54652	O94876	O94876;Q6N039;E9PC87;D6RH19	TMCC1_HUMAN	Transmembrane and coiled-coil domains protein 1
6.37662	6.38607	6.3902	6.38366	6.37519	6.328	6.3843	6.36228	0.950568	-0.0731389			0.547967	0.228381	0.0220168	1.23876	O94880	O94880;A0A0U1RRH6	PHF14_HUMAN	PHD finger protein 14
5.92857	5.93733	5.92332	5.95128	5.89337	5.93851	5.92974	5.92772	0.99535	-0.00672358			0.0380782	0.97147	0.00202401	0.11222	O94886	O94886	CSCL1_HUMAN	CSC1-like protein 1
NaN	5.52853	5.47656	5.59499	5.60632	5.49934	5.50254	5.56688	1.15969	0.213743			0.565865	0.217079	-0.064343	-1.34338	O94887	O94887	FARP2_HUMAN	FERM, RhoGEF and pleckstrin domain-containing protein 2
6.47026	6.37192	6.43553	6.62347	6.60008	6.57402	6.4259	6.59919	1.49035	0.575648	+	D:\CHENYUWAN\20240212-dia-lumos\ddab-enps-1h-dia-label-fee\Blank-NPs-DIA-Label-free_D:\CHENYUWAN\20240212-dia-lumos\ddab-enps-1h-dia-label-fee\ddab-enps-1h-DIA-Label-free	2.24223	0.00691454	-0.173288	-5.39139	O94888	O94888;C9JAT7	UBXN7_HUMAN	UBX domain-containing protein 7
6.6273	6.62067	6.61806	6.59082	6.59082	6.58598	6.62201	6.58921	0.927247	-0.108974	+	D:\CHENYUWAN\20240212-dia-lumos\ddab-enps-1h-dia-label-fee\Blank-NPs-DIA-Label-free_D:\CHENYUWAN\20240212-dia-lumos\ddab-enps-1h-dia-label-fee\ddab-enps-1h-DIA-Label-free	3.29813	0.00195329	0.0328042	10.2885	O94901	O94901;H0Y6N5;E9PHI4;H0Y742	SUN1_HUMAN	SUN domain-containing protein 1
6.70134	6.70135	6.69902	6.65119	6.66203	6.68748	6.70057	6.6669	0.925397	-0.111856			1.45075	0.0296726	0.033672	3.1231	O94905	O94905;E5RHW4;E5RJ09	ERLN2_HUMAN	Erlin-2
7.15389	7.1554	7.15552	7.1354	7.14492	7.142	7.15494	7.14077	0.967903	-0.0470651	+	D:\CHENYUWAN\20240212-dia-lumos\ddab-enps-1h-dia-label-fee\Blank-NPs-DIA-Label-free_D:\CHENYUWAN\20240212-dia-lumos\ddab-enps-1h-dia-label-fee\ddab-enps-1h-DIA-Label-free	2.10889	0.00888178	0.0141679	4.94618	O94906	O94906	PRP6_HUMAN	Pre-mRNA-processing factor 6
6.13177	6.1658	6.17177	6.13287	6.10612	6.13369	6.15645	6.12423	0.928497	-0.107031			0.980532	0.0774644	0.0322196	2.09208	O94913	O94913	PCF11_HUMAN	Pre-mRNA cleavage complex 2 protein Pcf11
5.81843	5.85158	5.84544	5.63863	5.58653	5.60122	5.83848	5.60879	0.589268	-0.763004	+	D:\CHENYUWAN\20240212-dia-lumos\ddab-enps-1h-dia-label-fee\Blank-NPs-DIA-Label-free_D:\CHENYUWAN\20240212-dia-lumos\ddab-enps-1h-dia-label-fee\ddab-enps-1h-DIA-Label-free	3.61147	0.000787645	0.229687	12.3806	O94915	Q5TBA9;O94915;D6RJI4;A0A0C4DFX2;F2Z2S2	FRYL_HUMAN	Protein furry homolog-like
5.58127	5.62176	5.54968	5.29676	5.2055	5.31306	5.58423	5.27177	0.487011	-1.03797	+	D:\CHENYUWAN\20240212-dia-lumos\ddab-enps-1h-dia-label-fee\Blank-NPs-DIA-Label-free_D:\CHENYUWAN\20240212-dia-lumos\ddab-enps-1h-dia-label-fee\ddab-enps-1h-DIA-Label-free	2.86225	0.00312077	0.312461	7.92337	O94916	O94916;J3KRL6	NFAT5_HUMAN	Nuclear factor of activated T-cells 5
7.09588	7.10133	7.10434	7.10669	7.11355	7.12847	7.10052	7.11623	1.03685	0.0522141			1.07238	0.0632569	-0.0157183	-2.28148	O94925	O94925;H7BZD1	GLSK_HUMAN	Glutaminase kidney isoform, mitochondrial
NaN	5.39701	5.437	4.85633	5.47594	5.56926	5.417	5.30051	0.764723	-0.38699			0.146258	0.840479	0.116495	0.402815	O94953	O94953;F5GX28;A0A0C4DFL8;K7ES23	KDM4B_HUMAN	Lysine-specific demethylase 4B
5.66512	5.70126	5.64268	5.60713	5.51321	5.60703	5.66968	5.57579	0.805573	-0.311912			1.23727	0.0433606	0.093895	2.6346	O94966	O94966;E7ESU0;B5MEG5;E7EST9	UBP19_HUMAN	Ubiquitin carboxyl-terminal hydrolase 19
6.8029	6.8079	6.80756	6.82534	6.8205	6.82667	6.80612	6.82417	1.04243	0.0599564	+	D:\CHENYUWAN\20240212-dia-lumos\ddab-enps-1h-dia-label-fee\Blank-NPs-DIA-Label-free_D:\CHENYUWAN\20240212-dia-lumos\ddab-enps-1h-dia-label-fee\ddab-enps-1h-DIA-Label-free	2.7264	0.00378745	-0.0180484	-7.29459	O94973	O94973;A0A0G2JS82	AP2A2_HUMAN	AP-2 complex subunit alpha-2
6.42675	6.42459	6.44134	6.20619	6.22542	6.23956	6.4309	6.22372	0.62062	-0.688218	+	D:\CHENYUWAN\20240212-dia-lumos\ddab-enps-1h-dia-label-fee\Blank-NPs-DIA-Label-free_D:\CHENYUWAN\20240212-dia-lumos\ddab-enps-1h-dia-label-fee\ddab-enps-1h-DIA-Label-free	4.32844	0.000300429	0.207174	18.8198	O94979	O94979;H7BXG7;D6REX3;D6RHZ5;H0Y8V7;H0YAB3;H0Y9K1	SC31A_HUMAN	Protein transport protein Sec31A
6.87836	6.90033	6.89015	6.9322	6.94569	6.94043	6.88962	6.93944	1.12158	0.165528	+	D:\CHENYUWAN\20240212-dia-lumos\ddab-enps-1h-dia-label-fee\Blank-NPs-DIA-Label-free_D:\CHENYUWAN\20240212-dia-lumos\ddab-enps-1h-dia-label-fee\ddab-enps-1h-DIA-Label-free	2.58207	0.00471698	-0.049829	-6.6753	O94992	O94992	HEXI1_HUMAN	Protein HEXIM1
5.71767	5.82324	5.70042	5.82025	5.86586	5.84291	5.74711	5.84301	1.2471	0.318574			1.11119	0.0567763	-0.0959004	-2.36296	O95059	O95059	RPP14_HUMAN	Ribonuclease P protein subunit p14
5.88885	5.91263	5.87892	5.52281	5.65468	5.61701	5.89347	5.59817	0.506641	-0.980964	+	D:\CHENYUWAN\20240212-dia-lumos\ddab-enps-1h-dia-label-fee\Blank-NPs-DIA-Label-free_D:\CHENYUWAN\20240212-dia-lumos\ddab-enps-1h-dia-label-fee\ddab-enps-1h-DIA-Label-free	2.72687	0.00379025	0.2953	7.29671	O95067	O95067;H1UBN3	CCNB2_HUMAN	G2/mitotic-specific cyclin-B2
6.39513	6.38825	6.3836	6.25372	6.22147	6.30182	6.389	6.259	0.741318	-0.431836	+	D:\CHENYUWAN\20240212-dia-lumos\ddab-enps-1h-dia-label-fee\Blank-NPs-DIA-Label-free_D:\CHENYUWAN\20240212-dia-lumos\ddab-enps-1h-dia-label-fee\ddab-enps-1h-DIA-Label-free	2.27682	0.00663652	0.129996	5.51193	O95070	O95070;A6NGW1;E9PS11	YIF1A_HUMAN	Protein YIF1A
6.50145	6.52252	6.51429	6.59861	6.58854	6.5807	6.51275	6.58929	1.1927	0.254229	+	D:\CHENYUWAN\20240212-dia-lumos\ddab-enps-1h-dia-label-fee\Blank-NPs-DIA-Label-free_D:\CHENYUWAN\20240212-dia-lumos\ddab-enps-1h-dia-label-fee\ddab-enps-1h-DIA-Label-free	3.16955	0.00218646	-0.0765309	-9.53059	O95071	O95071;E7EMW7	UBR5_HUMAN	E3 ubiquitin-protein ligase UBR5
5.361	5.46019	5.19823	4.95703	NaN	NaN	5.33981	4.95703	0.414215	-1.27155			0	1	0.382774	0	O95081	O95081;A0A0C4DG34	AGFG2_HUMAN	Arf-GAP domain and FG repeat-containing protein 2
6.12264	6.20038	6.14346	6.08096	6.10877	6.04001	6.1555	6.07658	0.833842	-0.262153			1.21044	0.0452621	0.0789158	2.57585	O95104	O95104	SFR15_HUMAN	Splicing factor, arginine/serine-rich 15
6.89121	6.90685	6.84208	6.89002	6.90422	6.89496	6.88005	6.8964	1.03837	0.0543157			0.338642	0.45582	-0.0163506	-0.819502	O95139	O95139	NDUB6_HUMAN	NADH dehydrogenase [ubiquinone] 1 beta subcomplex subunit 6
6.63178	6.62695	6.63977	6.58748	6.58775	6.60691	6.63283	6.59405	0.914564	-0.128844	+	D:\CHENYUWAN\20240212-dia-lumos\ddab-enps-1h-dia-label-fee\Blank-NPs-DIA-Label-free_D:\CHENYUWAN\20240212-dia-lumos\ddab-enps-1h-dia-label-fee\ddab-enps-1h-DIA-Label-free	2.18996	0.00761679	0.0387861	5.21326	O95140	O95140	MFN2_HUMAN	Mitofusin-2
5.92334	5.90192	5.91641	5.80534	5.7756	5.8525	5.91389	5.81115	0.789329	-0.341302			1.93788	0.0122124	0.102742	4.41699	O95155	O95155;K7EP75	UBE4B_HUMAN	Ubiquitin conjugation factor E4 B
6.82823	6.75005	6.77088	6.92478	6.90274	6.9422	6.78305	6.92324	1.38098	0.465691	+	D:\CHENYUWAN\20240212-dia-lumos\ddab-enps-1h-dia-label-fee\Blank-NPs-DIA-Label-free_D:\CHENYUWAN\20240212-dia-lumos\ddab-enps-1h-dia-label-fee\ddab-enps-1h-DIA-Label-free	2.24157	0.00690305	-0.140186	-5.38911	O95159	O95159;E9PJX1;E9PQA5;E9PNY1;E9PQ47;E9PMQ3;E9PJ47	ZFPL1_HUMAN	Zinc finger protein-like 1
6.10963	6.10764	6.13944	NaN	NaN	5.70693	6.1189	5.70693	0.387277	-1.36856			0	1	0.411979	0	O95163	O95163;F5H2T0	ELP1_HUMAN	Elongator complex protein 1
6.36157	6.439	6.37516	6.39857	6.2953	6.51358	6.39191	6.40249	1.02466	0.0351394			0.0540859	0.952352	-0.0105782	-0.156926	O95167	O95167;H7C2R1;S4R3T6;Q6FGG4;A8MVM8;H7C0D7;A8MYJ8	NDUA3_HUMAN	NADH dehydrogenase [ubiquinone] 1 alpha subcomplex subunit 3
7.05398	7.02932	7.03154	7.01057	7.01746	7.0616	7.03828	7.02988	0.980846	-0.0279009			0.179137	0.795796	0.00839869	0.471261	O95168	O95168;F2Z3P9;C9JXQ9	NDUB4_HUMAN	NADH dehydrogenase [ubiquinone] 1 beta subcomplex subunit 4
6.99231	6.98126	6.97173	7.01286	7.00877	7.0003	6.98177	7.00731	1.06058	0.0848553			1.66102	0.0193177	-0.025544	-3.64714	O95169	O95169;K9J7I2;E9PQ68	NDUB8_HUMAN	NADH dehydrogenase [ubiquinone] 1 beta subcomplex subunit 8, mitochondrial
6.82665	6.83803	6.83971	6.8575	6.85376	6.85549	6.83479	6.85558	1.04903	0.0690551	+	D:\CHENYUWAN\20240212-dia-lumos\ddab-enps-1h-dia-label-fee\Blank-NPs-DIA-Label-free_D:\CHENYUWAN\20240212-dia-lumos\ddab-enps-1h-dia-label-fee\ddab-enps-1h-DIA-Label-free	2.09507	0.00911861	-0.0207877	-4.90174	O95182	O95182	NDUA7_HUMAN	NADH dehydrogenase [ubiquinone] 1 alpha subcomplex subunit 7
7.53655	7.53264	7.54292	7.55739	7.57513	7.54778	7.53737	7.5601	1.05373	0.0755096			1.24813	0.0426473	-0.0227304	-2.65854	O95197	O95197	RTN3_HUMAN	Reticulon-3
6.97085	6.97532	6.95952	6.96508	6.97254	6.97251	6.96856	6.97004	1.00342	0.00492199			0.100014	0.898499	-0.00148169	-0.278682	O95202	O95202	LETM1_HUMAN	LETM1 and EF-hand domain-containing protein 1, mitochondrial
5.4444	5.47241	5.46294	5.54477	5.4854	5.56434	5.45992	5.53151	1.17921	0.237815			1.33358	0.0366121	-0.0715892	-2.85013	O95208	O95208;I3L2B2;I3L2H1;I3L356	EPN2_HUMAN	Epsin-2
5.32183	5.52069	5.4421	5.25799	5.12636	NaN	5.42821	5.19217	0.580718	-0.784091			1.1107	0.0568025	0.236036	2.64235	O95210	O95210	STBD1_HUMAN	Starch-binding domain-containing protein 1
5.40339	5.50247	5.44195	5.40642	5.3306	5.33856	5.44927	5.35853	0.811441	-0.301442			1.13642	0.0536691	0.0907429	2.41646	O95214	O95214;H0YBC1;E5RHU8;E5RIL0;C9JVM4;E5RJS9	LERL1_HUMAN	Leptin receptor overlapping transcript-like 1
6.55018	6.53557	6.54637	6.63393	6.64054	6.6021	6.54404	6.62552	1.20638	0.270687	+	D:\CHENYUWAN\20240212-dia-lumos\ddab-enps-1h-dia-label-fee\Blank-NPs-DIA-Label-free_D:\CHENYUWAN\20240212-dia-lumos\ddab-enps-1h-dia-label-fee\ddab-enps-1h-DIA-Label-free	2.52513	0.00526728	-0.0814853	-6.44386	O95218	O95218	ZRAB2_HUMAN	Zinc finger Ran-binding domain-containing protein 2
5.79713	5.83	5.80719	5.74628	5.76685	5.73879	5.81144	5.75064	0.869358	-0.201978	+	D:\CHENYUWAN\20240212-dia-lumos\ddab-enps-1h-dia-label-fee\Blank-NPs-DIA-Label-free_D:\CHENYUWAN\20240212-dia-lumos\ddab-enps-1h-dia-label-fee\ddab-enps-1h-DIA-Label-free	2.04216	0.00975236	0.0608012	4.73436	O95219	O95219;F8W9T3	SNX4_HUMAN	Sorting nexin-4
5.7381	5.75131	5.81127	5.84361	5.78712	5.83089	5.76689	5.82054	1.13147	0.178204			0.883858	0.0961052	-0.0536448	-1.8972	O95229	O95229;A6NH27	ZWINT_HUMAN	ZW10 interactor
6.89282	6.89314	6.89459	6.88175	6.88753	6.87495	6.89351	6.88141	0.972513	-0.0402108			1.52081	0.0250569	0.0121051	3.29256	O95232	O95232;C9JL41;D6RDI2;J3KPP4;H7C5U7	LC7L3_HUMAN	Luc7-like protein 3
6.2163	6.21628	6.20284	6.13756	6.12805	6.13043	6.21181	6.13201	0.832151	-0.265082	+	D:\CHENYUWAN\20240212-dia-lumos\ddab-enps-1h-dia-label-fee\Blank-NPs-DIA-Label-free_D:\CHENYUWAN\20240212-dia-lumos\ddab-enps-1h-dia-label-fee\ddab-enps-1h-DIA-Label-free	3.9399	0.000474359	0.0797979	15.0081	O95235	O95235	KI20A_HUMAN	Kinesin-like protein KIF20A
6.28992	6.26881	6.32192	6.31598	6.29359	6.27377	6.29355	6.29445	1.00207	0.00298641			0.0151424	0.995728	-0.000899315	-0.0457076	O95239	O95239;Q2VIQ3	KIF4A_HUMAN	Chromosome-associated kinesin KIF4A
5.73192	5.7046	5.75034	5.76856	5.74437	5.73375	5.72895	5.74889	1.04698	0.0662359			0.521034	0.245464	-0.0199386	-1.18594	O95243	O95243	MBD4_HUMAN	Methyl-CpG-binding domain protein 4
5.44152	5.49193	5.33301	5.73361	5.69097	5.75135	5.42215	5.72531	2.00982	1.00707	+	D:\CHENYUWAN\20240212-dia-lumos\ddab-enps-1h-dia-label-fee\Blank-NPs-DIA-Label-free_D:\CHENYUWAN\20240212-dia-lumos\ddab-enps-1h-dia-label-fee\ddab-enps-1h-DIA-Label-free	2.42137	0.00552883	-0.303158	-6.03965	O95248	Q86WG5;O95248;G5E933;H0Y5W8	MTMR5_HUMAN	Myotubularin-related protein 5
6.22664	6.21004	6.24133	6.20839	6.22632	6.18551	6.226	6.20674	0.956604	-0.0640058			0.577049	0.210534	0.0192672	1.29561	O95249	O95249;K7EJC8;E9PCW1;G5E9T8	GOSR1_HUMAN	Golgi SNAP receptor complex member 1
6.04575	6.08409	6.03845	6.09039	6.03549	6.0801	6.05609	6.06866	1.02936	0.0417478			0.222955	0.721834	-0.0125669	-0.571122	O95251	O95251;E7EUP3	KAT7_HUMAN	Histone acetyltransferase KAT7
5.75826	5.79145	5.77162	5.62775	5.60423	5.67263	5.77377	5.63487	0.726269	-0.461424	+	D:\CHENYUWAN\20240212-dia-lumos\ddab-enps-1h-dia-label-fee\Blank-NPs-DIA-Label-free_D:\CHENYUWAN\20240212-dia-lumos\ddab-enps-1h-dia-label-fee\ddab-enps-1h-DIA-Label-free	2.47359	0.00525332	0.138902	6.2403	O95274	O95274	LYPD3_HUMAN	Ly6/PLAUR domain-containing protein 3
6.85733	6.87555	6.8601	6.82872	6.8151	6.80474	6.86433	6.81619	0.895086	-0.159901	+	D:\CHENYUWAN\20240212-dia-lumos\ddab-enps-1h-dia-label-fee\Blank-NPs-DIA-Label-free_D:\CHENYUWAN\20240212-dia-lumos\ddab-enps-1h-dia-label-fee\ddab-enps-1h-DIA-Label-free	2.23609	0.00710817	0.0481353	5.37024	O95292	O95292	VAPB_HUMAN	Vesicle-associated membrane protein-associated protein B/C
5.8025	5.88007	5.77434	5.6983	5.73984	5.63336	5.81897	5.6905	0.743923	-0.426775			1.35645	0.0353213	0.128472	2.90244	O95295	O95295	SNAPN_HUMAN	SNARE-associated protein Snapin
6.43131	6.4684	6.44546	6.47672	6.42757	6.49254	6.44839	6.46561	1.04044	0.0571925			0.315114	0.506309	-0.0172168	-0.770391	O95297	O95297	MPZL1_HUMAN	Myelin protein zero-like protein 1
7.04025	7.03332	7.01744	6.96977	6.99612	6.9819	7.03034	6.9826	0.895902	-0.158587			2.02803	0.0100207	0.0477395	4.69039	O95298	O95298;E9PRJ5	NDUC2_HUMAN	NADH dehydrogenase [ubiquinone] 1 subunit C2
6.71168	6.69433	6.7007	6.68684	6.71006	6.63872	6.70223	6.67854	0.946902	-0.0787131			0.475683	0.283556	0.0236948	1.09651	O95299	O95299;E7ESZ7;A0A087WXC5	NDUAA_HUMAN	NADH dehydrogenase [ubiquinone] 1 alpha subcomplex subunit 10, mitochondrial
6.8683	6.86435	6.87547	6.7371	6.76182	6.7553	6.86937	6.75141	0.762141	-0.39187	+	D:\CHENYUWAN\20240212-dia-lumos\ddab-enps-1h-dia-label-fee\Blank-NPs-DIA-Label-free_D:\CHENYUWAN\20240212-dia-lumos\ddab-enps-1h-dia-label-fee\ddab-enps-1h-DIA-Label-free	3.89214	0.000453292	0.117965	14.5951	O95302	O95302	FKBP9_HUMAN	Peptidyl-prolyl cis-trans isomerase FKBP9
6.32939	6.28701	6.32218	6.26273	6.26457	6.23787	6.31286	6.25506	0.875377	-0.192023			1.67688	0.0190595	0.0578047	3.68864	O95336	O95336;M0R261;M0R0U3;M0R1L2	6PGL_HUMAN	6-phosphogluconolactonase
6.24062	6.22846	6.26795	6.56714	6.55612	6.56649	6.24568	6.56325	2.07766	1.05496	+	D:\CHENYUWAN\20240212-dia-lumos\ddab-enps-1h-dia-label-fee\Blank-NPs-DIA-Label-free_D:\CHENYUWAN\20240212-dia-lumos\ddab-enps-1h-dia-label-fee\ddab-enps-1h-DIA-Label-free	4.88675	0.000459016	-0.317575	-26.0111	O95340	O95340	PAPS2_HUMAN	Bifunctional 3'-phosphoadenosine 5'-phosphosulfate synthase 2
6.57642	6.58088	6.58693	6.45995	6.45785	6.43916	6.58141	6.45232	0.742865	-0.428828	+	D:\CHENYUWAN\20240212-dia-lumos\ddab-enps-1h-dia-label-fee\Blank-NPs-DIA-Label-free_D:\CHENYUWAN\20240212-dia-lumos\ddab-enps-1h-dia-label-fee\ddab-enps-1h-DIA-Label-free	4.22748	0.00027668	0.12909	17.7469	O95347	O95347	SMC2_HUMAN	Structural maintenance of chromosomes protein 2
6.31079	6.31843	6.29539	6.3655	6.36794	6.38625	6.3082	6.37323	1.16152	0.216012	+	D:\CHENYUWAN\20240212-dia-lumos\ddab-enps-1h-dia-label-fee\Blank-NPs-DIA-Label-free_D:\CHENYUWAN\20240212-dia-lumos\ddab-enps-1h-dia-label-fee\ddab-enps-1h-DIA-Label-free	2.63603	0.00401946	-0.0650261	-6.90127	O95363	O95363	SYFM_HUMAN	Phenylalanine--tRNA ligase, mitochondrial
5.91427	5.91455	5.85528	5.94786	5.83715	5.819	5.8947	5.868	0.940385	-0.0886767			0.233864	0.701605	0.0266943	0.595398	O95365	O95365	ZBT7A_HUMAN	Zinc finger and BTB domain-containing protein 7A
5.49237	5.49154	5.54761	NaN	5.06391	5.27824	5.5105	5.17107	0.457687	-1.12757			1.57261	0.0227425	0.339431	4.07048	O95372	O95372;Q5QPQ0	LYPA2_HUMAN	Acyl-protein thioesterase 2
6.91674	6.92793	6.90315	6.53887	6.51411	6.53588	6.91594	6.52962	0.410847	-1.28333	+	D:\CHENYUWAN\20240212-dia-lumos\ddab-enps-1h-dia-label-fee\Blank-NPs-DIA-Label-free_D:\CHENYUWAN\20240212-dia-lumos\ddab-enps-1h-dia-label-fee\ddab-enps-1h-DIA-Label-free	5.47177	0	0.38632	36.47	O95373	O95373	IPO7_HUMAN	Importin-7
4.82334	NaN	4.87971	NaN	4.5404	NaN	4.85153	4.5404	0.488509	-1.03354			0	1	0.311127	0	O95379	O95379;E5RIJ3;D6RCM8	TFIP8_HUMAN	Tumor necrosis factor alpha-induced protein 8
5.77758	5.87225	5.80462	5.90902	5.83998	5.89522	5.81815	5.88141	1.15681	0.210154			0.83411	0.108272	-0.0632625	-1.79836	O95391	O95391	SLU7_HUMAN	Pre-mRNA-splicing factor SLU7
5.52563	5.50373	5.68982	5.59567	5.60393	5.75223	5.57306	5.65061	1.1955	0.25761			0.426336	0.331268	-0.0775482	-0.99818	O95394	O95394;A0A087WT27;J3KN95;D6RIS6	AGM1_HUMAN	Phosphoacetylglucosamine mutase
6.78565	6.77884	6.78731	6.80885	6.81448	6.79459	6.78394	6.80597	1.05205	0.0732075			1.56841	0.0227636	-0.0220383	-3.41054	O95400	O95400	CD2B2_HUMAN	CD2 antigen cytoplasmic tail-binding protein 2
5.41621	NaN	NaN	5.4491	5.44374	5.25424	5.41621	5.38236	0.925018	-0.112447			0	1	0.0338502	0	O95402	O95402;M0R064;M0R2Y4;B8ZZF3	MED26_HUMAN	Mediator of RNA polymerase II transcription subunit 26
6.10331	6.07395	6.04411	6.01918	6.02576	6.14632	6.07379	6.06375	0.977152	-0.0333455			0.0791402	0.923031	0.0100377	0.224442	O95406	O95406;G3V4K0;G3V3B2;G3V5P8	CNIH1_HUMAN	Protein cornichon homolog 1
5.79529	5.85673	5.80224	5.84645	5.79129	5.85877	5.81809	5.83217	1.03296	0.0467838			0.189612	0.777468	-0.0140831	-0.495504	O95415	O95415;F5GXW6	BRI3_HUMAN	Brain protein I3
6.34999	6.33758	6.36866	6.33614	6.33262	6.32313	6.35208	6.33063	0.95182	-0.0712399			1.02357	0.0698901	0.0214451	2.18027	O95425	O95425	SVIL_HUMAN	Supervillin
5.6097	5.83006	5.83686	NaN	5.30204	5.49224	5.75887	5.39714	0.43478	-1.20164			1.24756	0.0426577	0.36173	3.02465	O95427	O95427;K7EID9;K7ESH9;K7ELE1;K7ERX5;K7EL34;K7EQG0;K7EK83	PIGN_HUMAN	GPI ethanolamine phosphate transferase 1
5.81834	5.76138	5.81372	5.84724	5.79376	5.86586	5.79781	5.83562	1.09096	0.125601			0.597898	0.199321	-0.03781	-1.33628	O95429	O95429;H0YBT1	BAG4_HUMAN	BAG family molecular chaperone regulator 4
6.51374	6.50036	6.49548	6.31761	6.36416	6.27924	6.50319	6.32034	0.656364	-0.607432	+	D:\CHENYUWAN\20240212-dia-lumos\ddab-enps-1h-dia-label-fee\Blank-NPs-DIA-Label-free_D:\CHENYUWAN\20240212-dia-lumos\ddab-enps-1h-dia-label-fee\ddab-enps-1h-DIA-Label-free	2.72083	0.00383223	0.182855	7.2698	O95433	O95433;G3V438;H0YJU2	AHSA1_HUMAN	Activator of 90 kDa heat shock protein ATPase homolog 1
6.46249	6.44796	6.46728	6.47381	6.4727	6.48737	6.45924	6.47796	1.04404	0.0621732			1.17584	0.0489466	-0.0187163	-2.50087	O95453	O95453	PARN_HUMAN	Poly(A)-specific ribonuclease PARN
5.98518	5.99247	5.96756	5.96715	6.05582	5.99221	5.98174	6.00506	1.05517	0.0774718			0.353809	0.429776	-0.0233215	-0.850862	O95456	O95456	PSMG1_HUMAN	Proteasome assembly chaperone 1
5.86237	5.85933	5.92088	5.99151	6.06268	6.0324	5.88086	6.02886	1.40606	0.491656	+	D:\CHENYUWAN\20240212-dia-lumos\ddab-enps-1h-dia-label-fee\Blank-NPs-DIA-Label-free_D:\CHENYUWAN\20240212-dia-lumos\ddab-enps-1h-dia-label-fee\ddab-enps-1h-DIA-Label-free	2.17048	0.00801708	-0.148004	-5.1481	O95466	O95466	FMNL1_HUMAN	Formin-like protein 1
6.5394	6.53395	6.52967	6.49467	6.4976	6.52482	6.53434	6.5057	0.936168	-0.09516			1.33949	0.0361097	0.0286455	2.8636	O95470	O95470	SGPL1_HUMAN	Sphingosine-1-phosphate lyase 1
7.10641	7.09831	7.11302	7.16322	7.16059	7.15501	7.10591	7.1596	1.1316	0.178359	+	D:\CHENYUWAN\20240212-dia-lumos\ddab-enps-1h-dia-label-fee\Blank-NPs-DIA-Label-free_D:\CHENYUWAN\20240212-dia-lumos\ddab-enps-1h-dia-label-fee\ddab-enps-1h-DIA-Label-free	3.40626	0.00156836	-0.0536914	-10.9693	O95478	O95478;A0A0A0MQZ6;H0YAI9	NSA2_HUMAN	Ribosome biogenesis protein NSA2 homolog
5.2845	5.23283	5.17148	5.17234	5.10429	5.18935	5.2296	5.15533	0.842796	-0.246744			0.824538	0.110591	0.0742768	1.77943	O95479	O95479;R4GMU1	G6PE_HUMAN	GDH/6PGL endoplasmic bifunctional protein
5.54389	5.52822	5.55271	5.32214	5.32792	5.2656	5.54161	5.30522	0.580244	-0.785268	+	D:\CHENYUWAN\20240212-dia-lumos\ddab-enps-1h-dia-label-fee\Blank-NPs-DIA-Label-free_D:\CHENYUWAN\20240212-dia-lumos\ddab-enps-1h-dia-label-fee\ddab-enps-1h-DIA-Label-free	3.43936	0.00150865	0.23639	11.1861	O95486	O95486	SC24A_HUMAN	Protein transport protein Sec24A
6.09667	6.12557	6.08293	5.98359	5.93526	5.88464	6.10172	5.9345	0.680415	-0.555514	+	D:\CHENYUWAN\20240212-dia-lumos\ddab-enps-1h-dia-label-fee\Blank-NPs-DIA-Label-free_D:\CHENYUWAN\20240212-dia-lumos\ddab-enps-1h-dia-label-fee\ddab-enps-1h-DIA-Label-free	2.23272	0.00716869	0.167226	5.35862	O95487	O95487	SC24B_HUMAN	Protein transport protein Sec24B
NaN	5.42375	NaN	5.73954	5.72954	5.67201	5.42375	5.7137	1.94958	0.963162			0	1	-0.28994	0	O95503	O95503;B0QXZ6	CBX6_HUMAN	Chromobox protein homolog 6
NaN	NaN	5.56438	5.36724	NaN	NaN	5.56438	5.36724	0.635129	-0.654878			0	1	0.197137	0	O95551	O95551;X6R5A3	TYDP2_HUMAN	Tyrosyl-DNA phosphodiesterase 2
5.96041	5.969	5.88819	5.94056	5.77731	5.90878	5.9392	5.87555	0.863676	-0.211437			0.494348	0.266868	0.0636492	1.13341	O95562	O95562;Q5TIH2	SFT2B_HUMAN	Vesicle transport protein SFT2B
6.34996	6.35009	6.35068	6.37636	6.366	6.34978	6.35024	6.36405	1.0323	0.0458559			0.826945	0.109946	-0.0138043	-1.78419	O95563	O95563;Q5R3B4	MPC2_HUMAN	Mitochondrial pyruvate carrier 2
6.82841	6.81621	6.81933	6.82928	6.83884	6.83674	6.82132	6.83495	1.03189	0.0452956			1.36492	0.0348681	-0.0136356	-2.92193	O95571	O95571;M0QXB5	ETHE1_HUMAN	Persulfide dioxygenase ETHE1, mitochondrial
7.22134	7.21572	7.22466	7.16205	7.17037	7.1785	7.22057	7.17031	0.890708	-0.166976	+	D:\CHENYUWAN\20240212-dia-lumos\ddab-enps-1h-dia-label-fee\Blank-NPs-DIA-Label-free_D:\CHENYUWAN\20240212-dia-lumos\ddab-enps-1h-dia-label-fee\ddab-enps-1h-DIA-Label-free	3.12463	0.00213002	0.0502642	9.27833	O95573	O95573	ACSL3_HUMAN	Long-chain-fatty-acid--CoA ligase 3
6.35576	6.34599	6.35714	6.3695	6.34957	6.34186	6.35296	6.35364	1.00156	0.00225337			0.0253734	0.984782	-0.000678062	-0.0757578	O95602	O95602;B9ZVN9	RPA1_HUMAN	DNA-directed RNA polymerase I subunit RPA1
6.06235	6.06055	6.02582	6.09685	6.05893	6.06428	6.04957	6.07335	1.05629	0.0790021			0.639243	0.17744	-0.0237821	-1.41684	O95613	O95613	PCNT_HUMAN	Pericentrin
6.05628	6.13743	6.14071	6.10535	6.19369	6.10131	6.11147	6.13345	1.05191	0.0730127			0.208089	0.749512	-0.0219792	-0.537686	O95619	O95619;F8W0J4	YETS4_HUMAN	YEATS domain-containing protein 4
5.39657	5.48199	5.48524	5.21227	5.2615	5.22168	5.4546	5.23182	0.598708	-0.740076	+	D:\CHENYUWAN\20240212-dia-lumos\ddab-enps-1h-dia-label-fee\Blank-NPs-DIA-Label-free_D:\CHENYUWAN\20240212-dia-lumos\ddab-enps-1h-dia-label-fee\ddab-enps-1h-DIA-Label-free	2.61432	0.00427766	0.222785	6.80958	O95625	O95625	ZBT11_HUMAN	Zinc finger and BTB domain-containing protein 11
5.47273	5.47149	5.44697	5.24235	5.27023	5.08434	5.46373	5.19897	0.543557	-0.879496			1.97462	0.0111762	0.264754	4.52696	O95633	O95633;A0A087X1Q2	FSTL3_HUMAN	Follistatin-related protein 3
6.70848	6.70605	6.68621	6.76251	6.71775	6.70657	6.70025	6.72894	1.06831	0.0953283			0.708682	0.147767	-0.0286965	-1.55215	O95639	O95639;C9JEV9;F8WEL7	CPSF4_HUMAN	Cleavage and polyadenylation specificity factor subunit 4
6.04599	6.05434	6.00974	5.96765	5.95122	5.82085	6.03669	5.91324	0.752568	-0.410105			1.19855	0.0463852	0.123454	2.54998	O95674	O95674	CDS2_HUMAN	Phosphatidate cytidylyltransferase 2
5.49902	5.37402	NaN	5.65616	5.70566	5.75666	5.43652	5.70616	1.86055	0.89573			1.69127	0.0187497	-0.269642	-4.51089	O95684	O95684	FR1OP_HUMAN	FGFR1 oncogene partner
6.03111	6.01857	5.95363	6.00668	6.02554	5.98835	6.0011	6.00686	1.01334	0.0191199			0.077022	0.925947	-0.00575574	-0.218841	O95696	O95696;J3KQ61	BRD1_HUMAN	Bromodomain-containing protein 1
6.37646	6.37861	6.42118	6.44053	6.44615	6.39971	6.39209	6.4288	1.08821	0.121954			0.823958	0.110648	-0.0367119	-1.77829	O95707	O95707;K7EQV2	RPP29_HUMAN	Ribonuclease P protein subunit p29
5.28067	5.33395	5.42263	5.28317	4.83723	NaN	5.34575	5.0602	0.518144	-0.948574			0.698056	0.151181	0.285549	1.63569	O95714	O95714	HERC2_HUMAN	E3 ubiquitin-protein ligase HERC2
6.11239	6.09521	6.08662	5.80692	5.77954	5.7869	6.09807	5.79112	0.493229	-1.01967	+	D:\CHENYUWAN\20240212-dia-lumos\ddab-enps-1h-dia-label-fee\Blank-NPs-DIA-Label-free_D:\CHENYUWAN\20240212-dia-lumos\ddab-enps-1h-dia-label-fee\ddab-enps-1h-DIA-Label-free	4.98511	0.000503597	0.306951	27.5335	O95721	O95721;C9JAF7	SNP29_HUMAN	Synaptosomal-associated protein 29
6.62946	6.61848	6.68631	6.39253	6.40028	6.41729	6.64475	6.40337	0.57361	-0.801857	+	D:\CHENYUWAN\20240212-dia-lumos\ddab-enps-1h-dia-label-fee\Blank-NPs-DIA-Label-free_D:\CHENYUWAN\20240212-dia-lumos\ddab-enps-1h-dia-label-fee\ddab-enps-1h-DIA-Label-free	3.3872	0.00169507	0.241383	10.8463	O95747	O95747;C9JIG9	OXSR1_HUMAN	Serine/threonine-protein kinase OSR1
6.64269	6.65357	6.63861	6.63807	6.63415	6.62771	6.64496	6.63331	0.973538	-0.0386905			1.0142	0.0714885	0.0116471	2.16097	O95757	O95757;E9PDE8	HS74L_HUMAN	Heat shock 70 kDa protein 4L
6.61946	6.62361	6.59402	6.56521	6.55822	6.60151	6.61236	6.57498	0.917519	-0.12419			1.07833	0.0625391	0.037385	2.29391	O95758	O95758;X6R242	PTBP3_HUMAN	Polypyrimidine tract-binding protein 3
6.35748	6.38489	6.39487	6.36049	6.39201	6.40077	6.37908	6.38442	1.01238	0.0177446			0.117309	0.877324	-0.00534185	-0.322407	O95772	O95772;C9JPX5;C9JJ39;C9J3F5;C9JKL2	MENTO_HUMAN	MLN64 N-terminal domain homolog
6.7475	6.74324	6.75486	6.83089	6.84839	6.8138	6.74853	6.83102	1.20918	0.274027	+	D:\CHENYUWAN\20240212-dia-lumos\ddab-enps-1h-dia-label-fee\Blank-NPs-DIA-Label-free_D:\CHENYUWAN\20240212-dia-lumos\ddab-enps-1h-dia-label-fee\ddab-enps-1h-DIA-Label-free	2.84121	0.00326492	-0.0824906	-7.82289	O95777	O95777;C9JIZ0;F2Z2Y6;C9JNV3	LSM8_HUMAN	U6 snRNA-associated Sm-like protein LSm8
7.12833	7.12385	7.12065	7.17342	7.16406	7.16979	7.12427	7.16909	1.10871	0.148884	+	D:\CHENYUWAN\20240212-dia-lumos\ddab-enps-1h-dia-label-fee\Blank-NPs-DIA-Label-free_D:\CHENYUWAN\20240212-dia-lumos\ddab-enps-1h-dia-label-fee\ddab-enps-1h-DIA-Label-free	3.65964	0.000812749	-0.0448186	-12.7361	O95782	O95782	AP2A1_HUMAN	AP-2 complex subunit alpha-1
6.46834	6.49196	6.45994	6.53388	6.51622	6.53591	6.47341	6.52867	1.13569	0.183563	+	D:\CHENYUWAN\20240212-dia-lumos\ddab-enps-1h-dia-label-fee\Blank-NPs-DIA-Label-free_D:\CHENYUWAN\20240212-dia-lumos\ddab-enps-1h-dia-label-fee\ddab-enps-1h-DIA-Label-free	2.07201	0.00947187	-0.0552578	-4.82825	O95785	O95785;B9EGQ5;M0QXA7	WIZ_HUMAN	Protein Wiz
5.96977	6.01775	5.96018	NaN	NaN	5.89198	5.98257	5.89198	0.81174	-0.30091			0	1	0.090583	0	O95786	O95786;A2A376	DDX58_HUMAN	Probable ATP-dependent RNA helicase DDX58
5.5379	5.67311	5.62186	5.76581	NaN	NaN	5.61096	5.76581	1.4284	0.514401			0	1	-0.15485	0	O95793	O95793;Q5JW30;Q5JW28;F6UDC6;A0A087X1A5	STAU1_HUMAN	Double-stranded RNA-binding protein Staufen homolog 1
6.30584	6.36527	6.35662	6.29194	6.29843	6.25189	6.34258	6.28075	0.867316	-0.20537			1.23213	0.0436142	0.0618229	2.62331	O95807	O95807	TM50A_HUMAN	Transmembrane protein 50A
7.08006	7.06041	7.06647	7.0012	7.0027	7.00579	7.06898	7.00323	0.859501	-0.218429	+	D:\CHENYUWAN\20240212-dia-lumos\ddab-enps-1h-dia-label-fee\Blank-NPs-DIA-Label-free_D:\CHENYUWAN\20240212-dia-lumos\ddab-enps-1h-dia-label-fee\ddab-enps-1h-DIA-Label-free	3.41467	0.00148805	0.0657536	11.0241	O95816	O95816	BAG2_HUMAN	BAG family molecular chaperone regulator 2
6.40979	6.4002	6.38334	6.1813	6.15411	6.12212	6.39778	6.15251	0.568503	-0.814759	+	D:\CHENYUWAN\20240212-dia-lumos\ddab-enps-1h-dia-label-fee\Blank-NPs-DIA-Label-free_D:\CHENYUWAN\20240212-dia-lumos\ddab-enps-1h-dia-label-fee\ddab-enps-1h-DIA-Label-free	3.70362	0.000563611	0.245267	13.0693	O95817	O95817	BAG3_HUMAN	BAG family molecular chaperone regulator 3
6.02033	6.0151	5.99812	5.89061	5.81175	5.81009	6.01118	5.83748	0.67035	-0.577013	+	D:\CHENYUWAN\20240212-dia-lumos\ddab-enps-1h-dia-label-fee\Blank-NPs-DIA-Label-free_D:\CHENYUWAN\20240212-dia-lumos\ddab-enps-1h-dia-label-fee\ddab-enps-1h-DIA-Label-free	2.49889	0.00523492	0.173698	6.33951	O95819	Q9UKE5;O95819;Q8N4C8;A0A0D9SEY1;E7ESS2;G3XAA2;H7C360;E7ENQ1;E7EX83;C9J840;G5E948;A0A0D9SG62;H7C0P6;E7EN19	M4K4_HUMAN	Mitogen-activated protein kinase kinase kinase kinase 4
5.35196	NaN	5.38773	5.41568	5.51644	5.37512	5.36984	5.43574	1.16386	0.21892			0.490725	0.269554	-0.0659016	-1.17998	O95822	O95822	DCMC_HUMAN	Malonyl-CoA decarboxylase, mitochondrial
7.19028	7.18941	7.19484	7.17639	7.16249	7.16714	7.19151	7.16867	0.948765	-0.0758773	+	D:\CHENYUWAN\20240212-dia-lumos\ddab-enps-1h-dia-label-fee\Blank-NPs-DIA-Label-free_D:\CHENYUWAN\20240212-dia-lumos\ddab-enps-1h-dia-label-fee\ddab-enps-1h-DIA-Label-free	2.17681	0.00789491	0.0228415	5.1692	O95831	O95831;E9PMA0	AIFM1_HUMAN	Apoptosis-inducing factor 1, mitochondrial
6.48309	6.50697	6.47842	6.41369	6.35518	6.43048	6.48949	6.39978	0.813375	-0.298007			1.66786	0.0190962	0.089709	3.66501	O95832	O95832	CLD1_HUMAN	Claudin-1
5.93805	6.02073	6.01607	5.95021	6.02209	6.05565	5.99162	6.00932	1.0416	0.0588037			0.162007	0.820215	-0.0177018	-0.431056	O95857	O95857	TSN13_HUMAN	Tetraspanin-13
5.57848	5.5933	NaN	NaN	5.43426	5.46371	5.58589	5.44899	0.729624	-0.454775			1.84812	0.0144162	0.136902	8.30614	O95861	O95861;F8W1J0;A6NF51	BPNT1_HUMAN	3'(2'),5'-bisphosphate nucleotidase 1
6.60656	6.60956	6.59428	6.58279	6.60159	6.57996	6.60347	6.58812	0.965272	-0.0509927			0.866348	0.0998877	0.01535	1.86232	O95870	O95870;A0A0G2JJD3	ABHGA_HUMAN	Protein ABHD16A
5.62688	5.62756	5.61207	5.74056	5.6952	5.74417	5.62217	5.72664	1.27195	0.347041	+	D:\CHENYUWAN\20240212-dia-lumos\ddab-enps-1h-dia-label-fee\Blank-NPs-DIA-Label-free_D:\CHENYUWAN\20240212-dia-lumos\ddab-enps-1h-dia-label-fee\ddab-enps-1h-DIA-Label-free	2.49225	0.00521483	-0.104469	-6.31334	O95873	O95873	CF047_HUMAN	Uncharacterized protein C6orf47
7.3445	7.3252	7.33159	7.19961	7.22378	7.23518	7.33376	7.21952	0.768704	-0.3795	+	D:\CHENYUWAN\20240212-dia-lumos\ddab-enps-1h-dia-label-fee\Blank-NPs-DIA-Label-free_D:\CHENYUWAN\20240212-dia-lumos\ddab-enps-1h-dia-label-fee\ddab-enps-1h-DIA-Label-free	3.1786	0.00220376	0.114241	9.5822	O95881	O95881	TXD12_HUMAN	Thioredoxin domain-containing protein 12
6.01781	6.06733	5.99997	6.21056	6.18452	6.2921	6.02837	6.22906	1.5874	0.66667	+	D:\CHENYUWAN\20240212-dia-lumos\ddab-enps-1h-dia-label-fee\Blank-NPs-DIA-Label-free_D:\CHENYUWAN\20240212-dia-lumos\ddab-enps-1h-dia-label-fee\ddab-enps-1h-DIA-Label-free	2.20357	0.00736374	-0.200688	-5.25921	O95900	O95900	TRUB2_HUMAN	Probable tRNA pseudouridine synthase 2
5.76728	5.82935	5.79094	5.71521	5.68809	5.77095	5.79586	5.72475	0.848965	-0.236223			1.1012	0.0583587	0.0711102	2.34191	O95926	O95926	SYF2_HUMAN	Pre-mRNA-splicing factor SYF2
6.32918	6.3126	6.31542	6.31622	6.32375	6.32338	6.31906	6.32112	1.00474	0.00681549			0.133026	0.857468	-0.00205151	-0.361281	O95983	O95983	MBD3_HUMAN	Methyl-CpG-binding domain protein 3
5.81591	5.84162	5.84789	5.71101	5.76825	5.72142	5.83514	5.73356	0.791447	-0.337436	+	D:\CHENYUWAN\20240212-dia-lumos\ddab-enps-1h-dia-label-fee\Blank-NPs-DIA-Label-free_D:\CHENYUWAN\20240212-dia-lumos\ddab-enps-1h-dia-label-fee\ddab-enps-1h-DIA-Label-free	2.1389	0.00821185	0.101578	5.04379	O95985	O95985;H0Y6W0	TOP3B_HUMAN	DNA topoisomerase 3-beta-1
6.84253	6.86399	6.85042	6.83521	6.83669	6.84747	6.85231	6.83979	0.971575	-0.0416027			0.784789	0.121391	0.0125243	1.70112	O96000	O96000;H3BPJ9	NDUBA_HUMAN	NADH dehydrogenase [ubiquinone] 1 beta subcomplex subunit 10
6.73895	6.70061	6.72409	6.66443	6.6872	6.68109	6.72122	6.67757	0.904391	-0.144981			1.53974	0.0241292	0.043644	3.33919	O96005	O96005	CLPT1_HUMAN	Cleft lip and palate transmembrane protein 1
5.94554	6.00497	5.94506	5.76753	5.75303	5.65971	5.96519	5.72675	0.577516	-0.792067	+	D:\CHENYUWAN\20240212-dia-lumos\ddab-enps-1h-dia-label-fee\Blank-NPs-DIA-Label-free_D:\CHENYUWAN\20240212-dia-lumos\ddab-enps-1h-dia-label-fee\ddab-enps-1h-DIA-Label-free	2.43251	0.00551605	0.238436	6.08199	O96006	O96006	ZBED1_HUMAN	Zinc finger BED domain-containing protein 1
7.08462	7.11118	7.10521	7.11374	7.13172	7.13188	7.10034	7.12578	1.06033	0.0845187			1.19021	0.0473156	-0.0254428	-2.53189	O96008	O96008;K7EKG4	TOM40_HUMAN	Mitochondrial import receptor subunit TOM40 homolog
6.37318	6.34262	6.34839	6.29899	6.31065	6.30254	6.35473	6.30406	0.889876	-0.168323	+	D:\CHENYUWAN\20240212-dia-lumos\ddab-enps-1h-dia-label-fee\Blank-NPs-DIA-Label-free_D:\CHENYUWAN\20240212-dia-lumos\ddab-enps-1h-dia-label-fee\ddab-enps-1h-DIA-Label-free	2.14764	0.00816042	0.0506703	5.07248	O96011	O96011	PX11B_HUMAN	Peroxisomal membrane protein 11B
5.23962	5.37482	5.29875	5.42054	5.38121	5.39253	5.3044	5.39809	1.24079	0.311256			1.07845	0.0625419	-0.0936972	-2.29416	O96013	O96013;M0R2X4;M0R0L9;M0R3G6	PAK4_HUMAN	Serine/threonine-protein kinase PAK 4
5.8575	6.00042	5.95213	6.18526	6.21803	6.16446	5.93668	6.18925	1.78882	0.839006	+	D:\CHENYUWAN\20240212-dia-lumos\ddab-enps-1h-dia-label-fee\Blank-NPs-DIA-Label-free_D:\CHENYUWAN\20240212-dia-lumos\ddab-enps-1h-dia-label-fee\ddab-enps-1h-DIA-Label-free	2.31297	0.00638754	-0.252566	-5.64022	O96017	O96017;H0Y820	CHK2_HUMAN	Serine/threonine-protein kinase Chk2
6.97929	6.97795	6.97937	6.98177	6.97602	6.97613	6.97887	6.97798	0.997946	-0.00296648			0.173007	0.803825	0.000892639	0.456956	O96019	O96019;H7C5S0	ACL6A_HUMAN	Actin-like protein 6A
6.19303	6.23468	6.20347	6.25103	6.22873	6.20279	6.2104	6.22752	1.04021	0.0568736			0.38464	0.384411	-0.017121	-0.913974	O96028	O96028	NSD2_HUMAN	Histone-lysine N-methyltransferase NSD2
6.86283	6.85016	6.87343	6.82843	6.85983	6.83793	6.86214	6.84206	0.954818	-0.0667021			0.809661	0.114342	0.0200793	1.75008	P00156	P00156	CYB_HUMAN	Cytochrome b
6.88894	6.89109	6.88101	6.85047	6.8368	6.84731	6.88702	6.84486	0.907497	-0.140036	+	D:\CHENYUWAN\20240212-dia-lumos\ddab-enps-1h-dia-label-fee\Blank-NPs-DIA-Label-free_D:\CHENYUWAN\20240212-dia-lumos\ddab-enps-1h-dia-label-fee\ddab-enps-1h-DIA-Label-free	2.91779	0.00289884	0.0421549	8.1941	P00167	P00167	CYB5_HUMAN	Cytochrome b5
7.83632	7.81448	7.82942	7.84284	7.83939	7.84274	7.82674	7.84165	1.03494	0.0495421			1.07115	0.063383	-0.0149134	-2.27891	P00338	P00338	LDHA_HUMAN	L-lactate dehydrogenase A chain
7.22848	7.2312	7.22416	7.23591	7.21566	7.23839	7.22795	7.22998	1.00471	0.0067723			0.0975593	0.90256	-0.00203864	-0.27239	P00367	P49448;P00367;CON_DHE3_BOVIN	DHE3_HUMAN	Glutamate dehydrogenase 1, mitochondrial
5.99377	5.96602	5.99829	NaN	NaN	5.43044	5.98603	5.43044	0.278235	-1.84562			0	1	0.555588	0	P00374	P00374;B4DM58	DYR_HUMAN	Dihydrofolate reductase
7.3166	7.31945	7.31547	7.2846	7.29643	7.30812	7.31717	7.29638	0.95326	-0.0690585			1.40587	0.0327697	0.0207888	3.01707	P00387	P00387	NB5R3_HUMAN	NADH-cytochrome b5 reductase 3
6.73581	6.74245	6.75496	6.82501	6.82632	6.83107	6.74441	6.82746	1.21076	0.275907	+	D:\CHENYUWAN\20240212-dia-lumos\ddab-enps-1h-dia-label-fee\Blank-NPs-DIA-Label-free_D:\CHENYUWAN\20240212-dia-lumos\ddab-enps-1h-dia-label-fee\ddab-enps-1h-DIA-Label-free	3.8279	0.000433382	-0.0830563	-14.0568	P00390	P00390	GSHR_HUMAN	Glutathione reductase, mitochondrial
6.31118	6.32252	6.30935	6.28887	6.29785	6.31872	6.31435	6.30181	0.971553	-0.0416359			0.571693	0.214031	0.012534	1.28515	P00395	P00395	COX1_HUMAN	Cytochrome c oxidase subunit 1
7.89787	7.90758	7.90877	7.96249	7.9416	7.95859	7.90474	7.95422	1.12068	0.164378	+	D:\CHENYUWAN\20240212-dia-lumos\ddab-enps-1h-dia-label-fee\Blank-NPs-DIA-Label-free_D:\CHENYUWAN\20240212-dia-lumos\ddab-enps-1h-dia-label-fee\ddab-enps-1h-DIA-Label-free	2.61043	0.0045072	-0.0494827	-6.79323	P00403	P00403	COX2_HUMAN	Cytochrome c oxidase subunit 2
5.85808	5.91755	5.91333	5.92393	5.88247	5.91731	5.89632	5.9079	1.02704	0.0384856			0.192463	0.773042	-0.0115854	-0.502061	P00414	P00414	COX3_HUMAN	Cytochrome c oxidase subunit 3
6.24165	6.23797	6.24984	6.27398	6.25897	6.3029	6.24315	6.27862	1.08508	0.117808			1.2461	0.0427954	-0.0354643	-2.65405	P00441	P00441;H7BYH4	SODC_HUMAN	Superoxide dismutase [Cu-Zn]
6.44387	6.42685	6.43087	6.52684	6.51248	6.55173	6.43386	6.53035	1.24879	0.320532	+	D:\CHENYUWAN\20240212-dia-lumos\ddab-enps-1h-dia-label-fee\Blank-NPs-DIA-Label-free_D:\CHENYUWAN\20240212-dia-lumos\ddab-enps-1h-dia-label-fee\ddab-enps-1h-DIA-Label-free	2.81091	0.00328237	-0.0964896	-7.68024	P00491	P00491	PNPH_HUMAN	Purine nucleoside phosphorylase
6.33348	6.36516	6.36876	6.26946	6.27484	6.23578	6.3558	6.26003	0.802099	-0.318148	+	D:\CHENYUWAN\20240212-dia-lumos\ddab-enps-1h-dia-label-fee\Blank-NPs-DIA-Label-free_D:\CHENYUWAN\20240212-dia-lumos\ddab-enps-1h-dia-label-fee\ddab-enps-1h-DIA-Label-free	2.35024	0.00638634	0.0957726	5.775	P00492	P00492	HPRT_HUMAN	Hypoxanthine-guanine phosphoribosyltransferase
7.82246	7.81507	7.81394	7.83718	7.85087	7.85015	7.81716	7.84607	1.06883	0.0960292	+	D:\CHENYUWAN\20240212-dia-lumos\ddab-enps-1h-dia-label-fee\Blank-NPs-DIA-Label-free_D:\CHENYUWAN\20240212-dia-lumos\ddab-enps-1h-dia-label-fee\ddab-enps-1h-DIA-Label-free	2.29285	0.00646119	-0.0289075	-5.5685	P00505	P00505	AATM_HUMAN	Aspartate aminotransferase, mitochondrial
7.30255	7.29767	7.30437	7.30579	7.30625	7.30629	7.30153	7.30611	1.0106	0.0152078			1.07333	0.0632153	-0.00457795	-2.28345	P00533	P00533;Q504U8;E9PFD7	EGFR_HUMAN	Epidermal growth factor receptor
7.12257	7.12067	7.12474	7.18629	7.18211	7.20129	7.12266	7.18989	1.16744	0.223353	+	D:\CHENYUWAN\20240212-dia-lumos\ddab-enps-1h-dia-label-fee\Blank-NPs-DIA-Label-free_D:\CHENYUWAN\20240212-dia-lumos\ddab-enps-1h-dia-label-fee\ddab-enps-1h-DIA-Label-free	3.45954	0.00138947	-0.0672363	-11.3203	P00558	P00558	PGK1_HUMAN	Phosphoglycerate kinase 1
6.65798	6.66466	6.68523	6.34101	6.31175	6.28631	6.66929	6.31302	0.440285	-1.18349	+	D:\CHENYUWAN\20240212-dia-lumos\ddab-enps-1h-dia-label-fee\Blank-NPs-DIA-Label-free_D:\CHENYUWAN\20240212-dia-lumos\ddab-enps-1h-dia-label-fee\ddab-enps-1h-DIA-Label-free	4.43409	0.000324826	0.356266	20.0107	P00568	P00568;Q5T9B7	KAD1_HUMAN	Adenylate kinase isoenzyme 1
6.35271	6.27908	6.3015	7.17856	7.18304	7.18466	6.3111	7.18209	7.43003	2.89337	+	D:\CHENYUWAN\20240212-dia-lumos\ddab-enps-1h-dia-label-fee\Blank-NPs-DIA-Label-free_D:\CHENYUWAN\20240212-dia-lumos\ddab-enps-1h-dia-label-fee\ddab-enps-1h-DIA-Label-free	5.6247	0	-0.87099	-39.8344	P00734	P00734;E9PIT3;CON_IPI00710799.1	THRB_HUMAN	Prothrombin
5.35901	5.40654	5.3854	5.23057	5.20083	5.15828	5.38365	5.19656	0.649991	-0.621507	+	D:\CHENYUWAN\20240212-dia-lumos\ddab-enps-1h-dia-label-fee\Blank-NPs-DIA-Label-free_D:\CHENYUWAN\20240212-dia-lumos\ddab-enps-1h-dia-label-fee\ddab-enps-1h-DIA-Label-free	2.76311	0.00371946	0.187093	7.45994	P00751	P00751;B4E1Z4;E7ETN3;H7C5H1	CFAB_HUMAN	Complement factor B
6.52309	6.54166	6.54429	6.59649	6.57321	6.52207	6.53635	6.56392	1.06555	0.0916011			0.528477	0.240503	-0.0275744	-1.20056	P00846	P00846	ATP6_HUMAN	ATP synthase subunit a
7.05678	7.05276	7.0553	6.88819	6.91113	6.91647	7.05495	6.90527	0.708464	-0.497233	+	D:\CHENYUWAN\20240212-dia-lumos\ddab-enps-1h-dia-label-fee\Blank-NPs-DIA-Label-free_D:\CHENYUWAN\20240212-dia-lumos\ddab-enps-1h-dia-label-fee\ddab-enps-1h-DIA-Label-free	4.16387	0.000265152	0.149682	17.102	P00966	P00966;Q5T6L5;Q5T6L6	ASSY_HUMAN	Argininosuccinate synthase
6.8714	6.86216	6.88617	7.72083	7.73168	7.71954	6.87324	7.72402	7.09206	2.82621	+	D:\CHENYUWAN\20240212-dia-lumos\ddab-enps-1h-dia-label-fee\Blank-NPs-DIA-Label-free_D:\CHENYUWAN\20240212-dia-lumos\ddab-enps-1h-dia-label-fee\ddab-enps-1h-DIA-Label-free	7.33306	0	-0.850773	-106.596	P01008	P01008;Q8TCE1;CON_IPI00688316.2	ANT3_HUMAN	Antithrombin-III
6.64847	6.64026	6.65487	6.8398	6.85591	6.92795	6.64787	6.87456	1.68535	0.753047	+	D:\CHENYUWAN\20240212-dia-lumos\ddab-enps-1h-dia-label-fee\Blank-NPs-DIA-Label-free_D:\CHENYUWAN\20240212-dia-lumos\ddab-enps-1h-dia-label-fee\ddab-enps-1h-DIA-Label-free	2.93202	0.00286337	-0.22669	-8.26483	P01023	P01023;CON_IPI00729194.2	A2MG_HUMAN	Alpha-2-macroglobulin
6.42736	6.40865	6.36817	6.37174	6.40422	6.3635	6.40139	6.37982	0.951538	-0.0716673			0.430337	0.326938	0.0215739	1.0062	P01024	P01024	CO3_HUMAN	Complement C3
6.11891	6.08828	6.08068	6.05741	6.07611	6.05953	6.09596	6.06435	0.929806	-0.104998			1.13511	0.0537598	0.0316073	2.41367	P01033	P01033;Q5H9A7;H0Y789	TIMP1_HUMAN	Metalloproteinase inhibitor 1
6.28238	6.21884	6.26723	6.28464	6.22124	6.2609	6.25615	6.25559	0.998715	-0.00185474			0.00688524	1	0.000558535	0.0209737	P01111	P01111	RASN_HUMAN	GTPase NRas
NaN	5.89278	5.9222	5.91373	5.93118	5.87046	5.90749	5.90512	0.994556	-0.00787574			0.0303767	0.980902	0.00237099	0.0920713	P01112	P01112	RASH_HUMAN	GTPase HRas
7.02771	7.0199	7.04604	7.04273	7.03796	7.07208	7.03122	7.05093	1.04643	0.0654719			0.679409	0.158758	-0.0197086	-1.49507	P01116	P01116	RASK_HUMAN	GTPase KRas
6.27782	6.27409	6.27784	6.12996	6.11584	6.14566	6.27658	6.13049	0.714338	-0.485322	+	D:\CHENYUWAN\20240212-dia-lumos\ddab-enps-1h-dia-label-fee\Blank-NPs-DIA-Label-free_D:\CHENYUWAN\20240212-dia-lumos\ddab-enps-1h-dia-label-fee\ddab-enps-1h-DIA-Label-free	4.13194	0.000399261	0.146097	16.787	P01130	P01130;H0YMD1;J3KMZ9	LDLR_HUMAN	Low-density lipoprotein receptor
6.33117	6.33723	6.2897	6.12842	6.25552	6.21542	6.31937	6.19978	0.759306	-0.397247			1.38209	0.0337288	0.119583	2.96165	P01137	P01137	TGFB1_HUMAN	Transforming growth factor beta-1
NaN	NaN	5.54941	5.50823	NaN	5.58198	5.54941	5.5451	0.990136	-0.0143009			0	1	0.00430489	0	P01876;P01877	P01877;P01876;A0A075B6N7;A0A0G2JMB2	IGHA1_HUMAN;IGHA2_HUMAN	Ig alpha-1 chain C region
7.16176	7.17869	7.16729	7.09776	7.10264	7.11946	7.16925	7.10662	0.865711	-0.208042	+	D:\CHENYUWAN\20240212-dia-lumos\ddab-enps-1h-dia-label-fee\Blank-NPs-DIA-Label-free_D:\CHENYUWAN\20240212-dia-lumos\ddab-enps-1h-dia-label-fee\ddab-enps-1h-DIA-Label-free	2.79208	0.00352012	0.0626273	7.59281	P01891	P18462;P30512;P16189;P16190;P30453;P01891;P30461;P03989;P30479;P30481;P04439;P05534;P30450;P30457;P10316;Q95365;P30480;P30484;Q04826;P30492;P30495;Q29718;P18463;P10319;P30498;P30443;P01892;P30483;P30487;P18464;P18465;Q29836;Q29940;P30486;P30488;P30490;P13746;P30460;P30464;Q31610;P30447;P16188;P10314;P30455;P30456;P30459;P01889;P30462;P30466;P30685;P30475;P30485;P30491;P30493;A0A0G2JIF2;A0A0G2JL56…	1A68_HUMAN	HLA class I histocompatibility antigen, A-68 alpha chain
7.16826	7.13381	7.1531	7.11839	7.14072	7.11333	7.15172	7.12415	0.938479	-0.0916033			0.991073	0.0756851	0.0275755	2.11359	P02042;P68871	P69891;P69892;P02042;P02100;P68871;F8W6P5;E9PEW8;E9PBW4;A8MUF7;E9PFT6;CON_IPI00713928.4;CON_IPI00716455.1	HBB_HUMAN;HBD_HUMAN	Hemoglobin subunit delta
5.35219	5.64577	5.72241	5.59435	NaN	NaN	5.57346	5.59435	1.04929	0.0694073			0	1	-0.0208941	0	P02461	P02461	CO3A1_HUMAN	Collagen alpha-1(III) chain
6.26489	6.18836	6.26082	6.19775	6.19641	6.15483	6.23802	6.183	0.880997	-0.18279			0.898119	0.0926523	0.0550249	1.9257	P02462	P29400;P02462	CO4A1_HUMAN	Collagen alpha-1(IV) chain
5.98697	5.94664	5.97742	5.9776	5.92413	6.01316	5.97034	5.97163	1.00297	0.00428418			0.0149386	0.995691	-0.00128953	-0.0451025	P02533	P02533;CON_IPI00384444.5	K1C14_HUMAN	Keratin, type I cytoskeletal 14
5.76342	5.80652	5.95974	6.26262	6.26755	6.26943	5.84322	6.26653	2.65039	1.40621	+	D:\CHENYUWAN\20240212-dia-lumos\ddab-enps-1h-dia-label-fee\Blank-NPs-DIA-Label-free_D:\CHENYUWAN\20240212-dia-lumos\ddab-enps-1h-dia-label-fee\ddab-enps-1h-DIA-Label-free	2.68272	0.00405169	-0.42331	-7.10209	P02538	O95678;P02538;P48668;CON_IPI00300725.7;CON_IPI00299145.9;CON_IPI00293665.7;CON_IPI00131368.3;CON_IPI00221797.1;CON_IPI00005859.3	K2C6A_HUMAN	Keratin, type II cytoskeletal 6A
8.39438	8.39644	8.39966	8.41284	8.41375	8.41788	8.39683	8.41482	1.04231	0.0597836	+	D:\CHENYUWAN\20240212-dia-lumos\ddab-enps-1h-dia-label-fee\Blank-NPs-DIA-Label-free_D:\CHENYUWAN\20240212-dia-lumos\ddab-enps-1h-dia-label-fee\ddab-enps-1h-DIA-Label-free	2.9275	0.00285619	-0.0179965	-8.24228	P02545	P02545;A0A0C4DGC5;Q5TCI8	LMNA_HUMAN	Prelamin-A/C
6.02975	6.01785	5.99825	7.10143	7.12856	7.14315	6.01528	7.12438	12.8557	3.68434	+	D:\CHENYUWAN\20240212-dia-lumos\ddab-enps-1h-dia-label-fee\Blank-NPs-DIA-Label-free_D:\CHENYUWAN\20240212-dia-lumos\ddab-enps-1h-dia-label-fee\ddab-enps-1h-DIA-Label-free	6.66498	0	-1.1091	-72.5512	P02649	P02649;CON_IPI00712693.1	APOE_HUMAN	Apolipoprotein E
5.70479	5.7472	5.7452	5.45714	5.3943	5.4428	5.7324	5.43141	0.500053	-0.999848	+	D:\CHENYUWAN\20240212-dia-lumos\ddab-enps-1h-dia-label-fee\Blank-NPs-DIA-Label-free_D:\CHENYUWAN\20240212-dia-lumos\ddab-enps-1h-dia-label-fee\ddab-enps-1h-DIA-Label-free	3.66889	0.000550802	0.300985	12.8055	P02656	P02656;B0YIW2	APOC3_HUMAN	Apolipoprotein C-III
6.32419	6.33035	6.3193	6.32645	6.31294	6.32599	6.32461	6.32179	0.993525	-0.00937227			0.19884	0.764107	0.00282129	0.51666	P02751	P02751	FINC_HUMAN	Fibronectin
7.07646	7.0119	7.09547	6.36036	6.35511	6.35336	7.06127	6.35628	0.197243	-2.34195	+	D:\CHENYUWAN\20240212-dia-lumos\ddab-enps-1h-dia-label-fee\Blank-NPs-DIA-Label-free_D:\CHENYUWAN\20240212-dia-lumos\ddab-enps-1h-dia-label-fee\ddab-enps-1h-DIA-Label-free	5.00043	0.000510949	0.704998	27.7786	P02765	P02765;C9JV77;CON_IPI00707101.1	FETUA_HUMAN	Alpha-2-HS-glycoprotein
7.06602	7.08429	7.05801	6.97747	6.96439	6.96123	7.06944	6.9677	0.791146	-0.337984	+	D:\CHENYUWAN\20240212-dia-lumos\ddab-enps-1h-dia-label-fee\Blank-NPs-DIA-Label-free_D:\CHENYUWAN\20240212-dia-lumos\ddab-enps-1h-dia-label-fee\ddab-enps-1h-DIA-Label-free	3.41451	0.00148636	0.101744	11.023	P02768	P02768;A0A0C4DGB6;H0YA55;H7C013;CON_IPI00708398.1;CON_IPI00745872.2	ALBU_HUMAN	Serum albumin
7.89122	7.88249	7.88351	7.84119	7.83322	7.83582	7.88574	7.83674	0.89331	-0.162767	+	D:\CHENYUWAN\20240212-dia-lumos\ddab-enps-1h-dia-label-fee\Blank-NPs-DIA-Label-free_D:\CHENYUWAN\20240212-dia-lumos\ddab-enps-1h-dia-label-fee\ddab-enps-1h-DIA-Label-free	3.7636	0.000417489	0.0489976	13.5372	P02786	P02786;G3V0E5;H7C3V5	TFR1_HUMAN	Transferrin receptor protein 1
6.19237	6.25983	6.22563	6.3749	6.39263	6.40503	6.22594	6.39086	1.46188	0.547829	+	D:\CHENYUWAN\20240212-dia-lumos\ddab-enps-1h-dia-label-fee\Blank-NPs-DIA-Label-free_D:\CHENYUWAN\20240212-dia-lumos\ddab-enps-1h-dia-label-fee\ddab-enps-1h-DIA-Label-free	2.82047	0.00330818	-0.164913	-7.725	P02787	P02787;C9JVG0;CON_IPI00788576.1;CON_SEROTRANS	TRFE_HUMAN	Serotransferrin
6.73781	6.77096	6.77735	6.88923	6.87885	6.90414	6.76204	6.89074	1.34492	0.427526	+	D:\CHENYUWAN\20240212-dia-lumos\ddab-enps-1h-dia-label-fee\Blank-NPs-DIA-Label-free_D:\CHENYUWAN\20240212-dia-lumos\ddab-enps-1h-dia-label-fee\ddab-enps-1h-DIA-Label-free	3.07584	0.00232437	-0.128698	-9.01129	P02788	P02788;E7EQB2;E7ER44;CON_IPI00788576.1;CON_SEROTRANS	TRFL_HUMAN	Lactotransferrin
6.8631	6.81957	6.83367	6.65813	6.65804	6.63834	6.83878	6.65151	0.649717	-0.622117	+	D:\CHENYUWAN\20240212-dia-lumos\ddab-enps-1h-dia-label-fee\Blank-NPs-DIA-Label-free_D:\CHENYUWAN\20240212-dia-lumos\ddab-enps-1h-dia-label-fee\ddab-enps-1h-DIA-Label-free	3.69346	0.000559783	0.187276	12.9916	P02792	P02792	FRIL_HUMAN	Ferritin light chain
7.39089	7.37299	7.38578	7.25181	7.25306	7.26224	7.38322	7.2557	0.745567	-0.42359	+	D:\CHENYUWAN\20240212-dia-lumos\ddab-enps-1h-dia-label-fee\Blank-NPs-DIA-Label-free_D:\CHENYUWAN\20240212-dia-lumos\ddab-enps-1h-dia-label-fee\ddab-enps-1h-DIA-Label-free	4.46634	0.000331754	0.127513	20.3887	P02794	P02794;G3V192;E9PRK8;E9PKY7	FRIH_HUMAN	Ferritin heavy chain
5.40833	5.4192	5.42001	5.17804	5.10409	5.14321	5.41585	5.14178	0.532029	-0.910423	+	D:\CHENYUWAN\20240212-dia-lumos\ddab-enps-1h-dia-label-fee\Blank-NPs-DIA-Label-free_D:\CHENYUWAN\20240212-dia-lumos\ddab-enps-1h-dia-label-fee\ddab-enps-1h-DIA-Label-free	3.64614	0.000802097	0.274065	12.6355	P02795;P13640;P80297	P02795;P04732;P13640;Q8N339;P80297;CON_IPI00702024.3	MT1G_HUMAN;MT1X_HUMAN;MT2_HUMAN	Metallothionein-2
NaN	5.79999	NaN	NaN	5.79338	5.49202	5.79999	5.6427	0.696169	-0.522491			0	1	0.157285	0	P03886	P03886	NU1M_HUMAN	NADH-ubiquinone oxidoreductase chain 1
6.23171	6.30201	6.27754	6.34468	6.33838	6.33578	6.27042	6.33961	1.17272	0.229863			1.53663	0.0244055	-0.0691954	-3.3315	P03891	P03891	NU2M_HUMAN	NADH-ubiquinone oxidoreductase chain 2
6.72923	6.75701	6.71718	6.79014	6.77909	6.82206	6.73447	6.7971	1.15512	0.208038			1.63725	0.0203038	-0.0626262	-3.58549	P03897	P03897	NU3M_HUMAN	NADH-ubiquinone oxidoreductase chain 3
6.78371	6.79878	6.78056	6.84048	6.82833	6.81278	6.78769	6.8272	1.09525	0.131256			1.80505	0.0155891	-0.0395117	-4.03523	P03905	P03905	NU4M_HUMAN	NADH-ubiquinone oxidoreductase chain 4
6.25657	6.24381	6.29213	6.30561	6.25848	6.30677	6.26417	6.29029	1.06198	0.0867621			0.535851	0.235324	-0.0261176	-1.21502	P03915	P03915	NU5M_HUMAN	NADH-ubiquinone oxidoreductase chain 5
6.95821	6.91172	6.93607	6.95604	6.8279	7.01598	6.93533	6.93331	0.99535	-0.00672469			0.0117052	0.999705	0.00202417	0.0354656	P03928	P03928	ATP8_HUMAN	ATP synthase protein 8
6.03613	6.04114	5.94787	5.77049	NaN	5.66773	6.00838	5.71911	0.513726	-0.960929			1.87906	0.0134369	0.289268	5.28531	P03973	P03973	SLPI_HUMAN	Antileukoproteinase
6.8144	6.76216	6.81006	7.62584	7.66142	7.62443	6.79554	7.63723	6.94525	2.79603	+	D:\CHENYUWAN\20240212-dia-lumos\ddab-enps-1h-dia-label-fee\Blank-NPs-DIA-Label-free_D:\CHENYUWAN\20240212-dia-lumos\ddab-enps-1h-dia-label-fee\ddab-enps-1h-DIA-Label-free	5.66426	0	-0.841688	-40.7537	P04004	P04004;CON_IPI00712934.1	VTNC_HUMAN	Vitronectin
6.80424	6.8268	6.81655	6.84092	6.82863	6.84749	6.81586	6.83901	1.05475	0.0768993			1.27015	0.0413725	-0.0231492	-2.70735	P04040	P04040	CATA_HUMAN	Catalase
6.75548	6.73966	6.73499	6.68069	6.69823	6.66808	6.74338	6.68233	0.868877	-0.202776	+	D:\CHENYUWAN\20240212-dia-lumos\ddab-enps-1h-dia-label-fee\Blank-NPs-DIA-Label-free_D:\CHENYUWAN\20240212-dia-lumos\ddab-enps-1h-dia-label-fee\ddab-enps-1h-DIA-Label-free	2.32858	0.00631567	0.0610417	5.69632	P04062	P04062;A0A0G2JLB3;A0A0G2JNZ0;A0A0G2JNZ5	GLCM_HUMAN	Glucosylceramidase
5.79785	5.79992	5.83526	5.89219	5.86161	5.83894	5.81101	5.86425	1.13041	0.176852			1.27205	0.0411233	-0.0532378	-2.71156	P04066	P04066	FUCO_HUMAN	Tissue alpha-L-fucosidase
7.35825	7.36391	7.34882	7.33406	7.33904	7.33086	7.35699	7.33466	0.949867	-0.074203			1.95372	0.0116427	0.0223371	4.46418	P04075	P04075;J3KPS3;H3BR68	ALDOA_HUMAN	Fructose-bisphosphate aldolase A
6.36327	6.39836	6.35841	6.12012	6.12798	6.12468	6.37335	6.12426	0.563525	-0.827448	+	D:\CHENYUWAN\20240212-dia-lumos\ddab-enps-1h-dia-label-fee\Blank-NPs-DIA-Label-free_D:\CHENYUWAN\20240212-dia-lumos\ddab-enps-1h-dia-label-fee\ddab-enps-1h-DIA-Label-free	4.38723	0.000316027	0.249086	19.4736	P04080	P04080	CYTB_HUMAN	Cystatin-B
6.81055	6.81621	6.80368	6.66496	6.67333	6.70011	6.81015	6.67947	0.740148	-0.434114	+	D:\CHENYUWAN\20240212-dia-lumos\ddab-enps-1h-dia-label-fee\Blank-NPs-DIA-Label-free_D:\CHENYUWAN\20240212-dia-lumos\ddab-enps-1h-dia-label-fee\ddab-enps-1h-DIA-Label-free	3.51058	0.00125243	0.130681	11.6664	P04083	P04083	ANXA1_HUMAN	Annexin A1
6.14701	5.93972	6.03864	6.17465	6.30133	6.21588	6.04179	6.23062	1.54465	0.627282			1.25655	0.0419626	-0.18883	-2.67715	P04114	P04114;CON_IPI00711422.1	APOB_HUMAN	Apolipoprotein B-100
5.99528	5.95208	5.98039	5.96128	6.02477	5.98896	5.97591	5.99167	1.03695	0.0523492			0.284718	0.582032	-0.0157588	-0.705999	P04150	P04150	GCR_HUMAN	Glucocorticoid receptor
6.59183	6.59018	6.57552	6.59487	6.55611	6.55933	6.58584	6.57011	0.96442	-0.0522661			0.512473	0.251924	0.0157334	1.16911	P04156	P04156;X6RKS3;A2A2V1	PRIO_HUMAN	Major prion protein
7.62467	7.61432	7.62678	7.63244	7.62435	7.63084	7.62192	7.62921	1.01694	0.0242335			0.730309	0.139067	-0.00729497	-1.59438	P04179	P04179;A0A0C4DFU2;A0A0C4DFU1;G5E9P6;A0A0C4DG56;F5GXZ9;G8JLJ2;F5H4R2;F5GYZ5;F5H3C5	SODM_HUMAN	Superoxide dismutase [Mn], mitochondrial
7.19129	7.19179	7.18251	7.18942	7.18375	7.16929	7.18853	7.18082	0.982408	-0.0256054			0.502306	0.259432	0.00770791	1.1491	P04181	P04181	OAT_HUMAN	Ornithine aminotransferase, mitochondrial
6.11421	6.07616	6.09824	5.87728	5.75399	5.82102	6.0962	5.81743	0.526289	-0.926074	+	D:\CHENYUWAN\20240212-dia-lumos\ddab-enps-1h-dia-label-fee\Blank-NPs-DIA-Label-free_D:\CHENYUWAN\20240212-dia-lumos\ddab-enps-1h-dia-label-fee\ddab-enps-1h-DIA-Label-free	2.76607	0.00372226	0.278776	7.47343	P04183	P04183;K7ES52;K7ERV3;K7ENW5;K7ERJ1	KITH_HUMAN	Thymidine kinase, cytosolic
7.37361	7.37145	7.3702	7.49042	7.48266	7.49479	7.37175	7.48929	1.31081	0.390459	+	D:\CHENYUWAN\20240212-dia-lumos\ddab-enps-1h-dia-label-fee\Blank-NPs-DIA-Label-free_D:\CHENYUWAN\20240212-dia-lumos\ddab-enps-1h-dia-label-fee\ddab-enps-1h-DIA-Label-free	5.24005	0	-0.11754	-31.9036	P04264	P04259;P04264;CON_IPI00220327.3	K2C1_HUMAN	Keratin, type II cytoskeletal 1
NaN	NaN	6.30146	NaN	NaN	5.99671	6.30146	5.99671	0.495732	-1.01237			0	1	0.304753	0	P04350	P04350	TBB4A_HUMAN	Tubulin beta-4A chain
8.00836	8.0101	8.00607	8.12679	8.12251	8.14639	8.00818	8.13189	1.32959	0.410983	+	D:\CHENYUWAN\20240212-dia-lumos\ddab-enps-1h-dia-label-fee\Blank-NPs-DIA-Label-free_D:\CHENYUWAN\20240212-dia-lumos\ddab-enps-1h-dia-label-fee\ddab-enps-1h-DIA-Label-free	4.11517	0.00039633	-0.123719	-16.6238	P04406	P04406;E7EUT5;CON_IPI00713814.2	G3P_HUMAN	Glyceraldehyde-3-phosphate dehydrogenase
5.54357	5.58615	5.55582	5.57279	5.53071	5.57766	5.56185	5.56039	0.996651	-0.00484005			0.0249439	0.985548	0.0014569	0.0745089	P04626	P04626;B4DTR1;J3QLU9	ERBB2_HUMAN	Receptor tyrosine-protein kinase erbB-2
6.39127	6.42015	6.42417	6.0887	6.06927	6.16265	6.41186	6.10687	0.495463	-1.01315	+	D:\CHENYUWAN\20240212-dia-lumos\ddab-enps-1h-dia-label-fee\Blank-NPs-DIA-Label-free_D:\CHENYUWAN\20240212-dia-lumos\ddab-enps-1h-dia-label-fee\ddab-enps-1h-DIA-Label-free	3.2626	0.00208133	0.304989	10.0736	P04632	P04632;K7EMQ1;K7EKD8;K7ELJ7;A0A0C4DGQ5	CPNS1_HUMAN	Calpain small subunit 1
6.42304	NaN	6.41711	NaN	6.57817	6.56526	6.42008	6.57171	1.41788	0.503732	+	D:\CHENYUWAN\20240212-dia-lumos\ddab-enps-1h-dia-label-fee\Blank-NPs-DIA-Label-free_D:\CHENYUWAN\20240212-dia-lumos\ddab-enps-1h-dia-label-fee\ddab-enps-1h-DIA-Label-free	2.66054	0.00398588	-0.151639	-21.3579	P04637	P04637;A0A0U1RQC9;E9PCY9;J3KP33;E7EQX7;S4R334;E7EMR6;A0A087WZU8	P53_HUMAN	Cellular tumor antigen p53
7.70656	7.70194	7.70462	7.13428	7.11929	7.13556	7.70437	7.12971	0.266281	-1.90898	+	D:\CHENYUWAN\20240212-dia-lumos\ddab-enps-1h-dia-label-fee\Blank-NPs-DIA-Label-free_D:\CHENYUWAN\20240212-dia-lumos\ddab-enps-1h-dia-label-fee\ddab-enps-1h-DIA-Label-free	7.33242	0	0.57466	106.556	P04792	P04792	HSPB1_HUMAN	Heat shock protein beta-1
5.96742	5.99371	5.96832	5.75144	5.74025	5.75612	5.97648	5.74927	0.592635	-0.754784	+	D:\CHENYUWAN\20240212-dia-lumos\ddab-enps-1h-dia-label-fee\Blank-NPs-DIA-Label-free_D:\CHENYUWAN\20240212-dia-lumos\ddab-enps-1h-dia-label-fee\ddab-enps-1h-DIA-Label-free	4.68443	0.000388889	0.227213	23.1365	P04818	P04818	TYSY_HUMAN	Thymidylate synthase
8.06879	8.0607	8.06109	8.00973	8.00789	8.01648	8.06353	8.01137	0.886832	-0.173267	+	D:\CHENYUWAN\20240212-dia-lumos\ddab-enps-1h-dia-label-fee\Blank-NPs-DIA-Label-free_D:\CHENYUWAN\20240212-dia-lumos\ddab-enps-1h-dia-label-fee\ddab-enps-1h-DIA-Label-free	3.82958	0.000434018	0.052159	14.0705	P04843	P04843;F8WF32	RPN1_HUMAN	Dolichyl-diphosphooligosaccharide--protein glycosyltransferase subunit 1
7.51571	7.51729	7.51846	7.4545	7.47021	7.47145	7.51715	7.46539	0.88763	-0.17197	+	D:\CHENYUWAN\20240212-dia-lumos\ddab-enps-1h-dia-label-fee\Blank-NPs-DIA-Label-free_D:\CHENYUWAN\20240212-dia-lumos\ddab-enps-1h-dia-label-fee\ddab-enps-1h-DIA-Label-free	3.14425	0.00215891	0.0517683	9.38774	P04844	P04844;Q5JYR3	RPN2_HUMAN	Dolichyl-diphosphooligosaccharide--protein glycosyltransferase subunit 2
7.56501	7.55481	7.56072	7.55302	7.56536	7.5724	7.56018	7.56359	1.00789	0.0113344			0.206478	0.752137	-0.00341209	-0.534035	P04899	P04899	GNAI2_HUMAN	Guanine nucleotide-binding protein G(i) subunit alpha-2
6.48704	6.48191	6.4684	6.47919	6.47373	6.45594	6.47912	6.46962	0.978359	-0.0315639			0.457943	0.299312	0.00950178	1.0613	P04920	P04920	B3A2_HUMAN	Anion exchange protein 2
7.56402	7.5582	7.56425	7.54478	7.55388	7.53894	7.56216	7.54587	0.96318	-0.054122			1.56784	0.0227458	0.0162926	3.4091	P05023	P05023	AT1A1_HUMAN	Sodium/potassium-transporting ATPase subunit alpha-1
6.86974	6.88435	6.86152	6.86766	6.84122	6.86303	6.87187	6.8573	0.967015	-0.0483894			0.62166	0.186804	0.0145669	1.38259	P05026	P05026	AT1B1_HUMAN	Sodium/potassium-transporting ATPase subunit beta-1
6.47774	6.46008	6.46066	6.33589	6.31348	6.32747	6.46616	6.32561	0.723529	-0.466878	+	D:\CHENYUWAN\20240212-dia-lumos\ddab-enps-1h-dia-label-fee\Blank-NPs-DIA-Label-free_D:\CHENYUWAN\20240212-dia-lumos\ddab-enps-1h-dia-label-fee\ddab-enps-1h-DIA-Label-free	4.05984	0.000517483	0.140544	16.0963	P05067	P05067;H7C0V9;E9PG40	A4_HUMAN	Amyloid beta A4 protein
7.14335	7.13547	7.14359	7.11054	7.11816	7.1167	7.1408	7.11513	0.942611	-0.085265	+	D:\CHENYUWAN\20240212-dia-lumos\ddab-enps-1h-dia-label-fee\Blank-NPs-DIA-Label-free_D:\CHENYUWAN\20240212-dia-lumos\ddab-enps-1h-dia-label-fee\ddab-enps-1h-DIA-Label-free	2.71417	0.004	0.0256675	7.24024	P05091	O94788;P05091;F8VP50;H0YMG7;H0YKL3	ALDH2_HUMAN	Aldehyde dehydrogenase, mitochondrial
7.20351	7.2	7.20796	7.21317	7.23724	7.23376	7.20382	7.22806	1.05739	0.0805047			1.43474	0.0306849	-0.0242346	-3.08505	P05114	P05114;F2Z2Y5;F2Z2W6;H7BXJ5;A6NL93	HMGN1_HUMAN	Non-histone chromosomal protein HMG-14
8.36815	8.36443	8.37696	8.36714	8.37424	8.37289	8.36984	8.37142	1.00364	0.00524643			0.135246	0.854967	-0.00157897	-0.366712	P05141	Q9H0C2;P12235;P05141;P12236;V9GYG0	ADT2_HUMAN	ADP/ATP translocase 2
7.44064	7.43024	7.4286	6.7385	6.75548	6.74808	7.43316	6.74735	0.206154	-2.2782	+	D:\CHENYUWAN\20240212-dia-lumos\ddab-enps-1h-dia-label-fee\Blank-NPs-DIA-Label-free_D:\CHENYUWAN\20240212-dia-lumos\ddab-enps-1h-dia-label-fee\ddab-enps-1h-DIA-Label-free	7.39891	0	0.685808	110.715	P05161	P05161;A0A096LNZ9;A0A096LPJ4	ISG15_HUMAN	Ubiquitin-like protein ISG15
6.0444	6.05293	6.03996	6.08179	6.0584	6.03122	6.04577	6.05714	1.02653	0.0377736			0.306891	0.52764	-0.0113707	-0.753082	P05165	P05165;A0A1B0GWI4;A0A1B0GWA1;A0A1B0GU58;A0A1B0GUX9	PCCA_HUMAN	Propionyl-CoA carboxylase alpha chain, mitochondrial
6.49339	6.5218	6.47064	6.59045	6.5339	6.56929	6.49528	6.56455	1.17292	0.2301			1.45184	0.0297058	-0.0692671	-3.1257	P05166	P05166;C9JVY9;E7EX59;E7ENC1;E9PDR0;C9JQS9;E7ETT1;E7EUY3;E7ETT4;F8WBI9;E9PEC3	PCCB_HUMAN	Propionyl-CoA carboxylase beta chain, mitochondrial
6.28981	6.24961	6.2354	6.23366	6.28177	6.20967	6.25827	6.2417	0.962557	-0.0550554			0.244954	0.678514	0.0165733	0.619863	P05186	P05186	PPBT_HUMAN	Alkaline phosphatase, tissue-nonspecific isozyme
8.41414	8.41246	8.42344	8.41869	8.41825	8.4183	8.41668	8.41841	1.004	0.00575469			0.194529	0.769956	-0.00173219	-0.506801	P05187	P05187	PPB1_HUMAN	Alkaline phosphatase, placental type
7.15568	7.15807	7.14485	7.01307	7.01145	7.01745	7.15286	7.01399	0.726312	-0.461338	+	D:\CHENYUWAN\20240212-dia-lumos\ddab-enps-1h-dia-label-fee\Blank-NPs-DIA-Label-free_D:\CHENYUWAN\20240212-dia-lumos\ddab-enps-1h-dia-label-fee\ddab-enps-1h-DIA-Label-free	5.20377	0	0.138877	31.242	P05198	P05198;H0YJS4;G3V4T5	IF2A_HUMAN	Eukaryotic translation initiation factor 2 subunit 1
7.18704	7.1966	7.18962	7.39418	7.37527	7.33176	7.19109	7.36707	1.49964	0.584615	+	D:\CHENYUWAN\20240212-dia-lumos\ddab-enps-1h-dia-label-fee\Blank-NPs-DIA-Label-free_D:\CHENYUWAN\20240212-dia-lumos\ddab-enps-1h-dia-label-fee\ddab-enps-1h-DIA-Label-free	3.1483	0.00216732	-0.175987	-9.41046	P05204	P05204;O00479	HMGN2_HUMAN	Non-histone chromosomal protein HMG-17
6.38271	6.3934	6.37942	6.37798	6.39592	6.3664	6.38518	6.3801	0.988379	-0.0168632			0.204888	0.754246	0.00507641	0.530428	P05362	P05362;E7ESS4	ICAM1_HUMAN	Intercellular adhesion molecule 1
7.85489	7.83349	7.86628	7.61897	7.56419	7.59644	7.85155	7.5932	0.551633	-0.85822	+	D:\CHENYUWAN\20240212-dia-lumos\ddab-enps-1h-dia-label-fee\Blank-NPs-DIA-Label-free_D:\CHENYUWAN\20240212-dia-lumos\ddab-enps-1h-dia-label-fee\ddab-enps-1h-DIA-Label-free	3.80964	0.000428365	0.25835	13.9073	P05386	P05386	RLA1_HUMAN	60S acidic ribosomal protein P1
7.77797	7.78697	7.77029	7.55583	7.54007	7.54984	7.77841	7.54858	0.589078	-0.76347	+	D:\CHENYUWAN\20240212-dia-lumos\ddab-enps-1h-dia-label-fee\Blank-NPs-DIA-Label-free_D:\CHENYUWAN\20240212-dia-lumos\ddab-enps-1h-dia-label-fee\ddab-enps-1h-DIA-Label-free	5.37695	0	0.229827	34.5279	P05387	P05387	RLA2_HUMAN	60S acidic ribosomal protein P2
7.40445	7.38647	7.40293	7.20311	7.2133	7.18979	7.39795	7.20207	0.636967	-0.65071	+	D:\CHENYUWAN\20240212-dia-lumos\ddab-enps-1h-dia-label-fee\Blank-NPs-DIA-Label-free_D:\CHENYUWAN\20240212-dia-lumos\ddab-enps-1h-dia-label-fee\ddab-enps-1h-DIA-Label-free	4.59585	0.000356234	0.195883	21.979	P05388	P05388;F8W1K8;F8VWS0;F8VZS0;F8VW21	RLA0_HUMAN	60S acidic ribosomal protein P0
5.30175	5.23397	NaN	NaN	NaN	5.38938	5.26786	5.38938	1.32288	0.403681			0	0.999996	-0.12152	0	P05412	P05412	JUN_HUMAN	Transcription factor AP-1
6.13488	5.98533	6.1471	6.25579	6.10729	6.18809	6.0891	6.18372	1.24343	0.31432			0.632216	0.18143	-0.0946193	-1.40315	P05423	P05423	RPC4_HUMAN	DNA-directed RNA polymerase III subunit RPC4
7.10369	7.10112	7.10129	7.17429	7.18634	7.19055	7.10204	7.18373	1.20696	0.271377	+	D:\CHENYUWAN\20240212-dia-lumos\ddab-enps-1h-dia-label-fee\Blank-NPs-DIA-Label-free_D:\CHENYUWAN\20240212-dia-lumos\ddab-enps-1h-dia-label-fee\ddab-enps-1h-DIA-Label-free	4.10494	0.000393443	-0.0816925	-16.525	P05455	P05455;E7ERC4;E9PFL9;E9PGX9	LA_HUMAN	Lupus La protein
7.63479	7.65921	7.6032	7.61689	7.56838	7.62813	7.6324	7.60447	0.937702	-0.0927981			0.498444	0.262972	0.0279349	1.14149	P05496;P48201;Q06055	Q06055;P05496;P48201;E7EQ97;I3L0Y5;E7EPU7;D6R9H7	AT5G1_HUMAN;AT5G2_HUMAN;AT5G3_HUMAN	ATP synthase F(0) complex subunit C1, mitochondrial
5.84508	5.84867	5.79426	5.79215	5.72782	5.76688	5.82934	5.76228	0.856933	-0.222745			1.22709	0.0438329	0.067053	2.61225	P05534;P30447	P05534;P10316;P01892;P30447;A0A140T9X5;A0A140T955;A0A140T9I0;A0A140T933;A0A140T913	1A23_HUMAN;1A24_HUMAN	HLA class I histocompatibility antigen, A-24 alpha chain
6.77183	6.75748	6.74859	6.72319	6.73194	6.7101	6.7593	6.72174	0.91716	-0.124755			1.80889	0.0155636	0.0375552	4.04592	P05549	P05549;C1K3N0;Q96SH1;F8WEX2	AP2A_HUMAN	Transcription factor AP-2-alpha
7.46687	7.46739	7.46306	7.44377	7.44249	7.43578	7.46578	7.44068	0.943851	-0.0833682	+	D:\CHENYUWAN\20240212-dia-lumos\ddab-enps-1h-dia-label-fee\Blank-NPs-DIA-Label-free_D:\CHENYUWAN\20240212-dia-lumos\ddab-enps-1h-dia-label-fee\ddab-enps-1h-DIA-Label-free	3.04892	0.0022738	0.0250966	8.86707	P05556	P05556	ITB1_HUMAN	Integrin beta-1
8.48775	8.49488	8.48892	8.53743	8.54842	8.54318	8.49052	8.54301	1.12847	0.17437	+	D:\CHENYUWAN\20240212-dia-lumos\ddab-enps-1h-dia-label-fee\Blank-NPs-DIA-Label-free_D:\CHENYUWAN\20240212-dia-lumos\ddab-enps-1h-dia-label-fee\ddab-enps-1h-DIA-Label-free	3.76932	0.00041867	-0.0524906	-13.5826	P05783	P05783;F8VZY9;CON_IPI00311493.5	K1C18_HUMAN	Keratin, type I cytoskeletal 18
8.59427	8.60138	8.60294	8.6509	8.65497	8.65674	8.59953	8.6542	1.13417	0.181634	+	D:\CHENYUWAN\20240212-dia-lumos\ddab-enps-1h-dia-label-fee\Blank-NPs-DIA-Label-free_D:\CHENYUWAN\20240212-dia-lumos\ddab-enps-1h-dia-label-fee\ddab-enps-1h-DIA-Label-free	4.1737	0.00026616	-0.0546773	-17.2002	P05787	P05787;CON_IPI00554648.3;CON_IPI00787323.2	K2C8_HUMAN	Keratin, type II cytoskeletal 8
5.02683	4.88884	4.9614	5.45651	5.57566	5.50261	4.95902	5.5116	3.56921	1.83561	+	D:\CHENYUWAN\20240212-dia-lumos\ddab-enps-1h-dia-label-fee\Blank-NPs-DIA-Label-free_D:\CHENYUWAN\20240212-dia-lumos\ddab-enps-1h-dia-label-fee\ddab-enps-1h-DIA-Label-free	3.32577	0.00198704	-0.552573	-10.4587	P06132	P06132;A0A1B0GVZ4;A0A1B0GVN9;H0Y5R6	DCUP_HUMAN	Uroporphyrinogen decarboxylase
5.41745	5.37472	5.31895	5.43905	NaN	5.34638	5.37038	5.39272	1.05279	0.0742174			0.162396	0.819755	-0.0223419	-0.442596	P06213	P06213	INSR_HUMAN	Insulin receptor
6.42638	6.36751	6.3426	6.32857	6.33639	6.30633	6.37883	6.32376	0.880908	-0.182937			0.976738	0.0780102	0.0550696	2.08435	P06280	P06280;V9GYN5	AGAL_HUMAN	Alpha-galactosidase A
5.98377	5.94915	6.04439	5.74887	5.77169	5.79233	5.99244	5.77097	0.600524	-0.735706	+	D:\CHENYUWAN\20240212-dia-lumos\ddab-enps-1h-dia-label-fee\Blank-NPs-DIA-Label-free_D:\CHENYUWAN\20240212-dia-lumos\ddab-enps-1h-dia-label-fee\ddab-enps-1h-DIA-Label-free	2.71723	0.00382941	0.22147	7.25382	P06396	P06396;A0A0A0MT01;A0A0A0MS51;Q5T0I0;CON_IPI00694255.1	GELS_HUMAN	Gelsolin
6.56438	6.54856	6.57941	6.90614	6.88624	6.87391	6.56412	6.88876	2.11177	1.07845	+	D:\CHENYUWAN\20240212-dia-lumos\ddab-enps-1h-dia-label-fee\Blank-NPs-DIA-Label-free_D:\CHENYUWAN\20240212-dia-lumos\ddab-enps-1h-dia-label-fee\ddab-enps-1h-DIA-Label-free	4.82452	0.000430769	-0.324646	-25.0912	P06454	P06454;B8ZZQ6;H7C2N1;B8ZZA1;B8ZZW7	PTMA_HUMAN	Prothymosin alpha
6.98679	6.99365	6.98597	6.62793	6.64483	6.61237	6.98881	6.62838	0.436089	-1.1973	+	D:\CHENYUWAN\20240212-dia-lumos\ddab-enps-1h-dia-label-fee\Blank-NPs-DIA-Label-free_D:\CHENYUWAN\20240212-dia-lumos\ddab-enps-1h-dia-label-fee\ddab-enps-1h-DIA-Label-free	5.50684	0	0.360425	37.2157	P06493	P06493;A0A087WZZ9;A0A024QZP7	CDK1_HUMAN	Cyclin-dependent kinase 1
8.7783	8.7682	8.77978	8.76888	8.77327	8.76535	8.77543	8.76917	0.985692	-0.0207908			0.659255	0.167828	0.00625896	1.45581	P06576	P06576;H0YH81;F8W079	ATPB_HUMAN	ATP synthase subunit beta, mitochondrial
7.38703	7.39563	7.3618	7.0816	7.07008	7.08984	7.38148	7.08051	0.500062	-0.999822	+	D:\CHENYUWAN\20240212-dia-lumos\ddab-enps-1h-dia-label-fee\Blank-NPs-DIA-Label-free_D:\CHENYUWAN\20240212-dia-lumos\ddab-enps-1h-dia-label-fee\ddab-enps-1h-DIA-Label-free	4.87387	0.000457516	0.300976	25.818	P06703	P06703;R4GN98	S10A6_HUMAN	Protein S100-A6
6.33103	6.3024	6.25315	6.30467	6.29404	6.30178	6.29553	6.30016	1.01073	0.0153949			0.0706249	0.93369	-0.00463406	-0.201808	P06730	P06730;D6RBW1;H0Y8J7	IF4E_HUMAN	Eukaryotic translation initiation factor 4E
7.52149	7.50538	7.51612	7.5616	7.56753	7.56286	7.51433	7.564	1.12117	0.164999	+	D:\CHENYUWAN\20240212-dia-lumos\ddab-enps-1h-dia-label-fee\Blank-NPs-DIA-Label-free_D:\CHENYUWAN\20240212-dia-lumos\ddab-enps-1h-dia-label-fee\ddab-enps-1h-DIA-Label-free	3.21673	0.00202024	-0.0496697	-9.80245	P06733	P06733	ENOA_HUMAN	Alpha-enolase
6.4167	6.40342	6.42267	6.17279	6.20127	6.2087	6.41426	6.19425	0.602546	-0.730856	+	D:\CHENYUWAN\20240212-dia-lumos\ddab-enps-1h-dia-label-fee\Blank-NPs-DIA-Label-free_D:\CHENYUWAN\20240212-dia-lumos\ddab-enps-1h-dia-label-fee\ddab-enps-1h-DIA-Label-free	4.23633	0.000277778	0.220009	17.8386	P06737	P06737;E9PK47	PYGL_HUMAN	Glycogen phosphorylase, liver form
6.90277	6.88376	6.90433	6.97787	6.97135	6.98528	6.89695	6.97817	1.20563	0.269785	+	D:\CHENYUWAN\20240212-dia-lumos\ddab-enps-1h-dia-label-fee\Blank-NPs-DIA-Label-free_D:\CHENYUWAN\20240212-dia-lumos\ddab-enps-1h-dia-label-fee\ddab-enps-1h-DIA-Label-free	3.33154	0.0019935	-0.0812133	-10.4945	P06744	P06744;K7ENA0;A0A0J9YXP8;K7EQ48;A0A0J9YYH3;A0A0A0MTS2;A0A0J9YX90;K7EPY4	G6PI_HUMAN	Glucose-6-phosphate isomerase
6.37005	6.3861	NaN	6.39	6.46397	6.38185	6.37807	6.41194	1.0811	0.112505			0.402682	0.36042	-0.0338674	-0.988808	P06746	P06746;E7EW18;H0YBX1;H0YAV8	DPOLB_HUMAN	DNA polymerase beta
8.62258	8.59092	8.60914	8.615	8.62215	8.6213	8.60755	8.61949	1.02787	0.0396561			0.560643	0.220921	-0.0119375	-1.26356	P06748	P06748;E5RI98	NPM_HUMAN	Nucleophosmin
7.2233	7.20221	7.1874	7.20927	7.23807	7.2401	7.2043	7.22915	1.05887	0.08253			0.79671	0.11718	-0.0248437	-1.72457	P06753	P06753;D6RGJ6;J3KN67	TPM3_HUMAN	Tropomyosin alpha-3 chain
6.93022	6.91654	6.92025	6.9591	6.95223	6.95311	6.92234	6.95481	1.07764	0.107881	+	D:\CHENYUWAN\20240212-dia-lumos\ddab-enps-1h-dia-label-fee\Blank-NPs-DIA-Label-free_D:\CHENYUWAN\20240212-dia-lumos\ddab-enps-1h-dia-label-fee\ddab-enps-1h-DIA-Label-free	2.66535	0.00400568	-0.0324752	-7.02676	P06756	P06756	ITAV_HUMAN	Integrin alpha-V
5.91109	5.92793	5.94244	5.94196	6.00235	5.94499	5.92715	5.9631	1.0863	0.119419			0.764745	0.128047	-0.0359489	-1.66178	P06858	P06858	LIPL_HUMAN	Lipoprotein lipase
6.66568	6.66167	6.64655	6.63221	6.60638	6.62922	6.65796	6.6226	0.921806	-0.117466			1.61448	0.0210504	0.0353605	3.52706	P06865	P06865;H3BP20;H3BS10;H3BTD4;H3BU85	HEXA_HUMAN	Beta-hexosaminidase subunit alpha
5.70513	5.70179	5.67322	5.66436	5.64781	5.70234	5.69338	5.6715	0.950873	-0.072676			0.501758	0.259785	0.0218776	1.14802	P07093	P07093	GDN_HUMAN	Glia-derived nexin
7.47516	7.45632	7.46474	7.40144	7.41122	7.42404	7.46541	7.41224	0.884764	-0.176635	+	D:\CHENYUWAN\20240212-dia-lumos\ddab-enps-1h-dia-label-fee\Blank-NPs-DIA-Label-free_D:\CHENYUWAN\20240212-dia-lumos\ddab-enps-1h-dia-label-fee\ddab-enps-1h-DIA-Label-free	2.4745	0.00525664	0.0531724	6.24385	P07099	P07099	HYEP_HUMAN	Epoxide hydrolase 1
5.92105	5.91243	5.92924	5.69378	5.61552	5.63474	5.92091	5.64802	0.533468	-0.906528	+	D:\CHENYUWAN\20240212-dia-lumos\ddab-enps-1h-dia-label-fee\Blank-NPs-DIA-Label-free_D:\CHENYUWAN\20240212-dia-lumos\ddab-enps-1h-dia-label-fee\ddab-enps-1h-DIA-Label-free	3.46419	0.0013067	0.272892	11.3514	P07108	P07108;B8ZWD1;A0A0A0MTI5	ACBP_HUMAN	Acyl-CoA-binding protein
7.34681	7.33361	7.34943	7.3563	7.34942	7.35567	7.34328	7.3538	1.02451	0.03494			0.915564	0.0886688	-0.0105181	-1.96067	P07195	P07195;F5H793;C9J7H8;A8MW50	LDHB_HUMAN	L-lactate dehydrogenase B chain
6.62351	6.6663	6.64211	6.68552	6.66667	6.67503	6.64397	6.67574	1.07588	0.105523			1.10355	0.0580019	-0.0317656	-2.34684	P07199	P07199	CENPB_HUMAN	Major centromere autoantigen B
6.69916	6.71017	6.68574	6.68229	6.69555	6.68954	6.69835	6.68912	0.978971	-0.0306625			0.501956	0.25969	0.0092303	1.14841	P07203	P07203;A0A087WUQ6	GPX1_HUMAN	Glutathione peroxidase 1
5.1262	5.1829	5.16895	4.9375	4.78285	4.85058	5.15935	4.85698	0.498455	-1.00446	+	D:\CHENYUWAN\20240212-dia-lumos\ddab-enps-1h-dia-label-fee\Blank-NPs-DIA-Label-free_D:\CHENYUWAN\20240212-dia-lumos\ddab-enps-1h-dia-label-fee\ddab-enps-1h-DIA-Label-free	2.49214	0.0052115	0.302374	6.31291	P07204	P07204	TRBM_HUMAN	Thrombomodulin
6.2347	6.23879	6.2341	6.20818	6.27317	6.18798	6.23586	6.22311	0.971064	-0.0423623			0.18956	0.777333	0.0127527	0.495385	P07225	P07225;G5E9F8	PROS_HUMAN	Vitamin K-dependent protein S
7.80105	7.79828	7.79909	7.69884	7.69278	7.69777	7.79947	7.69646	0.788841	-0.342193	+	D:\CHENYUWAN\20240212-dia-lumos\ddab-enps-1h-dia-label-fee\Blank-NPs-DIA-Label-free_D:\CHENYUWAN\20240212-dia-lumos\ddab-enps-1h-dia-label-fee\ddab-enps-1h-DIA-Label-free	6.03749	0	0.10301	50.5389	P07237	P07237;I3L3U6;I3L398;I3L312;H7BZ94	PDIA1_HUMAN	Protein disulfide-isomerase
7.63614	7.63708	7.64254	7.65537	7.66401	7.65837	7.63859	7.65925	1.04874	0.0686543	+	D:\CHENYUWAN\20240212-dia-lumos\ddab-enps-1h-dia-label-fee\Blank-NPs-DIA-Label-free_D:\CHENYUWAN\20240212-dia-lumos\ddab-enps-1h-dia-label-fee\ddab-enps-1h-DIA-Label-free	2.51732	0.00523316	-0.0206668	-6.41266	P07305	P07305	H10_HUMAN	Histone H1.0
7.36085	7.35799	7.3582	7.29962	7.29968	7.30413	7.35901	7.30114	0.87525	-0.192233	+	D:\CHENYUWAN\20240212-dia-lumos\ddab-enps-1h-dia-label-fee\Blank-NPs-DIA-Label-free_D:\CHENYUWAN\20240212-dia-lumos\ddab-enps-1h-dia-label-fee\ddab-enps-1h-DIA-Label-free	5.29903	0	0.057868	33.0089	P07339	P07339;A0A1B0GV23;A0A1B0GVP3;H7C469;H7C1V0;A0A1B0GW44;A0A1B0GVD5;A0A1B0GWE8	CATD_HUMAN	Cathepsin D
8.0783	8.07784	8.07328	7.957	7.95215	7.95627	8.07647	7.95514	0.756246	-0.403073	+	D:\CHENYUWAN\20240212-dia-lumos\ddab-enps-1h-dia-label-fee\Blank-NPs-DIA-Label-free_D:\CHENYUWAN\20240212-dia-lumos\ddab-enps-1h-dia-label-fee\ddab-enps-1h-DIA-Label-free	6.189	0	0.121337	55.1507	P07355	P07355;A6NMY6;H0YMD0;H0YMU9;H0YN42;H0YNP5;H0YN28;H0YL33;H0YM50	ANXA2_HUMAN	Annexin A2
6.07734	6.09595	6.0839	5.71093	5.74505	5.62975	6.08573	5.69525	0.406927	-1.29716	+	D:\CHENYUWAN\20240212-dia-lumos\ddab-enps-1h-dia-label-fee\Blank-NPs-DIA-Label-free_D:\CHENYUWAN\20240212-dia-lumos\ddab-enps-1h-dia-label-fee\ddab-enps-1h-DIA-Label-free	3.45295	0.001383	0.390483	11.2763	P07384	P07384	CAN1_HUMAN	Calpain-1 catalytic subunit
8.23247	8.22586	8.23202	7.71157	7.70999	7.68739	8.23012	7.70299	0.297075	-1.7511	+	D:\CHENYUWAN\20240212-dia-lumos\ddab-enps-1h-dia-label-fee\Blank-NPs-DIA-Label-free_D:\CHENYUWAN\20240212-dia-lumos\ddab-enps-1h-dia-label-fee\ddab-enps-1h-DIA-Label-free	6.47685	0	0.527135	65.0997	P07437	P68371;P07437;P04350;Q5ST81;Q5JP53	TBB5_HUMAN	Tubulin beta chain
5.86713	5.92874	5.908	6.02115	5.9875	6.07956	5.90129	6.0294	1.34312	0.425583			1.77494	0.0162819	-0.128113	-3.95197	P07477;Q9BYE2	Q9BYE2;P07477;A6XGL3;E7EQ64;E9PRA0;J3KQC6;CON_Trypsin;CON_IPI00011694.1;CON_TRY1_BOVIN	TMPSD_HUMAN;TRY1_HUMAN	Trypsin-1
7.71812	7.71223	7.71701	7.68852	7.68448	7.69106	7.71579	7.68802	0.938062	-0.0922444	+	D:\CHENYUWAN\20240212-dia-lumos\ddab-enps-1h-dia-label-fee\Blank-NPs-DIA-Label-free_D:\CHENYUWAN\20240212-dia-lumos\ddab-enps-1h-dia-label-fee\ddab-enps-1h-DIA-Label-free	3.3391	0.00165246	0.0277683	10.5417	P07602	P07602;C9JIZ6;Q5BJH1	SAP_HUMAN	Prosaposin
6.72873	6.74509	6.74764	6.74728	6.74584	6.75028	6.74049	6.7478	1.01697	0.0242811			0.530521	0.239278	-0.00730912	-1.20457	P07686	P07686;Q5URX0	HEXB_HUMAN	Beta-hexosaminidase subunit beta
6.53413	6.54519	6.53095	6.38041	6.37462	6.38785	6.53676	6.38096	0.698557	-0.51755	+	D:\CHENYUWAN\20240212-dia-lumos\ddab-enps-1h-dia-label-fee\Blank-NPs-DIA-Label-free_D:\CHENYUWAN\20240212-dia-lumos\ddab-enps-1h-dia-label-fee\ddab-enps-1h-DIA-Label-free	4.95102	0.000492958	0.155798	26.9962	P07711	P07711;Q5T8F0	CATL1_HUMAN	Cathepsin L1
7.4503	7.43856	7.45657	7.11704	7.11237	7.11894	7.44848	7.11612	0.465204	-1.10407	+	D:\CHENYUWAN\20240212-dia-lumos\ddab-enps-1h-dia-label-fee\Blank-NPs-DIA-Label-free_D:\CHENYUWAN\20240212-dia-lumos\ddab-enps-1h-dia-label-fee\ddab-enps-1h-DIA-Label-free	6.3077	0	0.332357	59.0548	P07737	P07737;K7EJ44;CON_IPI00694107.2	PROF1_HUMAN	Profilin-1
6.48368	6.44852	6.49387	6.28594	6.28678	6.24059	6.47536	6.2711	0.624805	-0.678523	+	D:\CHENYUWAN\20240212-dia-lumos\ddab-enps-1h-dia-label-fee\Blank-NPs-DIA-Label-free_D:\CHENYUWAN\20240212-dia-lumos\ddab-enps-1h-dia-label-fee\ddab-enps-1h-DIA-Label-free	3.24176	0.00204928	0.204255	9.94957	P07741	P07741;H3BQZ9	APT_HUMAN	Adenine phosphoribosyltransferase
7.34434	7.33964	7.33539	7.09836	7.0963	7.08849	7.33979	7.09438	0.568324	-0.815213	+	D:\CHENYUWAN\20240212-dia-lumos\ddab-enps-1h-dia-label-fee\Blank-NPs-DIA-Label-free_D:\CHENYUWAN\20240212-dia-lumos\ddab-enps-1h-dia-label-fee\ddab-enps-1h-DIA-Label-free	6.38974	0	0.245404	61.9133	P07814	P07814	SYEP_HUMAN	Bifunctional glutamate/proline--tRNA ligase
6.943	6.94125	6.92874	6.93067	6.92939	6.94985	6.93766	6.93664	0.997636	-0.00341494			0.0438574	0.964617	0.00102806	0.128512	P07858	P07858;E9PNL5;E9PR54;E9PJ67;E9PHZ5;E9PS78;E9PKQ7;E9PCB3;E9PSG5;E9PLY3;E9PQM1	CATB_HUMAN	Cathepsin B
7.62693	7.60921	7.62122	7.49635	7.49533	7.49091	7.61912	7.4942	0.750027	-0.414985	+	D:\CHENYUWAN\20240212-dia-lumos\ddab-enps-1h-dia-label-fee\Blank-NPs-DIA-Label-free_D:\CHENYUWAN\20240212-dia-lumos\ddab-enps-1h-dia-label-fee\ddab-enps-1h-DIA-Label-free	4.65744	0.000377358	0.124923	22.7776	P07900	P07900	HS90A_HUMAN	Heat shock protein HSP 90-alpha
8.71727	8.70745	8.71081	8.72262	8.73164	8.72175	8.71184	8.72534	1.03156	0.0448272			1.46395	0.0288939	-0.0134945	-3.15466	P07910	P07910;B2R5W2;B4DY08;G3V576;G3V4C1;G3V2Q1;G3V4W0;G3V575;G3V2D6;G3V5V7;G3V555	HNRPC_HUMAN	Heterogeneous nuclear ribonucleoproteins C1/C2
7.15564	7.16115	7.17159	7.11343	7.11955	7.13727	7.16279	7.12342	0.91332	-0.130808			2.00212	0.0105731	0.0393769	4.61057	P07919	P07919	QCR6_HUMAN	Cytochrome b-c1 complex subunit 6, mitochondrial
6.66754	6.65969	6.66341	6.60597	6.58626	6.5958	6.66355	6.59601	0.855976	-0.224357	+	D:\CHENYUWAN\20240212-dia-lumos\ddab-enps-1h-dia-label-fee\Blank-NPs-DIA-Label-free_D:\CHENYUWAN\20240212-dia-lumos\ddab-enps-1h-dia-label-fee\ddab-enps-1h-DIA-Label-free	3.41517	0.00148975	0.0675379	11.0273	P07942	P07942;G3XAI2;E7EPA6	LAMB1_HUMAN	Laminin subunit beta-1
7.07596	7.06035	7.07497	7.04819	7.07019	7.04652	7.07043	7.05497	0.965024	-0.0513637			0.779565	0.122945	0.0154619	1.69086	P07947	P06241;P12931;P07947;J3QRU1	YES_HUMAN	Tyrosine-protein kinase Yes
6.04631	6.05	6.05798	6.05369	5.99604	6.03062	6.05143	6.02678	0.944818	-0.0818911			0.651846	0.171212	0.0246518	1.44138	P07948	P08631;P07948;J3KPD6;H0Y3C5	LYN_HUMAN	Tyrosine-protein kinase Lyn
5.89502	5.86439	5.86073	5.80933	5.7872	5.83021	5.87338	5.80891	0.862051	-0.214155			1.75807	0.0167706	0.064467	3.90581	P07951	P07951;Q5TCU8;Q5TCU3;CON_IPI00703268.2	TPM2_HUMAN	Tropomyosin beta chain
7.37801	7.37426	7.38329	7.38028	7.40539	7.38983	7.37852	7.39183	1.03112	0.0442149			0.790498	0.119481	-0.0133098	-1.71235	P07954	P07954	FUMH_HUMAN	Fumarate hydratase, mitochondrial
4.89638	NaN	NaN	4.78443	5.04	5.09181	4.89638	4.97208	1.19043	0.25148			0	0.999815	-0.0757035	0	P07992	P07992;K7ES46	ERCC1_HUMAN	DNA excision repair protein ERCC-1
6.58871	6.60202	6.58551	6.45256	6.45291	6.46038	6.59208	6.45529	0.729802	-0.454423	+	D:\CHENYUWAN\20240212-dia-lumos\ddab-enps-1h-dia-label-fee\Blank-NPs-DIA-Label-free_D:\CHENYUWAN\20240212-dia-lumos\ddab-enps-1h-dia-label-fee\ddab-enps-1h-DIA-Label-free	4.75914	0.000411765	0.136795	24.1594	P07996	P07996	TSP1_HUMAN	Thrombospondin-1
6.5088	6.56652	6.57667	6.54926	6.45848	6.53879	6.55067	6.51551	0.922242	-0.116782			0.420718	0.337506	0.0351551	0.986901	P08047	P08047	SP1_HUMAN	Transcription factor Sp1
6.07182	5.90102	6.02938	5.97289	5.93383	5.9713	6.00074	5.95934	0.909084	-0.137515			0.320868	0.493006	0.041396	0.782458	P08069	P08069;C9J5X1	IGF1R_HUMAN	Insulin-like growth factor 1 receptor
5.68757	5.21338	NaN	5.0907	5.44205	NaN	5.45048	5.26638	0.654485	-0.611567			0.224477	0.719256	0.1841	0.623881	P08123	P08123;A0A087WTA8	CO1A2_HUMAN	Collagen alpha-2(I) chain
6.4621	6.44049	6.44787	6.24646	6.26443	6.22092	6.45015	6.24394	0.621991	-0.685035	+	D:\CHENYUWAN\20240212-dia-lumos\ddab-enps-1h-dia-label-fee\Blank-NPs-DIA-Label-free_D:\CHENYUWAN\20240212-dia-lumos\ddab-enps-1h-dia-label-fee\ddab-enps-1h-DIA-Label-free	3.89238	0.000453988	0.206216	14.597	P08133	P08133	ANXA6_HUMAN	Annexin A6
5.62861	5.71158	5.73042	5.636	5.66967	5.63434	5.6902	5.64667	0.904623	-0.144611			0.582505	0.207352	0.0435324	1.30626	P08134	P08134;Q5JR08;E9PQH6	RHOC_HUMAN	Rho-related GTP-binding protein RhoC
7.81045	7.8117	7.81144	7.78555	7.7916	7.7942	7.8112	7.79045	0.953353	-0.0689178	+	D:\CHENYUWAN\20240212-dia-lumos\ddab-enps-1h-dia-label-fee\Blank-NPs-DIA-Label-free_D:\CHENYUWAN\20240212-dia-lumos\ddab-enps-1h-dia-label-fee\ddab-enps-1h-DIA-Label-free	2.881	0.00304947	0.0207461	8.01382	P08174	P08174;B1AP13;H3BLV0;H7BY55	DAF_HUMAN	Complement decay-accelerating factor
5.84976	5.85166	5.85572	5.83261	5.89782	5.86707	5.85238	5.86583	1.03146	0.0446821			0.287086	0.575904	-0.0134506	-0.711059	P08183	P08183;P21439	MDR1_HUMAN	Multidrug resistance protein 1
8.38439	8.37608	8.38433	8.37025	8.38381	8.37477	8.3816	8.37628	0.987822	-0.0176771			0.475913	0.283479	0.00532118	1.09696	P08195	P08195;J3KPF3;H0YFS2;F5H867;F5GZS6	4F2_HUMAN	4F2 cell-surface antigen heavy chain
6.57806	6.58665	6.57227	6.49027	6.48147	6.47845	6.57899	6.4834	0.802425	-0.317561	+	D:\CHENYUWAN\20240212-dia-lumos\ddab-enps-1h-dia-label-fee\Blank-NPs-DIA-Label-free_D:\CHENYUWAN\20240212-dia-lumos\ddab-enps-1h-dia-label-fee\ddab-enps-1h-DIA-Label-free	4.19877	0.00027027	0.0955954	17.453	P08236	P08236	BGLR_HUMAN	Beta-glucuronidase
6.04888	6.0809	6.04542	5.95325	5.93705	5.91326	6.0584	5.93452	0.751824	-0.411534	+	D:\CHENYUWAN\20240212-dia-lumos\ddab-enps-1h-dia-label-fee\Blank-NPs-DIA-Label-free_D:\CHENYUWAN\20240212-dia-lumos\ddab-enps-1h-dia-label-fee\ddab-enps-1h-DIA-Label-free	2.80394	0.00327216	0.123884	7.64778	P08237	P08237;F8VP00	PFKAM_HUMAN	ATP-dependent 6-phosphofructokinase, muscle type
8.12244	8.11976	8.12134	7.94796	7.93623	7.93961	8.12118	7.94127	0.660831	-0.597646	+	D:\CHENYUWAN\20240212-dia-lumos\ddab-enps-1h-dia-label-fee\Blank-NPs-DIA-Label-free_D:\CHENYUWAN\20240212-dia-lumos\ddab-enps-1h-dia-label-fee\ddab-enps-1h-DIA-Label-free	6.03153	0	0.179909	50.3658	P08238	Q58FF8;Q14568;P08238;P07900	HS90B_HUMAN	Heat shock protein HSP 90-beta
6.82552	6.8264	6.83888	6.79756	6.80418	6.78838	6.83027	6.79671	0.925647	-0.111466	+	D:\CHENYUWAN\20240212-dia-lumos\ddab-enps-1h-dia-label-fee\Blank-NPs-DIA-Label-free_D:\CHENYUWAN\20240212-dia-lumos\ddab-enps-1h-dia-label-fee\ddab-enps-1h-DIA-Label-free	2.22491	0.00719298	0.0335549	5.33183	P08240	P08240	SRPRA_HUMAN	Signal recognition particle receptor subunit alpha
6.64623	6.65165	6.62672	6.52141	6.54956	6.55933	6.64154	6.54343	0.797804	-0.325894	+	D:\CHENYUWAN\20240212-dia-lumos\ddab-enps-1h-dia-label-fee\Blank-NPs-DIA-Label-free_D:\CHENYUWAN\20240212-dia-lumos\ddab-enps-1h-dia-label-fee\ddab-enps-1h-DIA-Label-free	2.70118	0.00396798	0.0981038	7.18292	P08243	P08243;C9JM09;F8WEJ5;C9JT45;C9J057	ASNS_HUMAN	Asparagine synthetase [glutamine-hydrolyzing]
7.54641	7.5401	7.53896	7.57293	7.58649	7.57435	7.54182	7.57792	1.08668	0.119927	+	D:\CHENYUWAN\20240212-dia-lumos\ddab-enps-1h-dia-label-fee\Blank-NPs-DIA-Label-free_D:\CHENYUWAN\20240212-dia-lumos\ddab-enps-1h-dia-label-fee\ddab-enps-1h-DIA-Label-free	2.74751	0.00373731	-0.0361018	-7.38931	P08559	P08559;P29803;Q5JPU3	ODPA_HUMAN	Pyruvate dehydrogenase E1 component subunit alpha, somatic form, mitochondrial
6.70132	6.72143	6.70378	6.63033	6.59357	6.62455	6.70884	6.61615	0.807802	-0.307926	+	D:\CHENYUWAN\20240212-dia-lumos\ddab-enps-1h-dia-label-fee\Blank-NPs-DIA-Label-free_D:\CHENYUWAN\20240212-dia-lumos\ddab-enps-1h-dia-label-fee\ddab-enps-1h-DIA-Label-free	2.68262	0.00404878	0.0926948	7.10163	P08572	P08572	CO4A2_HUMAN	Collagen alpha-2(IV) chain
7.505	7.49775	7.49253	7.50985	7.51121	7.49912	7.49843	7.50673	1.01931	0.0275897			0.721709	0.142313	-0.00830507	-1.57758	P08574	P08574	CY1_HUMAN	Cytochrome c1, heme protein, mitochondrial
6.9432	6.96878	6.96201	6.99751	7.01201	6.988	6.958	6.99917	1.09944	0.136774			1.78319	0.0161924	-0.0411731	-3.97465	P08579	P08579	RU2B_HUMAN	U2 small nuclear ribonucleoprotein B''
6.59689	6.60319	6.60259	6.60059	6.61624	6.62835	6.60089	6.61506	1.03317	0.047075			0.789636	0.119833	-0.0141714	-1.71065	P08581	P08581	MET_HUMAN	Hepatocyte growth factor receptor
7.65144	7.65272	7.64026	7.67246	7.67411	7.67161	7.64814	7.67273	1.05825	0.0816762	+	D:\CHENYUWAN\20240212-dia-lumos\ddab-enps-1h-dia-label-fee\Blank-NPs-DIA-Label-free_D:\CHENYUWAN\20240212-dia-lumos\ddab-enps-1h-dia-label-fee\ddab-enps-1h-DIA-Label-free	2.4395	0.00539864	-0.024587	-6.10869	P08621	P08621	RU17_HUMAN	U1 small nuclear ribonucleoprotein 70 kDa
6.59029	6.57856	6.6014	6.61478	6.6129	6.6077	6.59008	6.61179	1.05127	0.0721335			1.45606	0.0293244	-0.0217142	-3.13578	P08648	P08648	ITA5_HUMAN	Integrin alpha-5
6.85147	6.86735	6.88236	6.89764	6.87474	6.904	6.86706	6.89212	1.05941	0.0832652			0.930733	0.0851613	-0.0250657	-1.99118	P08651	P08651	NFIC_HUMAN	Nuclear factor 1 C-type
8.75202	8.7556	8.75296	8.76723	8.76308	8.7732	8.75353	8.76784	1.03351	0.0475456			1.99095	0.0107157	-0.0143124	-4.57649	P08670	P08670;B0YJC4	VIME_HUMAN	Vimentin
7.65714	7.64318	7.65328	7.40233	7.41261	7.38865	7.6512	7.4012	0.562334	-0.8305	+	D:\CHENYUWAN\20240212-dia-lumos\ddab-enps-1h-dia-label-fee\Blank-NPs-DIA-Label-free_D:\CHENYUWAN\20240212-dia-lumos\ddab-enps-1h-dia-label-fee\ddab-enps-1h-DIA-Label-free	5.18417	0	0.250006	30.8904	P08708	P08708;H0YN88;H0YN73;A0A075B716	RS17_HUMAN	40S ribosomal protein S17
8.81115	8.81562	8.81768	8.80643	8.80295	8.80406	8.81482	8.80448	0.976475	-0.0343443	+	D:\CHENYUWAN\20240212-dia-lumos\ddab-enps-1h-dia-label-fee\Blank-NPs-DIA-Label-free_D:\CHENYUWAN\20240212-dia-lumos\ddab-enps-1h-dia-label-fee\ddab-enps-1h-DIA-Label-free	2.04206	0.00974751	0.0103385	4.73403	P08729	P08729;CON_IPI00306959.10;CON_IPI00847342.1	K2C7_HUMAN	Keratin, type II cytoskeletal 7
6.97669	6.98559	6.97197	6.97069	6.92971	6.95048	6.97808	6.95029	0.938018	-0.092312			1.04541	0.0672823	0.0277891	2.22538	P08754	P08754	GNAI3_HUMAN	Guanine nucleotide-binding protein G(k) subunit alpha
6.94797	6.9394	6.93788	6.98218	6.97978	6.9935	6.94175	6.98515	1.10511	0.144196	+	D:\CHENYUWAN\20240212-dia-lumos\ddab-enps-1h-dia-label-fee\Blank-NPs-DIA-Label-free_D:\CHENYUWAN\20240212-dia-lumos\ddab-enps-1h-dia-label-fee\ddab-enps-1h-DIA-Label-free	2.92639	0.0028538	-0.0434074	-8.23678	P08758	P08758;D6RBE9;D6RBL5	ANXA5_HUMAN	Annexin A5
6.44285	6.44832	6.4457	6.43492	6.41798	6.38664	6.44562	6.41318	0.928019	-0.107774			1.0717	0.0633674	0.0324434	2.28006	P08779	P08779;K7ENW6;CON_IPI00217963.3	K1C16_HUMAN	Keratin, type I cytoskeletal 16
6.38692	6.41584	6.42874	6.36359	6.37541	6.39069	6.4105	6.37656	0.924831	-0.112738			1.08961	0.0607607	0.0339376	2.31753	P08842	P08842	STS_HUMAN	Steryl-sulfatase
7.60646	7.61134	7.59811	7.32716	7.34639	7.33254	7.6053	7.33536	0.537104	-0.896726	+	D:\CHENYUWAN\20240212-dia-lumos\ddab-enps-1h-dia-label-fee\Blank-NPs-DIA-Label-free_D:\CHENYUWAN\20240212-dia-lumos\ddab-enps-1h-dia-label-fee\ddab-enps-1h-DIA-Label-free	5.59127	0	0.269941	39.0735	P08865	P08865;A0A0C4DG17;C9J9K3	RSSA_HUMAN	40S ribosomal protein SA
7.49122	7.48402	7.47504	7.4491	7.44107	7.49286	7.48342	7.46101	0.949693	-0.0744666			0.598552	0.198914	0.0224164	1.33756	P08962	P08962;F8VV56;F8VNT9;F8VWK8;F8W022	CD63_HUMAN	CD63 antigen
6.81926	6.79996	6.80533	6.90284	6.90149	6.87908	6.80818	6.89447	1.21978	0.286623	+	D:\CHENYUWAN\20240212-dia-lumos\ddab-enps-1h-dia-label-fee\Blank-NPs-DIA-Label-free_D:\CHENYUWAN\20240212-dia-lumos\ddab-enps-1h-dia-label-fee\ddab-enps-1h-DIA-Label-free	3.06927	0.00231152	-0.0862821	-8.9759	P09001	P09001;E9PF06;E7ETU7;H0Y9G6	RM03_HUMAN	39S ribosomal protein L3, mitochondrial
7.21499	7.22946	7.23424	7.23975	7.24803	7.25221	7.22623	7.24666	1.04818	0.0678836			1.39177	0.0334855	-0.0204349	-2.98414	P09012	P09012;M0QZG7;M0R2B8;M0R268;M0R221;M0QXK2	SNRPA_HUMAN	U1 small nuclear ribonucleoprotein A
6.85507	6.84135	6.83562	6.83332	6.84733	6.85094	6.84402	6.84386	0.999649	-0.00050604			0.00632883	1	0.000152111	0.0192908	P09038	P09038;A0A087WUF6	FGF2_HUMAN	Fibroblast growth factor 2
6.57873	6.57202	6.52119	6.58013	6.56131	6.57853	6.55731	6.57332	1.03756	0.0532007			0.347	0.441366	-0.0160149	-0.836811	P09110	P09110;C9JDE9;H7C131;H0Y4D4	THIK_HUMAN	3-ketoacyl-CoA thiolase, peroxisomal
6.10694	6.08904	6.10202	5.81274	5.8528	5.86287	6.09933	5.8428	0.553951	-0.852169	+	D:\CHENYUWAN\20240212-dia-lumos\ddab-enps-1h-dia-label-fee\Blank-NPs-DIA-Label-free_D:\CHENYUWAN\20240212-dia-lumos\ddab-enps-1h-dia-label-fee\ddab-enps-1h-DIA-Label-free	4.03043	0.000506849	0.256529	15.8225	P09132	P09132;A0A087WYR0	SRP19_HUMAN	Signal recognition particle 19 kDa protein
6.95854	6.9493	6.94013	6.66961	6.66998	6.69211	6.94933	6.67724	0.534454	-0.903861	+	D:\CHENYUWAN\20240212-dia-lumos\ddab-enps-1h-dia-label-fee\Blank-NPs-DIA-Label-free_D:\CHENYUWAN\20240212-dia-lumos\ddab-enps-1h-dia-label-fee\ddab-enps-1h-DIA-Label-free	5.11965	0.000571429	0.272089	29.7602	P09211	P09211	GSTP1_HUMAN	Glutathione S-transferase P
7.19562	7.20131	7.17823	7.23027	7.22108	7.21394	7.19172	7.22176	1.07163	0.0998051			1.63386	0.0203352	-0.0300449	-3.57676	P09234	P09234;A0A0A0MRR7	RU1C_HUMAN	U1 small nuclear ribonucleoprotein C
7.96761	7.97752	7.9762	7.86663	7.8688	7.8849	7.97378	7.87345	0.793724	-0.333291	+	D:\CHENYUWAN\20240212-dia-lumos\ddab-enps-1h-dia-label-fee\Blank-NPs-DIA-Label-free_D:\CHENYUWAN\20240212-dia-lumos\ddab-enps-1h-dia-label-fee\ddab-enps-1h-DIA-Label-free	3.97558	0.000484452	0.100331	15.3242	P09382	P09382;F8WEI7	LEG1_HUMAN	Galectin-1
5.97784	5.97188	5.89657	5.9914	5.9751	6.01351	5.94876	5.99334	1.10809	0.148074			0.716933	0.144547	-0.0445749	-1.56826	P09417	P09417;B7Z415;D6RHJ7;D6RGG7	DHPR_HUMAN	Dihydropteridine reductase
6.80062	6.82792	6.82167	7.04695	7.05595	7.05534	6.81674	7.05275	1.72191	0.784009	+	D:\CHENYUWAN\20240212-dia-lumos\ddab-enps-1h-dia-label-fee\Blank-NPs-DIA-Label-free_D:\CHENYUWAN\20240212-dia-lumos\ddab-enps-1h-dia-label-fee\ddab-enps-1h-DIA-Label-free	4.9488	0.000487805	-0.236011	-26.9616	P09429	P09429;Q5T7C4	HMGB1_HUMAN	High mobility group protein B1
6.89787	6.88063	6.91049	6.90607	6.89795	6.90311	6.89633	6.90238	1.01403	0.0200932			0.269924	0.620157	-0.00604852	-0.674226	P09493	P09493;H0YL52;A0A087WTJ7;H0YKZ6;H0YKP3	TPM1_HUMAN	Tropomyosin alpha-1 chain
7.40323	7.414	7.42587	7.40163	7.40984	7.40655	7.41437	7.40601	0.980934	-0.0277724			0.529014	0.240255	0.00836023	1.20161	P09496	P09496;F8WF69	CLCA_HUMAN	Clathrin light chain A
7.08679	7.09823	7.08318	7.06546	7.05767	7.07057	7.0894	7.06457	0.944428	-0.0824868			1.8703	0.0136779	0.0248305	4.21973	P09497	P09497	CLCB_HUMAN	Clathrin light chain B
6.03277	6.14879	6.23646	6.12982	6.09189	5.99968	6.13934	6.0738	0.859915	-0.217734			0.392249	0.374366	0.0655443	0.929431	P09525	P09525;Q6P452	ANXA4_HUMAN	Annexin A4
7.11094	7.09884	7.09819	7.06675	7.06926	7.06521	7.10266	7.06707	0.921336	-0.118201	+	D:\CHENYUWAN\20240212-dia-lumos\ddab-enps-1h-dia-label-fee\Blank-NPs-DIA-Label-free_D:\CHENYUWAN\20240212-dia-lumos\ddab-enps-1h-dia-label-fee\ddab-enps-1h-DIA-Label-free	2.93067	0.00285858	0.0355819	8.25808	P09543	P09543	CN37_HUMAN	2',3'-cyclic-nucleotide 3'-phosphodiesterase
6.66004	6.6326	6.63758	6.36776	6.32533	6.35233	6.64341	6.34847	0.50707	-0.979742	+	D:\CHENYUWAN\20240212-dia-lumos\ddab-enps-1h-dia-label-fee\Blank-NPs-DIA-Label-free_D:\CHENYUWAN\20240212-dia-lumos\ddab-enps-1h-dia-label-fee\ddab-enps-1h-DIA-Label-free	4.40385	0.000319635	0.294932	19.6624	P09601	P09601;B1AHA8	HMOX1_HUMAN	Heme oxygenase 1
7.18785	7.1929	7.18264	7.19088	7.20275	7.19958	7.1878	7.19774	1.02315	0.0330222			1.00878	0.0724554	-0.00994015	-2.14985	P09622	P09622;E9PEX6	DLDH_HUMAN	Dihydrolipoyl dehydrogenase, mitochondrial
8.54065	8.51829	8.53695	8.55269	8.55176	8.54954	8.53196	8.55133	1.0456	0.0643302			1.2998	0.0392562	-0.0193653	-2.77367	P09651	P09651;F8W6I7;F8VTQ5;F8VZ49;H0YH80	ROA1_HUMAN	Heterogeneous nuclear ribonucleoprotein A1
7.49245	7.49811	7.51727	7.56231	7.55597	7.56078	7.50261	7.55969	1.14046	0.189615	+	D:\CHENYUWAN\20240212-dia-lumos\ddab-enps-1h-dia-label-fee\Blank-NPs-DIA-Label-free_D:\CHENYUWAN\20240212-dia-lumos\ddab-enps-1h-dia-label-fee\ddab-enps-1h-DIA-Label-free	2.74201	0.00382414	-0.0570792	-7.36453	P09661	P09661;H0YKK0	RU2A_HUMAN	U2 small nuclear ribonucleoprotein A'
7.45553	7.45792	7.43961	7.46267	7.46979	7.48612	7.45102	7.47286	1.05158	0.0725653			1.13999	0.0532436	-0.0218447	-2.42406	P09669	P09669	COX6C_HUMAN	Cytochrome c oxidase subunit 6C
6.22288	6.16947	6.22453	6.06729	6.20713	6.26214	6.20563	6.17885	0.940213	-0.0889402			0.166083	0.814899	0.0267731	0.440688	P09758	P09758	TACD2_HUMAN	Tumor-associated calcium signal transducer 2
7.61878	7.61614	7.61707	7.67234	7.67128	7.675	7.61733	7.67287	1.13644	0.18452	+	D:\CHENYUWAN\20240212-dia-lumos\ddab-enps-1h-dia-label-fee\Blank-NPs-DIA-Label-free_D:\CHENYUWAN\20240212-dia-lumos\ddab-enps-1h-dia-label-fee\ddab-enps-1h-DIA-Label-free	5.68272	0	-0.055546	-41.1901	P09874	P09874	PARP1_HUMAN	Poly [ADP-ribose] polymerase 1
5.93247	5.85474	5.8706	5.97845	5.97875	6.00142	5.88594	5.98621	1.25971	0.333088			1.80187	0.0156721	-0.100269	-4.02636	P09884	P09884;A0A087WU64;A6NMQ1	DPOLA_HUMAN	DNA polymerase alpha catalytic subunit
6.91788	6.92904	6.91833	6.41251	6.46986	6.47144	6.92175	6.45127	0.338471	-1.56289	+	D:\CHENYUWAN\20240212-dia-lumos\ddab-enps-1h-dia-label-fee\Blank-NPs-DIA-Label-free_D:\CHENYUWAN\20240212-dia-lumos\ddab-enps-1h-dia-label-fee\ddab-enps-1h-DIA-Label-free	4.7368	0.000402299	0.470478	23.8489	P09913	P09913;A0A087X279	IFIT2_HUMAN	Interferon-induced protein with tetratricopeptide repeats 2
6.03036	6.08436	6.03483	5.42715	5.43408	NaN	6.04985	5.43061	0.240305	-2.05706	+	D:\CHENYUWAN\20240212-dia-lumos\ddab-enps-1h-dia-label-fee\Blank-NPs-DIA-Label-free_D:\CHENYUWAN\20240212-dia-lumos\ddab-enps-1h-dia-label-fee\ddab-enps-1h-DIA-Label-free	3.97834	0.000486842	0.619236	27.537	P09914	P09914	IFIT1_HUMAN	Interferon-induced protein with tetratricopeptide repeats 1
7.50875	7.50325	7.48937	7.49515	7.48276	7.50006	7.50046	7.49265	0.982189	-0.0259276			0.432168	0.324591	0.00780519	1.00987	P09923	P09923	PPBI_HUMAN	Intestinal-type alkaline phosphatase
6.36449	6.39352	6.34491	6.21401	6.19601	6.20204	6.36764	6.20402	0.686092	-0.543526	+	D:\CHENYUWAN\20240212-dia-lumos\ddab-enps-1h-dia-label-fee\Blank-NPs-DIA-Label-free_D:\CHENYUWAN\20240212-dia-lumos\ddab-enps-1h-dia-label-fee\ddab-enps-1h-DIA-Label-free	3.38766	0.00169697	0.163618	10.8493	P09960	P09960	LKHA4_HUMAN	Leukotriene A-4 hydrolase
6.33997	6.38074	6.37486	6.27194	6.28892	6.27213	6.36519	6.27766	0.817472	-0.290758	+	D:\CHENYUWAN\20240212-dia-lumos\ddab-enps-1h-dia-label-fee\Blank-NPs-DIA-Label-free_D:\CHENYUWAN\20240212-dia-lumos\ddab-enps-1h-dia-label-fee\ddab-enps-1h-DIA-Label-free	2.48676	0.00523253	0.087527	6.29179	P09972	P09972;J3KSV6;J3QKP5;C9J8F3;A8MVZ9;K7EKH5	ALDOC_HUMAN	Fructose-bisphosphate aldolase C
7.5954	7.60456	7.58389	7.65102	7.6016	7.60515	7.59462	7.61925	1.05837	0.0818423			0.655836	0.169348	-0.0246371	-1.44915	P0C0S5;Q71UI9	Q71UI9;P0C0S5;C9J0D1	H2AV_HUMAN;H2AZ_HUMAN	Histone H2A.Z
5.5584	5.61978	5.51314	5.45761	5.37664	5.18887	5.56377	5.34104	0.598775	-0.739913			1.22548	0.0439533	0.222736	2.60872	P0C2W1	P0C2W1;C9JLC0	FBSP1_HUMAN	F-box/SPRY domain-containing protein 1
5.83807	5.73261	NaN	NaN	4.94544	NaN	5.78533	4.94544	0.144579	-2.79007			0	0.999634	0.839896	0	P0DI83	P0DI83;A0A1B0GVI6;A0A1B0GWB1;A8MYQ9;A0A1B0GTQ2	NARR_HUMAN	Ras-related protein Rab-34, isoform NARR
5.73207	5.7791	5.80263	5.72219	5.77605	5.72663	5.77127	5.74162	0.93402	-0.0984741			0.476715	0.282725	0.0296435	1.09855	P0DJ93	P0DJ93	SIM13_HUMAN	Small integral membrane protein 13
5.94776	5.90067	5.87283	5.89436	5.88612	5.91444	5.90709	5.89831	0.979991	-0.0291599			0.13851	0.851688	0.0087781	0.374668	P0DMU7;P0DMU8;P0DMU9;P0DMV0;P0DMV1;P0DMV2;Q5DJT8;Q5HYN5;Q8NHU0	Q5DJT8;P0DMV1;P0DMV0;Q5HYN5;P0DMU7;P0DMU9;Q8NHU0;P0DMV2;P0DMU8	CT451_HUMAN;CT452_HUMAN;CT453_HUMAN;CT455_HUMAN;CT456_HUMAN;CT457_HUMAN;CT458_HUMAN;CT459_HUMAN;CT45A_HUMAN	Cancer/testis antigen family 45 member A6
8.148	8.13962	8.14552	7.80273	7.79319	7.80563	8.14438	7.80052	0.453041	-1.14229	+	D:\CHENYUWAN\20240212-dia-lumos\ddab-enps-1h-dia-label-fee\Blank-NPs-DIA-Label-free_D:\CHENYUWAN\20240212-dia-lumos\ddab-enps-1h-dia-label-fee\ddab-enps-1h-DIA-Label-free	6.75334	0	0.343862	76.3393	P0DMV8;P0DMV9	P34931;P0DMV9;P0DMV8;Q53FA3;A0A0G2JIW1;V9GZ37	HS71A_HUMAN;HS71B_HUMAN	Heat shock 70 kDa protein 1A
7.37915	7.3679	7.37751	7.35293	7.36975	7.39053	7.37485	7.37107	0.991317	-0.0125812			0.120938	0.872186	0.00378704	0.331453	P0DN76;Q01081	P0DN76;Q01081	U2AF1_HUMAN;U2AF5_HUMAN	Splicing factor U2AF 35 kDa subunit-like protein
5.77618	5.74201	5.74442	5.63821	5.58269	5.62712	5.7542	5.61601	0.727455	-0.459071	+	D:\CHENYUWAN\20240212-dia-lumos\ddab-enps-1h-dia-label-fee\Blank-NPs-DIA-Label-free_D:\CHENYUWAN\20240212-dia-lumos\ddab-enps-1h-dia-label-fee\ddab-enps-1h-DIA-Label-free	2.62014	0.00414866	0.138194	6.83402	P0DN79;P35520	P0DN79;P35520	CBSL_HUMAN;CBS_HUMAN	Cystathionine beta-synthase-like protein
5.58213	NaN	5.56934	5.60983	NaN	NaN	5.57573	5.60983	1.08167	0.113266			0	0.999453	-0.0340967	0	P10072	P10072;Q7Z6E1;F5H6A5;K7EPW3	HKR1_HUMAN	Krueppel-related zinc finger protein 1
6.66378	6.68573	6.70145	6.72	6.7077	6.7001	6.68365	6.70927	1.06075	0.085089			0.970214	0.0791185	-0.0256143	-2.07108	P10109	P10109	ADX_HUMAN	Adrenodoxin, mitochondrial
4.90968	4.87149	4.84289	4.99502	5.03744	4.96797	4.87469	5.00014	1.33493	0.416762			1.96013	0.0114432	-0.125458	-4.48337	P10114	P10114	RAP2A_HUMAN	Ras-related protein Rap-2a
6.689	6.71153	6.68972	6.75754	6.74756	6.78011	6.69675	6.76174	1.16141	0.215872	+	D:\CHENYUWAN\20240212-dia-lumos\ddab-enps-1h-dia-label-fee\Blank-NPs-DIA-Label-free_D:\CHENYUWAN\20240212-dia-lumos\ddab-enps-1h-dia-label-fee\ddab-enps-1h-DIA-Label-free	2.23139	0.00715292	-0.064984	-5.35407	P10155	P10155	RO60_HUMAN	60 kDa SS-A/Ro ribonucleoprotein
5.81512	5.95922	5.96662	5.97763	5.89964	5.90671	5.91365	5.92799	1.03357	0.0476353			0.0925837	0.908626	-0.0143398	-0.259568	P10163	Q04118;P10163;E7EXA8;E9PAL0;F5H7C1;A0A0G2JNB4;A0A0G2JPB4;A0A0G2JPD0	PRB4_HUMAN	Basic salivary proline-rich protein 4
6.15369	6.19601	6.18152	6.10707	6.14813	6.15584	6.17707	6.13702	0.911892	-0.133065			0.957821	0.080845	0.0400569	2.04592	P10253	P10253	LYAG_HUMAN	Lysosomal alpha-glucosidase
6.26396	6.30282	6.32318	6.35788	6.34432	6.30251	6.29665	6.3349	1.09207	0.127067			0.727614	0.140466	-0.0382504	-1.58912	P10301	P10301	RRAS_HUMAN	Ras-related protein R-Ras
5.99028	5.97589	5.99277	5.87554	5.80299	5.81016	5.98631	5.82956	0.697031	-0.520704	+	D:\CHENYUWAN\20240212-dia-lumos\ddab-enps-1h-dia-label-fee\Blank-NPs-DIA-Label-free_D:\CHENYUWAN\20240212-dia-lumos\ddab-enps-1h-dia-label-fee\ddab-enps-1h-DIA-Label-free	2.56905	0.0048369	0.156748	6.62175	P10398	P10398;Q96II5	ARAF_HUMAN	Serine/threonine-protein kinase A-Raf
7.48665	7.44004	7.23507	6.74834	7.0599	7.64187	7.38725	7.15004	0.579144	-0.788007			0.362571	0.414643	0.237213	0.868881	P10412	P16402;P10412	H14_HUMAN	Histone H1.4
5.50977	5.54731	5.47415	5.57279	5.46153	5.53426	5.51041	5.52286	1.02909	0.0413646			0.116519	0.878292	-0.012452	-0.320432	P10415	P10415	BCL2_HUMAN	Apoptosis regulator Bcl-2
7.32656	7.32314	7.33043	7.32309	7.3316	7.33683	7.32671	7.33051	1.00878	0.0126145			0.348155	0.439782	-0.00379753	-0.839198	P10515	P10515;E9PEJ4;H0YDD4	ODP2_HUMAN	Dihydrolipoyllysine-residue acetyltransferase component of pyruvate dehydrogenase complex, mitochondrial
6.60256	6.59262	6.57667	6.55988	6.56067	6.5545	6.59062	6.55835	0.928398	-0.107185			1.8438	0.0147241	0.0322661	4.14411	P10586	P23468;P10586;F5GWR7;Q3KPI9;A2A437	PTPRF_HUMAN	Receptor-type tyrosine-protein phosphatase F
5.74859	5.65723	5.72806	5.79335	5.71091	5.73296	5.71129	5.74574	1.08254	0.114426			0.3923	0.37432	-0.0344458	-0.929535	P10588	P10588;M0R175	NR2F6_HUMAN	Nuclear receptor subfamily 2 group F member 6
6.59981	6.53941	6.59842	6.59895	6.5365	6.54322	6.57921	6.55955	0.955749	-0.0652969			0.282	0.589385	0.019656	0.700186	P10589	P10589;P24468;F1DAL9	COT1_HUMAN	COUP transcription factor 1
7.06738	7.07669	7.07786	6.73029	6.73692	6.72045	7.07398	6.72922	0.452108	-1.14526	+	D:\CHENYUWAN\20240212-dia-lumos\ddab-enps-1h-dia-label-fee\Blank-NPs-DIA-Label-free_D:\CHENYUWAN\20240212-dia-lumos\ddab-enps-1h-dia-label-fee\ddab-enps-1h-DIA-Label-free	6.31259	0	0.344758	59.2215	P10599	P10599	THIO_HUMAN	Thioredoxin
7.52132	7.52708	7.51031	7.51469	7.50339	7.50297	7.51957	7.50702	0.971509	-0.0417002			0.940912	0.0827496	0.0125531	2.01171	P10606	P10606	COX5B_HUMAN	Cytochrome c oxidase subunit 5B, mitochondrial
6.39616	6.38515	6.37492	6.38664	6.38069	6.33782	6.38541	6.36838	0.961552	-0.0565636			0.441492	0.31509	0.0170274	1.02851	P10619	P10619;X6R8A1;X6R5C5	PPGB_HUMAN	Lysosomal protective protein
7.19114	7.19151	7.1618	7.15452	7.17435	7.20539	7.18149	7.17809	0.99221	-0.0112824			0.0666231	0.937745	0.00339651	0.191063	P10620	P10620;F5H7F6;F5H6X2	MGST1_HUMAN	Microsomal glutathione S-transferase 1
6.74294	6.77208	6.75228	NaN	6.10617	NaN	6.75577	6.10617	0.224082	-2.1579			0	0.999272	0.649593	0	P10636	P10636;A0A0G2JPD5;A0A0G2JMX7;A0A0G2JQJ7;I3L170;A0A0G2JS76	TAU_HUMAN	Microtubule-associated protein tau
6.259	6.27006	6.26396	5.74094	5.74679	5.78359	6.26434	5.75711	0.311004	-1.68499	+	D:\CHENYUWAN\20240212-dia-lumos\ddab-enps-1h-dia-label-fee\Blank-NPs-DIA-Label-free_D:\CHENYUWAN\20240212-dia-lumos\ddab-enps-1h-dia-label-fee\ddab-enps-1h-DIA-Label-free	5.49451	0	0.507234	36.9519	P10644	P10644;K7EPB2;K7EM13	KAP0_HUMAN	cAMP-dependent protein kinase type I-alpha regulatory subunit
5.333	5.37578	5.2633	5.52239	5.45443	5.42891	5.32402	5.46858	1.39493	0.480196			1.54748	0.0235798	-0.144554	-3.35836	P10646	P10646;C9JQ14;C9JT76;C9JBB3;C9JKV3	TFPI1_HUMAN	Tissue factor pathway inhibitor
5.96159	5.79488	5.86153	5.8135	5.8515	6.02979	5.87267	5.89826	1.0607	0.0850137			0.112568	0.884024	-0.0255914	-0.310524	P10768	P10768;X6RA14;H7BZT7;U3KQT1	ESTD_HUMAN	S-formylglutathione hydrolase
8.42866	8.44892	8.43309	8.42253	8.41569	8.41657	8.43689	8.41826	0.958015	-0.0618798			1.33747	0.0362741	0.0186281	2.85901	P10809	P10809	CH60_HUMAN	60 kDa heat shock protein, mitochondrial
6.31006	6.33117	6.32135	6.19476	6.1817	6.20513	6.32086	6.19386	0.746452	-0.421878	+	D:\CHENYUWAN\20240212-dia-lumos\ddab-enps-1h-dia-label-fee\Blank-NPs-DIA-Label-free_D:\CHENYUWAN\20240212-dia-lumos\ddab-enps-1h-dia-label-fee\ddab-enps-1h-DIA-Label-free	3.81231	0.000430233	0.126998	13.929	P10909	P10909;E5RJZ5;E7ERK6;E7ETB4;H0YLK8	CLUS_HUMAN	Clusterin
8.42075	8.42878	8.41608	8.27965	8.26751	8.29121	8.42187	8.27945	0.720418	-0.473095	+	D:\CHENYUWAN\20240212-dia-lumos\ddab-enps-1h-dia-label-fee\Blank-NPs-DIA-Label-free_D:\CHENYUWAN\20240212-dia-lumos\ddab-enps-1h-dia-label-fee\ddab-enps-1h-DIA-Label-free	4.28019	0.000288066	0.142416	18.2994	P11021	P11021	GRP78_HUMAN	78 kDa glucose-regulated protein
6.51554	6.52796	6.51618	6.42227	6.41038	6.39313	6.51989	6.40859	0.773925	-0.369734	+	D:\CHENYUWAN\20240212-dia-lumos\ddab-enps-1h-dia-label-fee\Blank-NPs-DIA-Label-free_D:\CHENYUWAN\20240212-dia-lumos\ddab-enps-1h-dia-label-fee\ddab-enps-1h-DIA-Label-free	3.54087	0.00085254	0.111301	11.8766	P11047	P11047	LAMC1_HUMAN	Laminin subunit gamma-1
6.99029	6.96861	6.97476	6.97149	6.98514	6.95823	6.97789	6.97162	0.985672	-0.0208207			0.245341	0.678132	0.00626802	0.620714	P11117	P11117;B7Z7D2;E9PQY3	PPAL_HUMAN	Lysosomal acid phosphatase
8.30644	8.30579	8.30687	8.21211	8.21373	8.22248	8.30637	8.21611	0.812342	-0.299842	+	D:\CHENYUWAN\20240212-dia-lumos\ddab-enps-1h-dia-label-fee\Blank-NPs-DIA-Label-free_D:\CHENYUWAN\20240212-dia-lumos\ddab-enps-1h-dia-label-fee\ddab-enps-1h-DIA-Label-free	5.00687	0.000518519	0.0902615	27.8822	P11142	P11142;A8K7Q2;E9PKE3;E9PNE6;E9PM13;E9PS65	HSP7C_HUMAN	Heat shock cognate 71 kDa protein
7.24542	7.21288	7.22793	7.15992	7.16932	7.18358	7.22874	7.17094	0.87538	-0.192019	+	D:\CHENYUWAN\20240212-dia-lumos\ddab-enps-1h-dia-label-fee\Blank-NPs-DIA-Label-free_D:\CHENYUWAN\20240212-dia-lumos\ddab-enps-1h-dia-label-fee\ddab-enps-1h-DIA-Label-free	2.11411	0.00885433	0.0578028	4.96305	P11166	P11166	GTR1_HUMAN	Solute carrier family 2, facilitated glucose transporter member 1
6.67414	6.67368	6.67519	6.66559	6.6251	6.66298	6.67434	6.65122	0.948164	-0.0767908			0.817761	0.112302	0.0231166	1.76605	P11169;Q8TDB8	Q8TDB8;P11169	GTR14_HUMAN;GTR3_HUMAN	Solute carrier family 2, facilitated glucose transporter member 3
6.30015	6.27793	6.27848	6.22754	6.16437	6.23982	6.28552	6.21058	0.841501	-0.248963			1.42422	0.0314107	0.0749461	3.06019	P11171	P11171;Q9H4G0;Q9Y2J2;A8K968;A0A0C4DH22;Q4VB86;A0A0A0MRA8;Q4VXN1;A0A1B0GWG0;A0A1B0GTF8;Q4VXN0	41_HUMAN	Protein 4.1
6.05917	6.06656	6.042	6.05601	5.95831	6.07071	6.05591	6.02835	0.938506	-0.0915623			0.312708	0.512865	0.0275633	0.765336	P11172	P11172;E9PFD2	UMPS_HUMAN	Uridine 5'-monophosphate synthase
7.40354	7.38741	7.40273	7.40665	7.41255	7.39183	7.39789	7.40367	1.0134	0.0192074			0.288645	0.572396	-0.00578181	-0.714386	P11177	P11177;F8WF02;C9J634	ODPB_HUMAN	Pyruvate dehydrogenase E1 component subunit beta, mitochondrial
6.38025	6.36803	6.38086	6.37984	6.34009	6.34979	6.37638	6.35658	0.955427	-0.0657819			0.714022	0.145678	0.0198024	1.56257	P11182	P11182	ODB2_HUMAN	Lipoamide acyltransferase component of branched-chain alpha-keto acid dehydrogenase complex, mitochondrial
5.97379	6.00682	5.96943	5.71258	5.71548	5.7069	5.98335	5.71165	0.534941	-0.902548	+	D:\CHENYUWAN\20240212-dia-lumos\ddab-enps-1h-dia-label-fee\Blank-NPs-DIA-Label-free_D:\CHENYUWAN\20240212-dia-lumos\ddab-enps-1h-dia-label-fee\ddab-enps-1h-DIA-Label-free	4.63703	0.00037037	0.271694	22.5099	P11216	P11216	PYGB_HUMAN	Glycogen phosphorylase, brain form
7.34442	7.35489	7.33912	7.37813	7.33242	7.34491	7.34614	7.35182	1.01316	0.0188586			0.146527	0.840817	-0.00567738	-0.394078	P11233	P11233;H7C3P7	RALA_HUMAN	Ras-related protein Ral-A
6.13122	6.17623	6.21914	6.25792	6.21824	6.12491	6.17553	6.20035	1.05883	0.0824702			0.204462	0.755225	-0.0248257	-0.52946	P11234	P11234;C9J6B1;C9JQB3	RALB_HUMAN	Ras-related protein Ral-B
NaN	5.19808	NaN	4.90222	NaN	4.97604	5.19808	4.93913	0.550863	-0.860235			0	0.999091	0.258957	0	P11277	P11277;H0YJE6	SPTB1_HUMAN	Spectrin beta chain, erythrocytic
7.84284	7.84035	7.84087	7.83252	7.82923	7.83129	7.84135	7.83101	0.976484	-0.0343321	+	D:\CHENYUWAN\20240212-dia-lumos\ddab-enps-1h-dia-label-fee\Blank-NPs-DIA-Label-free_D:\CHENYUWAN\20240212-dia-lumos\ddab-enps-1h-dia-label-fee\ddab-enps-1h-DIA-Label-free	2.9698	0.00264366	0.010335	8.4552	P11279	P11279	LAMP1_HUMAN	Lysosome-associated membrane glycoprotein 1
7.11963	7.11581	7.11432	7.13045	7.13789	7.12894	7.11658	7.13243	1.03715	0.0526249	+	D:\CHENYUWAN\20240212-dia-lumos\ddab-enps-1h-dia-label-fee\Blank-NPs-DIA-Label-free_D:\CHENYUWAN\20240212-dia-lumos\ddab-enps-1h-dia-label-fee\ddab-enps-1h-DIA-Label-free	2.11604	0.00883117	-0.0158415	-4.9693	P11310	P11310;B7Z9I1;Q5T4U5;H0YDT5	ACADM_HUMAN	Medium-chain specific acyl-CoA dehydrogenase, mitochondrial
7.52885	7.52698	7.52962	7.54029	7.53302	7.55212	7.52848	7.54181	1.03117	0.0442758			1.11523	0.0563827	-0.0133284	-2.3715	P11387	P11387	TOP1_HUMAN	DNA topoisomerase 1
7.16465	7.16199	7.1555	7.10633	7.10433	7.10803	7.16071	7.10623	0.882095	-0.180994	+	D:\CHENYUWAN\20240212-dia-lumos\ddab-enps-1h-dia-label-fee\Blank-NPs-DIA-Label-free_D:\CHENYUWAN\20240212-dia-lumos\ddab-enps-1h-dia-label-fee\ddab-enps-1h-DIA-Label-free	4.31364	0.000295983	0.0544845	18.6586	P11388	P11388	TOP2A_HUMAN	DNA topoisomerase 2-alpha
6.52531	6.54082	6.55073	6.308	6.28429	6.29316	6.53896	6.29515	0.570417	-0.809912	+	D:\CHENYUWAN\20240212-dia-lumos\ddab-enps-1h-dia-label-fee\Blank-NPs-DIA-Label-free_D:\CHENYUWAN\20240212-dia-lumos\ddab-enps-1h-dia-label-fee\ddab-enps-1h-DIA-Label-free	4.75339	0.000409357	0.243808	24.0791	P11413	P11413	G6PD_HUMAN	Glucose-6-phosphate 1-dehydrogenase
6.17953	6.21132	6.21385	5.95182	5.92532	6.04531	6.20157	5.97415	0.592357	-0.755462	+	D:\CHENYUWAN\20240212-dia-lumos\ddab-enps-1h-dia-label-fee\Blank-NPs-DIA-Label-free_D:\CHENYUWAN\20240212-dia-lumos\ddab-enps-1h-dia-label-fee\ddab-enps-1h-DIA-Label-free	2.4055	0.00584112	0.227417	5.97973	P11441	P11441;Q5HY81	UBL4A_HUMAN	Ubiquitin-like protein 4A
6.0086	6.02073	6.01659	6.01686	6.04263	6.03927	6.0153	6.03292	1.0414	0.0585202			0.932006	0.0848422	-0.0176161	-1.99375	P11474	O95718;P11474;E7EWD9;H0YGT3	ERR1_HUMAN	Steroid hormone receptor ERR1
7.35904	7.35709	7.36071	7.36166	7.37282	7.36901	7.35895	7.36783	1.02067	0.0295131			1.21497	0.0447114	-0.00888427	-2.58572	P11498	P11498	PYC_HUMAN	Pyruvate carboxylase, mitochondrial
6.34664	6.35362	6.3517	6.26807	6.25432	6.27285	6.35065	6.26508	0.821159	-0.284266	+	D:\CHENYUWAN\20240212-dia-lumos\ddab-enps-1h-dia-label-fee\Blank-NPs-DIA-Label-free_D:\CHENYUWAN\20240212-dia-lumos\ddab-enps-1h-dia-label-fee\ddab-enps-1h-DIA-Label-free	3.8721	0.000449165	0.0855726	14.425	P11532	P11532;A0A087WTU7;A0A075B6G3;E7EQS5;F5GZY3;E7ESB2;A0A087WV90;E9PDN5;E7EQR9;F8VX32;H0Y304	DMD_HUMAN	Dystrophin
6.89395	6.90102	6.88631	6.73251	6.72731	6.72967	6.89376	6.72983	0.685601	-0.544559	+	D:\CHENYUWAN\20240212-dia-lumos\ddab-enps-1h-dia-label-fee\Blank-NPs-DIA-Label-free_D:\CHENYUWAN\20240212-dia-lumos\ddab-enps-1h-dia-label-fee\ddab-enps-1h-DIA-Label-free	5.46815	0	0.163929	36.394	P11586	P11586;F5H2F4	C1TC_HUMAN	C-1-tetrahydrofolate synthase, cytoplasmic
6.9164	6.93079	6.9186	6.88494	6.87707	6.88127	6.92193	6.88109	0.910263	-0.135645	+	D:\CHENYUWAN\20240212-dia-lumos\ddab-enps-1h-dia-label-fee\Blank-NPs-DIA-Label-free_D:\CHENYUWAN\20240212-dia-lumos\ddab-enps-1h-dia-label-fee\ddab-enps-1h-DIA-Label-free	2.90567	0.00287974	0.0408333	8.13432	P11717	P11717	MPRI_HUMAN	Cation-independent mannose-6-phosphate receptor
6.06942	6.10841	6.10441	6.14003	6.1182	6.24008	6.09408	6.1661	1.18039	0.239263			0.846437	0.104888	-0.0720251	-1.82277	P11766	P11766;H0YAG8	ADHX_HUMAN	Alcohol dehydrogenase class-3
5.94025	5.99418	5.95946	5.55567	5.53714	5.40799	5.96463	5.50026	0.343267	-1.54259	+	D:\CHENYUWAN\20240212-dia-lumos\ddab-enps-1h-dia-label-fee\Blank-NPs-DIA-Label-free_D:\CHENYUWAN\20240212-dia-lumos\ddab-enps-1h-dia-label-fee\ddab-enps-1h-DIA-Label-free	3.15822	0.00217791	0.464368	9.4664	P11908	P11908;P21108;P60891;B7ZB02;A0A0B4J207;H7C540;B1ALA9	PRPS2_HUMAN	Ribose-phosphate pyrophosphokinase 2
7.75525	7.74344	7.7558	7.55717	7.55539	7.551	7.7515	7.55452	0.635362	-0.654349	+	D:\CHENYUWAN\20240212-dia-lumos\ddab-enps-1h-dia-label-fee\Blank-NPs-DIA-Label-free_D:\CHENYUWAN\20240212-dia-lumos\ddab-enps-1h-dia-label-fee\ddab-enps-1h-DIA-Label-free	5.81585	0	0.196979	44.4769	P11940	Q4VXU2;P11940;E7EQV3;H0YAP2;A0A087WTT1;E7ERJ7;H0YAR2	PABP1_HUMAN	Polyadenylate-binding protein 1
7.50022	7.49289	7.48761	7.62196	7.63547	7.62533	7.49357	7.62759	1.3615	0.445196	+	D:\CHENYUWAN\20240212-dia-lumos\ddab-enps-1h-dia-label-fee\Blank-NPs-DIA-Label-free_D:\CHENYUWAN\20240212-dia-lumos\ddab-enps-1h-dia-label-fee\ddab-enps-1h-DIA-Label-free	4.78492	0.000422961	-0.134017	-24.5226	P12004	P12004	PCNA_HUMAN	Proliferating cell nuclear antigen
6.61663	NaN	6.66017	6.64111	6.68735	6.67899	6.6384	6.66915	1.07337	0.102153			0.5252	0.242849	-0.0307508	-1.25482	P12035	P12035;CON_IPI00290857.2	K2C3_HUMAN	Keratin, type II cytoskeletal 3
6.76333	6.74946	NaN	NaN	NaN	6.44219	6.7564	6.44219	0.485057	-1.04377			0	0.998911	0.314207	0	P12074	P12074;H0YIV9	CX6A1_HUMAN	Cytochrome c oxidase subunit 6A1, mitochondrial
5.61555	5.62324	5.7377	NaN	NaN	5.74714	5.65883	5.74714	1.22547	0.293337			0	0.99873	-0.0883034	0	P12109	P12109;A0A087X0S5	CO6A1_HUMAN	Collagen alpha-1(VI) chain
NaN	6.24827	6.22763	6.24231	6.3434	6.2933	6.23795	6.293	1.13515	0.182882			0.606265	0.195174	-0.0550529	-1.43186	P12111	P12111;E7ENL6	CO6A3_HUMAN	Collagen alpha-3(VI) chain
7.16645	7.16735	7.15672	7.17961	7.16758	7.1597	7.16351	7.16896	1.01263	0.0181123			0.335082	0.463021	-0.00545263	-0.812108	P12235	P12235;V9GYG0	ADT1_HUMAN	ADP/ATP translocase 1
7.62308	7.62536	7.63189	7.64313	7.64752	7.61217	7.62678	7.63427	1.01741	0.0248945			0.261216	0.640146	-0.00749365	-0.655376	P12236	P12235;P12236;V9GYG0	ADT3_HUMAN	ADP/ATP translocase 3
6.25448	6.23459	6.19334	6.67671	6.63448	6.68413	6.22747	6.66511	2.73928	1.4538	+	D:\CHENYUWAN\20240212-dia-lumos\ddab-enps-1h-dia-label-fee\Blank-NPs-DIA-Label-free_D:\CHENYUWAN\20240212-dia-lumos\ddab-enps-1h-dia-label-fee\ddab-enps-1h-DIA-Label-free	4.29354	0.00028866	-0.437637	-18.442	P12259	P12259;A0A0A0MRJ7;CON_IPI00691533.1	FA5_HUMAN	Coagulation factor V
7.36023	7.3603	7.35802	7.19509	7.1895	7.21503	7.35951	7.19987	0.692403	-0.530317	+	D:\CHENYUWAN\20240212-dia-lumos\ddab-enps-1h-dia-label-fee\Blank-NPs-DIA-Label-free_D:\CHENYUWAN\20240212-dia-lumos\ddab-enps-1h-dia-label-fee\ddab-enps-1h-DIA-Label-free	4.47659	0.000334928	0.159641	20.5103	P12268	P12268;H0Y4R1	IMDH2_HUMAN	Inosine-5'-monophosphate dehydrogenase 2
7.12357	7.12272	7.11892	7.12319	7.11963	7.12048	7.12174	7.1211	0.998537	-0.00211275			0.130835	0.859091	0.000635783	0.355909	P12270	P12270	TPR_HUMAN	Nucleoprotein TPR
7.31033	7.29571	7.30203	7.05982	7.06392	7.05053	7.30269	7.05809	0.56938	-0.812536	+	D:\CHENYUWAN\20240212-dia-lumos\ddab-enps-1h-dia-label-fee\Blank-NPs-DIA-Label-free_D:\CHENYUWAN\20240212-dia-lumos\ddab-enps-1h-dia-label-fee\ddab-enps-1h-DIA-Label-free	5.7245	0	0.244598	42.1945	P12277	P12277;G3V4N7;G3V461	KCRB_HUMAN	Creatine kinase B-type
6.58228	6.59489	6.59761	6.5991	6.60387	6.59557	6.59159	6.59951	1.01841	0.0263141			0.679285	0.158807	-0.00792154	-1.49483	P12429	P12429;D6RA82;D6RFJ9	ANXA3_HUMAN	Annexin A3
6.3499	6.38452	6.30502	6.06179	6.08896	6.11838	6.34648	6.08971	0.553641	-0.852978	+	D:\CHENYUWAN\20240212-dia-lumos\ddab-enps-1h-dia-label-fee\Blank-NPs-DIA-Label-free_D:\CHENYUWAN\20240212-dia-lumos\ddab-enps-1h-dia-label-fee\ddab-enps-1h-DIA-Label-free	3.09177	0.00221931	0.256772	9.09771	P12532;P17540	P17540;P12532	KCRS_HUMAN;KCRU_HUMAN	Creatine kinase U-type, mitochondrial
6.24111	6.25989	6.24481	6.28298	6.27907	6.20231	6.2486	6.25479	1.01434	0.0205417			0.0812504	0.921541	-0.00618347	-0.230003	P12694	P12694;F5H5P2	ODBA_HUMAN	2-oxoisovalerate dehydrogenase subunit alpha, mitochondrial
7.54895	7.54189	7.55404	7.52156	7.53225	7.537	7.54829	7.53027	0.959354	-0.0598645			1.45088	0.0296837	0.0180209	3.12342	P12814	P12814;H9KV75	ACTN1_HUMAN	Alpha-actinin-1
7.55593	7.56047	7.55852	7.66529	7.65335	7.66381	7.55831	7.66082	1.26622	0.340533	+	D:\CHENYUWAN\20240212-dia-lumos\ddab-enps-1h-dia-label-fee\Blank-NPs-DIA-Label-free_D:\CHENYUWAN\20240212-dia-lumos\ddab-enps-1h-dia-label-fee\ddab-enps-1h-DIA-Label-free	4.8697	0.000454545	-0.102511	-25.7557	P12956	P12956;B1AHC9	XRCC6_HUMAN	X-ray repair cross-complementing protein 6
7.66732	7.65429	7.66397	7.75561	7.76767	7.75325	7.66186	7.75884	1.25022	0.322179	+	D:\CHENYUWAN\20240212-dia-lumos\ddab-enps-1h-dia-label-fee\Blank-NPs-DIA-Label-free_D:\CHENYUWAN\20240212-dia-lumos\ddab-enps-1h-dia-label-fee\ddab-enps-1h-DIA-Label-free	4.08641	0.000387097	-0.0969857	-16.3475	P13010	P13010	XRCC5_HUMAN	X-ray repair cross-complementing protein 5
5.45147	5.08255	5.37589	5.41415	5.65477	5.61707	5.3033	5.562	1.81425	0.859373			0.892948	0.0936271	-0.258697	-1.91536	P13051	P13051	UNG_HUMAN	Uracil-DNA glycosylase
7.6	7.59893	7.59706	7.58712	7.58823	7.59133	7.59866	7.58889	0.977764	-0.0324419	+	D:\CHENYUWAN\20240212-dia-lumos\ddab-enps-1h-dia-label-fee\Blank-NPs-DIA-Label-free_D:\CHENYUWAN\20240212-dia-lumos\ddab-enps-1h-dia-label-fee\ddab-enps-1h-DIA-Label-free	2.51595	0.00522639	0.00976562	6.4072	P13073	P13073	COX41_HUMAN	Cytochrome c oxidase subunit 4 isoform 1, mitochondrial
6.53949	6.53292	6.52666	6.49276	6.52982	6.47845	6.53302	6.50034	0.927514	-0.10856			0.972159	0.078673	0.0326796	2.07503	P13284	P13284	GILT_HUMAN	Gamma-interferon-inducible lysosomal thiol reductase
7.94049	7.93669	7.94055	7.9331	7.92466	7.89597	7.93924	7.91791	0.952055	-0.0708833			0.878549	0.0972827	0.0213381	1.88661	P13473	P13473;H0YCG2	LAMP2_HUMAN	Lysosome-associated membrane glycoprotein 2
7.04821	7.03986	7.03679	6.8111	6.78243	6.80315	7.04162	6.7989	0.571843	-0.806309	+	D:\CHENYUWAN\20240212-dia-lumos\ddab-enps-1h-dia-label-fee\Blank-NPs-DIA-Label-free_D:\CHENYUWAN\20240212-dia-lumos\ddab-enps-1h-dia-label-fee\ddab-enps-1h-DIA-Label-free	4.91092	0.000469799	0.242723	26.3773	P13489	P13489;E9PMA9;E9PMI1;E9PMJ3;E9PLZ3;E9PR82;E9PIM9;E9PIK5;E9PMN0	RINI_HUMAN	Ribonuclease inhibitor
5.42738	5.4429	5.45836	5.54958	5.48117	5.50687	5.44288	5.51254	1.17397	0.231398			1.47701	0.027856	-0.0696575	-3.18604	P13498	P13498;H3BR52;H3BPX1;H3BNP7	CY24A_HUMAN	Cytochrome b-245 light chain
6.35049	6.36354	6.30067	6.46949	6.5486	6.50241	6.33823	6.50683	1.47435	0.560075	+	D:\CHENYUWAN\20240212-dia-lumos\ddab-enps-1h-dia-label-fee\Blank-NPs-DIA-Label-free_D:\CHENYUWAN\20240212-dia-lumos\ddab-enps-1h-dia-label-fee\ddab-enps-1h-DIA-Label-free	2.31322	0.00639123	-0.168599	-5.64111	P13501	P13501;A0A075B7C5	CCL5_HUMAN	C-C motif chemokine 5
7.44226	7.44149	7.45411	7.17222	7.17241	7.16128	7.44595	7.16864	0.528061	-0.921224	+	D:\CHENYUWAN\20240212-dia-lumos\ddab-enps-1h-dia-label-fee\Blank-NPs-DIA-Label-free_D:\CHENYUWAN\20240212-dia-lumos\ddab-enps-1h-dia-label-fee\ddab-enps-1h-DIA-Label-free	6.0338	0	0.277316	50.4316	P13639	P13639	EF2_HUMAN	Elongation factor 2
7.24478	7.24542	7.24325	7.13689	7.15842	7.16625	7.24448	7.15386	0.811656	-0.30106	+	D:\CHENYUWAN\20240212-dia-lumos\ddab-enps-1h-dia-label-fee\Blank-NPs-DIA-Label-free_D:\CHENYUWAN\20240212-dia-lumos\ddab-enps-1h-dia-label-fee\ddab-enps-1h-DIA-Label-free	3.29955	0.00195745	0.0906285	10.2972	P13645	P13645;CON_IPI00009865.2	K1C10_HUMAN	Keratin, type I cytoskeletal 10
6.3579	6.36247	6.36704	6.51856	6.53968	6.51689	6.36247	6.52504	1.45404	0.540067	+	D:\CHENYUWAN\20240212-dia-lumos\ddab-enps-1h-dia-label-fee\Blank-NPs-DIA-Label-free_D:\CHENYUWAN\20240212-dia-lumos\ddab-enps-1h-dia-label-fee\ddab-enps-1h-DIA-Label-free	4.50574	0.00034398	-0.162576	-20.8601	P13647	P13647;H0YIN9;H0YI76;CON_IPI00009867.3;CON_IPI00697851.1;CON_IPI00139301.3	K2C5_HUMAN	Keratin, type II cytoskeletal 5
7.25056	7.24677	7.24666	7.15205	7.15426	7.15899	7.248	7.1551	0.807427	-0.308597	+	D:\CHENYUWAN\20240212-dia-lumos\ddab-enps-1h-dia-label-fee\Blank-NPs-DIA-Label-free_D:\CHENYUWAN\20240212-dia-lumos\ddab-enps-1h-dia-label-fee\ddab-enps-1h-DIA-Label-free	5.56274	0	0.0928968	38.4356	P13667	P13667	PDIA4_HUMAN	Protein disulfide-isomerase A4
6.7634	6.77268	6.77345	6.63607	6.64501	6.63532	6.76984	6.6388	0.739545	-0.435291	+	D:\CHENYUWAN\20240212-dia-lumos\ddab-enps-1h-dia-label-fee\Blank-NPs-DIA-Label-free_D:\CHENYUWAN\20240212-dia-lumos\ddab-enps-1h-dia-label-fee\ddab-enps-1h-DIA-Label-free	5.0879	0.000557769	0.131036	29.2191	P13674	P13674	P4HA1_HUMAN	Prolyl 4-hydroxylase subunit alpha-1
6.46155	6.46956	6.44645	5.95126	5.94098	5.84174	6.45919	5.91133	0.28323	-1.81995	+	D:\CHENYUWAN\20240212-dia-lumos\ddab-enps-1h-dia-label-fee\Blank-NPs-DIA-Label-free_D:\CHENYUWAN\20240212-dia-lumos\ddab-enps-1h-dia-label-fee\ddab-enps-1h-DIA-Label-free	3.98436	0.000488449	0.547861	15.4029	P13693	P13693;A0A0B4J2C3;H0YCX0;J3KPG2;E9PJF7;Q5W0H4	TCTP_HUMAN	Translationally-controlled tumor protein
7.2	7.19663	7.21136	7.16643	7.16265	7.15456	7.20267	7.16121	0.908963	-0.137706	+	D:\CHENYUWAN\20240212-dia-lumos\ddab-enps-1h-dia-label-fee\Blank-NPs-DIA-Label-free_D:\CHENYUWAN\20240212-dia-lumos\ddab-enps-1h-dia-label-fee\ddab-enps-1h-DIA-Label-free	2.73135	0.00380148	0.0414535	7.3167	P13797	P13797;A0A0A0MSQ0	PLST_HUMAN	Plastin-3
6.21973	6.20505	6.21346	6.17491	6.16738	6.21768	6.21275	6.18666	0.941698	-0.0866636			0.736989	0.136836	0.0260886	1.60744	P13798	P13798;H7C1U0;C9JIF9;H0YFE5	ACPH_HUMAN	Acylamino-acid-releasing enzyme
7.29308	7.29917	7.29301	7.31646	7.32492	7.3197	7.29508	7.32036	1.05993	0.0839706	+	D:\CHENYUWAN\20240212-dia-lumos\ddab-enps-1h-dia-label-fee\Blank-NPs-DIA-Label-free_D:\CHENYUWAN\20240212-dia-lumos\ddab-enps-1h-dia-label-fee\ddab-enps-1h-DIA-Label-free	2.85865	0.00319422	-0.0252778	-7.9061	P13804	P13804;H0YNX6;H0YK49	ETFA_HUMAN	Electron transfer flavoprotein subunit alpha, mitochondrial
6.26975	6.24897	6.28672	6.05221	6.08306	6.01248	6.26848	6.04925	0.603633	-0.728257	+	D:\CHENYUWAN\20240212-dia-lumos\ddab-enps-1h-dia-label-fee\Blank-NPs-DIA-Label-free_D:\CHENYUWAN\20240212-dia-lumos\ddab-enps-1h-dia-label-fee\ddab-enps-1h-DIA-Label-free	3.15796	0.00217578	0.219227	9.46487	P13807	P13807	GYS1_HUMAN	Glycogen [starch] synthase, muscle
6.98686	6.99023	6.99501	6.95588	6.96165	6.96406	6.9907	6.96053	0.932888	-0.100225	+	D:\CHENYUWAN\20240212-dia-lumos\ddab-enps-1h-dia-label-fee\Blank-NPs-DIA-Label-free_D:\CHENYUWAN\20240212-dia-lumos\ddab-enps-1h-dia-label-fee\ddab-enps-1h-DIA-Label-free	3.056	0.00228	0.0301711	8.90478	P13861	P13861;H7C1L0	KAP2_HUMAN	cAMP-dependent protein kinase type II-alpha regulatory subunit
NaN	5.89949	6.14237	6.11186	6.19288	NaN	6.02093	6.15237	1.35345	0.436644			0.384595	0.384347	-0.131443	-1.02677	P13929	P13929;E5RGZ4	ENOB_HUMAN	Beta-enolase
6.30752	6.34153	6.31809	6.65292	6.66867	6.63077	6.32238	6.65078	2.13013	1.09094	+	D:\CHENYUWAN\20240212-dia-lumos\ddab-enps-1h-dia-label-fee\Blank-NPs-DIA-Label-free_D:\CHENYUWAN\20240212-dia-lumos\ddab-enps-1h-dia-label-fee\ddab-enps-1h-DIA-Label-free	4.60133	0.000358056	-0.328406	-22.0489	P13984	P13984	T2FB_HUMAN	General transcription factor IIF subunit 2
7.33089	7.34334	7.33928	7.34165	7.31032	7.32469	7.33784	7.32555	0.972118	-0.0407966			0.557382	0.222966	0.0122811	1.25718	P13987	P13987;E9PR17;H0YET2;E9PNW4	CD59_HUMAN	CD59 glycoprotein
7.39809	7.40287	7.39541	7.40013	7.38936	7.39637	7.39879	7.39529	0.991967	-0.0116356			0.383994	0.384677	0.00350253	0.912659	P13995	P13995;B9A062	MTDC_HUMAN	Bifunctional methylenetetrahydrofolate dehydrogenase/cyclohydrolase, mitochondrial
7.62393	7.61086	7.60986	7.34416	7.32893	7.41598	7.61488	7.36302	0.559937	-0.836663	+	D:\CHENYUWAN\20240212-dia-lumos\ddab-enps-1h-dia-label-fee\Blank-NPs-DIA-Label-free_D:\CHENYUWAN\20240212-dia-lumos\ddab-enps-1h-dia-label-fee\ddab-enps-1h-DIA-Label-free	3.12	0.00211989	0.251861	9.25268	P14174	P14174	MIF_HUMAN	Macrophage migration inhibitory factor
6.96322	6.93997	6.97593	6.90324	6.87556	6.8728	6.95971	6.88387	0.839765	-0.251943	+	D:\CHENYUWAN\20240212-dia-lumos\ddab-enps-1h-dia-label-fee\Blank-NPs-DIA-Label-free_D:\CHENYUWAN\20240212-dia-lumos\ddab-enps-1h-dia-label-fee\ddab-enps-1h-DIA-Label-free	2.21331	0.00722137	0.0758422	5.29225	P14209	P14209;A0A096LP69	CD99_HUMAN	CD99 antigen
7.51236	7.50545	7.51637	7.40306	7.39796	7.41314	7.51139	7.40472	0.782215	-0.354362	+	D:\CHENYUWAN\20240212-dia-lumos\ddab-enps-1h-dia-label-fee\Blank-NPs-DIA-Label-free_D:\CHENYUWAN\20240212-dia-lumos\ddab-enps-1h-dia-label-fee\ddab-enps-1h-DIA-Label-free	4.38519	0.000315315	0.106674	19.4505	P14314	P14314;A0A0C4DGP4;K7ELL7	GLU2B_HUMAN	Glucosidase 2 subunit beta
6.47054	6.44005	6.44581	6.4707	6.46705	6.51016	6.45213	6.48264	1.07277	0.101335			0.849919	0.103961	-0.0305045	-1.82968	P14324	P14324;A0A087WVN4;A0A087X1D8;A0A087WTP2	FPPS_HUMAN	Farnesyl pyrophosphate synthase
6.24233	6.26637	6.26341	6.34379	6.30537	6.32139	6.25737	6.32352	1.16452	0.219732	+	D:\CHENYUWAN\20240212-dia-lumos\ddab-enps-1h-dia-label-fee\Blank-NPs-DIA-Label-free_D:\CHENYUWAN\20240212-dia-lumos\ddab-enps-1h-dia-label-fee\ddab-enps-1h-DIA-Label-free	2.0979	0.00904615	-0.0661456	-4.9108	P14373	P14373;H0Y551;A0A140T9B9;A0A140T9V9;A0A140T9N6;A0A140T9Q6	TRI27_HUMAN	Zinc finger protein RFP
5.1881	5.26939	5.15374	5.25328	5.14195	5.13712	5.20374	5.17745	0.941251	-0.0873479			0.197749	0.765578	0.0262944	0.514169	P14384	P14384;F8W111;F8VVI6	CBPM_HUMAN	Carboxypeptidase M
7.47667	7.41376	7.4577	7.43074	7.46068	7.44723	7.44938	7.44622	0.992751	-0.0104962			0.0529562	0.953744	0.00315968	0.153814	P14406	P14406;H0UI06;D6RIE3;D6RGV5	CX7A2_HUMAN	Cytochrome c oxidase subunit 7A2, mitochondrial
6.04852	6.06443	6.05964	6.08518	6.13041	6.10303	6.05753	6.10621	1.11861	0.161709			1.59756	0.021473	-0.0486794	-3.48398	P14543	P14543	NID1_HUMAN	Nidogen-1
6.90419	6.94295	6.89851	6.91853	6.82491	6.89515	6.91522	6.87953	0.921116	-0.118545			0.495821	0.265163	0.0356859	1.13631	P14550	P14550;V9GYP9;V9GYG2;Q5T621	AK1A1_HUMAN	Alcohol dehydrogenase [NADP(+)]
7.50467	7.50742	7.50209	7.39013	7.38569	7.3997	7.50473	7.39184	0.771095	-0.37502	+	D:\CHENYUWAN\20240212-dia-lumos\ddab-enps-1h-dia-label-fee\Blank-NPs-DIA-Label-free_D:\CHENYUWAN\20240212-dia-lumos\ddab-enps-1h-dia-label-fee\ddab-enps-1h-DIA-Label-free	4.85806	0.000450161	0.112892	25.583	P14618	P14618;B4DNK4;H3BQ34;H3BTN5	KPYM_HUMAN	Pyruvate kinase PKM
8.33183	8.32834	8.33098	8.20832	8.20835	8.21897	8.33038	8.21188	0.761196	-0.39366	+	D:\CHENYUWAN\20240212-dia-lumos\ddab-enps-1h-dia-label-fee\Blank-NPs-DIA-Label-free_D:\CHENYUWAN\20240212-dia-lumos\ddab-enps-1h-dia-label-fee\ddab-enps-1h-DIA-Label-free	5.24832	0	0.118503	32.0564	P14625	P14625;Q96GW1	ENPL_HUMAN	Endoplasmin
7.79707	7.78963	7.79832	7.91207	7.91385	7.90642	7.79501	7.91078	1.30548	0.384585	+	D:\CHENYUWAN\20240212-dia-lumos\ddab-enps-1h-dia-label-fee\Blank-NPs-DIA-Label-free_D:\CHENYUWAN\20240212-dia-lumos\ddab-enps-1h-dia-label-fee\ddab-enps-1h-DIA-Label-free	5.29429	0	-0.115772	-32.9187	P14678	P63162;P14678;J3QLE5	RSMB_HUMAN	Small nuclear ribonucleoprotein-associated proteins B and B'
6.35248	6.3695	6.34703	6.19395	6.19515	6.2435	6.35634	6.21087	0.715369	-0.48324	+	D:\CHENYUWAN\20240212-dia-lumos\ddab-enps-1h-dia-label-fee\Blank-NPs-DIA-Label-free_D:\CHENYUWAN\20240212-dia-lumos\ddab-enps-1h-dia-label-fee\ddab-enps-1h-DIA-Label-free	2.92582	0.00284904	0.14547	8.23393	P14735	P14735	IDE_HUMAN	Insulin-degrading enzyme
7.34546	7.3377	7.34237	7.36801	7.36371	7.37075	7.34185	7.36749	1.06083	0.0851986	+	D:\CHENYUWAN\20240212-dia-lumos\ddab-enps-1h-dia-label-fee\Blank-NPs-DIA-Label-free_D:\CHENYUWAN\20240212-dia-lumos\ddab-enps-1h-dia-label-fee\ddab-enps-1h-DIA-Label-free	2.9626	0.00272027	-0.0256475	-8.41863	P14854	P14854	CX6B1_HUMAN	Cytochrome c oxidase subunit 6B1
7.67924	7.69433	7.67532	7.72734	7.71919	7.73463	7.68296	7.72705	1.10685	0.146459	+	D:\CHENYUWAN\20240212-dia-lumos\ddab-enps-1h-dia-label-fee\Blank-NPs-DIA-Label-free_D:\CHENYUWAN\20240212-dia-lumos\ddab-enps-1h-dia-label-fee\ddab-enps-1h-DIA-Label-free	2.41848	0.0055153	-0.0440885	-6.0287	P14866	P14866	HNRPL_HUMAN	Heterogeneous nuclear ribonucleoprotein L
7.20327	7.19659	7.20336	6.98374	6.99711	6.98681	7.20107	6.98922	0.613969	-0.703762	+	D:\CHENYUWAN\20240212-dia-lumos\ddab-enps-1h-dia-label-fee\Blank-NPs-DIA-Label-free_D:\CHENYUWAN\20240212-dia-lumos\ddab-enps-1h-dia-label-fee\ddab-enps-1h-DIA-Label-free	5.8677	0	0.211854	45.8267	P14868	P14868;H7C278	SYDC_HUMAN	Aspartate--tRNA ligase, cytoplasmic
7.30357	7.29981	7.2958	7.31705	7.32035	7.32342	7.29972	7.32027	1.04845	0.0682623	+	D:\CHENYUWAN\20240212-dia-lumos\ddab-enps-1h-dia-label-fee\Blank-NPs-DIA-Label-free_D:\CHENYUWAN\20240212-dia-lumos\ddab-enps-1h-dia-label-fee\ddab-enps-1h-DIA-Label-free	2.67761	0.00404298	-0.0205491	-7.07985	P14923	P14923;C9JKY1;C9JK18;K7ERP3;C9J826;C9JPI2;C9JTX4	PLAK_HUMAN	Junction plakoglobin
6.88296	6.86976	6.87104	6.89829	6.89976	6.90167	6.87458	6.8999	1.06003	0.0841101	+	D:\CHENYUWAN\20240212-dia-lumos\ddab-enps-1h-dia-label-fee\Blank-NPs-DIA-Label-free_D:\CHENYUWAN\20240212-dia-lumos\ddab-enps-1h-dia-label-fee\ddab-enps-1h-DIA-Label-free	2.37548	0.00602864	-0.0253197	-5.86777	P14927	P14927	QCR7_HUMAN	Cytochrome b-c1 complex subunit 7
6.89587	6.88883	6.89396	6.87512	6.86812	6.87271	6.89288	6.87198	0.953018	-0.069425	+	D:\CHENYUWAN\20240212-dia-lumos\ddab-enps-1h-dia-label-fee\Blank-NPs-DIA-Label-free_D:\CHENYUWAN\20240212-dia-lumos\ddab-enps-1h-dia-label-fee\ddab-enps-1h-DIA-Label-free	2.68571	0.00401153	0.0208991	7.11511	P15121	P15121	ALDR_HUMAN	Aldose reductase
6.76544	6.74761	6.72434	6.73686	6.71703	6.71573	6.7458	6.72321	0.949316	-0.075039			0.756661	0.130267	0.0225889	1.64594	P15151	P15151;A0A0C4DG49;A0A0A0MSA9	PVR_HUMAN	Poliovirus receptor
6.26963	6.26445	6.30207	6.1991	6.14817	6.1656	6.27872	6.17096	0.780264	-0.357967	+	D:\CHENYUWAN\20240212-dia-lumos\ddab-enps-1h-dia-label-fee\Blank-NPs-DIA-Label-free_D:\CHENYUWAN\20240212-dia-lumos\ddab-enps-1h-dia-label-fee\ddab-enps-1h-DIA-Label-free	2.31966	0.00634994	0.107759	5.66419	P15153	P15153;B1AH80;B1AH77	RAC2_HUMAN	Ras-related C3 botulinum toxin substrate 2
6.79653	6.79076	6.78318	6.41983	6.4094	6.41011	6.79016	6.41311	0.419715	-1.25252	+	D:\CHENYUWAN\20240212-dia-lumos\ddab-enps-1h-dia-label-fee\Blank-NPs-DIA-Label-free_D:\CHENYUWAN\20240212-dia-lumos\ddab-enps-1h-dia-label-fee\ddab-enps-1h-DIA-Label-free	6.68948	0	0.377045	73.5825	P15170	P15170	ERF3A_HUMAN	Eukaryotic peptide chain release factor GTP-binding subunit ERF3A
5.88884	5.89597	5.86095	5.75547	5.79646	5.81602	5.88192	5.78932	0.807972	-0.307623			1.94986	0.0117661	0.0926038	4.45265	P15289	P15289;A0A0C4DFZ2	ARSA_HUMAN	Arylsulfatase A
7.2138	7.21916	7.20532	7.2457	7.21411	7.2162	7.21276	7.22534	1.02938	0.0417821			0.501195	0.260101	-0.0125779	-1.14691	P15291	P15291;Q86XA6	B4GT1_HUMAN	Beta-1,4-galactosyltransferase 1
6.82766	6.83259	6.81911	6.74653	6.7457	6.75032	6.82646	6.74751	0.833793	-0.262239	+	D:\CHENYUWAN\20240212-dia-lumos\ddab-enps-1h-dia-label-fee\Blank-NPs-DIA-Label-free_D:\CHENYUWAN\20240212-dia-lumos\ddab-enps-1h-dia-label-fee\ddab-enps-1h-DIA-Label-free	4.33125	0.000302376	0.0789421	18.8506	P15311	P15311;E7EQR4	EZRI_HUMAN	Ezrin
6.00024	6.01374	6.00283	6.04111	5.975	6.00599	6.0056	6.00737	1.00407	0.00585545			0.0303749	0.980718	-0.00176287	-0.0902206	P15336	P15336;E9PBF9;H7C2N6;F5H629;B8ZZU6	ATF2_HUMAN	Cyclic AMP-dependent transcription factor ATF-2
5.44858	5.42529	5.36384	5.39935	5.33188	5.31111	5.41257	5.34745	0.860749	-0.216335			0.821534	0.111261	0.0651232	1.7735	P15374	P15374;A0A087WTB8;Q5TBK7	UCHL3_HUMAN	Ubiquitin carboxyl-terminal hydrolase isozyme L3
5.5866	5.62965	5.60103	5.59477	5.53226	5.58627	5.60576	5.5711	0.923295	-0.115136			0.675359	0.16017	0.0346599	1.48718	P15509	P15509;V9GYE9;J3JS74;F2Z3C9	CSF2R_HUMAN	Granulocyte-macrophage colony-stimulating factor receptor subunit alpha
7.10561	7.1002	7.09823	7.02037	7.02377	7.04627	7.10134	7.03014	0.848777	-0.236542	+	D:\CHENYUWAN\20240212-dia-lumos\ddab-enps-1h-dia-label-fee\Blank-NPs-DIA-Label-free_D:\CHENYUWAN\20240212-dia-lumos\ddab-enps-1h-dia-label-fee\ddab-enps-1h-DIA-Label-free	2.97018	0.00264594	0.0712064	8.45714	P15529	P15529	MCP_HUMAN	Membrane cofactor protein
7.68844	7.68481	7.69013	7.70765	7.71419	7.69283	7.68779	7.70489	1.04015	0.056785			1.23302	0.0436434	-0.017094	-2.62526	P15531	P15531;Q32Q12;J3KPD9;E7ERL0	NDKA_HUMAN	Nucleoside diphosphate kinase A
6.32539	6.31656	6.31877	6.22635	6.20714	6.19241	6.32024	6.20864	0.773384	-0.370744	+	D:\CHENYUWAN\20240212-dia-lumos\ddab-enps-1h-dia-label-fee\Blank-NPs-DIA-Label-free_D:\CHENYUWAN\20240212-dia-lumos\ddab-enps-1h-dia-label-fee\ddab-enps-1h-DIA-Label-free	3.40552	0.00156659	0.111605	10.9645	P15559	P15559;B4DLR8;H3BRK3	NQO1_HUMAN	NAD(P)H dehydrogenase [quinone] 1
6.71422	6.71993	6.69404	6.71634	6.70019	6.70537	6.7094	6.7073	0.995185	-0.00696387			0.0805779	0.922155	0.00209665	0.228233	P15586	P15586;H7C3P4;F5H4C6;H0YFA9;F6S8M0	GNS_HUMAN	N-acetylglucosamine-6-sulfatase
5.8212	5.83138	5.80069	5.85682	5.91798	5.833	5.81775	5.86927	1.12594	0.171132			0.893929	0.0934996	-0.0515164	-1.91732	P15848	P15848	ARSB_HUMAN	Arylsulfatase B
7.58935	7.58549	7.58583	7.32109	7.32314	7.32238	7.58689	7.3222	0.543639	-0.879279	+	D:\CHENYUWAN\20240212-dia-lumos\ddab-enps-1h-dia-label-fee\Blank-NPs-DIA-Label-free_D:\CHENYUWAN\20240212-dia-lumos\ddab-enps-1h-dia-label-fee\ddab-enps-1h-DIA-Label-free	8.36311	0	0.264689	192.883	P15880	P15880;E9PQD7;H0YEN5	RS2_HUMAN	40S ribosomal protein S2
NaN	4.6348	4.64881	4.68842	NaN	NaN	4.64181	4.68842	1.11331	0.15486			0	0.998549	-0.046618	0	P15884	P15884;Q99081;B4DGI9;B4DZP2;E9PH57;A0A1B0GVB8;H3BTP3;F5GY10;A0A1B0GVR6;A0A1B0GWD5;H0YNP8;H3BPJ7;A0A1B0GW91;A0A0D9SGH7	ITF2_HUMAN	Transcription factor 4
6.87776	6.88031	6.87294	6.85482	6.85571	6.85309	6.877	6.85454	0.949602	-0.074605	+	D:\CHENYUWAN\20240212-dia-lumos\ddab-enps-1h-dia-label-fee\Blank-NPs-DIA-Label-free_D:\CHENYUWAN\20240212-dia-lumos\ddab-enps-1h-dia-label-fee\ddab-enps-1h-DIA-Label-free	3.21555	0.00213549	0.0224584	9.79555	P15924	P15924	DESP_HUMAN	Desmoplakin
6.21506	6.21585	6.171	6.44083	6.43203	6.44417	6.20064	6.43901	1.73129	0.791849	+	D:\CHENYUWAN\20240212-dia-lumos\ddab-enps-1h-dia-label-fee\Blank-NPs-DIA-Label-free_D:\CHENYUWAN\20240212-dia-lumos\ddab-enps-1h-dia-label-fee\ddab-enps-1h-DIA-Label-free	4.00898	0.000497479	-0.238371	-15.6258	P15927	P15927;Q5TEJ7	RFA2_HUMAN	Replication protein A 32 kDa subunit
6.06999	6.02234	6.10714	6.16705	6.12496	6.15825	6.06649	6.15008	1.21225	0.277691			1.40682	0.0327365	-0.0835934	-3.0193	P15941	P15941;A6ZIE4;A6ZIE3;A0A087X0L2;B1AVQ7;A0A087WVJ0;A0A0A0MSH4;A0A0A0MRB3;A0A087WWM1;A0A087X2A4;A0A0C4DGW3	MUC1_HUMAN	Mucin-1
6.89649	6.93752	6.92731	6.96705	6.94574	6.98956	6.92044	6.96745	1.11432	0.156166			1.24931	0.0424964	-0.0470109	-2.66114	P15954	P15954;D6R9Z7	COX7C_HUMAN	Cytochrome c oxidase subunit 7C, mitochondrial
4.98328	4.94937	5.3848	NaN	5.0549	NaN	5.10582	5.0549	0.889381	-0.169127			0	0.998369	0.0509124	0	P16035	P16035;K7EIX4;B4DFW2	TIMP2_HUMAN	Metalloproteinase inhibitor 2
7.7713	7.76771	7.76913	7.78822	7.77982	7.79049	7.76938	7.78618	1.03943	0.0557951	+	D:\CHENYUWAN\20240212-dia-lumos\ddab-enps-1h-dia-label-fee\Blank-NPs-DIA-Label-free_D:\CHENYUWAN\20240212-dia-lumos\ddab-enps-1h-dia-label-fee\ddab-enps-1h-DIA-Label-free	2.10228	0.00897581	-0.016796	-4.92489	P16070	P16070;H0YCV9;H0Y5E4;H0YD13;H0YDW7;H0Y2P0;H0YDX6;H0YD17	CD44_HUMAN	CD44 antigen
8.63187	8.6034	8.64788	8.62722	8.65258	8.64776	8.62772	8.64252	1.03467	0.0491756			0.415655	0.344381	-0.0148029	-0.976721	P16104	P20671;Q8IUE6;P04908;Q99878;P0C0S8;Q96KK5;Q93077;Q7L7L0;Q9BTM1;P16104;A0A0U1RR32;A0A0U1RRH7;H0YFX9	H2AX_HUMAN	Histone H2AX
6.54224	6.55968	6.53649	6.47024	6.47904	6.4525	6.54613	6.46726	0.833925	-0.26201	+	D:\CHENYUWAN\20240212-dia-lumos\ddab-enps-1h-dia-label-fee\Blank-NPs-DIA-Label-free_D:\CHENYUWAN\20240212-dia-lumos\ddab-enps-1h-dia-label-fee\ddab-enps-1h-DIA-Label-free	2.77973	0.00362748	0.0788732	7.53591	P16152	P16152	CBR1_HUMAN	Carbonyl reductase [NADPH] 1
6.25324	6.25398	6.24991	6.30114	6.27855	6.30324	6.25237	6.29431	1.10138	0.139308	+	D:\CHENYUWAN\20240212-dia-lumos\ddab-enps-1h-dia-label-fee\Blank-NPs-DIA-Label-free_D:\CHENYUWAN\20240212-dia-lumos\ddab-enps-1h-dia-label-fee\ddab-enps-1h-DIA-Label-free	2.19837	0.00740693	-0.0419356	-5.24161	P16219	P16219;E9PE82	ACADS_HUMAN	Short-chain specific acyl-CoA dehydrogenase, mitochondrial
6.37234	6.3726	6.37495	6.36728	6.3655	6.34658	6.3733	6.35978	0.969364	-0.0448892			0.94723	0.0820583	0.0135131	2.02448	P16220	P16220;C9JBT4;C9J896;H7C1R5	CREB1_HUMAN	Cyclic AMP-responsive element-binding protein 1
6.72241	6.70925	6.71736	6.66773	6.68867	6.70133	6.71634	6.68591	0.93233	-0.101087			1.35213	0.0356605	0.0304306	2.89253	P16278	P16278;C9JF15;C9JWX1;E7EQ29;F8WF40	BGAL_HUMAN	Beta-galactosidase
5.39704	5.43604	5.42932	5.01915	NaN	5.00662	5.4208	5.01289	0.390917	-1.35507	+	D:\CHENYUWAN\20240212-dia-lumos\ddab-enps-1h-dia-label-fee\Blank-NPs-DIA-Label-free_D:\CHENYUWAN\20240212-dia-lumos\ddab-enps-1h-dia-label-fee\ddab-enps-1h-DIA-Label-free	3.86004	0.000443114	0.407916	25.139	P16333	P16333;O43639;E7ERP6;C9K098;C9J869;C9J0K5;E9PEE2;E7EPF5;C9JVV5;H7C5C7	NCK1_HUMAN	Cytoplasmic protein NCK1
NaN	NaN	5.42143	5.92084	NaN	5.89536	5.42143	5.9081	3.0667	1.61669			0	0.998188	-0.486671	0	P16383	P16383	GCFC2_HUMAN	GC-rich sequence DNA-binding factor 2
8.22213	8.22891	8.226	8.22479	8.23312	8.2467	8.22568	8.23487	1.02138	0.0305208			0.618132	0.188581	-0.00918738	-1.37572	P16401	P16401	H15_HUMAN	Histone H1.5
8.88206	8.87941	8.86779	8.91305	8.90378	8.93678	8.87642	8.91787	1.10015	0.137704			1.73847	0.0171828	-0.0414527	-3.85264	P16403	P16403;P16402;P10412	H12_HUMAN	Histone H1.2
7.0238	7.02102	7.01944	6.99976	7.00283	6.99827	7.02142	7.00029	0.952515	-0.0701868	+	D:\CHENYUWAN\20240212-dia-lumos\ddab-enps-1h-dia-label-fee\Blank-NPs-DIA-Label-free_D:\CHENYUWAN\20240212-dia-lumos\ddab-enps-1h-dia-label-fee\ddab-enps-1h-DIA-Label-free	3.47463	0.00131442	0.0211287	11.4216	P16435	P16435;H0Y4R2;E7EMD0	NCPR_HUMAN	NADPH--cytochrome P450 reductase
7.29589	7.29547	7.29891	7.23916	7.23633	7.24377	7.29676	7.23975	0.876987	-0.189372	+	D:\CHENYUWAN\20240212-dia-lumos\ddab-enps-1h-dia-label-fee\Blank-NPs-DIA-Label-free_D:\CHENYUWAN\20240212-dia-lumos\ddab-enps-1h-dia-label-fee\ddab-enps-1h-DIA-Label-free	4.71166	0.000394366	0.0570067	23.5043	P16615	P16615	AT2A2_HUMAN	Sarcoplasmic/endoplasmic reticulum calcium ATPase 2
6.56933	6.60571	6.58704	6.4185	6.40034	6.44152	6.58736	6.42012	0.680389	-0.555569	+	D:\CHENYUWAN\20240212-dia-lumos\ddab-enps-1h-dia-label-fee\Blank-NPs-DIA-Label-free_D:\CHENYUWAN\20240212-dia-lumos\ddab-enps-1h-dia-label-fee\ddab-enps-1h-DIA-Label-free	3.33736	0.0019193	0.167243	10.5308	P16949	P16949;A2A2D0	STMN1_HUMAN	Stathmin
6.48413	6.46282	6.48915	6.34714	6.33007	6.33219	6.4787	6.33647	0.720722	-0.472484	+	D:\CHENYUWAN\20240212-dia-lumos\ddab-enps-1h-dia-label-fee\Blank-NPs-DIA-Label-free_D:\CHENYUWAN\20240212-dia-lumos\ddab-enps-1h-dia-label-fee\ddab-enps-1h-DIA-Label-free	3.90102	0.000458204	0.142232	14.671	P16989	P16989	YBOX3_HUMAN	Y-box-binding protein 3
5.21483	5.36879	5.25483	5.3738	5.16798	5.36083	5.27949	5.30087	1.05047	0.0710339			0.0943349	0.905753	-0.0213831	-0.264092	P17010	P17010	ZFX_HUMAN	Zinc finger X-chromosomal protein
5.90418	5.89734	5.9141	5.93082	5.87424	5.86378	5.9052	5.88961	0.964738	-0.0517911			0.295554	0.553849	0.0155908	0.729087	P17028	P17028	ZNF24_HUMAN	Zinc finger protein 24
NaN	4.75288	NaN	NaN	NaN	5.43507	4.75288	5.43507	4.81054	2.2662			0	0.998008	-0.682195	0	P17029	P17029;E9PC66;B3KRF7	ZKSC1_HUMAN	Zinc finger protein with KRAB and SCAN domains 1
7.58017	7.57486	7.57799	7.61006	7.55603	7.58457	7.57768	7.58355	1.01363	0.0195296			0.138628	0.851758	-0.00587877	-0.374953	P17096	P17096	HMGA1_HUMAN	High mobility group protein HMG-I/HMG-Y
6.88791	6.91859	6.89817	6.90535	6.92578	6.92097	6.90156	6.91737	1.03708	0.0525274			0.654856	0.169814	-0.0158124	-1.44724	P17152	P17152	TMM11_HUMAN	Transmembrane protein 11, mitochondrial
6.48757	6.42695	6.44911	6.37128	6.36635	6.35579	6.45454	6.36447	0.8127	-0.299206	+	D:\CHENYUWAN\20240212-dia-lumos\ddab-enps-1h-dia-label-fee\Blank-NPs-DIA-Label-free_D:\CHENYUWAN\20240212-dia-lumos\ddab-enps-1h-dia-label-fee\ddab-enps-1h-DIA-Label-free	2.10208	0.00897119	0.0900702	4.92424	P17174	P17174	AATC_HUMAN	Aspartate aminotransferase, cytoplasmic
6.23452	6.26807	6.25628	6.17163	6.10902	6.16216	6.25296	6.14761	0.784596	-0.349977	+	D:\CHENYUWAN\20240212-dia-lumos\ddab-enps-1h-dia-label-fee\Blank-NPs-DIA-Label-free_D:\CHENYUWAN\20240212-dia-lumos\ddab-enps-1h-dia-label-fee\ddab-enps-1h-DIA-Label-free	2.07194	0.00946707	0.105354	4.82803	P17252	P17252	KPCA_HUMAN	Protein kinase C alpha type
6.37525	6.36273	6.37988	6.37371	6.37806	6.3702	6.37262	6.37399	1.00316	0.00455436			0.0868981	0.914832	-0.00137138	-0.2448	P17275	P17275	JUNB_HUMAN	Transcription factor jun-B
6.43902	6.42797	6.46473	6.40802	6.41379	6.38507	6.44391	6.40229	0.908626	-0.138242			1.38827	0.0336055	0.041615	2.976	P17301	P17301;E7ESP4;E7EMF1;E9PB77	ITA2_HUMAN	Integrin alpha-2
5.49217	5.4552	5.37438	5.61386	5.41618	5.51238	5.44059	5.51414	1.18455	0.244343			0.477704	0.281537	-0.0735547	-1.10051	P17405	P17405;G3V1E1;E9PQT3;E9PPK6	ASM_HUMAN	Sphingomyelin phosphodiesterase
6.87832	6.88325	6.87995	6.91576	6.90428	6.91895	6.88051	6.913	1.07768	0.107925	+	D:\CHENYUWAN\20240212-dia-lumos\ddab-enps-1h-dia-label-fee\Blank-NPs-DIA-Label-free_D:\CHENYUWAN\20240212-dia-lumos\ddab-enps-1h-dia-label-fee\ddab-enps-1h-DIA-Label-free	2.64404	0.00403911	-0.032489	-6.93533	P17480	P17480;E9PKP7;E9PMM2	UBF1_HUMAN	Nucleolar transcription factor 1
6.21868	6.26103	6.19077	6.3146	6.29564	6.29869	6.22349	6.30298	1.20084	0.264049			1.69615	0.0184603	-0.0794865	-3.73946	P17535	P17535	JUND_HUMAN	Transcription factor jun-D
5.84271	5.79079	5.87512	5.79667	5.85912	5.87499	5.83621	5.8436	1.01716	0.0245424			0.0757844	0.927878	-0.00738811	-0.215559	P17538;Q6GPI1	Q6GPI1;P17538;H3BMY1	CTRB1_HUMAN;CTRB2_HUMAN	Chymotrypsinogen B
6.09324	6.10993	6.10309	6.10198	6.12951	6.12612	6.10209	6.1192	1.0402	0.056857			0.79627	0.117173	-0.0171159	-1.7237	P17544	P17544;K7ELQ4;K7ESA4	ATF7_HUMAN	Cyclic AMP-dependent transcription factor ATF-7
6.45174	6.44246	6.42869	6.51352	6.4357	6.47211	6.44097	6.47378	1.07847	0.108991			0.62991	0.182339	-0.0328094	-1.39866	P17568	P17568	NDUB7_HUMAN	NADH dehydrogenase [ubiquinone] 1 beta subcomplex subunit 7
6.04248	6.04385	6.04939	6.00929	6.03758	6.00585	6.04524	6.01757	0.938285	-0.0919011			1.26373	0.0416952	0.0276648	2.69308	P17612	P17612;Q15136	KAPCA_HUMAN	cAMP-dependent protein kinase catalytic subunit alpha
6.44179	6.44051	6.45106	6.15684	6.13291	6.16085	6.44445	6.1502	0.507862	-0.977491	+	D:\CHENYUWAN\20240212-dia-lumos\ddab-enps-1h-dia-label-fee\Blank-NPs-DIA-Label-free_D:\CHENYUWAN\20240212-dia-lumos\ddab-enps-1h-dia-label-fee\ddab-enps-1h-DIA-Label-free	5.21947	0	0.294254	31.5268	P17655	P17655	CAN2_HUMAN	Calpain-2 catalytic subunit
6.5689	6.59075	6.55964	6.63985	6.61623	6.61509	6.57309	6.62372	1.12364	0.168185			1.83911	0.0147657	-0.0506287	-4.13082	P17676	P17676	CEBPB_HUMAN	CCAAT/enhancer-binding protein beta
6.19812	6.2488	6.24954	6.24812	6.24821	6.25691	6.23215	6.25108	1.04455	0.0628808			0.475553	0.283594	-0.0189285	-1.09625	P17706	P17706;K7ER87	PTN2_HUMAN	Tyrosine-protein phosphatase non-receptor type 2
6.67243	6.67434	6.6909	6.34589	6.35677	6.33453	6.67922	6.34573	0.463992	-1.10783	+	D:\CHENYUWAN\20240212-dia-lumos\ddab-enps-1h-dia-label-fee\Blank-NPs-DIA-Label-free_D:\CHENYUWAN\20240212-dia-lumos\ddab-enps-1h-dia-label-fee\ddab-enps-1h-DIA-Label-free	5.55867	0	0.333489	38.3454	P17812	Q9NRF8;P17812	PYRG1_HUMAN	CTP synthase 1
6.34889	6.3408	6.3443	6.34957	6.29774	6.35026	6.34467	6.33252	0.972426	-0.0403393			0.27815	0.59953	0.0121433	0.691931	P17813	P17813	EGLN_HUMAN	Endoglin
8.0931	8.08822	8.09429	8.05298	8.05076	8.04429	8.09187	8.04934	0.90671	-0.141287	+	D:\CHENYUWAN\20240212-dia-lumos\ddab-enps-1h-dia-label-fee\Blank-NPs-DIA-Label-free_D:\CHENYUWAN\20240212-dia-lumos\ddab-enps-1h-dia-label-fee\ddab-enps-1h-DIA-Label-free	3.73157	0.000569848	0.0425316	13.2853	P17844	P17844;J3QR02;J3QRQ7;X6RLV5;J3KRX8;J3KTA4	DDX5_HUMAN	Probable ATP-dependent RNA helicase DDX5
5.94603	5.97281	5.88695	5.77158	NaN	5.73195	5.93526	5.75177	0.655402	-0.609548			1.83823	0.0147814	0.183492	5.10821	P17858	P17858	PFKAL_HUMAN	ATP-dependent 6-phosphofructokinase, liver type
4.92506	5.04921	NaN	5.06777	5.08823	NaN	4.98714	5.078	1.23271	0.301837			0.544395	0.230552	-0.090862	-1.44426	P17900	P17900	SAP3_HUMAN	Ganglioside GM2 activator
6.50846	6.4916	6.50829	6.19981	6.12852	6.27204	6.50278	6.20012	0.498127	-1.00541	+	D:\CHENYUWAN\20240212-dia-lumos\ddab-enps-1h-dia-label-fee\Blank-NPs-DIA-Label-free_D:\CHENYUWAN\20240212-dia-lumos\ddab-enps-1h-dia-label-fee\ddab-enps-1h-DIA-Label-free	2.71407	0.00399707	0.302659	7.2398	P17931	P17931	LEG3_HUMAN	Galectin-3
7.34228	7.33225	7.31762	7.26035	7.26563	7.25564	7.33072	7.26054	0.850793	-0.23312	+	D:\CHENYUWAN\20240212-dia-lumos\ddab-enps-1h-dia-label-fee\Blank-NPs-DIA-Label-free_D:\CHENYUWAN\20240212-dia-lumos\ddab-enps-1h-dia-label-fee\ddab-enps-1h-DIA-Label-free	3.09023	0.00221723	0.0701763	9.08929	P17980	P17980;R4GNH3;E9PN50;E9PMD8;E9PLG2;E9PKD5	PRS6A_HUMAN	26S protease regulatory subunit 6A
7.46281	7.45607	7.4581	7.18045	7.18514	7.18809	7.45899	7.18456	0.531577	-0.91165	+	D:\CHENYUWAN\20240212-dia-lumos\ddab-enps-1h-dia-label-fee\Blank-NPs-DIA-Label-free_D:\CHENYUWAN\20240212-dia-lumos\ddab-enps-1h-dia-label-fee\ddab-enps-1h-DIA-Label-free	7.07411	0	0.274434	91.8292	P17987	P17987;E7EQR6;E7ERF2	TCPA_HUMAN	T-complex protein 1 subunit alpha
6.80804	6.8165	6.79842	6.76108	6.76786	6.7816	6.80766	6.77018	0.917327	-0.124493	+	D:\CHENYUWAN\20240212-dia-lumos\ddab-enps-1h-dia-label-fee\Blank-NPs-DIA-Label-free_D:\CHENYUWAN\20240212-dia-lumos\ddab-enps-1h-dia-label-fee\ddab-enps-1h-DIA-Label-free	2.0297	0.00997631	0.0374757	4.69558	P18031	P18031;B4DSN5	PTN1_HUMAN	Tyrosine-protein phosphatase non-receptor type 1
6.26415	6.25134	6.19118	6.27467	6.34385	6.30276	6.23556	6.30709	1.17907	0.237645			1.11557	0.0564186	-0.0715383	-2.37222	P18074	P18074;E7EVE9;A8MX75	ERCC2_HUMAN	TFIIH basal transcription factor complex helicase XPD subunit
7.68306	7.66634	7.64224	7.51804	7.52274	7.53256	7.66388	7.52445	0.725387	-0.463176	+	D:\CHENYUWAN\20240212-dia-lumos\ddab-enps-1h-dia-label-fee\Blank-NPs-DIA-Label-free_D:\CHENYUWAN\20240212-dia-lumos\ddab-enps-1h-dia-label-fee\ddab-enps-1h-DIA-Label-free	3.4216	0.00149657	0.13943	11.0694	P18077	P18077	RL35A_HUMAN	60S ribosomal protein L35a
6.66038	6.66067	6.65338	6.71991	6.71206	6.73302	6.65814	6.72166	1.15749	0.211006	+	D:\CHENYUWAN\20240212-dia-lumos\ddab-enps-1h-dia-label-fee\Blank-NPs-DIA-Label-free_D:\CHENYUWAN\20240212-dia-lumos\ddab-enps-1h-dia-label-fee\ddab-enps-1h-DIA-Label-free	3.19579	0.00222577	-0.063519	-9.68093	P18084	P18084	ITB5_HUMAN	Integrin beta-5
7.62822	7.62106	7.62631	7.40583	7.42445	7.42096	7.6252	7.41708	0.619278	-0.691342	+	D:\CHENYUWAN\20240212-dia-lumos\ddab-enps-1h-dia-label-fee\Blank-NPs-DIA-Label-free_D:\CHENYUWAN\20240212-dia-lumos\ddab-enps-1h-dia-label-fee\ddab-enps-1h-DIA-Label-free	5.35563	0	0.208115	34.1055	P18085	P18085;C9JPM4;C9JAK5	ARF4_HUMAN	ADP-ribosylation factor 4
7.95054	7.9457	7.94281	7.81348	7.81149	7.82336	7.94635	7.81611	0.740899	-0.432651	+	D:\CHENYUWAN\20240212-dia-lumos\ddab-enps-1h-dia-label-fee\Blank-NPs-DIA-Label-free_D:\CHENYUWAN\20240212-dia-lumos\ddab-enps-1h-dia-label-fee\ddab-enps-1h-DIA-Label-free	5.14735	0	0.130241	30.2403	P18124	P18124;A8MUD9	RL7_HUMAN	60S ribosomal protein L7
7.02258	7.02618	7.02061	6.88367	6.86282	6.86309	7.02312	6.86986	0.702645	-0.509132	+	D:\CHENYUWAN\20240212-dia-lumos\ddab-enps-1h-dia-label-fee\Blank-NPs-DIA-Label-free_D:\CHENYUWAN\20240212-dia-lumos\ddab-enps-1h-dia-label-fee\ddab-enps-1h-DIA-Label-free	4.56589	0.00035443	0.153264	21.6006	P18206	P18206;Q5JQ13	VINC_HUMAN	Vinculin
5.28663	5.27028	5.12219	5.2618	5.36378	5.32559	5.22637	5.31706	1.23222	0.301265			0.68567	0.156701	-0.0906897	-1.50728	P18433	P18433	PTPRA_HUMAN	Receptor-type tyrosine-protein phosphatase alpha
7.08629	7.06801	7.08237	7.06842	7.07598	7.07308	7.07889	7.07249	0.985375	-0.0212548			0.462648	0.294957	0.00639836	1.07065	P18564	P18564;A0A087WXP3;E9PEE8	ITB6_HUMAN	Integrin beta-6
7.17423	7.17412	7.16805	7.10561	7.11238	7.11278	7.17213	7.11025	0.867205	-0.205554	+	D:\CHENYUWAN\20240212-dia-lumos\ddab-enps-1h-dia-label-fee\Blank-NPs-DIA-Label-free_D:\CHENYUWAN\20240212-dia-lumos\ddab-enps-1h-dia-label-fee\ddab-enps-1h-DIA-Label-free	4.43193	0.000324074	0.0618779	19.9856	P18583	P18583;H7C1M2;J3QSZ5	SON_HUMAN	Protein SON
6.06422	6.05067	6.04601	6.21002	6.18948	6.20931	6.05363	6.20294	1.41028	0.49598	+	D:\CHENYUWAN\20240212-dia-lumos\ddab-enps-1h-dia-label-fee\Blank-NPs-DIA-Label-free_D:\CHENYUWAN\20240212-dia-lumos\ddab-enps-1h-dia-label-fee\ddab-enps-1h-DIA-Label-free	4.17612	0.000266667	-0.149305	-17.2244	P18615	P18615	NELFE_HUMAN	Negative elongation factor E
7.77189	7.76174	7.76749	7.583	7.57488	7.58161	7.76704	7.57983	0.649818	-0.621892	+	D:\CHENYUWAN\20240212-dia-lumos\ddab-enps-1h-dia-label-fee\Blank-NPs-DIA-Label-free_D:\CHENYUWAN\20240212-dia-lumos\ddab-enps-1h-dia-label-fee\ddab-enps-1h-DIA-Label-free	5.96449	0	0.187208	48.4564	P18621	P18621;A0A0A6YYL6;J3QQT2;A0A087WWH0;A0A087WY81;J3KSJ0;J3QS96;A0A087WXM6;J3KRX5;J3KRB3	RL17_HUMAN	60S ribosomal protein L17
6.99307	6.99927	7.00402	7.07819	7.03784	7.09952	6.99878	7.07185	1.18322	0.242713			1.78499	0.0162137	-0.0730642	-3.97963	P18669	P18669	PGAM1_HUMAN	Phosphoglycerate mutase 1
7.66505	7.67857	7.67555	7.68518	7.69071	7.68246	7.67306	7.68611	1.03053	0.0433811			1.28512	0.0401995	-0.0130588	-2.74075	P18754	P18754;C9JMJ4;C9JRH2;C9JW69;C9J3R0;C9JQZ4	RCC1_HUMAN	Regulator of chromosome condensation
6.26201	6.30058	6.21396	6.22917	6.19468	6.27904	6.25885	6.2343	0.945024	-0.0815777			0.282365	0.588258	0.0245576	0.700966	P18827	P18827	SDC1_HUMAN	Syndecan-1
6.69007	6.68892	6.67864	6.66918	6.65731	6.64793	6.68588	6.65814	0.938134	-0.0921348			1.74996	0.0169643	0.0277351	3.88377	P18846	P18846;P16220;E9PAR2;G5E998	ATF1_HUMAN	Cyclic AMP-dependent transcription factor ATF-1
5.76874	5.8259	5.75959	5.73083	5.7356	5.63055	5.78475	5.699	0.82082	-0.284862			1.00471	0.0730292	0.0857515	2.1415	P18850	P18850	ATF6A_HUMAN	Cyclic AMP-dependent transcription factor ATF-6 alpha
6.07357	6.08583	6.13248	6.36016	6.35447	6.31208	6.09729	6.34224	1.7577	0.813692	+	D:\CHENYUWAN\20240212-dia-lumos\ddab-enps-1h-dia-label-fee\Blank-NPs-DIA-Label-free_D:\CHENYUWAN\20240212-dia-lumos\ddab-enps-1h-dia-label-fee\ddab-enps-1h-DIA-Label-free	3.32026	0.00198276	-0.244946	-10.4245	P18858	P18858;B4E135;M0R0Q7;F5GZ28	DNLI1_HUMAN	DNA ligase 1
7.69489	7.71328	7.71221	7.70403	7.69215	7.68665	7.70679	7.69428	0.971595	-0.0415728			0.728884	0.139844	0.0125148	1.5916	P18859	P18859;A8MUH2	ATP5J_HUMAN	ATP synthase-coupling factor 6, mitochondrial
6.73647	6.70952	6.71687	6.79019	6.76894	6.73503	6.72095	6.76472	1.10603	0.145392			1.14591	0.052438	-0.0437668	-2.43668	P18887	P18887;F5H8D7	XRCC1_HUMAN	DNA repair protein XRCC1
7.32344	7.33335	7.32469	7.31295	7.30111	7.31431	7.32716	7.30946	0.960049	-0.0588203			1.56004	0.0231611	0.0177064	3.38962	P19022	P19022;C9J8J8	CADH2_HUMAN	Cadherin-2
5.54222	NaN	5.74129	5.61145	5.50135	NaN	5.64175	5.5564	0.82158	-0.283527			0.274667	0.60949	0.08535	0.750383	P19075	P19075	TSN8_HUMAN	Tetraspanin-8
6.40192	6.39631	6.44564	6.39344	6.32686	6.37668	6.41462	6.36566	0.893386	-0.162644			0.900761	0.0919988	0.048961	1.93099	P19099	P19099	C11B2_HUMAN	Cytochrome P450 11B2, mitochondrial
6.41607	6.41989	6.40777	6.43391	6.45275	6.38287	6.41458	6.42318	1.02	0.0285653			0.151503	0.834671	-0.00859912	-0.406034	P19256	P19256;B1AMW1;H0YDI1	LFA3_HUMAN	Lymphocyte function-associated antigen 3
8.11865	8.11204	8.12184	8.18714	8.19668	8.18906	8.11751	8.19096	1.18427	0.244001	+	D:\CHENYUWAN\20240212-dia-lumos\ddab-enps-1h-dia-label-fee\Blank-NPs-DIA-Label-free_D:\CHENYUWAN\20240212-dia-lumos\ddab-enps-1h-dia-label-fee\ddab-enps-1h-DIA-Label-free	4.2436	0.00028	-0.073452	-17.9141	P19338	P19338;C9J1H7;C9JLB1;C9JWL1;C9JYW2	NUCL_HUMAN	Nucleolin
6.7861	6.78641	6.78438	6.76299	6.76642	6.75179	6.78563	6.7604	0.943568	-0.0838012	+	D:\CHENYUWAN\20240212-dia-lumos\ddab-enps-1h-dia-label-fee\Blank-NPs-DIA-Label-free_D:\CHENYUWAN\20240212-dia-lumos\ddab-enps-1h-dia-label-fee\ddab-enps-1h-DIA-Label-free	2.31603	0.00633526	0.0252263	5.65119	P19367	P19367	HXK1_HUMAN	Hexokinase-1
6.46594	6.41991	6.45023	6.48152	6.5323	6.46797	6.44536	6.49393	1.11833	0.161349			0.955826	0.0810257	-0.048571	-2.04188	P19387	P19387	RPB3_HUMAN	DNA-directed RNA polymerase II subunit RPB3
7.10343	7.08814	7.10256	7.10213	7.1253	7.1243	7.09804	7.11724	1.0452	0.063781			0.996016	0.0741813	-0.0191997	-2.12369	P19388	P19388;A0A0A0MQR7;A0A087WVZ9	RPAB1_HUMAN	DNA-directed RNA polymerases I, II, and III subunit RPABC1
7.17906	7.18617	7.16043	7.20413	7.18199	7.17256	7.17522	7.18623	1.02566	0.0365589			0.382442	0.386902	-0.0110054	-0.9095	P19404	P19404;E7EPT4	NDUV2_HUMAN	NADH dehydrogenase [ubiquinone] flavoprotein 2, mitochondrial
6.72532	6.7544	6.74868	6.74512	6.75151	6.72254	6.7428	6.73973	0.992948	-0.0102105			0.0872939	0.914576	0.00307369	0.245832	P19440	A6NGU5;P19440;E7ET76	GGT1_HUMAN	Gamma-glutamyltranspeptidase 1
6.30053	6.32225	6.27005	6.27681	6.30422	6.30053	6.29761	6.29385	0.991394	-0.0124694			0.0758248	0.928002	0.00375382	0.215666	P19447	P19447;H7C309	ERCC3_HUMAN	TFIIH basal transcription factor complex helicase XPB subunit
6.08025	6.0656	6.0764	5.73362	5.73401	5.64733	6.07408	5.70499	0.427468	-1.22611	+	D:\CHENYUWAN\20240212-dia-lumos\ddab-enps-1h-dia-label-fee\Blank-NPs-DIA-Label-free_D:\CHENYUWAN\20240212-dia-lumos\ddab-enps-1h-dia-label-fee\ddab-enps-1h-DIA-Label-free	3.64923	0.000805263	0.369096	12.6585	P19525	P19525;C9JZT2;F8WBH4	E2AK2_HUMAN	Interferon-induced, double-stranded RNA-activated protein kinase
6.9309	6.88403	6.93019	6.78379	6.74676	6.76783	6.91504	6.76613	0.709716	-0.494686	+	D:\CHENYUWAN\20240212-dia-lumos\ddab-enps-1h-dia-label-fee\Blank-NPs-DIA-Label-free_D:\CHENYUWAN\20240212-dia-lumos\ddab-enps-1h-dia-label-fee\ddab-enps-1h-DIA-Label-free	2.85721	0.0031891	0.148916	7.89919	P19623	P19623;K7EL89	SPEE_HUMAN	Spermidine synthase
6.81487	6.84084	6.82004	6.78847	6.78372	6.79199	6.82525	6.78806	0.917917	-0.123565			1.96124	0.0114541	0.0371968	4.48671	P19784	P19784;H3BNI9	CSK22_HUMAN	Casein kinase II subunit alpha'
5.57612	5.7546	NaN	5.98801	5.93952	5.97294	5.66536	5.96682	2.00201	1.00145			1.65345	0.0195155	-0.301465	-4.36666	P19823	P19823;Q5T985	ITIH2_HUMAN	Inter-alpha-trypsin inhibitor heavy chain H2
6.05399	5.9806	6.11391	5.97212	6.00427	5.97917	6.0495	5.98519	0.862357	-0.213643			0.742049	0.135444	0.0643131	1.61734	P19838	P19838;D6RF93	NFKB1_HUMAN	Nuclear factor NF-kappa-B p105 subunit
6.83883	6.84672	6.83299	6.8406	6.83125	6.83987	6.83951	6.83724	0.994782	-0.00754742			0.172556	0.804522	0.00227181	0.455899	P20020	P20020;P23634	AT2B1_HUMAN	Plasma membrane calcium-transporting ATPase 1
6.79972	6.78871	6.78163	6.65567	6.62411	6.64386	6.79002	6.64121	0.709892	-0.494328	+	D:\CHENYUWAN\20240212-dia-lumos\ddab-enps-1h-dia-label-fee\Blank-NPs-DIA-Label-free_D:\CHENYUWAN\20240212-dia-lumos\ddab-enps-1h-dia-label-fee\ddab-enps-1h-DIA-Label-free	3.82486	0.000432749	0.148808	14.0318	P20042	P20042	IF2B_HUMAN	Eukaryotic translation initiation factor 2 subunit 2
6.56693	6.55336	6.55882	6.30938	6.30309	6.29992	6.5597	6.30413	0.555172	-0.848993	+	D:\CHENYUWAN\20240212-dia-lumos\ddab-enps-1h-dia-label-fee\Blank-NPs-DIA-Label-free_D:\CHENYUWAN\20240212-dia-lumos\ddab-enps-1h-dia-label-fee\ddab-enps-1h-DIA-Label-free	6.11872	0	0.255572	52.9616	P20073	P20073	ANXA7_HUMAN	Annexin A7
5.82934	5.75058	5.73077	5.6764	5.70767	5.76567	5.77023	5.71658	0.883784	-0.178234			0.602647	0.196671	0.0536537	1.34554	P20138	P20138	CD33_HUMAN	Myeloid cell surface antigen CD33
6.04652	5.94495	6.0284	5.98409	5.99483	6.01689	6.00662	5.99861	0.981714	-0.0266253			0.0869213	0.91497	0.00801531	0.24486	P20226	P20226;Q6SJ96;Q32MN6;A0A1B0GVC6	TBP_HUMAN	TATA-box-binding protein
5.79649	5.89291	NaN	5.83233	5.62849	5.77688	5.8447	5.7459	0.796534	-0.328192			0.473981	0.284884	0.0987961	1.14367	P20248	P20248	CCNA2_HUMAN	Cyclin-A2
6.37275	6.2975	6.37288	6.10526	6.19674	6.23482	6.34771	6.17894	0.678	-0.560643			1.67189	0.0190957	0.16877	3.67555	P20290	P20290	BTF3_HUMAN	Transcription factor BTF3
5.97951	6.17638	6.15992	6.17469	6.1623	6.09491	6.10527	6.14397	1.0932	0.128552			0.222957	0.721985	-0.0386979	-0.571128	P20338	P20338;A0A087WYT5	RAB4A_HUMAN	Ras-related protein Rab-4A
6.79668	6.6197	6.71484	6.63884	6.66259	6.74932	6.71041	6.68359	0.940114	-0.089093			0.165113	0.815712	0.0268194	0.438399	P20339	P20339	RAB5A_HUMAN	Ras-related protein Rab-5A
7.22876	7.23164	7.21976	7.25893	7.25307	7.25367	7.22672	7.25522	1.06783	0.0946838	+	D:\CHENYUWAN\20240212-dia-lumos\ddab-enps-1h-dia-label-fee\Blank-NPs-DIA-Label-free_D:\CHENYUWAN\20240212-dia-lumos\ddab-enps-1h-dia-label-fee\ddab-enps-1h-DIA-Label-free	2.67485	0.0040372	-0.0285026	-7.06788	P20340	P20340;F5H3K7	RAB6A_HUMAN	Ras-related protein Rab-6A
6.04335	6.00558	6.02259	6.07809	6.09734	6.10762	6.02384	6.09435	1.17628	0.234236	+	D:\CHENYUWAN\20240212-dia-lumos\ddab-enps-1h-dia-label-fee\Blank-NPs-DIA-Label-free_D:\CHENYUWAN\20240212-dia-lumos\ddab-enps-1h-dia-label-fee\ddab-enps-1h-DIA-Label-free	2.14393	0.00813467	-0.0705117	-5.06028	P20585	P20585	MSH3_HUMAN	DNA mismatch repair protein Msh3
7.06066	7.05049	7.05734	7.10319	7.10714	7.14072	7.05616	7.11701	1.15041	0.202143	+	D:\CHENYUWAN\20240212-dia-lumos\ddab-enps-1h-dia-label-fee\Blank-NPs-DIA-Label-free_D:\CHENYUWAN\20240212-dia-lumos\ddab-enps-1h-dia-label-fee\ddab-enps-1h-DIA-Label-free	2.11205	0.00884058	-0.0608516	-4.95641	P20618	P20618	PSB1_HUMAN	Proteasome subunit beta type-1
6.70096	6.68476	6.6912	6.65798	6.65981	6.66252	6.69231	6.66011	0.928528	-0.106983	+	D:\CHENYUWAN\20240212-dia-lumos\ddab-enps-1h-dia-label-fee\Blank-NPs-DIA-Label-free_D:\CHENYUWAN\20240212-dia-lumos\ddab-enps-1h-dia-label-fee\ddab-enps-1h-DIA-Label-free	2.56013	0.00502462	0.0322053	6.58531	P20645	P20645;F5H883;F5GXE0;F5GXU0;F5GX30	MPRD_HUMAN	Cation-dependent mannose-6-phosphate receptor
8.13873	8.10082	8.10361	8.10668	8.13002	8.13495	8.11438	8.12388	1.02212	0.0315594			0.251224	0.664337	-0.00950019	-0.633605	P20671	Q6FI13;Q16777;P20671;P04908;Q99878;P0C0S8;Q96KK5;Q93077;Q7L7L0;Q9BTM1;A0A0U1RR32;A0A0U1RRH7;H0YFX9	H2A1D_HUMAN	Histone H2A type 1-D
7.74178	7.72909	7.74277	7.71257	7.71551	7.72983	7.73788	7.7193	0.95813	-0.061707			1.26041	0.041829	0.018576	2.6857	P20674	P20674;H3BRM5;H3BV69	COX5A_HUMAN	Cytochrome c oxidase subunit 5A, mitochondrial
7.9865	7.99326	7.98719	8.00799	8.00214	8.00369	7.98898	8.0046	1.03662	0.0518885	+	D:\CHENYUWAN\20240212-dia-lumos\ddab-enps-1h-dia-label-fee\Blank-NPs-DIA-Label-free_D:\CHENYUWAN\20240212-dia-lumos\ddab-enps-1h-dia-label-fee\ddab-enps-1h-DIA-Label-free	2.31227	0.00637651	-0.0156198	-5.63768	P20700	P20700;A0A0D9SFE5;E9PBF6	LMNB1_HUMAN	Lamin-B1
7.9133	7.95463	NaN	7.96204	NaN	7.97691	7.93396	7.96948	1.08521	0.11798			0.606924	0.194942	-0.0355158	-1.61727	P20807	P20807;H3BS77;H3BMH1;F8W8F5;H3BS30;H3BV08;H3BNN7	CAN3_HUMAN	Calpain-3
6.52518	6.56255	6.52237	6.59946	6.59326	6.58463	6.5367	6.59245	1.13697	0.185192			1.8228	0.0152877	-0.0557481	-4.08485	P20810	P20810;B7Z574;E7ES10;E7EQA0;H0Y9H6;E9PDE4;H0Y7F0;E7EQ12;E9PCH5;A0A0C4DGB5;A0A0A0MR45;H0YD33;E7EVY3	ICAL_HUMAN	Calpastatin
6.09256	6.05332	6.05502	5.96058	5.96402	5.91854	6.06696	5.94771	0.759882	-0.396153	+	D:\CHENYUWAN\20240212-dia-lumos\ddab-enps-1h-dia-label-fee\Blank-NPs-DIA-Label-free_D:\CHENYUWAN\20240212-dia-lumos\ddab-enps-1h-dia-label-fee\ddab-enps-1h-DIA-Label-free	2.44644	0.00532417	0.119254	6.13529	P20839	P20839;C9J381;C9K0R9	IMDH1_HUMAN	Inosine-5'-monophosphate dehydrogenase 1
6.26554	6.28832	6.23423	6.18706	6.22139	6.25812	6.26269	6.22219	0.910958	-0.134544			0.717012	0.144554	0.0405019	1.56841	P20908	P20908;A0A087WXW9	CO5A1_HUMAN	Collagen alpha-1(V) chain
6.26723	6.28695	6.26301	6.24524	6.27248	6.24624	6.2724	6.25465	0.959965	-0.0589465			0.698795	0.150962	0.0177445	1.53287	P20933	P20933;H0Y9C7	ASPG_HUMAN	N(4)-(beta-N-acetylglucosaminyl)-L-asparaginase
5.97485	6.0071	6.04853	6.37833	6.36576	6.35104	6.01016	6.36504	2.26402	1.17889	+	D:\CHENYUWAN\20240212-dia-lumos\ddab-enps-1h-dia-label-fee\Blank-NPs-DIA-Label-free_D:\CHENYUWAN\20240212-dia-lumos\ddab-enps-1h-dia-label-fee\ddab-enps-1h-DIA-Label-free	4.00723	0.000495812	-0.35488	-15.6099	P20962	P20962;F5H7R9;F5GXR3	PTMS_HUMAN	Parathymosin
6.84683	6.83948	6.85834	6.86959	6.87216	6.85471	6.84822	6.86548	1.04056	0.0573653			1.04973	0.0662166	-0.0172685	-2.23434	P21127	P21127;Q9UQ88;Q5QPR4;B7ZVY7;J3QR29;A0A0D9SEN2;Q5QPR3;J3QR44;A0A0D9SEI3;A0A0D9SER5	CD11B_HUMAN	Cyclin-dependent kinase 11B
6.55976	6.57699	6.55625	6.17653	6.1837	6.18241	6.56433	6.18088	0.413569	-1.2738	+	D:\CHENYUWAN\20240212-dia-lumos\ddab-enps-1h-dia-label-fee\Blank-NPs-DIA-Label-free_D:\CHENYUWAN\20240212-dia-lumos\ddab-enps-1h-dia-label-fee\ddab-enps-1h-DIA-Label-free	6.2335	0	0.383452	56.5832	P21266	P21266;A0A0A0MTN3	GSTM3_HUMAN	Glutathione S-transferase Mu 3
6.85279	6.83747	6.85001	6.74108	6.76361	6.7586	6.84676	6.75443	0.80848	-0.306716	+	D:\CHENYUWAN\20240212-dia-lumos\ddab-enps-1h-dia-label-fee\Blank-NPs-DIA-Label-free_D:\CHENYUWAN\20240212-dia-lumos\ddab-enps-1h-dia-label-fee\ddab-enps-1h-DIA-Label-free	3.43071	0.00150518	0.0923308	11.1291	P21281	P21281;H0YC04	VATB2_HUMAN	V-type proton ATPase subunit B, brain isoform
6.40161	6.39514	6.38688	6.24442	6.25542	6.22072	6.39455	6.24019	0.70088	-0.512761	+	D:\CHENYUWAN\20240212-dia-lumos\ddab-enps-1h-dia-label-fee\Blank-NPs-DIA-Label-free_D:\CHENYUWAN\20240212-dia-lumos\ddab-enps-1h-dia-label-fee\ddab-enps-1h-DIA-Label-free	3.81111	0.000428986	0.154357	13.9192	P21283	P21283;E7EV59	VATC1_HUMAN	V-type proton ATPase subunit C 1
6.55988	6.56832	6.56549	6.39367	6.35156	6.34354	6.56457	6.36292	0.628577	-0.669838	+	D:\CHENYUWAN\20240212-dia-lumos\ddab-enps-1h-dia-label-fee\Blank-NPs-DIA-Label-free_D:\CHENYUWAN\20240212-dia-lumos\ddab-enps-1h-dia-label-fee\ddab-enps-1h-DIA-Label-free	3.66918	0.000551539	0.201642	12.8077	P21291	P21291;E9PS42	CSRP1_HUMAN	Cysteine and glycine-rich protein 1
7.64981	7.65651	7.64851	7.5261	7.51854	7.52849	7.65161	7.52438	0.746048	-0.422659	+	D:\CHENYUWAN\20240212-dia-lumos\ddab-enps-1h-dia-label-fee\Blank-NPs-DIA-Label-free_D:\CHENYUWAN\20240212-dia-lumos\ddab-enps-1h-dia-label-fee\ddab-enps-1h-DIA-Label-free	5.28317	0	0.127233	32.7081	P21333	P21333;Q60FE5;A0A087WWY3;Q5HY54	FLNA_HUMAN	Filamin-A
6.27653	6.30476	6.29111	6.2776	6.32405	6.31096	6.2908	6.3042	1.03134	0.0445194			0.346052	0.442423	-0.0134013	-0.83485	P21397	P21397	AOFA_HUMAN	Amine oxidase [flavin-containing] A
5.95356	5.91158	5.9845	5.7111	5.63844	5.68301	5.94988	5.67752	0.534115	-0.904778	+	D:\CHENYUWAN\20240212-dia-lumos\ddab-enps-1h-dia-label-fee\Blank-NPs-DIA-Label-free_D:\CHENYUWAN\20240212-dia-lumos\ddab-enps-1h-dia-label-fee\ddab-enps-1h-DIA-Label-free	3.09392	0.00222556	0.272365	9.10941	P21399	P21399	ACOC_HUMAN	Cytoplasmic aconitate hydratase
5.60943	5.68432	5.58208	5.5515	NaN	5.60238	5.62528	5.57694	0.894665	-0.160581			0.455856	0.300878	0.0483399	1.10436	P21583	P21583	SCF_HUMAN	Kit ligand
6.4073	6.40669	6.43027	6.41066	6.43982	6.4195	6.41475	6.42333	1.01994	0.0284778			0.299939	0.54289	-0.00857274	-0.738387	P21589	P21589;H0Y7R7	5NTD_HUMAN	5'-nucleotidase
7.06517	6.98863	7.14014	7.17225	7.18329	7.1611	7.06464	7.17222	1.28107	0.357346			1.14443	0.0526455	-0.107572	-2.43352	P21675	P21675;Q8IZX4	TAF1_HUMAN	Transcription initiation factor TFIID subunit 1
7.61544	7.61172	7.62062	7.60081	7.59603	7.61769	7.61593	7.60484	0.974792	-0.0368335			0.718287	0.143891	0.0110879	1.5709	P21796	P21796	VDAC1_HUMAN	Voltage-dependent anion-selective channel protein 1
6.96466	6.96096	6.96681	7.00671	7.0001	7.016	6.96414	7.0076	1.10524	0.144365	+	D:\CHENYUWAN\20240212-dia-lumos\ddab-enps-1h-dia-label-fee\Blank-NPs-DIA-Label-free_D:\CHENYUWAN\20240212-dia-lumos\ddab-enps-1h-dia-label-fee\ddab-enps-1h-DIA-Label-free	3.0436	0.00226968	-0.0434585	-8.83877	P21912	P21912	SDHB_HUMAN	Succinate dehydrogenase [ubiquinone] iron-sulfur subunit, mitochondrial
6.47675	6.46368	6.45083	6.50079	6.53232	6.48254	6.46375	6.50522	1.10017	0.137733			1.19199	0.0469506	-0.0414618	-2.53575	P21926	P21926;A6NNI4;G8JLH6	CD9_HUMAN	CD9 antigen
6.20218	6.22585	6.20451	6.23483	6.23928	6.23005	6.21084	6.23472	1.05652	0.0793177			1.39354	0.0334799	-0.0238771	-2.98827	P21953	P21953	ODBB_HUMAN	2-oxoisovalerate dehydrogenase subunit beta, mitochondrial
7.10457	7.10248	7.09356	7.04532	7.05761	7.05507	7.1002	7.05267	0.896323	-0.157909	+	D:\CHENYUWAN\20240212-dia-lumos\ddab-enps-1h-dia-label-fee\Blank-NPs-DIA-Label-free_D:\CHENYUWAN\20240212-dia-lumos\ddab-enps-1h-dia-label-fee\ddab-enps-1h-DIA-Label-free	3.15152	0.00216943	0.0475351	9.42857	P21964	P21964;E7EMS6	COMT_HUMAN	Catechol O-methyltransferase
6.33634	6.34115	6.35754	6.36801	6.39193	6.39406	6.34501	6.38467	1.09561	0.131737			1.70596	0.0183045	-0.0396565	-3.7655	P22033	P22033	MUTA_HUMAN	Methylmalonyl-CoA mutase, mitochondrial
6.04102	6.07493	6.07569	5.87005	5.89388	5.926	6.06388	5.89664	0.680398	-0.555548	+	D:\CHENYUWAN\20240212-dia-lumos\ddab-enps-1h-dia-label-fee\Blank-NPs-DIA-Label-free_D:\CHENYUWAN\20240212-dia-lumos\ddab-enps-1h-dia-label-fee\ddab-enps-1h-DIA-Label-free	2.96501	0.0026391	0.167236	8.43087	P22059	P22059	OSBP1_HUMAN	Oxysterol-binding protein 1
6.31172	6.32732	6.34197	6.18501	6.2368	6.1973	6.327	6.20637	0.75748	-0.400721	+	D:\CHENYUWAN\20240212-dia-lumos\ddab-enps-1h-dia-label-fee\Blank-NPs-DIA-Label-free_D:\CHENYUWAN\20240212-dia-lumos\ddab-enps-1h-dia-label-fee\ddab-enps-1h-DIA-Label-free	2.59752	0.00463115	0.120629	6.73932	P22061	P22061;A0A0A0MRJ6;H7BY58;F6S8N6	PIMT_HUMAN	Protein-L-isoaspartate(D-aspartate) O-methyltransferase
7.63765	7.63458	7.64062	7.6443	7.65042	7.64135	7.63762	7.64536	1.01798	0.0257073			1.14058	0.0532031	-0.00773875	-2.4253	P22087	P22087;M0R0P1;M0R1H0;M0QXL5;M0R2U2;M0R2B0;M0R299;M0R2Q4	FBRL_HUMAN	rRNA 2'-O-methyltransferase fibrillarin
6.68253	6.6917	6.70095	6.49593	6.48997	6.47515	6.69173	6.48702	0.624151	-0.680033	+	D:\CHENYUWAN\20240212-dia-lumos\ddab-enps-1h-dia-label-fee\Blank-NPs-DIA-Label-free_D:\CHENYUWAN\20240212-dia-lumos\ddab-enps-1h-dia-label-fee\ddab-enps-1h-DIA-Label-free	4.82629	0.000434783	0.20471	25.1169	P22102	P22102;C9JZG2;C9JKQ7;C9JTV6;C9JBJ1;F8WD69	PUR2_HUMAN	Trifunctional purine biosynthetic protein adenosine-3
6.53133	6.55909	6.54383	6.37	6.36489	6.38832	6.54475	6.3744	0.675548	-0.565871	+	D:\CHENYUWAN\20240212-dia-lumos\ddab-enps-1h-dia-label-fee\Blank-NPs-DIA-Label-free_D:\CHENYUWAN\20240212-dia-lumos\ddab-enps-1h-dia-label-fee\ddab-enps-1h-DIA-Label-free	4.0368	0.000510345	0.170344	15.8814	P22234	P22234;D6RF62;E9PBS1	PUR6_HUMAN	Multifunctional protein ADE2
7.05336	7.05792	7.07125	7.05956	7.04472	7.05145	7.06084	7.05191	0.979644	-0.0296704			0.579201	0.209487	0.0089318	1.29981	P22307	P22307;E9PLD1	NLTP_HUMAN	Non-specific lipid-transfer protein
7.02102	7.02385	7.01199	7.04239	7.03338	7.04893	7.01896	7.04157	1.05345	0.0751154			1.7668	0.0165119	-0.0226119	-3.92965	P22314	P22314	UBA1_HUMAN	Ubiquitin-like modifier-activating enzyme 1
6.05492	6.12437	6.0639	6.02569	5.76757	6.06251	6.08106	5.95192	0.742775	-0.429004			0.607453	0.194535	0.129143	1.35491	P22392	P22392;Q32Q12	NDKB_HUMAN	Nucleoside diphosphate kinase B
5.68996	5.7039	5.65148	5.68486	5.72383	5.74951	5.68178	5.7194	1.09049	0.124983			0.701092	0.150415	-0.0376239	-1.53734	P22413	P22413	ENPP1_HUMAN	Ectonucleotide pyrophosphatase/phosphodiesterase family member 1
6.01006	5.91395	5.99191	5.85201	5.93627	5.97622	5.97198	5.9215	0.890277	-0.167674			0.464237	0.293722	0.050475	1.07381	P22415	P22415;B1AQP1;E9PME6	USF1_HUMAN	Upstream stimulatory factor 1
4.81031	4.9088	4.94586	4.89349	4.87204	4.96289	4.88832	4.90947	1.0499	0.0702577			0.162765	0.819182	-0.0211496	-0.43285	P22466	P22466	GALA_HUMAN	Galanin peptides
6.52425	6.53309	6.52721	6.55731	6.55127	6.5495	6.52819	6.55269	1.05805	0.0814105	+	D:\CHENYUWAN\20240212-dia-lumos\ddab-enps-1h-dia-label-fee\Blank-NPs-DIA-Label-free_D:\CHENYUWAN\20240212-dia-lumos\ddab-enps-1h-dia-label-fee\ddab-enps-1h-DIA-Label-free	2.65331	0.00405895	-0.0245069	-6.97498	P22570	P22570;A0A0A0MSZ4;A0A0A0MTR6;A0A0C4DFN8;A0A0A0MT64;A0A0C4DGN7;A0A0A0MTN9;J3QQX3	ADRO_HUMAN	NADPH:adrenodoxin oxidoreductase, mitochondrial
8.53059	8.53009	8.54038	8.58628	8.57045	8.58613	8.53369	8.58096	1.11499	0.157028	+	D:\CHENYUWAN\20240212-dia-lumos\ddab-enps-1h-dia-label-fee\Blank-NPs-DIA-Label-free_D:\CHENYUWAN\20240212-dia-lumos\ddab-enps-1h-dia-label-fee\ddab-enps-1h-DIA-Label-free	2.79063	0.00351197	-0.0472698	-7.58612	P22626	P22626;A0A087WUI2	ROA2_HUMAN	Heterogeneous nuclear ribonucleoproteins A2/B1
6.11801	6.09441	6.16409	6.12625	6.14641	6.08994	6.12551	6.12087	0.989385	-0.015396			0.0611394	0.944114	0.00463454	0.176222	P22670	P22670	RFX1_HUMAN	MHC class II regulatory factor RFX1
6.47055	6.46498	6.45975	6.4151	6.4034	6.37993	6.46509	6.39948	0.859776	-0.217967	+	D:\CHENYUWAN\20240212-dia-lumos\ddab-enps-1h-dia-label-fee\Blank-NPs-DIA-Label-free_D:\CHENYUWAN\20240212-dia-lumos\ddab-enps-1h-dia-label-fee\ddab-enps-1h-DIA-Label-free	2.43038	0.00550246	0.0656142	6.07387	P22694	P17612;P22694;A0A0A0MS54;A0A087WVC4	KAPCB_HUMAN	cAMP-dependent protein kinase catalytic subunit beta
7.27255	7.27833	7.27123	7.28376	7.27781	7.28274	7.27404	7.28144	1.01719	0.0245845			1.2197	0.0443319	-0.00740099	-2.59607	P22695	P22695;H3BUI9;H3BUE4;A0A087WVZ4;H3BSJ9;H3BRG4;H3BP04	QCR2_HUMAN	Cytochrome b-c1 complex subunit 2, mitochondrial
6.2926	6.32552	6.33415	6.1578	6.11432	6.09764	6.31742	6.12325	0.639482	-0.645025	+	D:\CHENYUWAN\20240212-dia-lumos\ddab-enps-1h-dia-label-fee\Blank-NPs-DIA-Label-free_D:\CHENYUWAN\20240212-dia-lumos\ddab-enps-1h-dia-label-fee\ddab-enps-1h-DIA-Label-free	3.04504	0.00227174	0.194172	8.84641	P22736	P22736;P43354;F5GXF0	NR4A1_HUMAN	Nuclear receptor subfamily 4 group A member 1
6.65522	6.71647	6.69281	6.66323	6.64386	6.69313	6.68817	6.66674	0.951861	-0.0711767			0.395817	0.368831	0.0214264	0.936664	P22830	P22830;K7ELX4	HEMH_HUMAN	Ferrochelatase, mitochondrial
6.40913	6.44114	6.42063	6.29482	6.22603	6.24958	6.42363	6.25681	0.681053	-0.554162	+	D:\CHENYUWAN\20240212-dia-lumos\ddab-enps-1h-dia-label-fee\Blank-NPs-DIA-Label-free_D:\CHENYUWAN\20240212-dia-lumos\ddab-enps-1h-dia-label-fee\ddab-enps-1h-DIA-Label-free	2.77138	0.00366313	0.16682	7.49766	P23142	P23142;CON_IPI00705407.3	FBLN1_HUMAN	Fibulin-1
6.62772	6.65249	6.6278	6.78197	6.79762	6.80465	6.636	6.79475	1.44127	0.527339	+	D:\CHENYUWAN\20240212-dia-lumos\ddab-enps-1h-dia-label-fee\Blank-NPs-DIA-Label-free_D:\CHENYUWAN\20240212-dia-lumos\ddab-enps-1h-dia-label-fee\ddab-enps-1h-DIA-Label-free	3.93247	0.000471338	-0.158745	-14.9431	P23193	P23193;Q15560;Q5JRI7;B7Z4S1;A0A0A0MT58	TCEA1_HUMAN	Transcription elongation factor A protein 1
6.43905	6.44855	6.46589	6.48714	6.50555	6.45573	6.45116	6.48281	1.07558	0.105111			0.892216	0.093781	-0.0316416	-1.9139	P23229	P23229	ITA6_HUMAN	Integrin alpha-6
7.79168	7.78851	7.78892	7.7936	7.79189	7.7893	7.78971	7.7916	1.00436	0.00627734			0.519117	0.247205	-0.00188986	-1.18218	P23246	P23246	SFPQ_HUMAN	Splicing factor, proline- and glutamine-rich
6.57395	6.53911	6.56212	6.34035	6.24148	6.32506	6.55839	6.3023	0.554503	-0.850734	+	D:\CHENYUWAN\20240212-dia-lumos\ddab-enps-1h-dia-label-fee\Blank-NPs-DIA-Label-free_D:\CHENYUWAN\20240212-dia-lumos\ddab-enps-1h-dia-label-fee\ddab-enps-1h-DIA-Label-free	2.85902	0.00319679	0.256097	7.90785	P23258	Q9NRH3;P23258	TBG1_HUMAN	Tubulin gamma-1 chain
8.22585	8.22863	8.23255	8.12288	8.12712	8.11944	8.22901	8.12315	0.783671	-0.35168	+	D:\CHENYUWAN\20240212-dia-lumos\ddab-enps-1h-dia-label-fee\Blank-NPs-DIA-Label-free_D:\CHENYUWAN\20240212-dia-lumos\ddab-enps-1h-dia-label-fee\ddab-enps-1h-DIA-Label-free	5.44297	0	0.105866	35.869	P23284	P23284	PPIB_HUMAN	Peptidyl-prolyl cis-trans isomerase B
6.88361	6.87985	6.8941	6.91488	6.92782	6.91637	6.88586	6.91969	1.08102	0.112391	+	D:\CHENYUWAN\20240212-dia-lumos\ddab-enps-1h-dia-label-fee\Blank-NPs-DIA-Label-free_D:\CHENYUWAN\20240212-dia-lumos\ddab-enps-1h-dia-label-fee\ddab-enps-1h-DIA-Label-free	2.33731	0.00636012	-0.0338327	-5.72793	P23368	P23368	MAOM_HUMAN	NAD-dependent malic enzyme, mitochondrial
6.33659	6.34286	6.32596	6.02232	6.03956	6.02235	6.33514	6.02807	0.493102	-1.02004	+	D:\CHENYUWAN\20240212-dia-lumos\ddab-enps-1h-dia-label-fee\Blank-NPs-DIA-Label-free_D:\CHENYUWAN\20240212-dia-lumos\ddab-enps-1h-dia-label-fee\ddab-enps-1h-DIA-Label-free	5.65575	0	0.307063	40.5541	P23381	P23381;H0YJP3	SYWC_HUMAN	Tryptophan--tRNA ligase, cytoplasmic
7.85055	7.83516	7.84718	7.53265	7.55103	7.55213	7.84429	7.54527	0.502313	-0.993343	+	D:\CHENYUWAN\20240212-dia-lumos\ddab-enps-1h-dia-label-fee\Blank-NPs-DIA-Label-free_D:\CHENYUWAN\20240212-dia-lumos\ddab-enps-1h-dia-label-fee\ddab-enps-1h-DIA-Label-free	5.54532	0	0.299026	38.0511	P23396	P23396;E9PL09;E9PPU1;H0YCJ7;E9PJH4;E9PK82;E9PQ96;H0YF32;F2Z2S8	RS3_HUMAN	40S ribosomal protein S3
6.56491	6.56217	6.56207	6.55232	6.57736	6.60042	6.56305	6.5767	1.03192	0.0453377			0.417528	0.342159	-0.0136484	-0.980488	P23434	P23434;H3BUG8;H3BNV1;H3BQ30	GCSH_HUMAN	Glycine cleavage system H protein, mitochondrial
5.92912	5.93804	5.95079	5.78235	5.73049	5.75722	5.93932	5.75669	0.65671	-0.606673	+	D:\CHENYUWAN\20240212-dia-lumos\ddab-enps-1h-dia-label-fee\Blank-NPs-DIA-Label-free_D:\CHENYUWAN\20240212-dia-lumos\ddab-enps-1h-dia-label-fee\ddab-enps-1h-DIA-Label-free	3.44824	0.00137979	0.182627	11.245	P23458	P23458	JAK1_HUMAN	Tyrosine-protein kinase JAK1
NaN	NaN	5.71814	5.66488	5.69016	5.78781	5.71814	5.71429	0.991165	-0.0128027			0	0.997827	0.00385427	0	P23467	P23467;F8VU56	PTPRB_HUMAN	Receptor-type tyrosine-protein phosphatase beta
5.72303	5.7988	5.70216	5.90027	5.86146	5.84428	5.74133	5.86867	1.34073	0.423015			1.71049	0.0181248	-0.12734	-3.77759	P23497	Q9H930;P23497;H7BYP4;U5Y3L1;E9PHV6;C9JBL0	SP100_HUMAN	Nuclear autoantigen Sp-100
6.87372	6.88415	6.88954	6.97242	6.99349	6.98151	6.88247	6.98247	1.25894	0.332212	+	D:\CHENYUWAN\20240212-dia-lumos\ddab-enps-1h-dia-label-fee\Blank-NPs-DIA-Label-free_D:\CHENYUWAN\20240212-dia-lumos\ddab-enps-1h-dia-label-fee\ddab-enps-1h-DIA-Label-free	3.70012	0.000562842	-0.100005	-13.0425	P23526	P23526	SAHH_HUMAN	Adenosylhomocysteinase
7.08212	7.06168	7.06606	6.93003	6.93835	6.93856	7.06995	6.93565	0.733999	-0.44615	+	D:\CHENYUWAN\20240212-dia-lumos\ddab-enps-1h-dia-label-fee\Blank-NPs-DIA-Label-free_D:\CHENYUWAN\20240212-dia-lumos\ddab-enps-1h-dia-label-fee\ddab-enps-1h-DIA-Label-free	4.40624	0.000321101	0.134305	19.6898	P23528	Q9Y281;P23528;G3V1A4;E9PLJ3;E9PP50;E9PK25;E9PQB7	COF1_HUMAN	Cofilin-1
6.90208	6.8902	6.91884	6.65365	6.69341	6.62836	6.90371	6.65847	0.568547	-0.81465	+	D:\CHENYUWAN\20240212-dia-lumos\ddab-enps-1h-dia-label-fee\Blank-NPs-DIA-Label-free_D:\CHENYUWAN\20240212-dia-lumos\ddab-enps-1h-dia-label-fee\ddab-enps-1h-DIA-Label-free	3.53878	0.000850433	0.245234	11.862	P23588	P23588;F8VP89;F8W0K0;E7EX17;F8VSC7	IF4B_HUMAN	Eukaryotic translation initiation factor 4B
4.89925	4.77231	4.90097	4.91221	4.64889	4.73723	4.85751	4.76611	0.810218	-0.303619			0.444627	0.311471	0.0913987	1.03477	P23610	P23610	F8I2_HUMAN	Factor VIII intron 22 protein
6.25008	6.28322	6.22452	6.28031	6.27445	6.20722	6.25261	6.254	1.0032	0.00460973			0.0158866	0.995411	-0.0013876	-0.0479153	P23634	P23634	AT2B4_HUMAN	Plasma membrane calcium-transporting ATPase 4
6.56164	6.54451	6.56382	6.59043	6.58634	6.59378	6.55665	6.59018	1.08026	0.111381	+	D:\CHENYUWAN\20240212-dia-lumos\ddab-enps-1h-dia-label-fee\Blank-NPs-DIA-Label-free_D:\CHENYUWAN\20240212-dia-lumos\ddab-enps-1h-dia-label-fee\ddab-enps-1h-DIA-Label-free	2.17955	0.00784954	-0.0335291	-5.17837	P23786	P23786;A0A1B0GWC0;A0A1B0GVF3;A0A1B0GTB8;A0A1B0GV75	CPT2_HUMAN	Carnitine O-palmitoyltransferase 2, mitochondrial
6.68928	6.67529	6.69695	6.6302	6.62422	6.59274	6.68717	6.61572	0.848298	-0.237357	+	D:\CHENYUWAN\20240212-dia-lumos\ddab-enps-1h-dia-label-fee\Blank-NPs-DIA-Label-free_D:\CHENYUWAN\20240212-dia-lumos\ddab-enps-1h-dia-label-fee\ddab-enps-1h-DIA-Label-free	2.24422	0.00692222	0.0714515	5.39827	P23919	P23919;H7C312	KTHY_HUMAN	Thymidylate kinase
7.27251	7.26884	7.27477	6.97879	6.98501	6.99504	7.27204	6.98628	0.517899	-0.949258	+	D:\CHENYUWAN\20240212-dia-lumos\ddab-enps-1h-dia-label-fee\Blank-NPs-DIA-Label-free_D:\CHENYUWAN\20240212-dia-lumos\ddab-enps-1h-dia-label-fee\ddab-enps-1h-DIA-Label-free	6.2366	0	0.285755	56.6842	P23921	P23921;E9PL69;H0YCY7;E9PP77	RIR1_HUMAN	Ribonucleoside-diphosphate reductase large subunit
6.69828	6.7056	6.71674	6.69582	6.71327	6.73284	6.70687	6.71398	1.01649	0.0235934			0.233047	0.702281	-0.00710217	-0.593587	P24311	P24311	COX7B_HUMAN	Cytochrome c oxidase subunit 7B, mitochondrial
6.0136	6.05521	6.01173	6.03677	6.05678	6.01064	6.02685	6.03473	1.01832	0.0261967			0.150909	0.835048	-0.00788577	-0.404611	P24390	P24390	ERD21_HUMAN	ER lumen protein-retaining receptor 1
5.68259	4.69943	5.6899	5.62486	5.5279	4.66981	5.3573	5.27419	0.825821	-0.276099			0.0646377	0.939149	0.0831135	0.185706	P24468	P24468	COT2_HUMAN	COUP transcription factor 2
7.19499	7.19278	7.1896	6.9728	6.97252	6.99339	7.19246	6.97957	0.612509	-0.707198	+	D:\CHENYUWAN\20240212-dia-lumos\ddab-enps-1h-dia-label-fee\Blank-NPs-DIA-Label-free_D:\CHENYUWAN\20240212-dia-lumos\ddab-enps-1h-dia-label-fee\ddab-enps-1h-DIA-Label-free	5.13625	0	0.212888	30.0469	P24534	P24534;C9JZW3	EF1B_HUMAN	Elongation factor 1-beta
7.38174	7.3945	7.38519	7.4067	7.40446	7.41056	7.38714	7.40724	1.04737	0.0667685	+	D:\CHENYUWAN\20240212-dia-lumos\ddab-enps-1h-dia-label-fee\Blank-NPs-DIA-Label-free_D:\CHENYUWAN\20240212-dia-lumos\ddab-enps-1h-dia-label-fee\ddab-enps-1h-DIA-Label-free	2.05646	0.00965829	-0.0200992	-4.77916	P24539	P24539;Q5QNZ2	AT5F1_HUMAN	ATP synthase F(0) complex subunit B1, mitochondrial
6.7381	6.74965	6.76228	6.31798	6.34696	6.29627	6.75001	6.3204	0.37187	-1.42713	+	D:\CHENYUWAN\20240212-dia-lumos\ddab-enps-1h-dia-label-fee\Blank-NPs-DIA-Label-free_D:\CHENYUWAN\20240212-dia-lumos\ddab-enps-1h-dia-label-fee\ddab-enps-1h-DIA-Label-free	4.91414	0.00047138	0.429609	26.4264	P24666	P24666;G5E9R5	PPAC_HUMAN	Low molecular weight phosphotyrosine protein phosphatase
5.69275	5.5587	5.56523	5.4831	5.54387	5.51488	5.60556	5.51395	0.809825	-0.304317			0.909169	0.0898719	0.0916084	1.94784	P24723	P24723;G3V4Q6	KPCL_HUMAN	Protein kinase C eta type
7.4764	7.47811	7.48599	7.50246	7.49964	7.49775	7.48017	7.49995	1.04661	0.0657277	+	D:\CHENYUWAN\20240212-dia-lumos\ddab-enps-1h-dia-label-fee\Blank-NPs-DIA-Label-free_D:\CHENYUWAN\20240212-dia-lumos\ddab-enps-1h-dia-label-fee\ddab-enps-1h-DIA-Label-free	2.43063	0.00550585	-0.0197859	-6.07482	P24752	P24752	THIL_HUMAN	Acetyl-CoA acetyltransferase, mitochondrial
7.30312	7.30299	7.31021	7.1167	7.11798	7.12703	7.30544	7.12057	0.653328	-0.614122	+	D:\CHENYUWAN\20240212-dia-lumos\ddab-enps-1h-dia-label-fee\Blank-NPs-DIA-Label-free_D:\CHENYUWAN\20240212-dia-lumos\ddab-enps-1h-dia-label-fee\ddab-enps-1h-DIA-Label-free	5.86807	0	0.184869	45.8363	P24844	P24844	MYL9_HUMAN	Myosin regulatory light polypeptide 9
6.52857	6.52194	6.53501	6.58879	6.5798	6.57778	6.52851	6.58212	1.1314	0.178106	+	D:\CHENYUWAN\20240212-dia-lumos\ddab-enps-1h-dia-label-fee\Blank-NPs-DIA-Label-free_D:\CHENYUWAN\20240212-dia-lumos\ddab-enps-1h-dia-label-fee\ddab-enps-1h-DIA-Label-free	3.3451	0.00165789	-0.0536156	-10.5792	P24928	P24928	RPB1_HUMAN	DNA-directed RNA polymerase II subunit RPB1
6.24455	6.21921	6.2226	6.15514	6.14876	6.1513	6.22879	6.15173	0.83742	-0.255977	+	D:\CHENYUWAN\20240212-dia-lumos\ddab-enps-1h-dia-label-fee\Blank-NPs-DIA-Label-free_D:\CHENYUWAN\20240212-dia-lumos\ddab-enps-1h-dia-label-fee\ddab-enps-1h-DIA-Label-free	3.15533	0.00217366	0.0770564	9.45006	P24941	P24941;G3V5T9;E7ESI2	CDK2_HUMAN	Cyclin-dependent kinase 2
5.10297	5.12239	5.05276	5.04582	5.08582	5.0325	5.09271	5.05471	0.916232	-0.126216			0.65604	0.169336	0.037995	1.44955	P25054	P25054;E9PFT7;E7EMH9	APC_HUMAN	Adenomatous polyposis coli protein
7.31552	7.32587	7.32664	7.48302	7.48757	7.4931	7.32268	7.4879	1.46292	0.54885	+	D:\CHENYUWAN\20240212-dia-lumos\ddab-enps-1h-dia-label-fee\Blank-NPs-DIA-Label-free_D:\CHENYUWAN\20240212-dia-lumos\ddab-enps-1h-dia-label-fee\ddab-enps-1h-DIA-Label-free	5.43632	0	-0.165221	-35.7316	P25205	P25205;J3KQ69	MCM3_HUMAN	DNA replication licensing factor MCM3
5.42608	5.50491	5.51942	5.34134	5.41219	5.22878	5.48347	5.32744	0.698178	-0.518333			1.20673	0.0455801	0.156034	2.56777	P25208	P25208;F8VSL3	NFYB_HUMAN	Nuclear transcription factor Y subunit beta
6.48027	6.48816	6.4995	6.48105	6.48581	6.48907	6.48931	6.48531	0.990833	-0.0132855			0.263917	0.633737	0.00399923	0.661235	P25325	P25325;B1AH49	THTM_HUMAN	3-mercaptopyruvate sulfurtransferase
7.54272	7.54557	7.5426	7.255	7.2522	7.2698	7.54363	7.259	0.519246	-0.94551	+	D:\CHENYUWAN\20240212-dia-lumos\ddab-enps-1h-dia-label-fee\Blank-NPs-DIA-Label-free_D:\CHENYUWAN\20240212-dia-lumos\ddab-enps-1h-dia-label-fee\ddab-enps-1h-DIA-Label-free	6.06384	0	0.284627	51.3125	P25398	P25398	RS12_HUMAN	40S ribosomal protein S12
6.07835	6.08931	6.08921	5.95236	5.89786	5.91002	6.08562	5.92008	0.683051	-0.549934	+	D:\CHENYUWAN\20240212-dia-lumos\ddab-enps-1h-dia-label-fee\Blank-NPs-DIA-Label-free_D:\CHENYUWAN\20240212-dia-lumos\ddab-enps-1h-dia-label-fee\ddab-enps-1h-DIA-Label-free	3.21431	0.00213118	0.165547	9.78829	P25440	P25440;H0Y6K2;A0A0G2JHN8;A0A0G2JK44;A0A140T9E9;A0A140T9I1	BRD2_HUMAN	Bromodomain-containing protein 2
5.34555	5.25346	5.29414	5.30396	5.2211	5.31362	5.29772	5.27956	0.959054	-0.0603162			0.173435	0.803562	0.0181575	0.457958	P25445	P25445;H7C5Z8;A0A087WTM9	TNR6_HUMAN	Tumor necrosis factor receptor superfamily member 6
6.68507	6.6713	6.68418	6.69088	6.68617	6.671	6.68018	6.68268	1.00578	0.00831257			0.122368	0.870299	-0.00250196	-0.335005	P25490	P25490;O15391	TYY1_HUMAN	Transcriptional repressor protein YY1
6.84123	6.84286	6.82512	6.48798	6.48962	6.46161	6.8364	6.47974	0.439879	-1.18482	+	D:\CHENYUWAN\20240212-dia-lumos\ddab-enps-1h-dia-label-fee\Blank-NPs-DIA-Label-free_D:\CHENYUWAN\20240212-dia-lumos\ddab-enps-1h-dia-label-fee\ddab-enps-1h-DIA-Label-free	5.31651	0	0.356666	33.3438	P25685	P25685	DNJB1_HUMAN	DnaJ homolog subfamily B member 1
5.67174	5.60428	5.80934	5.72094	5.71242	5.60965	5.69512	5.681	0.968008	-0.0469089			0.0704458	0.933544	0.0141212	0.201329	P25686	P25686;C9JXB9;C9JRD2	DNJB2_HUMAN	DnaJ homolog subfamily B member 2
8.38066	8.37935	8.38588	8.39205	8.39497	8.39673	8.38196	8.39458	1.02948	0.0419194	+	D:\CHENYUWAN\20240212-dia-lumos\ddab-enps-1h-dia-label-fee\Blank-NPs-DIA-Label-free_D:\CHENYUWAN\20240212-dia-lumos\ddab-enps-1h-dia-label-fee\ddab-enps-1h-DIA-Label-free	2.1944	0.00757066	-0.012619	-5.22821	P25705	P25705;K7EQH4;K7EJP1;K7EK77;K7ENJ4;K7ERX7	ATPA_HUMAN	ATP synthase subunit alpha, mitochondrial
6.99215	6.99028	6.99661	7.02842	7.03197	7.04004	6.99301	7.03348	1.09765	0.134415	+	D:\CHENYUWAN\20240212-dia-lumos\ddab-enps-1h-dia-label-fee\Blank-NPs-DIA-Label-free_D:\CHENYUWAN\20240212-dia-lumos\ddab-enps-1h-dia-label-fee\ddab-enps-1h-DIA-Label-free	3.30544	0.00196162	-0.0404627	-10.3333	P25786	P25786;F5GX11	PSA1_HUMAN	Proteasome subunit alpha type-1
6.75609	6.76367	6.75584	6.78323	6.77701	6.77172	6.75853	6.77732	1.04421	0.0624124			1.95553	0.0116226	-0.0187877	-4.46959	P25787	P25787;A0A024RA52;C9JCK5	PSA2_HUMAN	Proteasome subunit alpha type-2
6.80539	6.81181	6.82741	6.85368	6.85911	6.85453	6.81487	6.85577	1.09876	0.135881	+	D:\CHENYUWAN\20240212-dia-lumos\ddab-enps-1h-dia-label-fee\Blank-NPs-DIA-Label-free_D:\CHENYUWAN\20240212-dia-lumos\ddab-enps-1h-dia-label-fee\ddab-enps-1h-DIA-Label-free	2.4263	0.00553903	-0.0409044	-6.05835	P25788	P25788;G3V5N4;G3V3W4	PSA3_HUMAN	Proteasome subunit alpha type-3
7.14422	7.14417	7.1471	7.16985	7.17504	7.18163	7.14516	7.17551	1.07237	0.100802	+	D:\CHENYUWAN\20240212-dia-lumos\ddab-enps-1h-dia-label-fee\Blank-NPs-DIA-Label-free_D:\CHENYUWAN\20240212-dia-lumos\ddab-enps-1h-dia-label-fee\ddab-enps-1h-DIA-Label-free	2.99107	0.00251358	-0.0303442	-8.56416	P25789	P25789;H0YL69;H0YLC2;H0YMZ1;H0YMA1;H0YN18;H0YKS0;H0YMV3;H0YKT8	PSA4_HUMAN	Proteasome subunit alpha type-4
6.82305	6.80082	6.81998	6.56539	6.54091	6.48514	6.81462	6.53048	0.519835	-0.943875	+	D:\CHENYUWAN\20240212-dia-lumos\ddab-enps-1h-dia-label-fee\Blank-NPs-DIA-Label-free_D:\CHENYUWAN\20240212-dia-lumos\ddab-enps-1h-dia-label-fee\ddab-enps-1h-DIA-Label-free	3.48368	0.00132381	0.284134	11.4828	P25815	P25815	S100P_HUMAN	Protein S100-P
7.03095	7.03172	7.03687	7.03232	7.03338	7.02888	7.03318	7.03153	0.996201	-0.00549115			0.290631	0.56678	0.00165288	0.718618	P26006	P26006	ITA3_HUMAN	Integrin alpha-3
7.77484	7.77048	7.77553	7.68403	7.68672	7.67723	7.77361	7.68266	0.811041	-0.302153	+	D:\CHENYUWAN\20240212-dia-lumos\ddab-enps-1h-dia-label-fee\Blank-NPs-DIA-Label-free_D:\CHENYUWAN\20240212-dia-lumos\ddab-enps-1h-dia-label-fee\ddab-enps-1h-DIA-Label-free	5.02012	0.000532319	0.0909573	28.0966	P26038	P26038;V9GZ54	MOES_HUMAN	Moesin
6.94289	6.9452	6.95092	6.90782	6.89597	6.90243	6.94634	6.90207	0.903098	-0.147045	+	D:\CHENYUWAN\20240212-dia-lumos\ddab-enps-1h-dia-label-fee\Blank-NPs-DIA-Label-free_D:\CHENYUWAN\20240212-dia-lumos\ddab-enps-1h-dia-label-fee\ddab-enps-1h-DIA-Label-free	3.3489	0.00166337	0.044265	10.6031	P26196	P26196	DDX6_HUMAN	Probable ATP-dependent RNA helicase DDX6
6.88115	6.87372	6.88511	6.90795	6.918	6.90135	6.88	6.9091	1.06931	0.0966836	+	D:\CHENYUWAN\20240212-dia-lumos\ddab-enps-1h-dia-label-fee\Blank-NPs-DIA-Label-free_D:\CHENYUWAN\20240212-dia-lumos\ddab-enps-1h-dia-label-fee\ddab-enps-1h-DIA-Label-free	2.11038	0.00889555	-0.0291049	-4.95101	P26358	P26358;K7EJL0;K7EIZ6;K7EMU8	DNMT1_HUMAN	DNA (cytosine-5)-methyltransferase 1
7.62417	7.62959	7.62174	7.61348	7.62986	7.64497	7.62516	7.62944	1.00989	0.0141968			0.172345	0.80466	-0.00427357	-0.455405	P26368	P26368;K7ENG2	U2AF2_HUMAN	Splicing factor U2AF 65 kDa subunit
7.84607	7.83342	7.85119	7.66942	7.67631	7.66876	7.84356	7.6715	0.672883	-0.571572	+	D:\CHENYUWAN\20240212-dia-lumos\ddab-enps-1h-dia-label-fee\Blank-NPs-DIA-Label-free_D:\CHENYUWAN\20240212-dia-lumos\ddab-enps-1h-dia-label-fee\ddab-enps-1h-DIA-Label-free	5.11191	0.000566802	0.17206	29.6272	P26373	P26373;H3BUK8;J3KS98	RL13_HUMAN	60S ribosomal protein L13
6.42485	6.40684	6.39791	6.48625	6.47824	6.49318	6.40987	6.48589	1.1913	0.252537	+	D:\CHENYUWAN\20240212-dia-lumos\ddab-enps-1h-dia-label-fee\Blank-NPs-DIA-Label-free_D:\CHENYUWAN\20240212-dia-lumos\ddab-enps-1h-dia-label-fee\ddab-enps-1h-DIA-Label-free	2.96386	0.00272961	-0.076021	-8.42504	P26440	P26440;H7C4G6;H0YKV0;A0A0A0MT83;H0YN10;H0YLC3	IVD_HUMAN	Isovaleryl-CoA dehydrogenase, mitochondrial
7.39425	7.37917	7.36513	7.18633	7.18045	7.19373	7.37951	7.18683	0.641682	-0.640069	+	D:\CHENYUWAN\20240212-dia-lumos\ddab-enps-1h-dia-label-fee\Blank-NPs-DIA-Label-free_D:\CHENYUWAN\20240212-dia-lumos\ddab-enps-1h-dia-label-fee\ddab-enps-1h-DIA-Label-free	4.50429	0.000343137	0.19268	20.8426	P26447	P26447	S10A4_HUMAN	Protein S100-A4
6.11917	6.13214	6.14632	6.15439	6.11079	6.13648	6.13254	6.13389	1.0031	0.00447132			0.0304344	0.981002	-0.00134548	-0.0903917	P26572	P26572;D6RF69	MGAT1_HUMAN	Alpha-1,3-mannosyl-glycoprotein 2-beta-N-acetylglucosaminyltransferase
6.57573	6.57552	6.55609	6.75567	6.75809	6.7655	6.56911	6.75975	1.55111	0.633301	+	D:\CHENYUWAN\20240212-dia-lumos\ddab-enps-1h-dia-label-fee\Blank-NPs-DIA-Label-free_D:\CHENYUWAN\20240212-dia-lumos\ddab-enps-1h-dia-label-fee\ddab-enps-1h-DIA-Label-free	4.92959	0.000477816	-0.190643	-26.6636	P26583	P26583;D6R9A6	HMGB2_HUMAN	High mobility group protein B2
7.59322	7.5918	7.59121	7.59504	7.60829	7.59683	7.59208	7.60005	1.01854	0.0265001			0.88625	0.0953887	-0.00797701	-1.90198	P26599	P26599;A6NLN1;A0A0D9SF20;A0A0U1RRM4	PTBP1_HUMAN	Polypyrimidine tract-binding protein 1
7.08652	7.0847	7.08774	6.74485	6.7441	6.72545	7.08632	6.73813	0.448553	-1.15665	+	D:\CHENYUWAN\20240212-dia-lumos\ddab-enps-1h-dia-label-fee\Blank-NPs-DIA-Label-free_D:\CHENYUWAN\20240212-dia-lumos\ddab-enps-1h-dia-label-fee\ddab-enps-1h-DIA-Label-free	6.16349	0	0.348186	54.3457	P26639	P26639;A2RTX5;B7ZLP8	SYTC_HUMAN	Threonine--tRNA ligase, cytoplasmic
6.87404	6.87019	6.86655	6.59686	6.60616	6.60089	6.87026	6.6013	0.538325	-0.89345	+	D:\CHENYUWAN\20240212-dia-lumos\ddab-enps-1h-dia-label-fee\Blank-NPs-DIA-Label-free_D:\CHENYUWAN\20240212-dia-lumos\ddab-enps-1h-dia-label-fee\ddab-enps-1h-DIA-Label-free	6.78948	0	0.268955	77.9453	P26640	P26640;A2ABF4;A0A0G2JJT9;A0A140T954	SYVC_HUMAN	Valine--tRNA ligase
7.73934	7.72654	7.72503	7.52528	7.5326	7.52046	7.73031	7.52611	0.624897	-0.67831	+	D:\CHENYUWAN\20240212-dia-lumos\ddab-enps-1h-dia-label-fee\Blank-NPs-DIA-Label-free_D:\CHENYUWAN\20240212-dia-lumos\ddab-enps-1h-dia-label-fee\ddab-enps-1h-DIA-Label-free	5.42601	0	0.204192	35.5196	P26641	P26641	EF1G_HUMAN	Elongation factor 1-gamma
7.37815	7.36083	7.35699	7.23167	7.2346	7.26545	7.36532	7.24391	0.756108	-0.403336	+	D:\CHENYUWAN\20240212-dia-lumos\ddab-enps-1h-dia-label-fee\Blank-NPs-DIA-Label-free_D:\CHENYUWAN\20240212-dia-lumos\ddab-enps-1h-dia-label-fee\ddab-enps-1h-DIA-Label-free	3.18615	0.00221471	0.121416	9.62545	P26885	P26885;F5H0N4	FKBP2_HUMAN	Peptidyl-prolyl cis-trans isomerase FKBP2
7.42757	7.44558	7.43546	7.42442	7.43276	7.44048	7.4362	7.43255	0.99163	-0.0121261			0.201636	0.76028	0.00365019	0.523035	P27105	P27105	STOM_HUMAN	Erythrocyte band 7 integral membrane protein
6.94752	6.92631	6.93342	6.97493	6.96685	6.965	6.93575	6.96893	1.07939	0.110217	+	D:\CHENYUWAN\20240212-dia-lumos\ddab-enps-1h-dia-label-fee\Blank-NPs-DIA-Label-free_D:\CHENYUWAN\20240212-dia-lumos\ddab-enps-1h-dia-label-fee\ddab-enps-1h-DIA-Label-free	2.05762	0.00966315	-0.0331786	-4.78282	P27144	P27144;D3DQ64	KAD4_HUMAN	Adenylate kinase 4, mitochondrial
6.98055	6.98106	6.97141	6.98613	6.97938	6.987	6.97767	6.98417	1.01507	0.0215848			0.75591	0.130589	-0.00649754	-1.64447	P27338	P27338	AOFB_HUMAN	Amine oxidase [flavin-containing] B
6.62003	6.60766	6.62529	6.58326	6.57345	6.59456	6.61766	6.58376	0.924897	-0.112636			1.87096	0.0136601	0.0339069	4.22166	P27348	P27348;E9PG15	1433T_HUMAN	14-3-3 protein theta
5.81684	5.84526	5.84181	5.93936	5.8827	5.87925	5.83464	5.90044	1.16359	0.218588			1.42764	0.0311471	-0.0658016	-3.06828	P27540	P27540	ARNT_HUMAN	Aryl hydrocarbon receptor nuclear translocator
7.67999	7.6647	7.6633	7.45419	7.47103	7.44508	7.66933	7.45677	0.612967	-0.706118	+	D:\CHENYUWAN\20240212-dia-lumos\ddab-enps-1h-dia-label-fee\Blank-NPs-DIA-Label-free_D:\CHENYUWAN\20240212-dia-lumos\ddab-enps-1h-dia-label-fee\ddab-enps-1h-DIA-Label-free	4.66422	0.000381471	0.212562	22.8673	P27635	Q96L21;P27635;H7C123;H7C2C5;A0A087WV22;X1WI28;F8W7C6	RL10_HUMAN	60S ribosomal protein L10
5.79963	5.76135	5.79406	5.76752	5.79957	5.71154	5.78501	5.75954	0.94304	-0.0846095			0.376855	0.394459	0.0254701	0.898113	P27658	P27658	CO8A1_HUMAN	Collagen alpha-1(VIII) chain
6.47873	6.50422	6.51083	6.66849	6.67405	6.66079	6.49793	6.66778	1.47859	0.564222	+	D:\CHENYUWAN\20240212-dia-lumos\ddab-enps-1h-dia-label-fee\Blank-NPs-DIA-Label-free_D:\CHENYUWAN\20240212-dia-lumos\ddab-enps-1h-dia-label-fee\ddab-enps-1h-DIA-Label-free	4.06589	0.000520211	-0.169848	-16.1531	P27694	P27694;I3L4R8	RFA1_HUMAN	Replication protein A 70 kDa DNA-binding subunit
7.11707	7.11225	7.12685	7.26764	7.25005	7.25714	7.11873	7.25828	1.37895	0.463574	+	D:\CHENYUWAN\20240212-dia-lumos\ddab-enps-1h-dia-label-fee\Blank-NPs-DIA-Label-free_D:\CHENYUWAN\20240212-dia-lumos\ddab-enps-1h-dia-label-fee\ddab-enps-1h-DIA-Label-free	4.51025	0.000344828	-0.13955	-20.9147	P27695	P27695;G3V5M0;G3V3C7;G3V359;G3V3M6	APEX1_HUMAN	DNA-(apurinic or apyrimidinic site) lyase
6.44735	6.48726	6.44479	6.50114	6.47293	6.45704	6.4598	6.47704	1.04049	0.0572623			0.38484	0.38432	-0.0172378	-0.914382	P27701	P27701	CD82_HUMAN	CD82 antigen
6.72173	6.7282	6.73379	6.2881	6.28081	6.26829	6.7279	6.27907	0.355764	-1.49101	+	D:\CHENYUWAN\20240212-dia-lumos\ddab-enps-1h-dia-label-fee\Blank-NPs-DIA-Label-free_D:\CHENYUWAN\20240212-dia-lumos\ddab-enps-1h-dia-label-fee\ddab-enps-1h-DIA-Label-free	6.51261	0	0.448838	66.4549	P27708	P27708;F8VPD4	PYR1_HUMAN	CAD protein
8.12506	8.13381	8.11858	8.00732	8.00561	8.00713	8.12582	8.00669	0.760095	-0.395749	+	D:\CHENYUWAN\20240212-dia-lumos\ddab-enps-1h-dia-label-fee\Blank-NPs-DIA-Label-free_D:\CHENYUWAN\20240212-dia-lumos\ddab-enps-1h-dia-label-fee\ddab-enps-1h-DIA-Label-free	4.93791	0.000482759	0.119132	26.7922	P27797	P27797;K7EJB9	CALR_HUMAN	Calreticulin
6.78035	6.78594	6.77308	6.41631	6.41017	6.44805	6.77979	6.42484	0.441621	-1.17912	+	D:\CHENYUWAN\20240212-dia-lumos\ddab-enps-1h-dia-label-fee\Blank-NPs-DIA-Label-free_D:\CHENYUWAN\20240212-dia-lumos\ddab-enps-1h-dia-label-fee\ddab-enps-1h-DIA-Label-free	5.06459	0.000546875	0.354951	28.8282	P27816	P27816;E7EVA0	MAP4_HUMAN	Microtubule-associated protein 4
8.12049	8.11332	8.11506	8.05241	8.06509	8.05116	8.11629	8.05622	0.870826	-0.199544	+	D:\CHENYUWAN\20240212-dia-lumos\ddab-enps-1h-dia-label-fee\Blank-NPs-DIA-Label-free_D:\CHENYUWAN\20240212-dia-lumos\ddab-enps-1h-dia-label-fee\ddab-enps-1h-DIA-Label-free	3.5795	0.00077665	0.0600684	12.1499	P27824	P27824	CALX_HUMAN	Calnexin
7.04222	7.05136	7.03595	7.07986	7.07234	7.06609	7.04317	7.07276	1.07051	0.0982959	+	D:\CHENYUWAN\20240212-dia-lumos\ddab-enps-1h-dia-label-fee\Blank-NPs-DIA-Label-free_D:\CHENYUWAN\20240212-dia-lumos\ddab-enps-1h-dia-label-fee\ddab-enps-1h-DIA-Label-free	2.10705	0.00891641	-0.0295898	-4.94027	P28066	P28066	PSA5_HUMAN	Proteasome subunit alpha type-5
6.98448	6.97767	6.99229	7.04875	7.04336	7.04197	6.98481	7.04469	1.14783	0.198907	+	D:\CHENYUWAN\20240212-dia-lumos\ddab-enps-1h-dia-label-fee\Blank-NPs-DIA-Label-free_D:\CHENYUWAN\20240212-dia-lumos\ddab-enps-1h-dia-label-fee\ddab-enps-1h-DIA-Label-free	3.65877	0.000811671	-0.0598763	-12.7296	P28070	P28070	PSB4_HUMAN	Proteasome subunit beta type-4
7.11164	7.11668	7.08269	7.14997	7.14578	7.12687	7.10367	7.14087	1.08944	0.12359			1.36295	0.0350945	-0.0372044	-2.91741	P28072	P28072;A0A087X2I4;I3L3X7	PSB6_HUMAN	Proteasome subunit beta type-6
6.89045	6.8705	6.88491	6.90427	6.91629	6.90164	6.88195	6.9074	1.06034	0.0845254			1.56816	0.0227547	-0.0254451	-3.40991	P28074	P28074	PSB5_HUMAN	Proteasome subunit beta type-5
6.85697	6.84287	6.85788	6.83367	6.83911	6.83411	6.85257	6.83563	0.961736	-0.0562867			1.51623	0.0254232	0.0169439	3.28133	P28288	P28288	ABCD3_HUMAN	ATP-binding cassette sub-family D member 3
6.5232	6.50874	6.5005	6.50466	6.51583	6.52222	6.51081	6.51424	1.00793	0.0113887			0.152644	0.833184	-0.00342814	-0.408766	P28290	P28290;E7EUL7;E9PHV5	SSFA2_HUMAN	Sperm-specific antigen 2
6.40031	6.32038	6.34337	6.13727	NaN	6.21233	6.35468	6.1748	0.660868	-0.597565			1.64456	0.0200554	0.179885	4.33332	P28300	P28300	LYOX_HUMAN	Protein-lysine 6-oxidase
7.24746	7.24022	7.2451	7.26457	7.27228	7.27539	7.24426	7.27075	1.06289	0.0879968	+	D:\CHENYUWAN\20240212-dia-lumos\ddab-enps-1h-dia-label-fee\Blank-NPs-DIA-Label-free_D:\CHENYUWAN\20240212-dia-lumos\ddab-enps-1h-dia-label-fee\ddab-enps-1h-DIA-Label-free	2.62788	0.00415724	-0.0264896	-6.86669	P28331	P28331;B4DJ81	NDUS1_HUMAN	NADH-ubiquinone oxidoreductase 75 kDa subunit, mitochondrial
6.38763	6.36606	6.35856	6.48858	6.47666	6.50605	6.37075	6.49043	1.3173	0.397581	+	D:\CHENYUWAN\20240212-dia-lumos\ddab-enps-1h-dia-label-fee\Blank-NPs-DIA-Label-free_D:\CHENYUWAN\20240212-dia-lumos\ddab-enps-1h-dia-label-fee\ddab-enps-1h-DIA-Label-free	3.2187	0.00202229	-0.119684	-9.81392	P28340	P28340;M0R2B7;M0QXE6;M0QZR8;M0QXQ2	DPOD1_HUMAN	DNA polymerase delta catalytic subunit
6.4075	6.43792	6.49047	6.38945	6.45035	6.42914	6.4453	6.42298	0.949902	-0.0741488			0.301462	0.538855	0.0223209	0.741612	P28347	Q15562;P28347;Q15561;Q99594;Q53GI4;H0YE88;H0YGS2;H0YG62;A0A0A0MRF3;H0YEJ9	TEAD1_HUMAN	Transcriptional enhancer factor TEF-1
6.07686	6.07964	6.04018	6.10468	6.11879	6.10956	6.06556	6.11101	1.11032	0.150975			1.56376	0.0229146	-0.045448	-3.39891	P28370	P28370;B7ZLQ5;A0A0A0MRP6	SMCA1_HUMAN	Probable global transcription activator SNF2L1
6.07594	6.10049	6.10346	5.88516	5.82185	5.76987	6.0933	5.82563	0.539921	-0.88918	+	D:\CHENYUWAN\20240212-dia-lumos\ddab-enps-1h-dia-label-fee\Blank-NPs-DIA-Label-free_D:\CHENYUWAN\20240212-dia-lumos\ddab-enps-1h-dia-label-fee\ddab-enps-1h-DIA-Label-free	2.82966	0.00332123	0.26767	7.76824	P28482	P28482	MK01_HUMAN	Mitogen-activated protein kinase 1
5.60334	5.65356	5.65697	5.83325	5.83495	5.79604	5.63796	5.82141	1.52565	0.609425	+	D:\CHENYUWAN\20240212-dia-lumos\ddab-enps-1h-dia-label-fee\Blank-NPs-DIA-Label-free_D:\CHENYUWAN\20240212-dia-lumos\ddab-enps-1h-dia-label-fee\ddab-enps-1h-DIA-Label-free	2.98584	0.00249826	-0.183455	-8.53729	P28702	P19793;P28702;P48443;A0A0G2JHI1;A0A0G2JKR7;A0A087WZ88	RXRB_HUMAN	Retinoic acid receptor RXR-beta
5.49192	5.53369	5.37661	5.59655	5.5575	5.60597	5.46741	5.58667	1.31603	0.396196			1.13864	0.0533887	-0.119267	-2.42117	P28715	P28715;R4GMW8	ERCC5_HUMAN	DNA repair protein complementing XP-G cells
6.55869	6.58449	6.58035	6.53509	6.5366	6.54344	6.57451	6.53838	0.920165	-0.120036			1.8984	0.0130281	0.0361341	4.30099	P28799	P28799;K7EPL0;K7EMR1	GRN_HUMAN	Granulins
5.58913	5.50774	5.62335	5.62644	5.38656	NaN	5.57341	5.5065	0.85722	-0.222262			0.259311	0.644693	0.0669078	0.670728	P28827	P28827;Q49AC9;E7EPS8;J3KT55	PTPRM_HUMAN	Receptor-type tyrosine-protein phosphatase mu
6.66625	6.64496	6.65391	6.66117	6.65491	6.63982	6.65504	6.65197	0.992956	-0.0101983			0.127235	0.863372	0.00306988	0.347049	P28838	P28838	AMPL_HUMAN	Cytosol aminopeptidase
6.0691	6.11431	6.0902	6.14507	6.15573	6.20033	6.0912	6.16704	1.19081	0.251941			1.62249	0.0206406	-0.0758413	-3.54755	P29083	P29083;C9J329;E9PER7	T2EA_HUMAN	General transcription factor IIE subunit 1
5.35722	5.37553	5.38002	5.55607	5.64279	5.56854	5.37092	5.58913	1.65277	0.724888	+	D:\CHENYUWAN\20240212-dia-lumos\ddab-enps-1h-dia-label-fee\Blank-NPs-DIA-Label-free_D:\CHENYUWAN\20240212-dia-lumos\ddab-enps-1h-dia-label-fee\ddab-enps-1h-DIA-Label-free	2.83766	0.00325198	-0.218213	-7.80607	P29084	P29084	T2EB_HUMAN	Transcription initiation factor IIE subunit beta
6.78148	6.78796	6.78684	6.51614	6.518	6.5343	6.78542	6.52282	0.54625	-0.872367	+	D:\CHENYUWAN\20240212-dia-lumos\ddab-enps-1h-dia-label-fee\Blank-NPs-DIA-Label-free_D:\CHENYUWAN\20240212-dia-lumos\ddab-enps-1h-dia-label-fee\ddab-enps-1h-DIA-Label-free	5.75757	0	0.262609	43.0069	P29144	P29144;Q5VZU9	TPP2_HUMAN	Tripeptidyl-peptidase 2
6.28972	6.33017	6.34892	6.32569	6.35544	6.28614	6.32294	6.32242	0.99882	-0.00170304			0.00632203	1	0.000512759	0.0192702	P29218	P29218;E5RG13;H0YBL1;E5RIP7	IMPA1_HUMAN	Inositol monophosphatase 1
NaN	5.75167	NaN	6.46243	6.46384	6.42134	5.75167	6.4492	4.98354	2.31717			0	0.997647	-0.697538	0	P29279	P29279	CTGF_HUMAN	Connective tissue growth factor
6.36468	6.36531	6.37025	6.21486	6.24654	6.23153	6.36675	6.23098	0.73153	-0.451012	+	D:\CHENYUWAN\20240212-dia-lumos\ddab-enps-1h-dia-label-fee\Blank-NPs-DIA-Label-free_D:\CHENYUWAN\20240212-dia-lumos\ddab-enps-1h-dia-label-fee\ddab-enps-1h-DIA-Label-free	3.88918	0.000452599	0.135769	14.5698	P29317	P29317	EPHA2_HUMAN	Ephrin type-A receptor 2
5.92055	5.90547	5.93576	5.90781	5.82841	5.85921	5.92059	5.86514	0.880129	-0.184213			1.05449	0.0654349	0.0554536	2.24423	P29353	P29353;X6R6D0;H0Y539	SHC1_HUMAN	SHC-transforming protein 1
6.2644	6.32044	6.24232	6.41721	6.43917	6.4478	6.27572	6.43473	1.44214	0.528209	+	D:\CHENYUWAN\20240212-dia-lumos\ddab-enps-1h-dia-label-fee\Blank-NPs-DIA-Label-free_D:\CHENYUWAN\20240212-dia-lumos\ddab-enps-1h-dia-label-fee\ddab-enps-1h-DIA-Label-free	2.50601	0.00525515	-0.159007	-6.36771	P29372	P29372;A2IDA3	3MG_HUMAN	DNA-3-methyladenine glycosylase
5.33714	5.44853	NaN	5.54689	NaN	NaN	5.39283	5.54689	1.4258	0.511768			0	0.997467	-0.154058	0	P29375	P29375	KDM5A_HUMAN	Lysine-specific demethylase 5A
7.40646	7.41956	7.40577	7.78566	7.78981	7.79776	7.41059	7.79108	2.40152	1.26394	+	D:\CHENYUWAN\20240212-dia-lumos\ddab-enps-1h-dia-label-fee\Blank-NPs-DIA-Label-free_D:\CHENYUWAN\20240212-dia-lumos\ddab-enps-1h-dia-label-fee\ddab-enps-1h-DIA-Label-free	6.51377	0	-0.380486	-66.4992	P29401	P29401;A0A0B4J1R6	TKT_HUMAN	Transketolase
6.33945	6.30002	6.32337	6.37436	6.40714	6.4062	6.32095	6.3959	1.18836	0.248975	+	D:\CHENYUWAN\20240212-dia-lumos\ddab-enps-1h-dia-label-fee\Blank-NPs-DIA-Label-free_D:\CHENYUWAN\20240212-dia-lumos\ddab-enps-1h-dia-label-fee\ddab-enps-1h-DIA-Label-free	2.05304	0.00969138	-0.0749494	-4.76842	P29508;P48594	P48594;P29508;H0Y5H9;C9JZ65	SPB3_HUMAN;SPB4_HUMAN	Serpin B3
6.25003	6.24574	6.32818	6.1825	6.28448	6.22245	6.27465	6.22981	0.901901	-0.14896			0.488431	0.271586	0.0448416	1.12172	P29558	P29558;E7ETU5;F6Y5H0	RBMS1_HUMAN	RNA-binding motif, single-stranded-interacting protein 1
6.32383	6.32743	6.31386	6.34602	6.32467	6.32508	6.32171	6.33193	1.02381	0.0339446			0.556966	0.222995	-0.0102185	-1.25636	P29590	P29590;H3BT57	PML_HUMAN	Protein PML
5.87445	5.87586	5.68569	NaN	5.8282	5.9227	5.812	5.87545	1.15731	0.210774			0.278553	0.5987	-0.0634497	-0.714385	P29597	P29597;E9PM19;H0YE24	TYK2_HUMAN	Non-receptor tyrosine-protein kinase TYK2
7.33473	7.33862	7.32878	7.11842	7.1055	7.1349	7.33404	7.11961	0.61033	-0.712339	+	D:\CHENYUWAN\20240212-dia-lumos\ddab-enps-1h-dia-label-fee\Blank-NPs-DIA-Label-free_D:\CHENYUWAN\20240212-dia-lumos\ddab-enps-1h-dia-label-fee\ddab-enps-1h-DIA-Label-free	4.74	0.000404624	0.214435	23.8932	P29692	P29692;E9PRY8;H0YE72;E9PQZ1;H0YE58	EF1D_HUMAN	Elongation factor 1-delta
6.83585	6.80809	6.80787	6.79869	6.77722	6.774	6.81727	6.7833	0.924769	-0.112835			1.31478	0.0381379	0.0339667	2.80747	P29966	P29966	MARCS_HUMAN	Myristoylated alanine-rich C-kinase substrate
6.85375	6.87391	6.87424	6.86321	6.86437	6.86435	6.8673	6.86397	0.992369	-0.0110509			0.187348	0.781024	0.00332657	0.490284	P29992	P29992;K7EL62	GNA11_HUMAN	Guanine nucleotide-binding protein subunit alpha-11
6.29883	6.38145	6.2895	6.41508	6.33738	6.4158	6.32326	6.38942	1.16456	0.219787			0.779668	0.122979	-0.0661623	-1.69106	P30038	P30038	AL4A1_HUMAN	Delta-1-pyrroline-5-carboxylate dehydrogenase, mitochondrial
7.4467	7.43745	7.43232	7.34103	7.34286	7.35492	7.43882	7.34627	0.808065	-0.307457	+	D:\CHENYUWAN\20240212-dia-lumos\ddab-enps-1h-dia-label-fee\Blank-NPs-DIA-Label-free_D:\CHENYUWAN\20240212-dia-lumos\ddab-enps-1h-dia-label-fee\ddab-enps-1h-DIA-Label-free	3.9705	0.000481301	0.0925539	15.2787	P30040	P30040;F8VY02	ERP29_HUMAN	Endoplasmic reticulum resident protein 29
7.56888	7.5549	7.5586	7.39097	7.38672	7.38033	7.56079	7.38601	0.668671	-0.580631	+	D:\CHENYUWAN\20240212-dia-lumos\ddab-enps-1h-dia-label-fee\Blank-NPs-DIA-Label-free_D:\CHENYUWAN\20240212-dia-lumos\ddab-enps-1h-dia-label-fee\ddab-enps-1h-DIA-Label-free	5.33	0	0.174787	33.6045	P30041	P30041	PRDX6_HUMAN	Peroxiredoxin-6
6.6135	6.61571	6.62394	6.64063	6.65822	6.6337	6.61772	6.64419	1.06285	0.0879348			1.53429	0.0244344	-0.0264711	-3.32573	P30042	P30042;A0A0B4J2D5;A0A0B4J2H4;H7C1F6;A0A096LNH5;H7C2G3;A0A096LPI6	ES1_HUMAN	ES1 protein homolog, mitochondrial
6.25558	6.24257	6.2543	5.79537	5.79979	5.7922	6.25082	5.79579	0.350725	-1.51159	+	D:\CHENYUWAN\20240212-dia-lumos\ddab-enps-1h-dia-label-fee\Blank-NPs-DIA-Label-free_D:\CHENYUWAN\20240212-dia-lumos\ddab-enps-1h-dia-label-fee\ddab-enps-1h-DIA-Label-free	7.17025	0	0.455033	97.0561	P30043	P30043;M0R192;M0QZL1	BLVRB_HUMAN	Flavin reductase (NADPH)
7.62891	7.60179	7.62324	7.58632	7.58732	7.58782	7.61798	7.58716	0.931479	-0.102405			1.69152	0.0187241	0.0308272	3.72721	P30044	P30044	PRDX5_HUMAN	Peroxiredoxin-5, mitochondrial
6.53486	6.5239	6.50781	6.45398	6.47724	6.45705	6.52219	6.46275	0.872098	-0.197438	+	D:\CHENYUWAN\20240212-dia-lumos\ddab-enps-1h-dia-label-fee\Blank-NPs-DIA-Label-free_D:\CHENYUWAN\20240212-dia-lumos\ddab-enps-1h-dia-label-fee\ddab-enps-1h-DIA-Label-free	2.28587	0.00659478	0.0594349	5.54383	P30046	A6NHG4;P30046;B5MC82;J3KQ18	DOPD_HUMAN	D-dopachrome decarboxylase
7.76015	7.76362	7.76353	7.76598	7.78285	7.77883	7.76243	7.77589	1.03147	0.0447021			1.21277	0.0448944	-0.0134567	-2.58093	P30048	P30048	PRDX3_HUMAN	Thioredoxin-dependent peroxide reductase, mitochondrial
7.14325	7.15639	7.14762	7.12052	7.14062	7.12476	7.14909	7.12863	0.953987	-0.0679589			1.32373	0.0374713	0.0204577	2.82773	P30049	P30049	ATPD_HUMAN	ATP synthase subunit delta, mitochondrial
7.92874	7.92636	7.91562	7.7777	7.77306	7.78611	7.92357	7.77896	0.716782	-0.480394	+	D:\CHENYUWAN\20240212-dia-lumos\ddab-enps-1h-dia-label-fee\Blank-NPs-DIA-Label-free_D:\CHENYUWAN\20240212-dia-lumos\ddab-enps-1h-dia-label-fee\ddab-enps-1h-DIA-Label-free	4.88766	0.000460526	0.144613	26.0248	P30050	P30050	RL12_HUMAN	60S ribosomal protein L12
7.21999	7.24179	7.21743	7.23894	7.22574	7.25218	7.2264	7.23896	1.02933	0.0417057			0.505735	0.256963	-0.0125546	-1.15585	P30084	P30084	ECHM_HUMAN	Enoyl-CoA hydratase, mitochondrial
6.87497	6.8327	6.80933	6.63265	6.62842	6.54497	6.839	6.60201	0.579444	-0.787258	+	D:\CHENYUWAN\20240212-dia-lumos\ddab-enps-1h-dia-label-fee\Blank-NPs-DIA-Label-free_D:\CHENYUWAN\20240212-dia-lumos\ddab-enps-1h-dia-label-fee\ddab-enps-1h-DIA-Label-free	2.6329	0.00409993	0.236989	6.88795	P30085	P30085;Q5T0D2	KCY_HUMAN	UMP-CMP kinase
6.92036	6.90131	6.9033	6.59735	6.55536	6.55616	6.90832	6.56962	0.458462	-1.12513	+	D:\CHENYUWAN\20240212-dia-lumos\ddab-enps-1h-dia-label-fee\Blank-NPs-DIA-Label-free_D:\CHENYUWAN\20240212-dia-lumos\ddab-enps-1h-dia-label-fee\ddab-enps-1h-DIA-Label-free	4.62804	0.000365535	0.338697	22.3929	P30086	P30086	PEBP1_HUMAN	Phosphatidylethanolamine-binding protein 1
8.14052	8.13073	8.13645	8.0341	8.03637	8.03295	8.1359	8.03447	0.79172	-0.336938	+	D:\CHENYUWAN\20240212-dia-lumos\ddab-enps-1h-dia-label-fee\Blank-NPs-DIA-Label-free_D:\CHENYUWAN\20240212-dia-lumos\ddab-enps-1h-dia-label-fee\ddab-enps-1h-DIA-Label-free	5.33271	0	0.101428	33.6572	P30101	P30101;H7BZJ3	PDIA3_HUMAN	Protein disulfide-isomerase A3
7.05221	7.04959	7.04784	6.97253	6.97132	6.96149	7.04988	6.96845	0.829026	-0.270511	+	D:\CHENYUWAN\20240212-dia-lumos\ddab-enps-1h-dia-label-fee\Blank-NPs-DIA-Label-free_D:\CHENYUWAN\20240212-dia-lumos\ddab-enps-1h-dia-label-fee\ddab-enps-1h-DIA-Label-free	4.58864	0.00035533	0.0814323	21.8873	P30153	P30153;B3KQV6	2AAA_HUMAN	Serine/threonine-protein phosphatase 2A 65 kDa regulatory subunit A alpha isoform
6.17377	6.17696	6.13907	5.99499	5.95808	5.94953	6.16327	5.96753	0.637183	-0.65022	+	D:\CHENYUWAN\20240212-dia-lumos\ddab-enps-1h-dia-label-fee\Blank-NPs-DIA-Label-free_D:\CHENYUWAN\20240212-dia-lumos\ddab-enps-1h-dia-label-fee\ddab-enps-1h-DIA-Label-free	3.34643	0.00165971	0.195735	10.5876	P30154	P30154	2AAB_HUMAN	Serine/threonine-protein phosphatase 2A 65 kDa regulatory subunit A beta isoform
5.94311	5.94547	5.9232	5.94913	5.92161	5.93256	5.93726	5.93443	0.993505	-0.00940106			0.0947479	0.90552	0.00283003	0.265156	P30260	P30260;G5EA36	CDC27_HUMAN	Cell division cycle protein 27 homolog
4.94863	NaN	5.05264	5.08895	5.28046	5.51547	5.00064	5.29496	1.96933	0.977702			0.768604	0.126956	-0.294318	-1.79594	P30291	P30291;E9PRU3;E9PRI3	WEE1_HUMAN	Wee1-like protein kinase
7.0939	7.10408	7.11098	7.07548	7.1087	7.09901	7.10299	7.09439	0.980412	-0.0285398			0.318847	0.497314	0.00859102	0.778223	P30405	P30405;R4GN99;H0Y548	PPIF_HUMAN	Peptidyl-prolyl cis-trans isomerase F, mitochondrial
7.00898	7.05776	6.93653	7.00908	6.937	7.00718	7.00109	6.98442	0.962335	-0.0553887			0.145954	0.840832	0.0166739	0.392695	P30408	P30408;F8WBG6;F8WF27	T4S1_HUMAN	Transmembrane 4 L6 family member 1
5.77352	5.81887	5.76183	5.78683	5.76874	5.73663	5.78474	5.76406	0.953508	-0.0686831			0.38193	0.387431	0.0206755	0.908458	P30414	P30414;A0A087WYW3	NKTR_HUMAN	NK-tumor recognition protein
6.54468	6.53223	6.55525	6.36046	6.338	6.31276	6.54405	6.33708	0.6209	-0.687567	+	D:\CHENYUWAN\20240212-dia-lumos\ddab-enps-1h-dia-label-fee\Blank-NPs-DIA-Label-free_D:\CHENYUWAN\20240212-dia-lumos\ddab-enps-1h-dia-label-fee\ddab-enps-1h-DIA-Label-free	3.76223	0.000416901	0.206979	13.5263	P30419	P30419	NMT1_HUMAN	Glycylpeptide N-tetradecanoyltransferase 1
6.81898	6.78236	6.8061	6.75468	6.73662	6.74706	6.80248	6.74612	0.8783	-0.187215	+	D:\CHENYUWAN\20240212-dia-lumos\ddab-enps-1h-dia-label-fee\Blank-NPs-DIA-Label-free_D:\CHENYUWAN\20240212-dia-lumos\ddab-enps-1h-dia-label-fee\ddab-enps-1h-DIA-Label-free	2.0381	0.00986005	0.0563572	4.72169	P30464;P30491;P30685	P30461;P30479;P30481;Q95365;Q04826;P18463;P30483;P30487;P18464;Q29940;P30486;P30488;P30490;P30464;P30466;P30685;P30485;P30491;A0A140TA14;A0A140T9Y5;A0A140TA11;A0A140T997;A0A140TA13;A0A140TA02;A0A140T953	1B15_HUMAN;1B35_HUMAN;1B53_HUMAN	HLA class I histocompatibility antigen, B-15 alpha chain
7.23124	7.22044	7.22195	7.12448	7.16851	7.17374	7.22454	7.15558	0.853167	-0.2291			1.9033	0.0127941	0.0689661	4.31528	P30485	P30485	1B47_HUMAN	HLA class I histocompatibility antigen, B-47 alpha chain
7.35621	7.34984	7.34299	7.25057	7.24798	7.25163	7.34968	7.25006	0.795019	-0.330938	+	D:\CHENYUWAN\20240212-dia-lumos\ddab-enps-1h-dia-label-fee\Blank-NPs-DIA-Label-free_D:\CHENYUWAN\20240212-dia-lumos\ddab-enps-1h-dia-label-fee\ddab-enps-1h-DIA-Label-free	4.82563	0.000432099	0.0996222	25.1074	P30508	Q09160;Q29865;Q9TNN7;Q07000;P04222;P30508;Q29960;P30499;P30501;P30504;Q29963;P30505;P30510;P01893;A0A0G2JIF0;A0A0G2JH50;A0A0G2JPT2;A0A140T9B3;A0A140T9M0;A0A140T9J9;A0A140T937;A0A140T962;A0A140T912;A0A140T9W2;A0A140T930;A0A140T9U0;A2BF26	1C12_HUMAN	HLA class I histocompatibility antigen, Cw-12 alpha chain
6.81301	6.80283	6.81423	6.76416	6.7806	6.76996	6.81002	6.77157	0.915277	-0.12772	+	D:\CHENYUWAN\20240212-dia-lumos\ddab-enps-1h-dia-label-fee\Blank-NPs-DIA-Label-free_D:\CHENYUWAN\20240212-dia-lumos\ddab-enps-1h-dia-label-fee\ddab-enps-1h-DIA-Label-free	2.51098	0.00526194	0.0384477	6.38743	P30519	P30519;I3L159;A0A087WT44;I3L1F5	HMOX2_HUMAN	Heme oxygenase 2
5.95287	5.89443	5.92859	6.00809	5.98911	6.01682	5.9253	6.00467	1.20054	0.263686			1.8697	0.0136655	-0.0793778	-4.21804	P30520	P30520	PURA2_HUMAN	Adenylosuccinate synthetase isozyme 2
6.33066	6.34	6.31679	6.45175	6.45084	6.44996	6.32915	6.45085	1.32343	0.404281	+	D:\CHENYUWAN\20240212-dia-lumos\ddab-enps-1h-dia-label-fee\Blank-NPs-DIA-Label-free_D:\CHENYUWAN\20240212-dia-lumos\ddab-enps-1h-dia-label-fee\ddab-enps-1h-DIA-Label-free	4.25123	0.000282258	-0.121701	-17.9938	P30530	P30530;M0R0W6	UFO_HUMAN	Tyrosine-protein kinase receptor UFO
6.89462	6.88612	6.87811	6.74989	6.75228	6.77066	6.88628	6.75761	0.743586	-0.427429	+	D:\CHENYUWAN\20240212-dia-lumos\ddab-enps-1h-dia-label-fee\Blank-NPs-DIA-Label-free_D:\CHENYUWAN\20240212-dia-lumos\ddab-enps-1h-dia-label-fee\ddab-enps-1h-DIA-Label-free	4.03502	0.000509466	0.128669	15.8649	P30533	P30533	AMRP_HUMAN	Alpha-2-macroglobulin receptor-associated protein
7.03036	7.03453	7.01375	7.10177	7.10298	7.10735	7.02622	7.10403	1.19624	0.258502	+	D:\CHENYUWAN\20240212-dia-lumos\ddab-enps-1h-dia-label-fee\Blank-NPs-DIA-Label-free_D:\CHENYUWAN\20240212-dia-lumos\ddab-enps-1h-dia-label-fee\ddab-enps-1h-DIA-Label-free	3.53674	0.000849383	-0.0778166	-11.8477	P30536	P30536;B1AH87	TSPO_HUMAN	Translocator protein
5.77916	5.81375	5.80385	5.74617	5.78942	5.72893	5.79892	5.75484	0.903484	-0.146428			0.997589	0.0739423	0.0440796	2.12691	P30566	P30566;B4DEP1;A0A1B0GTJ7;A0A1B0GWF8;A0A1B0GTG9;A0A1B0GWJ0;A0A096LNY4;A0A0A6YY92;A0A096LP72;A0A096LNY5	PUR8_HUMAN	Adenylosuccinate lyase
6.24956	6.2527	6.38772	5.8926	5.90653	5.78023	6.29666	5.85979	0.365703	-1.45126	+	D:\CHENYUWAN\20240212-dia-lumos\ddab-enps-1h-dia-label-fee\Blank-NPs-DIA-Label-free_D:\CHENYUWAN\20240212-dia-lumos\ddab-enps-1h-dia-label-fee\ddab-enps-1h-DIA-Label-free	2.70716	0.00397956	0.436872	7.20925	P30622	P30622;F5H1T5;F5H6A0;J3KP58;F6VGP8	CLIP1_HUMAN	CAP-Gly domain-containing linker protein 1
6.24391	6.25895	6.26334	5.88406	5.8613	5.87728	6.2554	5.87421	0.415731	-1.26628	+	D:\CHENYUWAN\20240212-dia-lumos\ddab-enps-1h-dia-label-fee\Blank-NPs-DIA-Label-free_D:\CHENYUWAN\20240212-dia-lumos\ddab-enps-1h-dia-label-fee\ddab-enps-1h-DIA-Label-free	5.74029	0	0.381188	42.5807	P30626	P30626;C9J0K6	SORCN_HUMAN	Sorcin
NaN	6.1216	5.89745	6.04277	6.04423	5.89027	6.00953	5.99242	0.961389	-0.0568072			0.0542589	0.952094	0.0171006	0.160683	P30740	P30740	ILEU_HUMAN	Leukocyte elastase inhibitor
6.93806	6.93694	6.94683	6.92518	6.93891	6.93933	6.94061	6.93447	0.985968	-0.0203867			0.475186	0.283793	0.00613674	1.09552	P30825	P30825	CTR1_HUMAN	High affinity cationic amino acid transporter 1
6.72273	6.72163	6.71991	6.75533	6.74759	6.76613	6.72142	6.75635	1.08374	0.116016	+	D:\CHENYUWAN\20240212-dia-lumos\ddab-enps-1h-dia-label-fee\Blank-NPs-DIA-Label-free_D:\CHENYUWAN\20240212-dia-lumos\ddab-enps-1h-dia-label-fee\ddab-enps-1h-DIA-Label-free	2.51891	0.00523995	-0.0349245	-6.419	P30837	P30837	AL1B1_HUMAN	Aldehyde dehydrogenase X, mitochondrial
6.63176	6.63826	6.64489	6.63762	6.63786	6.64486	6.6383	6.64012	1.00419	0.00602708			0.151309	0.834556	-0.00181405	-0.405569	P30876	P30876;C9J2Y9;C9J4M6	RPB2_HUMAN	DNA-directed RNA polymerase II subunit RPB2
7.2648	7.27359	7.26753	7.29967	7.29663	7.29696	7.26864	7.29775	1.06934	0.0967146	+	D:\CHENYUWAN\20240212-dia-lumos\ddab-enps-1h-dia-label-fee\Blank-NPs-DIA-Label-free_D:\CHENYUWAN\20240212-dia-lumos\ddab-enps-1h-dia-label-fee\ddab-enps-1h-DIA-Label-free	3.33283	0.00199566	-0.0291142	-10.5026	P31040	P31040;D6RFM5	SDHA_HUMAN	Succinate dehydrogenase [ubiquinone] flavoprotein subunit, mitochondrial
6.51965	6.53378	6.51976	6.72884	6.71698	6.73167	6.5244	6.72583	1.59013	0.669143	+	D:\CHENYUWAN\20240212-dia-lumos\ddab-enps-1h-dia-label-fee\Blank-NPs-DIA-Label-free_D:\CHENYUWAN\20240212-dia-lumos\ddab-enps-1h-dia-label-fee\ddab-enps-1h-DIA-Label-free	5.18931	0	-0.201432	-30.9822	P31153	P31153	METK2_HUMAN	S-adenosylmethionine synthase isoform type-2
NaN	5.85023	5.87503	NaN	5.1736	NaN	5.86263	5.1736	0.20463	-2.28891			0	0.997286	0.68903	0	P31271	P31271	HXA13_HUMAN	Homeobox protein Hox-A13
8.56156	8.56191	8.56033	8.56097	8.56956	8.56166	8.56127	8.56406	1.00645	0.00927593			0.426604	0.331039	-0.00279236	-0.998717	P31327	P31327;Q5R211;E7EWJ3	CPSM_HUMAN	Carbamoyl-phosphate synthase [ammonia], mitochondrial
6.18722	6.20266	6.20778	5.48731	NaN	5.49931	6.19922	5.49331	0.196829	-2.34498	+	D:\CHENYUWAN\20240212-dia-lumos\ddab-enps-1h-dia-label-fee\Blank-NPs-DIA-Label-free_D:\CHENYUWAN\20240212-dia-lumos\ddab-enps-1h-dia-label-fee\ddab-enps-1h-DIA-Label-free	5.31976	0	0.70591	77.2071	P31350	P31350	RIR2_HUMAN	Ribonucleoside-diphosphate reductase subunit M2
6.01019	6.12553	6.09987	5.88108	5.95181	5.94602	6.07853	5.9263	0.704321	-0.505696			1.66331	0.0192441	0.15223	3.65312	P31431	P31431	SDC4_HUMAN	Syndecan-4
5.99895	5.95525	5.99018	5.90023	5.94603	5.82246	5.98146	5.88957	0.809298	-0.305256			1.12367	0.0554439	0.0918913	2.38936	P31483	P31483;C9JTN7;F8W8I6	TIA1_HUMAN	Nucleolysin TIA-1 isoform p40
6.7518	6.73351	6.75212	6.81028	6.81953	6.82544	6.74581	6.81841	1.18196	0.241184	+	D:\CHENYUWAN\20240212-dia-lumos\ddab-enps-1h-dia-label-fee\Blank-NPs-DIA-Label-free_D:\CHENYUWAN\20240212-dia-lumos\ddab-enps-1h-dia-label-fee\ddab-enps-1h-DIA-Label-free	3.18041	0.00220813	-0.0726035	-9.59255	P31641	P31641;A0A087WYN0;A0A087WY96;C9JPV1	SC6A6_HUMAN	Sodium- and chloride-dependent taurine transporter
6.73307	6.72705	6.72119	6.35009	6.37425	6.35966	6.72711	6.36134	0.430756	-1.21506	+	D:\CHENYUWAN\20240212-dia-lumos\ddab-enps-1h-dia-label-fee\Blank-NPs-DIA-Label-free_D:\CHENYUWAN\20240212-dia-lumos\ddab-enps-1h-dia-label-fee\ddab-enps-1h-DIA-Label-free	5.90366	0	0.365769	46.7868	P31689	P31689	DNJA1_HUMAN	DnaJ homolog subfamily A member 1
7.61389	7.60277	7.60897	7.61753	7.62399	7.63357	7.60855	7.62503	1.03868	0.054752			1.35986	0.0351722	-0.0164817	-2.91029	P31930	P31930	QCR1_HUMAN	Cytochrome b-c1 complex subunit 1, mitochondrial
7.02816	7.04687	7.02314	7.04815	7.03087	7.05115	7.03272	7.04339	1.02487	0.0354372			0.483374	0.276371	-0.0106675	-1.11173	P31937	P31937	3HIDH_HUMAN	3-hydroxyisobutyrate dehydrogenase, mitochondrial
6.5993	6.57604	6.60554	6.53097	6.55417	6.52328	6.59363	6.53614	0.876015	-0.190973			1.94957	0.0117983	0.0574889	4.45179	P31939	P31939	PUR9_HUMAN	Bifunctional purine biosynthesis protein PURH
7.46481	7.45233	7.44726	7.43542	7.40293	7.43689	7.4548	7.42508	0.933855	-0.0987288			1.14111	0.0532309	0.0297205	2.42644	P31942	P31942	HNRH3_HUMAN	Heterogeneous nuclear ribonucleoprotein H3
7.89205	7.89508	7.89539	7.8753	7.87749	7.8895	7.89417	7.88076	0.969602	-0.044536			1.37823	0.0339928	0.0134069	2.95269	P31943	P31943;G8JLB6;H0YB39	HNRH1_HUMAN	Heterogeneous nuclear ribonucleoprotein H
6.48649	6.47473	6.48115	6.38338	6.37576	6.41644	6.48079	6.39186	0.814834	-0.295421	+	D:\CHENYUWAN\20240212-dia-lumos\ddab-enps-1h-dia-label-fee\Blank-NPs-DIA-Label-free_D:\CHENYUWAN\20240212-dia-lumos\ddab-enps-1h-dia-label-fee\ddab-enps-1h-DIA-Label-free	2.62952	0.00416874	0.0889306	6.87365	P31946	P31946	1433B_HUMAN	14-3-3 protein beta/alpha
6.44249	6.37617	6.38751	6.12021	6.11926	6.09206	6.40206	6.11051	0.511041	-0.968489	+	D:\CHENYUWAN\20240212-dia-lumos\ddab-enps-1h-dia-label-fee\Blank-NPs-DIA-Label-free_D:\CHENYUWAN\20240212-dia-lumos\ddab-enps-1h-dia-label-fee\ddab-enps-1h-DIA-Label-free	3.69179	0.000558266	0.291545	12.9789	P31947	P31947	1433S_HUMAN	14-3-3 protein sigma
7.41716	7.40924	7.40669	7.27597	7.2788	7.27609	7.41103	7.27696	0.734387	-0.445388	+	D:\CHENYUWAN\20240212-dia-lumos\ddab-enps-1h-dia-label-fee\Blank-NPs-DIA-Label-free_D:\CHENYUWAN\20240212-dia-lumos\ddab-enps-1h-dia-label-fee\ddab-enps-1h-DIA-Label-free	5.66726	0	0.134075	40.8243	P31948	P31948;F5H783;F5GXD8	STIP1_HUMAN	Stress-induced-phosphoprotein 1
7.26456	7.28641	7.27891	7.07288	7.03525	7.05742	7.27663	7.05519	0.600565	-0.735608	+	D:\CHENYUWAN\20240212-dia-lumos\ddab-enps-1h-dia-label-fee\Blank-NPs-DIA-Label-free_D:\CHENYUWAN\20240212-dia-lumos\ddab-enps-1h-dia-label-fee\ddab-enps-1h-DIA-Label-free	4.20227	0.000271845	0.22144	17.4886	P31949	P31949	S10AB_HUMAN	Protein S100-A11
6.83304	6.82753	6.83361	6.74839	6.74798	6.75324	6.83139	6.74987	0.828855	-0.270808	+	D:\CHENYUWAN\20240212-dia-lumos\ddab-enps-1h-dia-label-fee\Blank-NPs-DIA-Label-free_D:\CHENYUWAN\20240212-dia-lumos\ddab-enps-1h-dia-label-fee\ddab-enps-1h-DIA-Label-free	5.22853	0	0.0815215	31.692	P32004	P32004;H0Y5C3	L1CAM_HUMAN	Neural cell adhesion molecule L1
6.79985	6.80773	6.80702	6.72206	6.72483	6.74079	6.80486	6.72923	0.84016	-0.251264	+	D:\CHENYUWAN\20240212-dia-lumos\ddab-enps-1h-dia-label-fee\Blank-NPs-DIA-Label-free_D:\CHENYUWAN\20240212-dia-lumos\ddab-enps-1h-dia-label-fee\ddab-enps-1h-DIA-Label-free	3.544	0.000855721	0.075638	11.8985	P32119	P32119	PRDX2_HUMAN	Peroxiredoxin-2
6.02123	6.03399	6.03182	6.00271	6.00756	5.93655	6.02901	5.98227	0.897968	-0.155265			0.940656	0.082784	0.0467394	2.0112	P32189	P32189;Q14409;H7C2A0	GLPK_HUMAN	Glycerol kinase
5.94875	5.95479	5.97561	5.94713	5.95048	5.97856	5.95971	5.95872	0.997716	-0.00329867			0.0258777	0.984884	0.000993411	0.0772225	P32320	P32320	CDD_HUMAN	Cytidine deaminase
7.25514	7.25466	7.25326	7.26686	7.27157	7.27108	7.25435	7.26984	1.03629	0.0514312	+	D:\CHENYUWAN\20240212-dia-lumos\ddab-enps-1h-dia-label-fee\Blank-NPs-DIA-Label-free_D:\CHENYUWAN\20240212-dia-lumos\ddab-enps-1h-dia-label-fee\ddab-enps-1h-DIA-Label-free	3.19544	0.00222355	-0.0154823	-9.67891	P32322	Q96C36;P32322;E2QRB3;A0A087WTV6;A0A087WZR9;J3QKT4;J3KR12	P5CR1_HUMAN	Pyrroline-5-carboxylate reductase 1, mitochondrial
5.54472	5.70454	5.70165	5.81957	5.73987	5.74694	5.6503	5.76879	1.31369	0.393623			0.945698	0.0824089	-0.118492	-2.02138	P32519	P32519;Q6MZZ4;A0A0U1RRL5	ELF1_HUMAN	ETS-related transcription factor Elf-1
6.65458	6.62171	6.64686	6.51105	6.52762	6.5281	6.64105	6.52226	0.760685	-0.394628	+	D:\CHENYUWAN\20240212-dia-lumos\ddab-enps-1h-dia-label-fee\Blank-NPs-DIA-Label-free_D:\CHENYUWAN\20240212-dia-lumos\ddab-enps-1h-dia-label-fee\ddab-enps-1h-DIA-Label-free	3.32003	0.00197849	0.118795	10.4231	P32754	P32754;A0A0B4J1R4	HPPD_HUMAN	4-hydroxyphenylpyruvate dioxygenase
5.8845	5.93755	5.92376	5.92395	5.9128	5.94023	5.91527	5.92566	1.02421	0.0345104			0.228933	0.709769	-0.0103887	-0.584452	P32780	P32780	TF2H1_HUMAN	General transcription factor IIH subunit 1
5.88915	5.95417	5.92938	5.98474	5.89938	5.88041	5.92423	5.92151	0.993754	-0.00903897			0.0244307	0.986527	0.00272067	0.0730155	P32929	P32929	CGL_HUMAN	Cystathionine gamma-lyase
7.57127	7.56477	7.56986	7.37272	7.35629	7.34331	7.56863	7.35744	0.614904	-0.701566	+	D:\CHENYUWAN\20240212-dia-lumos\ddab-enps-1h-dia-label-fee\Blank-NPs-DIA-Label-free_D:\CHENYUWAN\20240212-dia-lumos\ddab-enps-1h-dia-label-fee\ddab-enps-1h-DIA-Label-free	4.7605	0.000412979	0.211192	24.1785	P32969	P32969;E7ESE0;D6RAN4	RL9_HUMAN	60S ribosomal protein L9
6.40496	6.43927	6.42437	6.45897	6.46613	6.43712	6.42287	6.45407	1.0745	0.10367			1.11018	0.0569421	-0.0312074	-2.36083	P32970	P32970	CD70_HUMAN	CD70 antigen
NaN	5.73444	NaN	5.63362	NaN	5.89172	5.73444	5.76267	1.06717	0.093788			0	0.997106	-0.0282328	0	P33121	P33121;B7Z3Z9;E7EPM6;H0Y9Z9;D6RER0	ACSL1_HUMAN	Long-chain-fatty-acid--CoA ligase 1
6.6327	6.63798	6.65352	6.41543	6.43314	6.43473	6.6414	6.42777	0.611461	-0.709667	+	D:\CHENYUWAN\20240212-dia-lumos\ddab-enps-1h-dia-label-fee\Blank-NPs-DIA-Label-free_D:\CHENYUWAN\20240212-dia-lumos\ddab-enps-1h-dia-label-fee\ddab-enps-1h-DIA-Label-free	4.76848	0.00041543	0.213631	24.2905	P33176	O60282;P33176;Q12840;J3KNA1;A0A0G2JMZ6	KINH_HUMAN	Kinesin-1 heavy chain
7.09511	7.0745	7.09427	7.07209	7.09193	7.12101	7.08796	7.09501	1.01637	0.0234196			0.169381	0.809063	-0.00704988	-0.448451	P33240	P33240;Q9H0L4;E7EWR4;A0A0A0MT56;E9PID8	CSTF2_HUMAN	Cleavage stimulation factor subunit 2
7.0152	7.03235	7.03974	7.20673	7.20562	7.22486	7.02909	7.2124	1.52513	0.608936	+	D:\CHENYUWAN\20240212-dia-lumos\ddab-enps-1h-dia-label-fee\Blank-NPs-DIA-Label-free_D:\CHENYUWAN\20240212-dia-lumos\ddab-enps-1h-dia-label-fee\ddab-enps-1h-DIA-Label-free	4.35738	0.000307692	-0.183308	-19.1389	P33316	P33316;A0A0C4DGL3;H0YNW5;H0YKI0;H0YNJ9;H0YMM5;H0YMP1;H0YKC5	DUT_HUMAN	Deoxyuridine 5'-triphosphate nucleotidohydrolase, mitochondrial
[truncated: 4,262 more rows]

## Sheet: Figure 3b
D:\CHENYUWAN\20240212-dia-lumos\ddab-enps-3h-DIA-Label-free\Blank-NPs-DIA-Label-free-1.raw	D:\CHENYUWAN\20240212-dia-lumos\ddab-enps-3h-DIA-Label-free\Blank-NPs-DIA-Label-free-2.raw	D:\CHENYUWAN\20240212-dia-lumos\ddab-enps-3h-DIA-Label-free\Blank-NPs-DIA-Label-free-3.raw	D:\CHENYUWAN\20240212-dia-lumos\ddab-enps-3h-DIA-Label-free\ddab-enps-3h-DIA-Label-free-1.raw	D:\CHENYUWAN\20240212-dia-lumos\ddab-enps-3h-DIA-Label-free\ddab-enps-3h-DIA-Label-free-2.raw	D:\CHENYUWAN\20240212-dia-lumos\ddab-enps-3h-DIA-Label-free\ddab-enps-3h-DIA-Label-free-3.raw	Average(Intensity Blank-NPs-DIA-Label-free)	Average(Intensity ddab-enps-3h-DIA-Label-free)	Ratio(Average(Intensity ddab-enps-3h-DIA-Label-free)/Average(Intensity Blank-NPs-DIA-Label-free))	LOG2(Ratio)	Student's T-test Significant D:\CHENYUWAN\20240212-dia-lumos\ddab-enps-3h-DIA-Label-free\Blank-NPs-DIA-Label-free_D:\CHENYUWAN\20240212-dia-lumos\ddab-enps-3h-DIA-Label-free\ddab-enps-3h-DIA-Label-free	Student's T-test significant	-Log Student's T-test p-value D:\CHENYUWAN\20240212-dia-lumos\ddab-enps-3h-DIA-Label-free\Blank-NPs-DIA-Label-free_D:\CHENYUWAN\20240212-dia-lumos\ddab-enps-3h-DIA-Label-free\ddab-enps-3h-DIA-Label-free	Student's T-test q-value D:\CHENYUWAN\20240212-dia-lumos\ddab-enps-3h-DIA-Label-free\Blank-NPs-DIA-Label-free_D:\CHENYUWAN\20240212-dia-lumos\ddab-enps-3h-DIA-Label-free\ddab-enps-3h-DIA-Label-free	Student's T-test Difference D:\CHENYUWAN\20240212-dia-lumos\ddab-enps-3h-DIA-Label-free\Blank-NPs-DIA-Label-free_D:\CHENYUWAN\20240212-dia-lumos\ddab-enps-3h-DIA-Label-free\ddab-enps-3h-DIA-Label-free	Student's T-test Test statistic D:\CHENYUWAN\20240212-dia-lumos\ddab-enps-3h-DIA-Label-free\Blank-NPs-DIA-Label-free_D:\CHENYUWAN\20240212-dia-lumos\ddab-enps-3h-DIA-Label-free\ddab-enps-3h-DIA-Label-free	Protein.Group	Protein.Ids	Protein.Names	Genes	First.Protein.Description
[truncated: 5,702 more rows]

[truncated: 12 more sheets: Figure 3c, Figure 4a, Figure 4b, Figure 4c, Figure 5b, Figure 5c, Supplementary Figure 5a, Supplementary Figure 5b, Supplementary Figure 5c, Supplementary Figure 7a, Supplementary Figure 7b, Supplementary Figure 7c]
